# Supplementary material
Source: publisher figshare collection journal article supplement (https://gsapubs.figshare.com/articles/dataset/_/22087901)
Supplement: Supplementary file 1 [file 2]

## Sheet: 3BD Mnz
Analysis	U (ppm)	Th (ppm)	Th/U	238U/206Pb	%2σ	207Pb/206Pb	%2σ	208Pb/232Th	%2σ	206Pb/238U Age (Ma)	%2σ	207Pb/206Pb Age (Ma)	%2σ	208Pb/232Th Age (Ma)	%2σ	Concordancy		Analysis	La (ppm)	Ce (ppm)	Pr (ppm)	Nd (ppm)	Sm (ppm)	Eu (ppm)	Gd (ppm)	Tb (ppm)	Dy (ppm)	Ho (ppm)	Er (ppm)	Tm (ppm)	Yb (ppm)	Lu (ppm)	Eu/Eu*	Gd/Yb
Proterozoic Monazite
mnz_9_3	2188	54820	25.0548	52.5486	3.01757	0.0851	2.66587	0.005054	2.55062	121.5	3.01757	1315	2.66587	101.9	2.55062	0.0923954		mnz_9_3	426160	407830	323276	271335	175000	2859.68	79899.5	33518	10447.2	3589.74	1350	417.004	170.807	151.22	0.0241839	467.775
18KH1-2-m9-6r	1960	81900	41.7857	37.037	5.55753	0.0852	2.51558	0.00506	7.77164	172	5.55753	1319	2.51558	102	7.77164	0.130402		18KH1-2-m9-6r	370464	383361	327586	256018	148649	1069.27	65829.1	22880.9	7276.42	2509.16	818.125	313.36	112.422	115.447	0.0108093	585.552
mnz_9_7	2553	50300	19.7023	45.2489	3.97821	0.08528	2.23986	0.00603	4.01603	140.9	3.97821	1321	2.23986	121.4	4.01603	0.106662		mnz_9_7	485232	464927	394397	299781	184459	3374.78	85427.1	34072	11463.4	3937.73	1356.25	453.441	208.075	170.732	0.0268842	410.56
18KH1-2-m9-7	2690	59700	22.1933	40.5351	4.23168	0.085	2.66724	0.00639	5.24743	157.1	4.23168	1313	2.66724	128.8	5.24743	0.11965		18KH1-2-m9-7	434599	419250	352371	273523	156081	3019.54	74371.9	29639.9	9593.5	3333.33	1112.5	473.684	171.429	139.837	0.028026	433.836
mnz_9_4	1430	57300	40.0699	38.956	2.90262	0.0862	2.72861	0.00663	2.90844	163.4	2.90262	1339	2.72861	133.6	2.90844	0.122031		mnz_9_4	424473	358891	314655	259737	153378	1527.53	62311.6	21911.4	6382.11	2197.8	781.25	275.304	90.6832	85.7724	0.0156251	687.134
mnz_9_5	3145	49100	15.6121	36.049	3.10818	0.08398	2.22043	0.00694	2.94477	176.4	3.10818	1291	2.22043	139.7	2.94477	0.136638		mnz_9_5	434599	398042	320043	245077	157432	2380.11	68844.2	27977.8	7926.83	2655.68	881.25	299.595	101.242	89.0244	0.0228621	679.995
18KH1-2-m9-3	2720	61200	22.5	33.3333	13.1529	0.0848	2.32177	0.008	12.659	191	13.1529	1309	2.32177	161	12.659	0.145913		18KH1-2-m9-3	426160	412724	353448	253829	183108	756.661	78392	30554	10081.3	3369.96	1218.75	457.49	134.161	121.138	0.00631556	584.31
mnz_9_6	1801	59100	32.8151	31.0559	4.22946	0.0864	2.37085	0.00962	4.06096	204.3	4.22946	1346	2.37085	193.5	4.06096	0.151783		mnz_9_6	367089	429038	381466	301969	127703	2166.96	40150.8	13296.4	3691.06	1179.49	525.625	214.575	54.0373	74.7967	0.0302625	743.02
18KH1-2-m9-4	2390	64300	26.9038	26.738	6.97728	0.08702	2.28408	0.00978	7.72752	236	6.97728	1359	2.28408	197	7.72752	0.173657		18KH1-2-m9-4	415612	422512	351293	284902	177027	696.27	80402	25983.4	9512.2	3186.81	1075	429.15	150.932	136.179	0.00583612	532.705
mnz_9_1	1421	75300	52.9909	22.3214	3.16682	0.08656	2.11296	0.01063	2.94646	282.2	3.16682	1350	2.11296	213.7	2.94646	0.209037		mnz_9_1	383966	371941	301724	273523	147297	1037.3	65326.6	23795	6747.97	2014.65	812.5	252.632	106.211	67.8862	0.0105746	615.064
mnz_9_8	2057	66800	32.4745	12.0482	13.4031	0.08818	2.12378	0.0131	13.1303	509	13.4031	1386	2.12378	263	13.1303	0.367244		mnz_9_8	367089	484502	404095	343545	95270.3	3641.21	15527.6	4155.12	1203.25	430.403	329.375	60.3239	6.21118	11.3821	0.0946704	2499.95
mnz_9_2	2038	61300	30.0785	21.0526	8.86026	0.08804	2.25654	0.0135	9.83513	299	8.86026	1382	2.25654	271	9.83513	0.216353		mnz_9_2	400422	422512	346983	288840	186486	1261.1	75376.9	30193.9	8983.74	2765.57	993.75	392.713	126.708	142.276	0.0106367	594.886
18KH9_35_2	3848	24010	6.2396	43.1035	2.75508	0.0819	4.7229	0.00576	9.14058	147.85	2.75508	1242.24	4.7229	116.1	9.14058	0.119018		18KH9_35_2	451477	451876	373922	249453	70945.9	8827.71	24472.4	8504.16	2658.54	976.19	503.75	174.494	94.4099	47.561	0.211859	259.214
18KH9_27	1877	21450	11.4278	21.0526	2.95869	0.0812	4.58268	0.01101	9.20797	299.15	2.95869	1225.41	4.58268	221.3	9.20797	0.244123		18KH9_27	476793	502447	390086	284464	61554.1	7833.04	15829.1	5817.17	2065.04	1071.43	550	174.089	92.5466	48.374	0.250942	171.04
18KH9_18	1870	26700	14.2781	15.4083	3.72324	0.0891	4.38129	0.01723	9.16919	405.36	3.72324	1405.45	4.38129	345.4	9.16919	0.28842		18KH9_18	481013	517129	406250	280088	74594.6	3658.97	18542.7	5872.58	1752.03	498.168	311.25	78.5425	38.5093	13.4146	0.0983826	481.512
286_4_3	1649	20760	12.5894	10.2669	2.32765	0.08572	3.82701	0.02748	9.19968	599.15	2.32765	1331.01	3.82701	548	9.19968	0.450148		286_4_3	481857	473083	360991	288403	106081	5541.74	36984.9	13157.9	3373.98	904.762	343.75	111.741	42.8571	21.9512	0.0884738	862.982
286_4_5	976	29800	30.5328	10.2564	2.1768	0.0838	3.89768	0.0275	9.09117	599.74	2.1768	1287.04	3.89768	548	9.09117	0.465985		286_4_5	459916	482871	382543	277899	68243.2	1385.44	18593	5152.35	1308.94	390.11	254.375	90.2834	22.9814	18.6992	0.038894	809.045
286_4_7	986	35910	36.4199	8.66551	4.43538	0.0825	4.09569	0.0321	9.42947	704.03	4.43538	1256.53	4.09569	638	9.42947	0.560296		286_4_7	464557	504078	465517	291028	54527	373.002	12864.3	3268.7	813.008	305.861	211.875	42.915	32.9193	19.5122	0.0140835	390.784
286_4_1	1410	18780	13.3191	8.4674	4.26725	0.0866	3.92288	0.0338	10.0806	719.62	4.26725	1350.74	3.92288	673	10.0806	0.532759		286_4_1	473840	437194	367457	269147	112162	4298.4	36582.9	12299.2	2922.76	772.894	340.625	100.405	43.4783	39.0244	0.0671034	841.407
286_4_6	1094	31800	29.0676	7.27802	4.63041	0.08345	3.79013	0.038	10.4762	829.94	4.63041	1278.89	3.79013	754	10.4762	0.648956		286_4_6	468354	463295	413793	297593	55878.4	360.568	12110.6	3213.3	804.878	272.894	235.625	46.1538	21.118	21.1382	0.0138607	573.47
286_4_2	720	20770	28.8472	7.52445	4.91277	0.0883	3.91354	0.0399	9.31721	804.39	4.91277	1388.16	3.91354	791	9.31721	0.579467		286_4_2	481013	455139	354526	242888	92635.1	1714.03	26934.7	7783.93	2073.17	747.253	362.5	139.271	44.7205	18.2927	0.0343143	602.289
Rio Grande Rift-age Monazite
18KH1-2-m9-5r	760	222000	292.105	229.358	4.38211	0.0937	9.39361	0.0004631	2.91175	28.1	4.38211	1450	9.39361	9.36	2.91175	3.00214		18KH1-2-m9-5r	303376	401305	385776	308534	97297.3	3001.78	21356.8	5595.57	1617.89	580.586	348.125	103.644	39.1304	33.7398	0.0658506	545.784
18KH1-1-m7-1r	1080	457000	423.148	250.627	3.40594	0.0907	10.3386	0.000614	3.68453	25.66	3.40594	1420	10.3386	12.41	3.68453	0.0180704		18KH1-1-m7-1r	237131	344209	331897	291028	95945.9	2131.44	16934.7	4515.24	1593.5	642.857	380	163.158	61.4907	52.0325	0.0528775	275.402
mnz_7_5	661	237800	359.758	357.526	3.25982	0.0912	9.74687	0.0006157	2.49656	18.01	3.25982	1490	9.74687	12.44	2.49656	0.0120872		mnz_7_5	307595	386623	387931	328228	103378	2504.44	20753.8	5983.38	1894.31	697.802	500	160.729	65.8385	54.4715	0.0540689	315.222
mnz_7_1	648	220600	340.432	352.113	3.34085	0.093	11.9959	0.000628	2.76611	18.28	3.34085	1470	11.9959	12.7	2.76611	0.0124354		mnz_7_1	259916	362153	350216	345733	92567.6	2220.25	19899.5	5927.98	1768.29	694.139	388.125	174.899	52.1739	56.0976	0.051731	381.407
mnz_7_3	638	253000	396.552	322.477	3.39313	0.083	10.7894	0.000631	2.98709	19.96	3.39313	1300	10.7894	12.76	2.98709	0.0153538		mnz_7_3	262447	376835	401940	350109	97297.3	2699.82	21608	5872.58	1829.27	765.568	484.375	151.012	51.5528	61.3821	0.0588813	419.144
mnz_7_2	679	270800	398.822	294.377	3.51036	0.0815	9.41728	0.000633	3.10087	21.86	3.51036	1190	9.41728	12.8	3.10087	1.70781		mnz_7_2	303797	433931	414871	400438	107432	3392.54	21507.5	6177.29	1699.19	683.15	483.75	127.126	64.5963	42.2764	0.0705768	332.953
18KH1-1-m2-2r	592	221000	373.311	223.714	4.29695	0.086	12.9461	0.000711	3.1172	28.8	4.29695	1280	12.9461	14.36	3.1172	0.0225		18KH1-1-m2-2r	305485	340946	337284	288840	84054.1	1964.48	17336.7	4819.94	1292.68	591.575	386.25	171.66	63.9752	44.3089	0.0514617	270.991
18KH1-1-m2-4c	798	137000	171.679	130.719	3.08809	0.08	9.09756	0.001135	2.72459	49.1	3.08809	1140	9.09756	22.93	2.72459	2.1413		18KH1-1-m2-4c	363291	401305	400862	356674	106081	1936.06	18492.5	5263.16	1508.13	655.678	448.75	136.437	74.5342	47.561	0.0437121	248.107
mnz_gnt_2	766	111300	145.3	133.156	5.44084	0.076	5.0208	0.001155	4.45666	48.2	5.44084	1094	5.0208	23.34	4.45666	2.06512		mnz_gnt_2	310970	406199	371767	350109	94594.6	2060.39	20502.5	5207.76	1565.04	624.542	426.25	168.016	63.9752	48.374	0.0467857	320.476
mnz_gnt_3_3	1213	110800	91.3438	103.627	4.97894	0.0756	3.86464	0.001155	3.65448	61.9	4.97894	1088	3.86464	23.78	3.65448	2.60303		mnz_gnt_3_3	337553	406199	403017	341357	114865	2095.91	18995	5401.66	1483.74	708.791	435.625	159.919	68.323	62.1951	0.0448705	278.017
18KH1-1-m3-3	1170	127000	108.547	101.523	3.815	0.0833	4.6534	0.001203	2.82492	63.2	3.815	1304	4.6534	24.3	2.82492	2.60082		18KH1-1-m3-3	350211	406199	382543	345733	95945.9	2131.44	18844.2	5069.25	1504.07	736.264	460	162.348	62.1118	62.1951	0.0501269	303.392
18KH1-1-m3-4	853	130000	152.403	101.937	3.3203	0.0837	5.51297	0.001252	2.94122	62.9	3.3203	1270	5.51297	25.28	2.94122	2.48813		18KH1-1-m3-4	330802	404568	466595	369803	87162.2	1696.27	16482.4	4681.44	1504.07	584.249	410.625	140.486	76.3975	46.748	0.0447528	215.745
mnz_gnt_1	1315	118600	90.1901	49.7018	3.34713	0.0815	3.2618	0.001337	3.11906	128.4	3.34713	1228	3.2618	27.02	3.11906	4.75204		mnz_gnt_1	392405	419250	379310	339168	116892	4902.31	26281.4	7036.01	2361.79	1086.08	687.5	303.644	144.099	82.9268	0.0884472	182.384
mnz_gnt_3	949	109400	115.279	75.358	3.19128	0.0802	3.29489	0.001394	3.15419	85	3.19128	1195	3.29489	28.15	3.15419	3.01954		mnz_gnt_3_1	302532	389886	355603	330416	93243.2	1971.58	18341.7	5457.06	1565.04	659.341	430	183.401	63.354	59.7561	0.0476745	289.511
mnz_gnt_3_2	995	110700	111.256	71.5308	4.2232	0.0808	3.18227	0.001465	3.78055	89.5	4.2232	1212	3.18227	29.58	3.78055	3.02569		mnz_gnt_3_2	367089	360522	366379	336980	93918.9	2184.72	21005	5401.66	1512.2	609.89	464.375	188.664	66.4596	58.1301	0.0491879	316.057
mnz_gnt_4	1260	99810	79.2143	50.5306	2.70354	0.0813	2.8059	0.00153	2.66726	126.3	2.70354	1226	2.8059	30.89	2.66726	4.0887		mnz_gnt_4	358650	375204	369612	317287	101351	4227.35	21959.8	6398.89	2073.17	860.806	581.25	217.409	77.6398	52.8455	0.0896065	282.842
18KH9_8_8	1171	6260	5.34586	502.513	4.63516	0.067	3.9444	0.0003232	9.21336	12.82	4.63516	836.84	3.9444	6.53	9.21336	0.0153195		18KH9_8_8	514768	399674	326509	277899	70067.6	5417.41	12713.6	3490.3	914.634	417.582	346.25	150.607	73.2919	62.1951	0.181509	173.465
18KH9_8_5	1185	6760	5.70464	485.437	5.55744	0.078	3.92922	0.000345	9.90523	13.27	5.55744	1145.98	3.92922	6.98	9.90523	0.0115796		18KH9_8_5	506329	481240	411638	334792	71621.6	5097.69	12412.1	3185.6	833.333	249.084	241.25	79.3522	26.7081	13.4146	0.170974	464.731
18KH9_10_2	1094	11280	10.3108	427.899	3.44432	0.075	4.26736	0.0004718	9.09772	15.05	3.44432	1067.6	4.26736	9.53	9.09772	0.014097		18KH9_10_2	497890	458401	373922	306346	49527	3872.11	10904.5	2825.48	731.707	256.41	209.375	76.5182	18.0124	13.0081	0.166619	605.389
18KH9_10_4	1140	11200	9.82456	443.459	3.03598	0.058	4.13746	0.0004887	9.00188	14.52	3.03598	528.78	4.13746	9.88	9.00188	0.0274594		18KH9_10_4	527426	484502	412716	321663	54594.6	4191.83	11959.8	3296.4	857.724	285.714	258.75	68.8259	35.4037	21.9512	0.164046	337.812
18KH9_10_1	1125	10640	9.45778	449.64	4.45621	0.059	3.90152	0.000525	9.1433	14.32	4.45621	566.12	3.90152	10.6	9.1433	0.025295		18KH9_10_1	485232	504078	411638	299781	47702.7	3250.44	11155.8	2795.01	674.797	249.084	186.25	57.8947	36.0248	26.0163	0.140903	309.669
18KH9_8_4	1493	7930	5.31145	415.455	4.23663	0.06	3.93377	0.000541	9.17224	15.5	4.23663	602.6	3.93377	10.94	9.17224	0.0257219		18KH9_8_4	523207	535073	476293	295405	44729.7	3090.59	10452.3	2404.43	609.756	217.949	217.5	26.7206	17.3913	17.4797	0.142935	601.005
18KH9_8_3	1414	10680	7.55304	417.014	3.59885	0.075	4.22042	0.000577	9.2719	15.44	3.59885	1067.6	4.22042	11.66	9.2719	0.0144623		18KH9_8_3	468354	499184	480603	288840	37500	3108.35	10251.3	2437.67	695.122	267.399	298.75	93.1174	59.6273	68.2927	0.158535	171.922
18KH9_8_6	1535	15900	10.3583	400.481	3.44685	0.055	4.00188	0.000594	9.1264	16.08	3.44685	411.22	4.00188	12	9.1264	0.0391032		18KH9_8_6	430380	466558	431034	291028	39662.2	2557.73	10150.8	2354.57	528.455	208.791	205	52.2267	22.9814	2.43902	0.127473	441.695
18KH9_2_2	1860	89200	47.957	218.341	3.61911	0.0619	14.0578	0.001161	9.13692	29.46	3.61911	669.693	14.0578	23.46	9.13692	0.0439903		18KH9_2_2	394093	473083	415948	247265	46959.5	2451.15	11005	2819.94	898.374	366.3	272.5	125.911	59.0062	56.0976	0.107824	186.506
286_1_1	517	24840	48.0464	211.417	5.10061	0.112	19.1058	0.000654	9.05754	30.42	1.56	1831.31	0.19	13.21	9.05754	0.0166111		286_1_1	394093	466558	422414	291028	53716.2	1451.15	11155.8	2908.59	772.358	254.579	231.875	50.6073	34.7826	5.28455	0.0592804	320.729
286_1_2	478	23710	49.6025	186.22	11.0944	0.167	17.1634	0.00067	9.142	34.52	3.52	2527.04	0.24	13.53	9.142	0.0136603		286_1_2	451477	476346	473060	299781	55540.5	1385.44	11005	2814.4	784.553	232.601	221.25	44.5344	23.6025	2.43902	0.0560384	466.266
286_1_4	478	23040	48.2008	314.465	4.66409	0.112	19.9828	0.000722	9.05386	20.47	1.41	1831.31	0.2	14.59	9.05386	0.0111778		286_1_4	398312	455139	394397	253829	60540.5	2344.58	11758.8	3213.3	792.683	304.029	243.125	31.1741	28.5714	15.8537	0.0878741	411.558
286_5_1	419	20470	48.8544	311.526	3.47512	0.137	14.346	0.000906	9.49602	20.66	3.47512	2188.84	14.346	18.3	9.49602	0.00943879		286_5_1	459494	484502	399784	271335	62837.8	2220.25	14522.6	3767.31	1028.46	335.165	240.625	66.8016	25.4658	6.09756	0.0734968	570.278
286_2_5	230.3	18160	78.8537	210.97	5.09083	0.232	13.0276	0.00116	9.06546	30.48	1.56	3065.18	0.23	23.42	9.06546	0.00994395		286_2_5	451477	505710	413793	246608	67229.7	3605.68	14522.6	4238.23	1296.75	551.282	443.75	238.866	184.472	162.602	0.115394	78.7253
286_1_9	407	12310	30.2457	168.919	8.91776	0.159	13.1031	0.001508	10.6063	38.05	8.91776	2444.29	13.1031	30.5	10.6063	0.0155669		286_1_9	397046	460033	363147	251204	66351.4	2326.82	12613.1	3961.22	1414.63	811.355	681.25	461.538	357.143	390.244	0.0804318	35.3166
286_8	349.2	22820	65.3494	130.378	3.02836	0.157	12.038	0.001691	9.1375	49.26	3.02836	2422.84	12.038	34.14	9.1375	0.0203315		286_8	577215	464927	311422	240263	129054	18579	33869.3	8975.07	2479.67	996.337	451.25	157.895	67.7019	42.6829	0.281018	500.272
286_5_2	364.3	16470	45.21	146.199	2.22663	0.15	12.5487	0.001861	8.99295	43.94	2.22663	2345.16	12.5487	37.57	8.99295	0.0187365		286_5_2	509705	412724	286638	229759	125000	14991.1	33165.8	9445.98	2418.7	802.198	368.75	141.7	43.4783	41.8699	0.232827	762.814
286_5_3	358.2	16330	45.5891	151.286	3.80514	0.149	10.0873	0.001872	9.05275	42.47	3.80514	2333.71	10.0873	37.79	9.05275	0.0181985		286_5_3	582278	448613	303879	223195	141892	15825.9	34170.9	9944.6	2703.25	902.93	399.375	129.96	67.7019	15.0407	0.227281	504.725
286_5_6	379.5	16790	44.2424	149.031	3.48803	0.13	12.1081	0.00193	9.16219	43.11	3.48803	2097.17	12.1081	38.96	9.16219	0.0205563		286_5_6	538397	427406	326509	233260	123649	14689.2	34170.9	9445.98	2646.34	906.593	415.625	131.579	73.2919	75.6098	0.225982	466.229

## Sheet: Mnz Stds
Analysis	U (ppm)	Th (ppm)	Th/U	238U/206Pb	%2σ	207Pb/206Pb	%2σ	208Pb/232U	%2σ	206Pb/238U Age (Ma)	%2σ	207Pb/206Pb Age (Ma)	%2σ	208Pb/232Th Age (Ma)	%2σ	Concordancy		Analysis	La (ppm)	Ce (ppm)	Pr (ppm)	Nd (ppm)	Sm (ppm)	Eu (ppm)	Gd (ppm)	Tb (ppm)	Dy (ppm)	Ho (ppm)	Er (ppm)	Tm (ppm)	Yb (ppm)	Lu (ppm)	Eu*	Gd/Yb
44069_1	3909	23060	5.89921	14.7081	1.81262	0.05526	3.79325	0.0212	8.99747	424.03	1.81262	421.754	3.79325	424.1	8.99747	1.0054		44069_1	398734	329527	261853	203939	134459	32682.1	77889.4	60387.8	35487.8	18040.3	9812.5	5222.67	2602.48	1577.24	0.319356	29.9289
44069_1	3800	21640	5.69474	14.4718	1.88405	0.05544	4.70401	0.02136	8.97	430.73	1.88405	429.008	4.70401	427	8.97	1.00401		44069_1	426160	349103	293103	209409	133784	53818.8	70351.8	49861.5	28292.7	17087.9	10750	7085.02	3788.82	2361.79	0.554747	18.5683
44069_10	3500	30200	8.62857	14.9701	7.7885	0.05437	3.97484	0.0204	14.364	416.85	7.7885	385.397	3.97484	408	14.364	1.08161		44069_10	438819	362153	285560	231947	141892	39786.9	85427.1	62049.9	37357.7	19230.8	8812.5	4259.11	1645.96	1235.77	0.361379	51.901
44069_11	3800	30600	8.05263	14.6628	3.57455	0.05601	3.85453	0.0213	11.9545	425.3	3.57455	451.766	3.85453	426	11.9545	0.941416		44069_11	421941	357259	285560	227571	147973	39431.6	91959.8	61772.9	38008.1	20128.2	8562.5	4493.93	1627.33	1337.4	0.338029	56.5096
44069_12	5000	40000	8	14.7059	5.93845	0.05503	3.92769	0.0212	10.5475	424.1	5.93845	412.437	3.92769	425	10.5475	1.02828		44069_12	384810	360522	284483	227571	145270	39964.5	84422.1	64542.9	36626	22161.2	9312.5	4939.27	1881.99	1528.46	0.360876	44.858
44069_13	5200	25600	4.92308	14.8677	2.06965	0.05513	4.5348	0.02104	9.04	419.63	2.06965	416.494	4.5348	421	9.04	1.00753		44069_13	396203	349103	248922	209409	143243	40142.1	72864.3	52631.6	30284.6	17307.7	10375	5506.07	2496.89	1654.47	0.392921	29.182
44069_14	3310	23700	7.16012	14.652	1.8834	0.05559	4.70964	0.0213	9	425.6	1.8834	435.029	4.70964	426	9	0.978326		44069_14	386920	321370	280172	227571	150000	37122.6	76381.9	55678.7	35203.3	18681.3	9562.5	5465.59	2366.46	1520.33	0.346814	32.2769
44069_2	3745	24500	6.54206	14.6994	2.02067	0.05535	3.77526	0.02119	9.01944	424.28	2.02067	425.385	3.77526	423.9	9.01944	0.997402		44069_2	426160	323002	276940	216849	143243	39076.4	79899.5	57340.7	32723.6	18022	9506.25	5182.19	2652.17	1475.61	0.365263	30.126
44069_21	4600	30240	6.57391	14.881	2.35805	0.05529	4.35508	0.02071	9.12	419.26	2.35805	422.965	4.35508	414	9.12	0.99124		44069_21	400422	352365	267241	192998	156081	36234.5	75879.4	49584.5	29593.5	14487.2	8375	5789.47	3031.06	2113.82	0.332954	25.034
44069_22	5610	28970	5.16399	14.9701	2.1477	0.05547	4.48771	0.0208	9.04	416.85	2.1477	430.214	4.48771	416	9.04	0.968936		44069_22	451477	342577	267241	201751	158784	40497.3	81909.5	48753.5	33008.1	16886.4	9625	6477.73	3472.05	2548.78	0.355104	23.5911
44069_23	3530	14750	4.17847	14.6671	2.01881	0.05482	4.56537	0.02153	8.99	425.18	2.01881	403.882	4.56537	431	8.99	1.05273		44069_23	464135	363785	290948	251641	153378	64476	77889.4	45152.4	23943.1	15091.6	9562.5	6599.19	3726.71	2674.8	0.589898	20.9003
44069_24	4000	23920	5.98	14.9365	1.86982	0.05604	4.73828	0.02073	8.97	417.75	1.86982	452.955	4.73828	415	8.97	0.922277		44069_24	411814	321370	274784	231947	170946	30905.9	103015	68421.1	33252	17014.7	7112.5	4089.07	1670.81	1089.43	0.232895	61.6559
44069_25	4077	21360	5.23915	14.6843	1.8118	0.05487	4.75821	0.02141	8.96	424.7	1.8118	405.923	4.75821	428	8.96	1.04626		44069_25	403797	340946	289871	238512	156081	36234.5	92462.3	66482	39227.6	20769.2	10062.5	4736.84	1925.47	1126.02	0.301623	48.0207
44069_3	4140	22570	5.45169	14.7102	1.93817	0.05531	3.79764	0.0212	9.02709	423.97	1.93817	423.772	3.79764	424.1	9.02709	1.00047		44069_3	398734	352365	318966	258206	169595	34458.3	92964.8	69806.1	42276.4	22161.2	10000	4736.84	2055.9	1215.45	0.274428	45.2185
44069_30	3960	23770	6.00253	12.3916	2.31974	0.05556	4.38239	0.02495	9.07	500.3	2.31974	433.826	4.38239	498	9.07	1.15323		44069_30	376371	370310	299569	212691	262162	2628.77	109045	62880.9	19674.8	5256.41	1818.75	1125.51	565.217	304.878	0.0155477	192.926
44069_31	5570	25450	4.56912	15.1515	2.50026	0.05531	4.28516	0.02085	9.1	412.01	2.50026	423.772	4.28516	417	9.1	0.972244		44069_31	417722	383361	262931	242888	166216	53641.2	85427.1	54570.6	32357.7	20146.5	12500	8137.65	4093.17	3199.19	0.450157	20.8707
44069_32	3515	19730	5.61309	14.9254	2.14459	0.05505	4.47862	0.02111	8.98	418.06	2.14459	413.249	4.47862	422	8.98	1.01164		44069_32	406751	391517	309267	249453	151351	56483.1	76884.4	50969.5	27764.2	18772.9	11187.5	8542.51	4409.94	3430.89	0.523608	17.4344
44069_33	4054	21900	5.40207	14.7059	2.12937	0.05555	4.50272	0.02151	9.03	424.1	2.12937	433.425	4.50272	430	9.03	0.978484		44069_33	430380	384992	311422	251641	135135	55950.3	73869.3	46814.4	28333.3	16703.3	11375	7327.94	4186.34	3455.28	0.559997	17.6453
44069_34	3772	21890	5.80329	14.4823	2.01754	0.05498	4.57111	0.02106	8.97	430.43	2.01754	410.404	4.57111	421	8.97	1.0488		44069_34	415190	331158	270474	229759	145270	49911.2	69346.7	46260.4	30691.1	18333.3	11312.5	7408.91	3726.71	3077.24	0.497275	18.608
44069_35	3521	21210	6.02386	14.8148	2.24216	0.05537	4.42349	0.02127	9.06	421.08	2.24216	426.191	4.42349	425	9.06	0.988007		44069_35	391983	368679	282328	231947	146622	52575.5	77889.4	50692.5	32235.8	17802.2	10750	8259.11	4111.8	2979.67	0.491977	18.9429
44069_36	3745	20960	5.5968	15.1515	2.16039	0.05477	4.4605	0.0208	8.97	412.01	2.16039	401.839	4.4605	416	8.97	1.02531		44069_36	421097	329527	292026	231947	143919	50799.3	74371.9	50138.5	30894.3	20146.5	10187.5	7044.53	4012.42	2691.06	0.491015	18.5354
44069_37	3923	22290	5.68188	15.4321	2.65317	0.05538	4.22206	0.0202	9.16	404.75	2.65317	426.594	4.22206	404	9.16	0.948795		44069_37	389030	327896	286638	207221	136486	49200.7	71356.8	50415.5	28414.6	16483.5	9875	6518.22	3465.84	2451.22	0.49855	20.5886
44069_4	3920	18860	4.81122	14.7081	1.92035	0.05521	3.73736	0.0212	9.00451	424.03	1.92035	419.733	3.73736	424	9.00451	1.01024		44069_4	402532	334421	306034	247265	160135	34103	93969.8	66482	39715.4	21428.6	9900	4376.52	1521.74	1008.13	0.278007	61.7516
44069_5	3930	24940	6.34606	14.6929	2.08834	0.05555	3.83076	0.02121	9.02697	424.46	2.08834	433.425	3.83076	424.2	9.02697	0.979315		44069_5	403376	357259	271552	207440	156081	34280.6	94974.9	63988.9	36219.5	19047.6	9250	3829.96	1453.42	890.244	0.281559	65.346
44069_6	2610	20200	7.73946	14.7275	3.3238	0.05508	3.86066	0.02118	9.31177	423.49	3.3238	414.467	3.86066	424	9.31177	1.02177		44069_6	409283	349103	312500	251641	151351	36412.1	99497.5	66482	39674.8	20421.2	11062.5	4736.84	1857.14	1235.77	0.29672	53.5756
44069_7	2900	21100	7.27586	14.7275	3.19401	0.05529	3.95834	0.02119	9.29762	423.49	3.19401	422.965	3.95834	424	9.29762	1.00124		44069_7	430380	358891	296336	218162	156081	36056.8	88693.5	67867	39756.1	21721.6	8937.5	4400.81	1645.96	967.48	0.306455	53.8855
44069_8	2990	25500	8.52843	14.5349	5.45447	0.05553	4.00471	0.0213	10.2898	428.92	5.45447	432.623	4.00471	426	10.2898	0.99144		44069_8	405063	349103	276940	208753	156757	33037.3	89949.7	62603.9	37642.3	20146.5	9687.5	5631.58	2645.96	2081.3	0.278222	33.9951
44069_9	3400	24900	7.32353	14.7275	4.40189	0.05529	3.82199	0.02125	9.66349	423.49	4.40189	422.965	3.82199	425	9.66349	1.00124		44069_9	413502	342577	312500	227571	154730	40142.1	97989.9	70083.1	42926.8	20879.1	9687.5	4736.84	1677.02	1345.53	0.326004	58.431
FC1_1	9160	20710	2.26092	112.867	2.05085	0.0478	4.33182	0.002816	8.98637	56.86	2.05085	88.316	4.33182	56.84	8.98637	0.643824		FC1_1	434599	352365	295259	196937	136486	16163.4	71356.8	55955.7	30894.3	19487.2	11812.5	7206.48	3757.76	2235.77	0.163784	18.9892
FC1_2	8630	22120	2.56315	113.379	1.98167	0.0467	4.36086	0.002881	9.04828	56.61	1.98167	32.836	4.36086	58.15	9.04828	1.72402		FC1_2	438819	362153	269397	192341	143243	16358.8	75879.4	55678.7	32479.7	18150.2	11125	6761.13	3484.47	2077.24	0.156911	21.7764
FC1_3	8100	25600	3.16049	116.414	6.47226	0.04714	4.17674	0.00275	11.0478	55.14	6.47226	55.252	4.17674	55.6	11.0478	0.997973		FC1_3	417722	363785	295259	187527	128378	17460	74371.9	53185.6	34593.5	20714.3	11250	6963.56	3782.61	2455.28	0.178688	19.6615
FC1_4	9700	31900	3.28866	123.609	11.5984	0.0441	6.37726	0.00277	13.1992	51.94	11.5984	0.0001	6.37726	56	13.1992	519400		FC1_4	451477	381729	275862	195186	131081	15630.6	71859.3	53462.6	29878	18827.8	10062.5	6518.22	2652.17	2398.37	0.161051	27.0945
FC1_5	9670	30400	3.14374	115.473	2.58686	0.04732	4.05854	0.002787	9.20967	55.59	2.58686	64.3358	4.05854	56.2	9.20967	0.86406		FC1_5	426160	332790	283405	195405	144595	16980.5	79397	56232.7	35650.4	18388.3	11375	7085.02	3161.49	2268.29	0.158479	25.1138
Stern_1	4220	29250	6.93128	12.0482	1.88345	0.05703	3.76923	0.02482	8.97121	514	1.88345	491.702	3.76923	495.6	8.97121	1.04535		Stern_1	400422	380098	332974	225383	279054	2806.39	109045	64819.9	21219.5	5732.6	1962.5	1085.02	627.329	345.528	0.016088	173.825
Stern_1	4770	26620	5.58071	12.21	2.12566	0.05667	4.53613	0.02523	9.05	507.45	2.12566	477.72	4.53613	504	9.05	1.06223		Stern_1	408439	378467	320043	223195	285135	2753.11	105025	62880.9	20081.3	5695.97	1981.25	1137.65	559.627	361.789	0.0159093	187.67
Stern_10	4200	45000	10.7143	12.6263	10.8422	0.0557	4.34927	0.0248	14.3764	491.35	10.8422	439.429	4.34927	495	14.3764	1.11816		Stern_10	380169	367047	301724	195842	275676	2664.3	110050	61218.8	19837.4	5311.36	1943.75	1157.89	521.739	341.463	0.0152964	210.93
Stern_11	4000	44000	11	12.6103	8.21623	0.05399	3.80385	0.026	9.53559	491.94	8.21623	369.619	3.80385	519	9.53559	1.33094		Stern_11	409283	370310	330819	234136	281081	2664.3	108040	62049.9	20162.6	5549.45	2050	1032.39	571.429	369.919	0.0152888	189.07
Stern_12	4500	51000	11.3333	13.6986	13.7849	0.0563	5.76081	0.0217	18.4216	454.2	13.7849	463.222	5.76081	433	18.4216	0.980523		Stern_12	396203	396411	331897	223195	279054	2682.06	108543	64265.9	22439	5641.03	1943.75	1121.46	628.571	398.374	0.0154108	172.682
Stern_13	4460	34890	7.82287	12.0773	2.11471	0.05619	4.5309	0.02513	9.07	512.81	2.11471	458.886	4.5309	502	9.07	1.11751		Stern_13	397046	381729	313578	223195	312838	2682.06	110553	62326.9	20935	5750.92	2000	1137.65	580.745	349.593	0.014422	190.364
Stern_14	4050	37500	9.25926	12.0048	1.95263	0.05779	3.70184	0.02509	9.02795	515.79	1.95263	520.823	3.70184	501	9.02795	0.990337		Stern_14	396624	383361	341595	211160	280405	2770.87	108543	65928	19837.4	5531.14	2000	1157.89	546.584	369.919	0.0158826	198.584
Stern_2	3949	31540	7.98683	12.279	1.90267	0.05708	3.80807	0.0253	9.00687	504.71	1.90267	493.634	3.80807	504.9	9.00687	1.02244		Stern_2	379325	373573	301724	214442	278378	2397.87	106030	60110.8	21463.4	5439.56	2000	1149.8	565.217	398.374	0.013957	187.592
Stern_3	4260	28850	6.7723	12.2429	1.77444	0.05633	4.85248	0.02495	8.96	506.14	1.77444	464.403	4.85248	498	8.96	1.08987		Stern_3	380591	353997	311422	216630	255405	2593.25	111558	60664.8	19390.2	5402.93	1968.75	1060.73	645.963	386.179	0.0153631	172.7
Stern_30	5910	30400	5.14382	12.3457	2.31494	0.05637	4.40436	0.0249	9.1	502.09	2.31494	465.975	4.40436	496.8	9.1	1.0775		Stern_30	359494	368679	304957	221007	276351	2753.11	110050	62603.9	19715.4	5476.19	1937.5	1178.14	596.273	361.789	0.0157869	184.563
Stern_31	5870	36880	6.28279	12.3762	2.41204	0.05711	4.36748	0.02489	9.1	500.9	2.41204	494.792	4.36748	497	9.1	1.01234		Stern_31	391139	371941	315733	221007	271622	2664.3	102010	62603.9	19593.5	5586.08	1975	1089.07	515.528	321.138	0.0160059	197.875
Stern_32	5430	34940	6.43462	12.4224	1.97857	0.05833	4.70745	0.02481	9.04	499.11	1.97857	541.196	4.70745	495	9.04	0.922236		Stern_32	400844	378467	313578	223195	279054	2699.82	110553	60664.8	19349.6	5402.93	1975	1072.87	602.484	414.634	0.0153711	183.495
Stern_33	3930	26910	6.84733	12.5313	2.15242	0.05717	4.53031	0.02452	9.02	494.93	2.15242	497.106	4.53031	490	9.02	0.995622		Stern_33	399156	360522	318966	221007	289865	2735.35	102513	60387.8	20853.7	5586.08	1968.75	1097.17	619.255	394.309	0.0158681	165.542
Stern_34	4190	24160	5.76611	12.5	2.42636	0.05409	4.29401	0.02462	9.12	496.12	2.42636	373.786	4.29401	492	9.12	1.32728		Stern_34	400844	398042	316810	221007	296622	2699.82	115578	65097	20040.7	5494.51	1981.25	1210.53	546.584	369.919	0.0145813	211.455
Stern_35	5490	26550	4.83607	12.6103	2.53821	0.05605	4.28314	0.02444	9.1	491.94	2.53821	453.351	4.28314	488	9.1	1.08512		Stern_35	421941	375204	316810	223195	274324	2699.82	108040	60110.8	20040.7	5604.4	1968.75	1080.97	627.329	378.049	0.0156823	172.222
Stern_4	4050	41000	10.1235	12.0744	1.89883	0.05796	3.74086	0.02495	9.00988	512.93	1.89883	527.264	3.74086	498.1	9.00988	0.972814		Stern_4	401266	383361	323276	225383	277703	2699.82	109548	64819.9	20203.3	5732.6	1981.25	1174.09	658.385	357.724	0.015479	166.389
Stern_5	4170	45100	10.8153	12.2956	1.86115	0.05722	3.77259	0.02482	8.97121	504.06	1.86115	499.032	3.77259	495.5	8.97121	1.01008		Stern_5	382278	339315	288793	212254	275676	2611.01	106533	58171.7	19796.7	5512.82	1900	1076.92	577.64	388.211	0.0152359	184.428
Stern_6	3090	34200	11.068	12.5471	6.70375	0.05765	3.83929	0.02472	9.2803	494.33	6.70375	515.498	3.83929	494	9.2803	0.958937		Stern_6	404219	355628	308190	236324	284459	2738.9	108543	63434.9	20284.6	5567.77	2168.75	1153.85	638.509	390.244	0.0155871	169.994
Stern_7	3130	34000	10.8626	12.0627	2.66197	0.05754	3.85029	0.02501	9.18718	513.41	2.66197	511.302	3.85029	499	9.18718	1.00412		Stern_7	383966	368679	331897	218818	277027	2682.06	108040	58116.3	20122	5238.1	1831.25	1004.05	564.596	348.374	0.015503	191.358
Stern_8	3620	39000	10.7735	12.3001	4.6882	0.05648	3.75177	0.0246	9.96016	503.88	4.6882	470.292	3.75177	492	9.96016	1.07142		Stern_8	411392	414356	324353	229759	281081	2824.16	112060	66205	21707.3	5494.51	2025	1206.48	586.957	373.984	0.0159128	190.918
Stern_9	3800	40000	10.5263	11.9904	3.37005	0.05661	3.82492	0.02544	9.40059	516.39	3.37005	475.378	3.82492	508	9.40059	1.08627		Stern_9	402954	368679	303879	225383	279054	2701.6	106533	65928	19634.1	5860.81	1987.5	1202.43	604.969	402.439	0.0156688	176.096
Strern_21	3960	30960	7.81818	12.2699	2.13062	0.05718	4.54657	0.0249	9.04	505.07	2.13062	497.491	4.54657	497	9.04	1.01523		Strern_21	400000	391517	323276	221007	283108	2841.92	115578	64542.9	22926.8	5439.56	1968.75	1206.48	627.329	414.634	0.0157108	184.238
Strern_22	3810	26310	6.90551	12.2805	1.75184	0.05663	4.89066	0.02527	8.98	504.65	1.75184	476.159	4.89066	505	8.98	1.05983		Strern_22	417722	407830	335129	225383	300676	2770.87	115578	65928	21219.5	5677.66	1975	1137.65	664.596	426.829	0.0148638	173.907
Strern_23	4710	33640	7.14225	12.3001	2.22001	0.05697	4.4782	0.0252	9	503.88	2.22001	489.38	4.4782	502	9	1.02963		Strern_23	400844	352365	304957	216630	268243	2646.54	100503	57894.7	19430.9	5366.3	1918.75	1028.34	552.795	345.528	0.0161185	181.808
Strern_24	5890	28040	4.76061	12.87	2.37025	0.05661	4.37871	0.024	9.13	482.38	2.37025	475.378	4.37871	479	9.13	1.01473		Strern_24	378059	368679	314655	221007	272973	2699.82	114573	62326.9	20772.4	5549.45	1975	1125.51	577.64	353.659	0.0152663	198.347
Strern_25	4420	25710	5.81674	12.407	2.05771	0.057	4.59806	0.02497	8.99	499.7	2.05771	490.541	4.59806	499	8.99	1.01867		Strern_25	400422	370310	322198	221007	266216	2699.82	109548	62326.9	21626	5732.6	2018.75	1190.28	664.596	361.789	0.0158094	164.834
Treb_1	10430	67700	6.49089	22.6295	1.96593	0.05139	4.50578	0.01344	8.98	278.75	1.96593	257.328	4.50578	270	8.98	1.08325		Treb_1	268776	277325	260776	176586	258784	4689.17	112060	85595.6	40853.7	14395.6	8687.5	6275.3	3192.55	1837.4	0.027536	35.1006
Treb_2	3830	30500	7.96345	21.4133	2.81421	0.05164	3.91234	0.01538	9.13997	294.23	2.81421	268.47	3.91234	308.4	9.13997	1.09595		Treb_2	258650	274062	234914	185777	217568	3943.16	90452.3	70360.1	34187	14230.8	6312.5	4858.3	2975.16	1776.42	0.0281085	30.4025
Treb_2	10100	67400	6.67327	22.7376	1.94154	0.05111	4.51649	0.01325	8.96	277.46	1.94154	244.758	4.51649	266	8.96	1.13361		Treb_2	312658	316476	283405	203501	281757	4635.88	134673	104709	43089.4	16703.3	8875	6194.33	3267.08	2077.24	0.0237987	41.2213
Treb_21	7410	80800	10.9042	23.116	1.70844	0.05143	4.74669	0.012857	8.93	273.01	1.70844	259.116	4.74669	258	8.93	1.05362		Treb_21	284810	285481	254310	215098	256081	4706.93	122613	91135.7	40935	16410.3	7875	5465.59	3217.39	1995.93	0.0265632	38.1095
Treb_22	8160	85300	10.4534	23.1267	2.30226	0.05149	4.29777	0.01291	9.06	272.88	2.30226	261.794	4.29777	259	9.06	1.04234		Treb_22	309283	292007	267241	216630	294595	5008.88	134171	90581.7	43902.4	17197.8	8312.5	6113.36	3465.84	2361.79	0.0251941	38.7124
Treb_3	4130	34560	8.36804	21.5424	1.86704	0.05198	3.90269	0.01493	9.03234	292.5	1.86704	283.502	3.90269	299.6	9.03234	1.03174		Treb_3	243460	270799	238147	188184	243243	3925.4	85929.6	68421.1	29918.7	13113.6	5781.25	4696.36	2832.3	1313.01	0.0271514	30.3392
Treb_3	9780	67200	6.87117	22.9516	1.68692	0.05116	4.76093	0.012992	8.92	274.92	1.68692	247.01	4.76093	261	8.92	1.11299		Treb_3	304219	280587	271552	207877	271622	5097.69	130151	90027.7	41910.6	16153.8	9187.5	5951.42	3385.09	2211.38	0.0271124	38.4482
Treb_30	10050	80100	7.97015	23.2992	2.22623	0.0515	4.33825	0.01283	9.08	270.91	2.22623	262.24	4.33825	258	9.08	1.03306		Treb_30	312658	324633	280172	221007	243243	4724.69	119598	79501.4	34918.7	14413.9	7562.5	4696.36	2863.35	1926.83	0.0277007	41.7685
Treb_31	8950	89300	9.97765	23.5018	2.13631	0.05188	4.40073	0.01286	9.02	268.62	2.13631	279.095	4.40073	258	9.02	0.962468		Treb_31	298734	336052	275862	253829	260811	5079.93	124623	86980.6	37439	14688.6	8250	5384.62	3024.84	1995.93	0.0281771	41.1998
Treb_32	10350	77200	7.45894	23.8493	2.4892	0.05161	4.21517	0.01252	9.14	264.78	2.4892	267.137	4.21517	252	9.14	0.991176		Treb_32	278059	288744	269397	207002	267568	4671.4	115075	81440.4	35081.3	14578.8	6881.25	4777.33	2826.09	1947.15	0.0266219	40.719
Treb_4	4380	37400	8.53881	21.9202	2.03949	0.05157	3.9266	0.01468	9.13161	287.57	2.03949	265.358	3.9266	294.5	9.13161	1.0837		Treb_4	246835	301794	238147	176586	210811	4067.5	95979.9	72022.2	33252	12582.4	6056.25	4453.44	2863.35	1581.3	0.028595	33.5201
Treb_4	9330	66700	7.14898	22.7998	1.74508	0.05147	4.7083	0.0131	8.96	276.71	1.74508	260.902	4.7083	263	8.96	1.06059		Treb_4	289030	290375	265086	192560	270270	5523.98	128643	95567.9	39837.4	16666.7	8937.5	6194.33	3465.84	2040.65	0.0296251	37.1175
Treb_5	5090	46400	9.11591	22.5276	1.99075	0.05215	3.86975	0.01424	9.02135	279.99	1.99075	290.965	3.86975	285.7	9.02135	0.96228		Treb_5	308017	336052	306034	227571	279730	5275.31	117588	82271.5	38455.3	16611.7	8187.5	5263.16	3304.35	2028.46	0.0290869	35.5858
Treb_5	8610	68700	7.97909	23.0574	1.74946	0.05156	4.70689	0.01299	8.95	273.69	1.74946	264.913	4.70689	261	8.95	1.03313		Treb_5	268776	292007	244612	216411	260811	5364.12	122613	88365.7	42682.9	17619	9187.5	6234.82	3347.83	2154.47	0.0299963	36.6247
Treb_6	4900	66000	13.4694	22.1239	3.26245	0.05166	3.99091	0.01448	9.31885	284.98	3.26245	269.358	3.99091	290.6	9.31885	1.058		Treb_6	286076	305057	252155	181619	235811	5008.88	105528	77562.3	36056.9	14194.1	6875	5182.19	3093.17	1955.28	0.0317523	34.1164
Treb_7	4990	60500	12.1242	22.2222	2.20476	0.05214	3.76152	0.014	9.07738	283.75	2.20476	290.527	3.76152	281.1	9.07738	0.976673		Treb_7	306751	332790	313578	227571	283108	5488.45	121608	85318.6	44308.9	15879.1	7750	5870.45	3552.8	2166.67	0.0295796	34.2288
Treb_7	7780	72700	9.34447	23.1214	1.79637	0.05171	4.66424	0.013	8.96	272.95	1.79637	271.576	4.66424	261	8.96	1.00506		Treb_7	304219	303426	287716	234136	260135	4973.36	122613	90581.7	40935	17802.2	9625	5829.96	3652.17	2020.33	0.0278472	33.5726
Treb_8	3800	54000	14.2105	23.31	6.70603	0.05231	3.76093	0.01355	11.3298	270.78	6.70603	297.959	3.76093	272	11.3298	0.908784		Treb_8	284388	313214	269397	199125	260811	5328.6	126633	81717.5	38008.1	15000	8187.5	5182.19	3037.27	2223.58	0.0293208	41.6931

## Sheet: 3AC Zrc
Spot Size	Spot #	U	Th	Th/U	207Pb/235U	%2σ	206Pb/238U	%2σ	rho	238U/206Pb	%2σ	207Pb/206Pb	%2σ	206Pb/238U Age (Ma)	%2σ	207Pb/206Pb Age (Ma)	%2σ	Concordancy		Spot #	La	Ce	Pr	Nd	Sm	Eu	Gd	Tb	Dy	Ho	Er	Tm	Yb	Lu	Hf	Eu*	Gd/Yb
35	18KH1_1	326.8	110.8	0.339045	1.31162	6.04143	0.1024	5.75319	0.952289	9.76562	5.75319	0.09294	1.84382	628.5	5.75319	1485.8	1.84382	0.423004		18KH1_1	0.240506	10.4405	1.14224	4.13567	33.7838	10.1243	116.08	213.296	365.854	644.689	975	1303.64	1944.1	2520.33	988.8	0.161671	0.0597091
35	18KH1_100	1054	147.8	0.140228	0.509155	6.1477	0.0427	5.85692	0.9527	23.4192	5.85692	0.08652	1.86836	269.55	5.85692	1349	1.86836	0.199815		18KH1_100	0.379747	4.1925	2.26293	3.6105	28.3784	1.56306	63.6181	131.302	197.561	316.85	615.625	1105.26	2198.76	3296.75	1915.8	0.0367866	0.0289337
35	18KH1_101	664	242	0.364458	0.120886	10.3911	0.00886	10.1951	0.981139	112.867	10.1951	0.099	2.00866	56.86	10.1951	1604.5	2.00866	0.0354378		18KH1_101	0.206751	17.2268	1.70259	3.76368	32.5	12.7886	109.548	231.579	345.528	575.092	956.25	1384.62	2086.96	2504.07	1380.2	0.214329	0.0524916
35	18KH1_102	674	65.31	0.0968991	1.60038	3.76479	0.1273	3.40719	0.905015	7.85546	3.40719	0.09122	1.60147	772.4	3.40719	1450.3	1.60147	0.532579		18KH1_102	0.919831	8.49918	2.32759	2.27571	9.93243	1.34991	37.1357	95.5679	153.252	259.89	426.875	663.968	1099.38	1353.66	1380.2	0.0702881	0.0337788
35	18KH1_103	916.9	127.4	0.138946	2.19847	3.42925	0.1705	3.0441	0.887688	5.8651	3.04411	0.09356	1.57898	1014.9	3.04411	1498.4	1.57898	0.677322		18KH1_103	0.590717	12.7406	2.90948	5.01094	25.1351	12.4334	86.4322	201.385	305.691	505.495	806.25	1198.38	1931.68	2304.88	1318.4	0.266754	0.0447446
35	18KH1_104	801	623	0.777778	1.29054	5.69473	0.1007	5.47208	0.960902	9.93049	5.47208	0.09299	1.5768	618.5	5.47208	1486.8	1.5768	0.415994		18KH1_104	2.78481	71.4519	7.97414	8.09628	31.8919	8.13499	137.186	368.421	646.341	1206.96	2037.5	2991.9	4565.22	5243.9	1339	0.122988	0.0300503
35	18KH1_105	253.6	189.2	0.746057	2.11951	3.21042	0.167	2.81139	0.87571	5.98802	2.81139	0.09209	1.55011	995.6	2.81139	1468.4	1.55011	0.678017		18KH1_105	0.0582278	9.1354	2.62931	6.67396	44.7973	20.7815	189.447	423.823	666.667	1153.85	1875	2493.93	3459.63	3963.41	891.98	0.225584	0.0547594
35	18KH1_106	287.2	65.3	0.227368	1.41148	4.54214	0.1184	4.08698	0.899793	8.44595	4.08698	0.0865	1.98181	721.3	4.08698	1348.5	1.98181	0.534891		18KH1_106	0.00970464	7.83034	0.420259	2.07877	21.1486	2.22025	57.7387	103.878	139.024	234.432	378.125	651.822	1099.38	1434.96	1514.1	0.063537	0.0525194
35	18KH1_108	535	441	0.824299	2.67115	3.62441	0.2001	3.21674	0.887523	4.9975	3.21674	0.09686	1.66999	1175.9	3.21674	1563.7	1.66999	0.751998		18KH1_108	0.0620253	51.3866	0.625	1.48796	15.7432	5.9325	50.2513	106.925	180.081	391.941	787.5	1380.57	2490.68	3443.09	1411.1	0.21092	0.0201757
35	18KH1_109	1039	358.4	0.344947	0.462457	5.07488	0.036	4.75932	0.937818	27.7778	4.75932	0.09321	1.76163	227.99	4.75932	1491.3	1.76163	0.15288		18KH1_109	0.0886076	29.3638	1.32543	3.08534	31.6216	4.79574	144.724	324.1	495.122	873.626	1462.5	2016.19	3024.84	3373.98	1010.43	0.0708914	0.047845
35	18KH1_11	459	196.7	0.42854	2.61066	5.38623	0.2098	5.07877	0.942916	4.76644	5.07877	0.09029	1.79378	1227.8	5.07877	1430.8	1.79378	0.858121		18KH1_11	0.0341772	1.37031	2.74784	11.488	89.8649	0.248668	136.181	112.188	71.9512	44.5055	26.125	19.4737	19.5652	20.0407	1761.3	0.00224785	6.96036
35	18KH1_110	576.5	262.7	0.455681	2.70444	3.20539	0.2118	2.77806	0.866684	4.72143	2.77806	0.09265	1.59903	1238.4	2.77806	1479.9	1.59903	0.836813		18KH1_110	0.0172996	12.447	1.02371	3.80744	35.4054	3.48135	108.04	178.393	276.829	509.158	800.625	1121.46	1757.76	2231.71	1493.5	0.0562886	0.0614646
35	18KH1_111	804	215.4	0.26791	1.69634	4.46752	0.1348	4.17693	0.934954	7.4184	4.17693	0.09131	1.58493	815.2	4.17693	1452.2	1.58493	0.561355		18KH1_111	0.21519	34.2577	0.625	2.10066	20.0676	6.51865	82.4121	153.463	254.878	470.696	733.125	1105.26	1850.93	2495.93	1761.3	0.160293	0.0445246
35	18KH1_113	598	41.75	0.0698161	0.442228	6.5074	0.0376	6.28689	0.966113	26.5957	6.28689	0.08534	1.67968	237.94	6.28689	1322.4	1.67968	0.17993		18KH1_113	0.0801688	6.39478	0.721983	1.46608	10.5405	5.5595	48.7437	113.85	214.228	369.963	598.75	939.271	1596.27	2166.67	1699.5	0.24527	0.0305359
35	18KH1_114	477.9	382.6	0.800586	2.14764	5.51029	0.1733	5.26106	0.95477	5.77034	5.26106	0.08992	1.63845	1030.3	5.26106	1423	1.63845	0.724034		18KH1_114	0.092827	1.56607	1.85345	5.44858	45.4054	0.905861	66.3317	61.4958	58.1301	62.4542	73.125	78.9474	78.882	102.033	1751	0.0165062	0.840897
35	18KH1_116	450	123.1	0.273556	0.260862	10.7787	0.0224	10.5223	0.976212	44.6429	10.5223	0.0845	2.337	142.81	10.5223	1303.2	2.337	0.109584		18KH1_116	0.021519	2.72431	1.47629	5.75492	29.8649	1.74067	58.794	86.1496	121.951	190.476	276.875	376.518	689.441	943.089	1648	0.0415404	0.0852777
35	18KH1_12	521	70.9	0.136084	0.766422	4.38117	0.0599	4.05441	0.925418	16.6945	4.05441	0.09284	1.66023	375.02	4.05441	1483.8	1.66023	0.252743		18KH1_12	0.00632911	1.25612	0.398707	2.38512	25	0.728242	73.3668	78.1163	46.3415	28.2051	14.125	10.8097	9.75155	8.04878	2080.6	0.0170042	7.52361
35	18KH1_13	735	28.31	0.038517	1.22615	3.97887	0.1035	3.62503	0.91107	9.66184	3.62503	0.08596	1.64029	634.9	3.62503	1336.4	1.64029	0.475082		18KH1_13	0.00295359	0.649266	0.290948	0.612691	7.7027	0.976909	47.2362	138.504	250.813	368.132	546.25	732.794	1204.97	1569.11	1771.6	0.0512148	0.0392012
35	18KH1_14	147.2	16.11	0.109443	0.0143489	14.3318	0.00165	2.93186	0.20457	606.061	2.93186	0.0631	14.0287	10.63	2.93186	711	14.0287	0.0149508		18KH1_14	0.156118	12.2186	5.10776	14.8359	48.1757	3.09059	53.2663	61.2188	55.2846	55.1282	47.1875	44.9393	51.5528	50	1617.1	0.0610099	1.03324
35	18KH1_18	211.1	234.2	1.10943	0.0138547	12.7871	0.00143	8.7011	0.68046	699.301	8.7011	0.0703	9.37019	9.21	8.7011	936.2	9.37019	0.00983764		18KH1_18	0.0151899	4.0783	2.72629	9.47484	40.8108	4.70693	55.7789	57.8947	51.626	49.2674	52.3125	53.4413	61.4907	46.3415	2245.4	0.098654	0.907111
35	18KH1_19	357.8	61.23	0.171129	3.17359	3.46479	0.2372	3.06349	0.884178	4.21585	3.06349	0.09708	1.61858	1372.1	3.06349	1567.9	1.61858	0.87512		18KH1_19	0.00843882	9.77162	0.247845	1.05033	7.36486	5.66607	35.3266	101.108	184.959	309.524	479.375	744.939	1248.45	1512.2	1421.4	0.351276	0.0282965
35	18KH1_2	359.3	286.2	0.796549	0.29436	6.72776	0.0269	6.37716	0.947888	37.1747	6.37716	0.0794	2.14349	171.12	6.37716	1181.2	2.14349	0.14487		18KH1_2	0.472574	4.25775	4.74138	15.0328	68.2432	1.2611	87.4372	91.9668	98.7805	120.879	150.625	191.498	329.814	386.179	1658.3	0.0163257	0.265111
35	18KH1_20	206.1	22.94	0.111305	0.0111098	13.7674	0.001182	5.96076	0.432961	846.024	5.96076	0.0682	12.4102	7.62	5.96076	874	12.4102	0.00871854		18KH1_20	0.0464135	9.05383	5.94828	26.477	151.351	4.79574	203.015	188.366	150.407	142.125	139.375	136.842	159.006	146.341	1668.6	0.0273589	1.27677
35	18KH1_21	619	229.7	0.371082	0.451904	5.73483	0.0366	5.42928	0.946719	27.3224	5.42928	0.08959	1.84696	231.72	5.42928	1415.9	1.84696	0.163656		18KH1_21	0.616034	15.1713	0.581897	2.47265	20.6081	4.92007	57.7889	112.188	186.585	271.062	506.25	736.842	1279.5	1727.64	1318.4	0.142571	0.0451651
35	18KH1_22	609	300.2	0.492939	0.948803	3.66038	0.0732	3.17296	0.866839	13.6612	3.17296	0.09405	1.82502	455.41	3.17296	1508.3	1.82502	0.301936		18KH1_22	0.594937	9.95106	0.700431	3.19475	34.4595	8.47247	124.121	257.895	491.463	732.601	1268.75	1696.36	2515.53	2987.8	1030	0.129549	0.0493418
35	18KH1_23	580.7	362.8	0.624763	0.937795	5.49745	0.0708	5.1976	0.945457	14.1243	5.1976	0.09611	1.79078	441	5.1976	1549.1	1.79078	0.284681		18KH1_23	9.62025	12.5938	2.4569	4.68271	39.5946	4.45826	144.724	280.886	528.455	816.85	1393.75	1732.79	2645.96	3097.56	1380.2	0.0588949	0.054696
35	18KH1_24	626.3	605	0.965991	1.7321	3.06636	0.1327	2.63271	0.858579	7.5358	2.63271	0.09471	1.57206	803.25	2.63271	1521.5	1.57206	0.527933		18KH1_24	194.093	97.8793	39.8707	40.4814	102.027	31.4387	366.834	795.014	1532.52	2490.84	4387.5	5708.5	8571.43	9634.15	1153.6	0.162507	0.0427973
35	18KH1_25	890	176.1	0.197865	1.73915	2.98465	0.1423	2.47479	0.829172	7.02741	2.47479	0.08868	1.6684	857.66	2.47479	1396.4	1.6684	0.614194		18KH1_25	0.801688	6.73736	0.431034	1.09409	17.0946	2.84192	64.3216	123.823	168.699	227.106	430	643.725	1260.87	1686.99	1637.7	0.0857045	0.0510137
35	18KH1_26	344.5	507.7	1.47373	0.0104569	11.4697	0.00125	8.32406	0.725742	800	8.32406	0.0607	7.89078	8.05	8.32406	627.7	7.89078	0.0128246		18KH1_26	0.852321	3.26264	2.52155	7.50547	35.5405	3.51687	38.8945	41.5512	33.8618	27.6557	31.4375	27.085	34.0373	26.3008	1411.1	0.0945912	1.1427
35	18KH1_28	345	223.1	0.646667	1.68508	5.14369	0.1315	4.83997	0.940952	7.60456	4.83997	0.09298	1.74135	796.4	4.83997	1486.6	1.74135	0.535719		18KH1_28	0.202532	1.07667	1.30388	6.47702	56.4189	0.284192	82.9146	80.0554	73.5772	64.1026	65.625	61.1336	81.3665	70.3252	1534.7	0.00415512	1.01903
35	18KH1_29	248.8	82.4	0.33119	1.80146	4.4218	0.1401	3.55624	0.804251	7.13776	3.55624	0.0933	2.62784	845.2	3.55624	1493.1	2.62784	0.566071		18KH1_29	0.0421941	12.8222	0.387931	1.4442	21.2162	3.73002	75.8794	154.017	295.122	448.718	781.25	1008.1	1621.12	1939.02	1023.82	0.092964	0.0468068
35	18KH1_3	324.6	140.1	0.431608	2.4316	3.7228	0.1923	3.35613	0.901507	5.20021	3.35613	0.09175	1.61109	1133.8	3.35613	1461.4	1.61109	0.775831		18KH1_3	0.295359	15.6607	1.23922	3.04158	11.8919	3.9254	29.8492	60.6648	117.073	241.758	433.75	732.794	1403.73	2012.2	2327.8	0.208349	0.0212643
35	18KH1_30	307.7	113.1	0.367566	0.839056	4.09941	0.0716	3.72723	0.909212	13.9665	3.72723	0.08503	1.70672	445.79	3.72723	1315.4	1.70672	0.338901		18KH1_30	0.189873	2.13703	0.991379	4.55142	44.4595	1.47425	83.9196	134.072	140.244	136.081	160.625	161.943	177.64	183.333	1895.2	0.0241355	0.472415
35	18KH1_31	568	273.8	0.482042	1.20715	5.14043	0.0946	4.8134	0.93638	10.5708	4.8134	0.09259	1.80423	582.7	4.8134	1478.7	1.80423	0.394062		18KH1_31	0.476793	30.0163	0.646552	2.31947	25.1351	19.3606	85.4271	152.909	273.171	419.414	756.25	983.806	1608.7	1922.76	1091.8	0.417811	0.0531034
35	18KH1_32	323.3	346.1	1.07052	1.91893	3.30873	0.1477	2.89633	0.87536	6.77048	2.89633	0.09427	1.59968	888.1	2.89633	1512.7	1.59968	0.587096		18KH1_32	0.0421941	43.5563	0.162716	1.07221	16.8243	5.38188	58.794	134.349	271.138	490.842	1006.25	1473.68	2403.73	3101.63	1215.4	0.171119	0.0244595
35	18KH1_33	291.5	64.54	0.221407	0.838139	8.77397	0.0677	8.5856	0.97853	14.7711	8.5856	0.08983	1.80833	422.3	8.5856	1421.1	1.80833	0.297164		18KH1_33	0.21097	1.11093	0.786638	2.31947	36.4189	0.248668	67.3367	62.3269	40.0813	23.8095	22.5625	18.0567	18.6957	22.2358	1205.1	0.00502146	3.60173
35	18KH1_34	879	143.7	0.163481	0.00424347	9.06342	0.000566	3.3776	0.372663	1766.78	3.3776	0.0544	8.41055	3.648	3.3776	386.6	8.41055	0.00943611		18KH1_34	0.71308	6.81892	1.75647	6.43326	47.5676	5.80817	66.8342	102.493	171.545	274.725	610.625	1113.36	2018.63	2695.12	1802.5	0.103011	0.0331086
35	18KH1_35	415	378.3	0.911566	0.565938	3.27167	0.04544	2.74398	0.83871	22.007	2.74398	0.09037	1.78168	286.46	2.74398	1432.5	1.78168	0.199972		18KH1_35	57.384	32.7896	13.5776	14.442	62.1622	13.6767	233.166	523.546	1024.39	1626.37	2868.75	3736.84	5546.58	6422.76	1004.25	0.113602	0.0420377
35	18KH1_36	865.6	235.3	0.271835	0.404763	6.10668	0.0372	5.84766	0.957583	26.8817	5.84766	0.07895	1.75969	235.45	5.84766	1170	1.75969	0.201239		18KH1_36	0.0632911	0.995106	0.872845	4.42013	38.8514	0.373002	104.02	196.953	329.268	441.392	618.75	651.822	900.621	882.114	1967.3	0.00586745	0.115498
35	18KH1_37	284.2	257.9	0.90746	1.99756	8.15168	0.17	7.98546	0.979609	5.88235	7.98546	0.08526	1.6378	1012.1	7.98546	1320.6	1.6378	0.766394		18KH1_37	-0.00105907	2.3491	1.31466	4.9453	33.5135	0.461812	41.2563	44.3213	43.4959	30.9524	32.9375	31.9838	36.8944	35.4472	1637.7	0.0124197	1.11823
35	18KH1_39	373	60.9	0.163271	0.213204	10.2395	0.0175	9.98285	0.974937	57.1429	9.98285	0.0884	2.27808	111.84	9.98285	1390.3	2.27808	0.0804431		18KH1_39	0.565401	3.84992	1.47629	4.83589	36.1486	2.43339	65.8291	91.4127	127.642	161.905	296.875	473.684	913.043	1239.84	1627.4	0.0498835	0.0720986
35	18KH1_4	588.4	49.4	0.0839565	0.248863	6.58298	0.0226	6.19499	0.941063	44.2478	6.19499	0.0799	2.22658	144.07	6.19499	1193.6	2.22658	0.120702		18KH1_4	0.00886076	0.831974	0.387931	1.37856	13.5135	0.959147	59.799	170.914	298.78	445.055	590	740.891	1093.17	1191.06	1884.9	0.0337407	0.0547025
35	18KH1_40	440.1	78.5	0.178369	1.63271	4.53907	0.1368	4.19541	0.92429	7.30994	4.19541	0.0866	1.73252	826.5	4.19541	1350.7	1.73252	0.611905		18KH1_40	0.109705	1.2398	0.775862	4.26696	64.527	1.10124	136.683	110.803	67.8862	36.2637	31.875	22.7126	21.9255	23.2927	1225.7	0.0117261	6.234
35	18KH1_41	218.1	175.6	0.805135	3.37564	4.15653	0.2676	3.83142	0.921783	3.73692	3.83142	0.09153	1.61152	1528.6	3.83142	1456.8	1.61152	1.04929		18KH1_41	0.122363	0.995106	1.40086	7.87746	68.3108	0.53286	123.116	118.56	91.4634	65.3846	47.875	36.8421	36.8944	26.9919	1302.95	0.00581047	3.33697
35	18KH1_42	281.8	356.2	1.26402	1.16922	5.69859	0.1004	5.30535	0.930994	9.96016	5.30535	0.0845	2.08018	616.8	5.30535	1303.2	2.08018	0.473297		18KH1_42	0.312236	2.90375	1.13147	5.71116	32.5676	0.497336	38.1407	48.4765	51.626	57.1429	71.25	89.0688	124.845	142.276	1575.9	0.0141112	0.305505
35	18KH1_43	215.3	175.1	0.813284	3.31574	3.3166	0.2557	2.91999	0.880416	3.91083	2.91999	0.09409	1.57274	1467.8	2.91999	1509.1	1.57274	0.972633		18KH1_43	0.367089	65.7423	0.420259	2.42888	22.9054	12.7709	65.8291	124.654	241.463	448.718	762.5	1174.09	1906.83	2569.11	971.29	0.328884	0.0345228
35	18KH1_44	155.4	104.9	0.675032	2.91601	3.57495	0.2269	3.15494	0.882512	4.40723	3.15494	0.09325	1.68126	1318.2	3.15494	1492.1	1.68126	0.883453		18KH1_44	0.0970464	19.0865	1.33621	7.43982	41.5541	25.7549	136.683	290.028	534.959	994.505	1668.75	2319.84	3260.87	4008.13	966.14	0.341739	0.0419162
35	18KH1_45	202.1	185.4	0.917368	2.07822	4.16377	0.1789	3.83948	0.922115	5.58971	3.83948	0.08429	1.61103	1061	3.83948	1298.4	1.61103	0.81716		18KH1_45	0.0970464	2.67537	1.61638	8.62144	51.0135	0.301954	72.3618	92.2438	83.7398	81.1355	75.625	78.5425	77.6398	74.7967	1802.5	0.00496985	0.93202
35	18KH1_46	758	71.1	0.0937995	2.16471	3.49127	0.1701	3.08606	0.883937	5.87889	3.08606	0.09234	1.63253	1012.7	3.08606	1473.5	1.63253	0.687275		18KH1_46	0.139241	4.77977	0.398707	3.15098	31.9595	2.22025	122.613	190.028	278.455	415.751	628.75	829.96	1267.08	1491.87	1637.7	0.0354677	0.0967682
35	18KH1_47	352.4	33.5	0.0950624	2.51399	3.40877	0.1968	3.00306	0.880979	5.0813	3.00306	0.09269	1.61288	1158.1	3.00306	1480.7	1.61288	0.78213		18KH1_47	1.60338	9.83687	0.711207	2.36324	9.72973	9.05861	38.191	97.7839	213.415	366.3	643.125	1024.29	1745.34	2260.16	1472.9	0.469928	0.0218817
35	18KH1_59	711	208	0.292546	0.961298	6.7044	0.0806	6.49994	0.969504	12.407	6.49993	0.08654	1.6431	499.7	6.49993	1349.4	1.6431	0.370313		18KH1_59	1.22363	2.92007	1.93966	11.9912	142.568	2.53996	290.452	240.72	141.463	73.0769	43.3125	26.5587	30.8075	24.7967	1596.5	0.0124819	9.42799
35	18KH1_6	191	42.6	0.223037	0.168119	8.21992	0.0162	7.75627	0.943595	61.7284	7.75627	0.0753	2.72164	103.6	7.75627	1075.6	2.72164	0.0963183		18KH1_6	0.0472574	6.21533	3.18966	11.5974	56.7568	4.86679	77.3869	85.0416	94.7154	126.374	160.625	222.672	316.77	378.049	1998.2	0.0734344	0.2443
35	18KH1_60	584	13.4	0.0229452	2.62044	5.05998	0.2119	4.78861	0.94637	4.71921	4.78861	0.08973	1.6348	1238.9	4.78861	1418.9	1.6348	0.873141		18KH1_60	-0.00113924	0.570962	0.141164	0.238512	8.71622	1.38544	49.7487	134.349	238.618	397.436	637.5	959.514	1739.13	2154.47	1802.5	0.0665321	0.0286055
35	18KH1_61	374.5	170.6	0.455541	1.57865	3.67015	0.1212	3.20199	0.872442	8.25083	3.20199	0.09451	1.79367	737.5	3.20199	1517.5	1.79367	0.485997		18KH1_61	9.2827	34.4209	3.125	6.41138	33.9189	16.8739	118.593	283.38	552.846	1031.14	1868.75	2688.26	4037.27	5154.47	1236	0.266051	0.0293746
35	18KH1_62	500	202	0.404	1.0705	9.33353	0.0688	9.01913	0.966314	14.5349	9.01913	0.1129	2.40212	428.9	9.01913	1845.8	2.40212	0.232365		18KH1_62	1.26582	44.8613	1.32543	4.59519	30.473	26.8206	110.05	206.094	347.967	611.722	950	1404.86	2217.39	2792.68	1034.12	0.463144	0.0496305
35	18KH1_63	398.8	222.2	0.557172	2.27228	7.67117	0.196	7.50403	0.978211	5.10204	7.50403	0.08412	1.59264	1153.8	7.50403	1294.5	1.59264	0.891309		18KH1_63	0.109705	1.45188	0.743534	4.83589	26.2162	0.728242	33.8693	40.1662	45.5285	50.7326	56.3125	57.085	72.0497	69.1057	1833.4	0.0244392	0.470083
35	18KH1_64	577	254.9	0.441768	2.60813	3.99042	0.1975	3.65099	0.91494	5.06329	3.65099	0.09582	1.61049	1161.9	3.65099	1543.4	1.61049	0.752818		18KH1_64	0.801688	25.6117	0.258621	1.81619	19.6622	8.43694	60.3015	131.025	264.228	501.832	937.5	1489.88	2534.16	3434.96	1339	0.245022	0.0237954
35	18KH1_65	412	60.3	0.146359	0.581712	5.72607	0.0482	5.48479	0.957864	20.7469	5.48479	0.08757	1.64465	303.46	5.48479	1372.2	1.64465	0.221149		18KH1_65	0.506329	7.17781	0.657328	2.05689	14.8649	3.51687	43.7186	101.385	203.252	358.974	625	975.709	1776.4	2276.42	1174.2	0.137957	0.0246108
35	18KH1_66	425.5	122.4	0.287662	2.03205	4.47636	0.1682	4.19454	0.937042	5.9453	4.19454	0.08766	1.56322	1002.2	4.19454	1374.2	1.56322	0.729297		18KH1_66	0.772152	17.9445	0.452586	1.55361	19.0541	1.08348	63.8191	140.72	281.301	532.967	912.5	1170.04	1751.55	2040.65	1431.7	0.0310708	0.0364357
35	18KH1_68	452.6	233.3	0.515466	0.0121363	14.1032	0.0014	11.6577	0.826603	714.286	11.6577	0.0629	7.93705	9.02	11.6577	703.9	7.93705	0.0128143		18KH1_68	0.805907	8.84176	1.77802	6.98031	36.4189	4.6714	67.8392	91.6898	134.553	250.916	421.875	639.676	1037.27	1341.46	1225.7	0.0939817	0.0654019
35	18KH1_69	1110	256	0.230631	0.301524	11.6188	0.0258	11.4732	0.987466	38.7597	11.4732	0.0848	1.83384	164.21	11.4732	1310.1	1.83384	0.125342		18KH1_69	27.0042	14.1925	8.29741	11.5974	31.9595	4.77798	92.9648	183.38	332.114	608.059	1018.75	1615.38	2801.24	3650.41	1503.8	0.0876566	0.033187
35	18KH1_7	386.7	316.2	0.817688	1.93374	4.02639	0.1593	3.64278	0.904725	6.27746	3.64278	0.08808	1.71523	952.9	3.64278	1383.4	1.71523	0.68881		18KH1_7	0.0291139	2.23491	1.78879	8.16193	47.4324	0.728242	59.799	56.5097	49.187	41.0256	35.0625	33.6032	44.4099	42.2764	1668.6	0.0136739	1.34652
35	18KH1_70	1170	164.8	0.140855	0.195216	7.66737	0.0156	7.41691	0.967334	64.1026	7.41691	0.0908	1.94371	99.79	7.41691	1441.6	1.94371	0.0692217		18KH1_70	0.0510549	2.67537	0.592672	1.88184	11.3514	1.72291	48.7437	116.898	221.545	459.707	906.25	1615.38	3055.9	4121.95	1967.3	0.0732454	0.0159507
35	18KH1_71	330.5	105.27	0.318517	0.32549	7.44039	0.0263	7.22023	0.970411	38.0228	7.22024	0.0898	1.79654	167.35	7.22024	1420.4	1.79654	0.117819		18KH1_71	0.417722	35.0734	0.840517	2.12254	13.6486	6.5897	72.8643	164.266	319.512	637.363	1087.5	1619.43	2546.58	3154.47	1359.6	0.20896	0.0286126
35	18KH1_72	518	380.4	0.734363	2.11621	3.16246	0.1583	2.75474	0.871076	6.31712	2.75474	0.097	1.55323	947.3	2.75474	1566.4	1.55323	0.604763		18KH1_72	0.0843882	51.0604	1.61638	5.73304	33.8514	33.3925	163.317	263.989	418.293	723.443	1075	1372.47	2118.01	2292.68	989.83	0.449103	0.0771084
35	18KH1_73	963	880	0.913811	1.69273	3.26573	0.1304	2.85243	0.873444	7.66871	2.85243	0.09419	1.59016	790.1	2.85243	1511.1	1.59016	0.522864		18KH1_73	0.064557	72.1044	0.299569	1.57549	11.7568	12.2558	75.8794	127.424	225.61	430.403	756.25	1085.02	1956.52	2593.5	1153.6	0.410332	0.0387828
35	18KH1_75	470.8	301	0.639337	1.1945	3.83488	0.0946	3.50341	0.913566	10.5708	3.50341	0.09162	1.55961	582.69	3.50341	1458.7	1.55961	0.399458		18KH1_75	5.27426	43.23	9.05172	8.97155	38.6486	5.63055	240.704	440.443	825.203	1503.66	2306.25	3206.48	4763.98	5487.8	1277.2	0.0583771	0.0505258
35	18KH1_76	351	132.7	0.378063	3.95478	3.3539	0.2871	2.94922	0.879341	3.48311	2.94922	0.09995	1.5971	1627	2.94922	1622.3	1.5971	1.0029		18KH1_76	1.72996	20.5546	3.14655	7.02407	40.5405	37.6554	174.874	251.801	389.431	615.385	850	1056.68	1527.95	1723.58	935.24	0.447218	0.11445
35	18KH1_78	643.1	712.1	1.10729	1.1455	4.5713	0.0883	4.29225	0.938956	11.325	4.29225	0.09413	1.5727	545.5	4.29225	1509.9	1.5727	0.361282		18KH1_78	17.2996	97.2268	25.6466	28.0088	46.2838	19.5382	187.437	318.56	512.195	906.593	1356.25	1757.09	2583.85	3105.69	903.31	0.209769	0.0725418
35	18KH1_79	741.7	200.1	0.269786	0.519316	5.19177	0.0416	4.90023	0.943846	24.0385	4.90023	0.09058	1.71529	262.74	4.90023	1436.9	1.71529	0.182852		18KH1_79	0.0886076	8.5155	1.03448	4.04814	25.473	8.65009	134.673	255.956	484.553	873.626	1418.75	2040.49	3211.18	3987.8	1503.8	0.147686	0.0419389
35	18KH1_8	143	106.1	0.741958	0.372224	5.7176	0.0317	5.26123	0.92018	31.5457	5.26123	0.0852	2.23841	201.18	5.26123	1319.2	2.23841	0.152502		18KH1_8	0.0198312	4.79608	2.15517	8.27133	40.3378	2.2913	58.2915	65.374	79.2683	85.5311	79.375	72.4696	83.2298	62.1951	1369.9	0.0472523	0.700368
35	18KH1_80	633	318	0.50237	0.661611	5.39581	0.0523	5.13304	0.951302	19.1205	5.13304	0.09179	1.66332	328.63	5.13304	1462.2	1.66332	0.22475		18KH1_80	4.2616	23.8173	6.57328	10.9409	38.1081	2.77087	141.709	216.898	364.634	633.7	1006.25	1384.62	2043.48	2329.27	1565.6	0.0377059	0.0693467
35	18KH1_81	1091	71.2	0.0652612	0.0334178	11.6262	0.00342	11.0605	0.951342	292.398	11.0605	0.0709	3.58245	22.01	11.0605	953.6	3.58245	0.023081		18KH1_81	0.248945	2.03915	0.980603	2.42888	16.8919	1.17229	102.513	228.809	346.748	468.864	595.625	668.016	931.677	991.87	1720.1	0.0281714	0.11003
35	18KH1_82	186	123.4	0.663441	0.985455	4.83649	0.0746	4.51684	0.93391	13.4048	4.51684	0.09585	1.72908	463.8	4.51684	1544	1.72908	0.300389		18KH1_82	0.0185654	60.0326	0.926724	3.96061	28.0405	24.5115	146.734	250.139	453.659	815.018	1287.5	1724.7	2658.39	3150.41	835.33	0.382131	0.0551965
35	18KH1_83	1077	607	0.563603	2.23824	3.34313	0.168	2.94871	0.882021	5.95238	2.94871	0.09667	1.57531	1001.1	2.94871	1560	1.57531	0.641731		18KH1_83	0.0405063	40.2936	1.99353	7.17724	42.0946	26.8206	179.397	305.54	428.455	657.509	943.75	1242.91	1881.99	2321.14	1109.31	0.308637	0.0953232
35	18KH1_84	1244	15.96	0.0128296	1.75859	6.06796	0.1431	5.8518	0.964378	6.98812	5.8518	0.08917	1.60515	862.2	5.8518	1407	1.60515	0.612793		18KH1_84	16.8776	27.7325	24.7845	29.3217	19.3919	2.23801	91.4573	247.922	514.228	1012.82	1843.75	3080.97	4720.5	7195.12	1957	0.0531426	0.0193745
35	18KH1_85	831.5	587	0.705953	0.0970454	7.63048	0.00802	7.35159	0.96345	124.688	7.35159	0.0878	2.04411	51.49	7.35159	1377.2	2.04411	0.0373875		18KH1_85	1.22363	40.9462	1.05603	3.52298	15.3378	3.1794	45.4271	80.0554	144.309	311.355	598.125	1117.41	2254.66	3207.32	1487.32	0.120449	0.0201481
35	18KH1_86	363	74	0.203857	0.768458	5.76102	0.0658	5.51745	0.957721	15.1976	5.51745	0.08474	1.65744	410.8	5.51745	1308.7	1.65744	0.313899		18KH1_86	0.0109705	1.23165	0.711207	3.91685	36.2838	0.639432	87.4372	71.4681	49.187	43.2234	40.0625	39.6761	46.2112	39.8374	1575.9	0.0113525	1.89212
35	18KH1_87	110	2.99	0.0271818	0.0595159	13.1405	0.00636	11.8604	0.902582	157.233	11.8604	0.0679	5.65721	40.87	11.8604	864.6	5.65721	0.0472704		18KH1_87	0.0261603	4.89396	1.07759	4.5733	23.1081	1.66963	52.7638	52.3546	49.1463	54.2125	56.8125	52.6316	66.2733	62.1951	1339	0.0478155	0.796155
35	18KH1_88	488	101.7	0.208402	3.21561	4.27597	0.2555	3.98032	0.930858	3.91389	3.98032	0.09132	1.56237	1466.8	3.98032	1452.4	1.56237	1.00991		18KH1_88	0.0156118	13.3279	0.128233	0.919037	9.66216	2.34458	68.8442	142.382	245.528	424.908	666.25	886.64	1478.26	1662.6	1431.7	0.0909064	0.0465711
35	18KH1_89	172.8	67.2	0.388889	3.82027	3.32418	0.2731	2.78731	0.838496	3.66166	2.78731	0.1015	1.81137	1556.5	2.78731	1650.9	1.81137	0.942819		18KH1_89	0.0244726	8.10767	0.165948	0.678337	3.31081	1.68739	18.9447	44.0443	84.9593	151.465	268.75	381.377	627.95	743.902	1102.1	0.213061	0.0301691
35	18KH1_9	308.3	203.4	0.659747	0.526355	7.13638	0.0434	6.41712	0.899213	23.0415	6.41713	0.088	3.12225	273.87	6.41713	1381.6	3.12225	0.198227		18KH1_9	0.421941	102.773	2.80172	6.82713	50.6757	22.7353	173.869	335.18	650.407	1128.21	1656.25	2234.82	3366.46	3861.79	1390.5	0.242209	0.0516475
35	18KH1_90	495	197.4	0.398788	0.601263	6.31778	0.0479	6.08793	0.963618	20.8768	6.08793	0.09108	1.68865	301.62	6.08793	1447.4	1.68865	0.208387		18KH1_90	0.970464	16.9657	3.66379	4.66083	45.2027	10.4796	140.201	310.526	487.805	809.524	1281.25	1663.97	2565.22	2922.76	1085.62	0.131639	0.0546546
35	18KH1_91	417.5	52.13	0.124862	2.65706	4.28926	0.2117	3.98914	0.93003	4.72367	3.98914	0.09107	1.57623	1237.9	3.98914	1447.2	1.57623	0.855376		18KH1_91	0.00464135	0.760196	0.862069	2.86652	31.3514	0.373002	71.8593	76.4543	47.561	29.1209	22.6875	17.6518	19.6894	18.4146	1648	0.00785853	3.64964
35	18KH1_92	87.63	48.5	0.553463	3.0442	3.9878	0.2276	3.63278	0.910973	4.39367	3.63278	0.09705	1.64483	1321.9	3.63278	1567.3	1.64483	0.843425		18KH1_92	-0.000214346	9.55954	0.549569	0.897155	6.95946	8.27709	22.9648	49.0305	78.0488	156.96	294.375	514.17	913.043	1410.57	768.38	0.654724	0.025152
35	18KH1_93	328.4	178.5	0.543544	0.0393852	11.3404	0.00339	10.5776	0.932733	294.985	10.5776	0.0843	4.08898	21.82	10.5776	1298.6	4.08898	0.0168027		18KH1_93	0.0607595	13.279	1.21767	3.6105	22.9054	9.59147	75.8794	160.665	263.821	509.158	912.5	1340.08	2093.17	2642.28	917.73	0.230067	0.036251
35	18KH1_94	546	257.7	0.471978	1.18823	3.93464	0.0911	3.58062	0.910026	10.977	3.58062	0.09464	1.63111	562.04	3.58062	1520.1	1.63111	0.369739		18KH1_94	0.0675105	50.8972	1.19612	2.60394	30.9459	14.7425	123.618	310.249	540.65	1043.96	1843.75	2704.45	4198.76	5121.95	1606.8	0.238356	0.0294416
35	18KH1_95	317.8	164	0.516048	3.2712	3.21739	0.2358	2.67052	0.830025	4.24088	2.67052	0.10066	1.79442	1364.8	2.67052	1635.5	1.79442	0.834485		18KH1_95	0.185654	30.3426	5.29095	9.54048	55.2703	36.4121	159.296	280.055	369.512	575.092	819.375	1113.36	1552.8	1837.4	820.91	0.388058	0.102587
35	18KH1_96	300.2	347.4	1.15723	1.05066	4.60417	0.0913	4.28419	0.930502	10.9529	4.28419	0.0835	1.68644	563.2	4.28419	1280.1	1.68644	0.439966		18KH1_96	0.113924	2.18597	2.40302	6.3895	40.9459	0.728242	46.1307	60.1108	58.5366	69.9634	90.625	103.644	117.391	139.837	1802.5	0.0167562	0.392965
35	18KH1_97	221.9	166.7	0.751239	2.68871	3.77835	0.202	3.41531	0.903917	4.9505	3.41531	0.09658	1.61603	1186.1	3.41531	1558.2	1.61603	0.761199		18KH1_97	3.20675	15.8238	8.18966	8.14004	39.2568	17.0515	127.638	270.637	437.398	745.421	1225	1595.14	2385.09	2845.53	1045.45	0.240888	0.053515
35	18KH1_98	3291	52	0.0158007	1.62742	4.613	0.1316	4.31204	0.934758	7.59878	4.31204	0.08973	1.63893	797	4.31204	1418.9	1.63893	0.561703		18KH1_98	0.189873	1.031	1.18534	1.99125	28.4459	1.93606	172.864	518.006	869.919	1406.59	2212.5	2842.11	3925.47	4174.8	1926.1	0.0276093	0.0440366
35	18KH1_99	600	320	0.533333	2.29189	3.58525	0.1659	3.20376	0.893594	6.02773	3.20376	0.10024	1.60933	989.5	3.20376	1627.7	1.60933	0.607913		18KH1_99	0.548523	27.8956	2.79095	5.20788	33.6486	10.6572	129.648	279.778	487.805	820.513	1362.5	1959.51	3049.69	3349.59	1147.42	0.161353	0.0425119
12	18KH1-10	691	83	0.120116	1.02911	10.2329	0.0743	9.95965	0.973294	13.4589	9.95965	0.1005	2.34909	462	9.95965	1632.5	2.34909	0.283002		18KH1-10	0.00379747	1.07667	0.592672	2.34136	37.2297	0.26643	89.9497	103.878	73.5772	55.4945	37.125	28.4211	28.3851	26.0569	1720.1	0.00460403	3.16891
12	18KH1-100	425	71.2	0.167529	0.435804	7.32373	0.0323	6.89639	0.941649	30.9597	6.89639	0.0979	2.46514	204.93	6.89639	1583.7	2.46514	0.1294		18KH1-100	0.0299578	1.04405	0.452586	1.55361	32.027	1.06572	124.623	144.598	95.122	69.2308	54.0625	44.9393	51.4286	49.5935	1915.8	0.0168688	2.42323
12	18KH1-102	211	36.2	0.171564	3.25537	8.12151	0.266	7.86272	0.968135	3.7594	7.86272	0.0888	2.03385	1520.5	7.86272	1399	2.03385	1.08685		18KH1-102	7.59494	18.5971	23.7069	13.3479	30.4054	2.0071	125.628	250.693	400.407	626.374	943.75	1206.48	1857.14	2410.57	1452.3	0.0324752	0.0676459
12	18KH1-103	229	214.8	0.937991	1.36197	8.66387	0.1132	8.27653	0.955293	8.83392	8.27653	0.0873	2.56157	691.3	8.27653	1366.3	2.56157	0.505965		18KH1-103	-0.000268354	1.54976	1.6056	5.38293	48.6486	0.888099	93.4673	97.2299	84.5528	69.9634	65	59.1093	63.9752	58.1301	1318.4	0.0131703	1.46099
12	18KH1-104	244	144	0.590164	2.16653	6.78791	0.166	6.44824	0.949959	6.0241	6.44824	0.0947	2.12036	990	6.44824	1521.3	2.12036	0.650759		18KH1-104	0.0843882	2.3491	4.87069	11.86	64.527	0.0373002	80.402	71.7452	63.4146	71.2454	64.9375	70.0405	84.472	78.4553	1596.5	0.000517853	0.951818
12	18KH1-106	650.3	359.8	0.553283	1.10235	7.0298	0.0844	6.79895	0.967162	11.8483	6.79895	0.09477	1.78671	522.3	6.79895	1522.7	1.78671	0.343009		18KH1-106	0.00464135	1.4845	1.47629	5.53611	46.1486	0.408526	77.3869	71.7452	57.7236	53.1136	49.875	44.5344	50	43.9024	1349.3	0.00683606	1.54774
12	18KH1-107	320	121	0.378125	1.46418	6.96062	0.128	6.51335	0.935743	7.8125	6.51335	0.083	2.45489	776.4	6.51335	1268.3	2.45489	0.612158		18KH1-107	0.0392405	2.26754	5.16164	14.8578	72.8378	0.461812	94.9749	84.2105	76.0163	76.0073	73.125	78.1377	91.3043	95.122	1658.3	0.00555242	1.0402
12	18KH1-108	69.3	24.2	0.349206	2.68453	8.15827	0.233	7.65007	0.937708	4.29185	7.65007	0.0836	2.83438	1350.2	7.65007	1282.4	2.83438	1.05287		18KH1-108	0.0164557	1.1093	0.711207	3.06346	37.5	0.62167	98.4925	116.066	94.7154	79.304	66.1875	56.2753	62.7329	55.6911	1792.2	0.0102292	1.57003
12	18KH1-109	241	120.1	0.49834	2.00436	4.82419	0.1478	4.31725	0.894917	6.7659	4.31726	0.0984	2.15271	888.6	4.31726	1593.2	2.15271	0.557745		18KH1-109	0.590717	38.3361	1.22845	2.99781	31.8243	22.5577	134.171	295.014	544.715	1047.62	1706.25	2396.76	3850.93	4918.7	1061.93	0.345213	0.0348411
12	18KH1-11	170.2	45.8	0.269095	0.235889	9.29568	0.022	8.0623	0.867318	45.4545	8.0623	0.0778	4.62697	140.28	8.0623	1140.9	4.62697	0.122956		18KH1-11	-2.40506	2.08809	3.07112	13.8074	66.6216	0.763766	95.4774	98.615	82.5203	76.1905	60.25	51.0121	55.0932	41.0569	1431.7	0.0095764	1.73302
12	18KH1-112	221.3	47.8	0.215996	0.783165	9.37966	0.0574	9.00933	0.960518	17.4216	9.00933	0.099	2.60959	359.8	9.00933	1604.5	2.60959	0.224244		18KH1-112	-33.7553	4.64927	8.18966	31.0722	68.0405	0.817052	83.4171	73.6842	69.9187	69.4139	59.8125	65.1822	60.8696	56.0976	1658.3	0.0108452	1.37042
12	18KH1-113	839	251.8	0.300119	2.59574	4.16103	0.1983	3.80065	0.913393	5.04286	3.80065	0.09498	1.69387	1166.2	3.80065	1526.8	1.69387	0.76382		18KH1-113	-17.7215	6.96574	2.1875	10.2626	26.3514	1.36767	35.2764	49.5845	75.7724	124.725	191.25	280.567	448.447	516.26	1328.7	0.0448579	0.0786634
12	18KH1-115	1070	463	0.43271	2.41796	10.4489	0.171	10.2041	0.976572	5.84795	10.2041	0.1026	2.24851	1017.6	10.2041	1670.9	2.24851	0.609013		18KH1-115	-20.6751	29.3638	2.07974	7.85558	38.7162	15.0977	190.955	412.742	760.163	1653.85	2443.75	3238.87	4751.55	5317.07	819.88	0.17559	0.0401879
12	18KH1-116	1050	521	0.49619	0.866767	10.0685	0.0663	9.92332	0.98558	15.083	9.92332	0.09486	1.70371	413.8	9.92332	1524.4	1.70371	0.271451		18KH1-116	-5.18987	4.1925	2.96336	10.8972	30	0.497336	35.5276	34.626	39.2683	39.9267	37.625	36.8421	46.3354	44.3089	1781.9	0.0152337	0.766749
12	18KH1-117	350	261	0.745714	1.70301	7.73478	0.1363	7.54893	0.975973	7.33676	7.54894	0.09066	1.68534	823.7	7.54894	1438.6	1.68534	0.572571		18KH1-117	-2.40506	2.87113	0.926724	3.50109	21.2838	3.94316	63.8191	117.729	200	386.447	611.875	1097.17	1838.51	2317.07	1472.9	0.10699	0.0347124
12	18KH1-12	414.3	23.6	0.0569636	2.47337	5.01847	0.2038	4.71999	0.940524	4.90677	4.71999	0.08806	1.7049	1195.7	4.71999	1382.9	1.7049	0.864632		18KH1-12	-2.40506	9.96737	1.28233	8.75274	24.2568	1.58082	64.8241	103.878	179.268	336.996	493.125	676.113	1015.53	1207.32	1206.13	0.0398655	0.0638329
12	18KH1-121	87.1	252.2	2.89552	0.699233	14.4421	0.0672	13.2957	0.920617	14.881	13.2957	0.0755	5.63918	419.3	13.2957	1080.9	5.63918	0.387917		18KH1-121	-0.801688	5.13866	2.43534	12.2538	27.5676	0.852575	41.206	44.3213	48.7805	57.5092	59.375	57.4899	69.1925	73.5772	1656.24	0.0252961	0.595527
12	18KH1-122	995	7.97	0.00801005	2.37603	4.40819	0.1971	4.10429	0.93106	5.07357	4.10429	0.08747	1.6084	1159.7	4.10429	1370	1.6084	0.846496		18KH1-122	-3.24895	3.00163	3.89009	19.081	55	0.479574	78.8945	92.7978	91.8699	117.949	118.125	122.672	149.689	144.715	1658.3	0.00728032	0.527054
12	18KH1-123	571	265	0.464098	2.173	7.87886	0.177	7.69634	0.976834	5.64972	7.69634	0.08908	1.68607	1050.6	7.69634	1405	1.68607	0.747758		18KH1-123	-29.5359	3.11582	4.88147	21.0066	48.0405	0.195382	62.8141	65.097	65.4472	77.4725	67.25	67.6113	80.1242	75.2033	1791.17	0.00355674	0.783959
12	18KH1-126	1193	18.8	0.0157586	0.127661	11.5858	0.0118	11.2545	0.9714	84.7458	11.2545	0.0785	2.75104	75.62	11.2545	1158.7	2.75104	0.0652628		18KH1-126	-886.076	24.633	23.0603	51.2035	91.8919	2.34458	96.4824	85.0416	82.9268	84.7985	76.5625	72.8745	76.2733	85.3659	1586.2	0.0249002	1.26496
12	18KH1-127	2020	840	0.415842	1.0158	5.17246	0.0808	4.90443	0.948182	12.3762	4.90443	0.09122	1.64343	500.9	4.90443	1450.3	1.64343	0.345377		18KH1-127	-9.70464	3.34421	5.625	23.8512	62.8378	0.161634	71.8593	68.4211	68.6992	87.3626	95.625	93.1174	122.981	108.13	1689.2	0.00240536	0.58431
12	18KH1-128	461	229.4	0.497614	4.01649	3.27737	0.286	2.84724	0.868758	3.4965	2.84724	0.1019	1.62307	1621.5	2.84724	1658.2	1.62307	0.977868		18KH1-128	-4.34599	1.74551	2.57543	12.2319	49.3243	0.817052	69.8492	60.1108	49.187	41.7582	32.8125	27.085	29.6273	23.374	1277.2	0.01392	2.3576
12	18KH1-13	516	26	0.0503876	2.84762	5.22941	0.234	4.81554	0.920857	4.2735	4.81554	0.0883	2.03894	1355.4	4.81554	1388.2	2.03894	0.976372		18KH1-13	-0.886076	2.15334	2.06897	8.7965	39.1892	0.408526	61.809	62.0499	44.3089	36.63	28.75	23.4008	26.4596	20.8943	1534.7	0.00830062	2.33598
12	18KH1-130	758	184.9	0.243931	1.63216	4.74873	0.1244	4.28664	0.902693	8.03858	4.28664	0.0952	2.04331	755.8	4.28664	1531.2	2.04331	0.4936		18KH1-130	-3.5865	5.46493	3.29741	16.7396	37.7703	1.2611	31.9598	38.5042	43.0081	50	45.75	44.1296	57.1429	50.4065	1359.6	0.0362972	0.559296
12	18KH1-132	512	41.7	0.0814453	1.28067	6.74521	0.1062	6.45035	0.956286	9.4162	6.45036	0.0875	1.97251	650.6	6.45036	1370.7	1.97251	0.474648		18KH1-132	-24.4726	9.1354	1.62716	5.36105	25.3378	5.27531	83.4171	177.839	333.333	661.172	1002.5	1388.66	2217.39	2658.54	1349.3	0.114746	0.0376195
12	18KH1-133	660	13.2	0.02	0.540001	14.3449	0.0479	14.1753	0.988179	20.8768	14.1753	0.0818	2.19911	301.6	14.1753	1239.9	2.19911	0.243245		18KH1-133	-637.131	40.1305	10.7759	15.0985	19.9324	10.8348	74.8744	134.626	221.951	419.414	638.75	1036.44	1813.66	2268.29	1637.7	0.280462	0.0412835
12	18KH1-134	320	164	0.5125	2.38654	4.71306	0.1862	4.27055	0.90611	5.37057	4.27055	0.093	1.99382	1100.8	4.27055	1487	1.99382	0.740282		18KH1-134	-5.40084	20.4731	0.592672	2.42888	20.7432	2.20249	98.995	292.798	608.943	1360.81	2262.5	3323.89	5248.45	6284.55	1998.2	0.0486036	0.0188618
12	18KH1-135	518	39.32	0.0759073	1.5316	4.62064	0.126	4.18145	0.90495	7.93651	4.18145	0.0882	1.96617	765	4.18145	1386	1.96617	0.551948		18KH1-135	-1.72996	2.07178	0.80819	3.8512	21.0135	2.06039	48.1407	123.269	182.114	242.308	246.875	293.927	372.05	440.244	1720.1	0.0647805	0.129393
12	18KH1-136	186	175.8	0.945161	2.30459	5.57977	0.18	5.1529	0.923497	5.55556	5.1529	0.0929	2.14043	1067	5.1529	1485	2.14043	0.718519		18KH1-136	-4.85232	10.0979	0.323276	1.90372	10.0676	1.61634	46.9347	98.0609	193.496	368.132	596.25	882.591	1341.61	1674.8	1133	0.0743573	0.0349837
12	18KH1-138	313	179	0.571885	1.43966	7.99552	0.1087	7.62297	0.953405	9.19963	7.62297	0.0961	2.4122	665.2	7.62297	1548.9	2.4122	0.429466		18KH1-138	-5.35865	4.69821	4.81681	9.71554	35.3378	2.71758	33.9196	39.3352	38.252	38.4615	39.8125	35.2227	42.9193	45.122	1575.9	0.0784942	0.790312
12	18KH1-139	646	68.9	0.106656	0.739868	7.10737	0.0498	6.63622	0.933709	20.0803	6.63622	0.1078	2.54467	313.3	6.63622	1761.7	2.54467	0.17784		18KH1-139	0.0200844	12.6917	0.948276	2.36324	13.2432	3.81883	42.6131	76.1773	132.114	216.3	356.25	514.98	837.888	991.87	980.56	0.160754	0.0508577
12	18KH1-141	351.6	124.4	0.353811	1.22548	5.83169	0.0912	5.44394	0.933509	10.9649	5.44394	0.0975	2.09098	562.6	5.44394	1576	2.09098	0.35698		18KH1-141	0.0209705	1.20718	0.743534	2.14442	26.3514	0.186501	57.2864	43.4903	33.4146	19.9634	16.4375	14.4534	13.6646	14.6748	1668.6	0.00480014	4.19233
12	18KH1-143	219	120.4	0.549772	0.719484	12.2992	0.0582	11.9081	0.968196	17.1821	11.9081	0.0897	3.0772	364.7	11.9081	1418.3	3.0772	0.257139		18KH1-143	-7.34177	3.14845	2.61853	4.96718	24.1892	1.33215	71.3568	175.9	403.659	804.029	1487.5	2291.5	3645.96	4455.28	1627.4	0.0320645	0.0195715
12	18KH1-144	343	225	0.655977	0.863209	6.13642	0.0715	5.53542	0.902061	13.986	5.53542	0.0876	2.64854	445.2	5.53542	1372.9	2.64854	0.324277		18KH1-144	0.0190295	0.362153	0.0732759	0.391685	5.54054	1.10124	46.5327	145.706	283.74	432.234	648.125	890.688	1316.77	1642.28	1684.05	0.0685849	0.0353385
12	18KH1-147	602	49.9	0.0828904	3.36552	6.4072	0.264	6.12969	0.956687	3.78788	6.12969	0.0925	1.86524	1510.3	6.12969	1476.8	1.86524	1.02268		18KH1-147	-2.02532	1.63132	3.37284	8.81838	59.7297	0.248668	83.4171	81.1634	74.7967	77.1062	79.125	76.9231	89.441	98.374	1409.04	0.00352287	0.932649
12	18KH1-149	192.8	55.4	0.287344	1.89265	7.73298	0.155	7.46017	0.964722	6.45161	7.46017	0.0886	2.03588	928.9	7.46017	1394.7	2.03588	0.666021		18KH1-149	-19.8312	29.2007	2.89871	4.9453	25.7432	8.86323	71.3568	133.241	253.659	459.707	856.25	1218.62	2018.63	2768.29	1617.1	0.206796	0.0353491
12	18KH1-152	1467	17	0.0115883	0.805122	8.52734	0.0652	8.30048	0.973396	15.3374	8.30048	0.0896	1.95387	407.2	8.30048	1416.2	1.95387	0.28753		18KH1-152	-25.3165	3.89886	9.04095	20.5689	77.027	0.941385	105.528	85.5956	84.9593	108.059	134.375	163.158	191.925	204.878	1699.5	0.0104415	0.549837
12	18KH1-153	98.4	113	1.14837	0.919384	9.77149	0.07	9.28924	0.950647	14.2857	9.28924	0.0953	3.03184	436.2	9.28924	1533.2	3.03184	0.284503		18KH1-153	-3.96624	10.31	5.23707	9.49672	47.4324	3.23268	53.3166	54.5706	53.252	49.8168	50.9375	49.3927	59.8758	56.0976	1678.9	0.0642827	0.890453
12	18KH1-156	412	379	0.919903	1.417	6.43464	0.1019	6.04812	0.93993	9.81354	6.04811	0.1009	2.19657	625.5	6.04811	1639.9	2.19657	0.381426		18KH1-156	-34.1772	6.6721	1.73491	2.97593	15	0.746004	44.1709	96.1219	182.114	366.3	643.125	963.563	1484.47	1829.27	1514.1	0.0289819	0.0297553
12	18KH1-331	246	132.7	0.539431	2.47786	4.40787	0.1867	3.44962	0.782604	5.35619	3.44962	0.0963	2.74399	1103.5	3.44962	1552.8	2.74399	0.710652		18KH1-331	0	31.3214	0.431034	0.656455	39.1892	0	123.618	221.607	512.195	820.513	1287.5	1696.36	2142.86	2845.53	1091.8	0	0.0576884
12	18KH1-334	739	99.3	0.134371	0.842516	12.2735	0.0585	11.6817	0.951777	17.094	11.6816	0.1045	3.7654	366.5	11.6816	1704.7	3.7654	0.214994		18KH1-334	0	6.23165	-0.40194	1.57549	25	1.42096	128.643	268.698	593.496	1208.79	2062.5	2951.42	4347.83	5284.55	1277.2	0.0250564	0.0295879
12	18KH1-335	757	572	0.755614	0.756571	6.7201	0.0598	6.13321	0.912667	16.7224	6.13321	0.0918	2.74653	374.4	6.13321	1462.4	2.74653	0.256018		18KH1-335	0.438819	39.3148	0	1.75055	20.9459	5.86146	46.7337	144.598	332.52	712.454	1525	2753.04	4720.5	7317.07	1493.5	0.187344	0.00990016
12	18KH1-337	665	198.2	0.298045	2.64826	5.99144	0.201	5.48105	0.914813	4.97512	5.48105	0.0956	2.41982	1180.7	5.48105	1539.1	2.41982	0.767137		18KH1-337	-4.13502	2.82219	10.8836	9.19037	109.459	0	149.246	108.587	68.2927	58.2418	40	40.4858	39.1304	58.9431	1186.56	0	3.81407
12	18KH1-338	810	193.7	0.239136	1.96804	5.73452	0.1534	5.46221	0.952515	6.51891	5.46221	0.09309	1.74612	920	5.46221	1488.9	1.74612	0.617906		18KH1-338	-1.01266	3.37684	15.7328	33.2604	186.486	1.13677	178.392	188.089	110.163	89.3773	55.625	54.251	59.0062	40.6504	1225.7	0.00623247	3.02327
12	18KH1-339	600	43.9	0.0731667	1.04422	15.0807	0.082	14.8138	0.982301	12.1951	14.8138	0.0924	2.82477	508	14.8138	1474.8	2.82477	0.344453		18KH1-339	0.192405	0.587276	-0.332974	2.62582	34.4595	0	211.055	204.986	211.382	153.846	123.75	153.846	155.901	151.22	1586.2	0	1.35378
12	18KH1-341	618	60.1	0.0972492	0.203171	14.9095	0.014	13.0612	0.876036	71.4286	13.0612	0.1053	7.19004	89.62	13.0612	1718.7	7.19004	0.0521441		18KH1-341	0	2.969	1.61638	0.897155	14.1892	3.01954	92.9648	282.548	500	901.099	1265.62	1433.2	1819.88	1951.22	1411.1	0.0831385	0.0510831
12	18KH1-344	1273	536	0.421053	1.54037	3.50628	0.113	3.01338	0.859422	8.84956	3.01338	0.09891	1.79265	690.15	3.01338	1602.8	1.79265	0.43059		18KH1-344	-0.21097	18.9233	4.63362	6.34573	66.8919	17.4067	271.357	459.834	784.553	1360.81	1937.5	2728.74	4018.63	4959.35	1054.72	0.129199	0.0675246
12	18KH1-345	556	130.8	0.235252	0.253858	10.3813	0.0223	9.69385	0.933777	44.843	9.69385	0.0826	3.71502	142.18	9.69385	1258.9	3.71502	0.11294		18KH1-345	0	4.99184	1.72414	1.70678	22.973	0.639432	65.8291	144.598	244.715	500	656.25	979.757	1527.95	1837.4	1205.1	0.0164428	0.0430833
12	18KH1-346	109.6	94.4	0.861314	1.11208	7.0468	0.0918	6.31602	0.896296	10.8933	6.31602	0.0879	3.12496	566.2	6.31602	1379.4	3.12496	0.410468		18KH1-346	-0.7173	32.9527	0.538793	2.62582	26.3514	6.74956	117.085	210.526	337.398	613.553	937.5	1404.86	1937.89	2439.02	952.75	0.121513	0.0604191
12	18KH1-347	298.2	98.2	0.329309	0.410491	7.86927	0.035	7.23259	0.919093	28.5714	7.23259	0.0851	3.10081	221.77	7.23259	1316.9	3.10081	0.168403		18KH1-347	0	3.7031	4.31034	4.37637	25.6757	-0.648313	36.6834	45.4294	41.8699	38.6447	29.375	43.7247	39.7516	39.0244	1380.2	-0.0211246	0.922817
12	18KH1-348	631.9	20.8	0.0329166	1.2941	4.3017	0.1106	3.42041	0.795131	9.04159	3.42041	0.0849	2.60872	676.2	3.42041	1312.4	2.60872	0.515239		18KH1-348	0	1.81077	0	0	6.08108	0	135.678	240.166	256.098	283.883	272.5	226.721	254.658	211.382	1380.2	0	0.532786
12	18KH1-349	492	82.2	0.167073	1.02861	5.38075	0.0876	4.70943	0.875236	11.4155	4.70943	0.0852	2.60265	541.3	4.70943	1319.2	2.60265	0.410324		18KH1-349	0	1.01142	1.93966	3.71991	67.5676	0	223.618	174.515	189.837	195.971	216.875	323.887	106.211	910.569	1339	0	2.10541
12	18KH1-350	246.8	289.3	1.1722	0.78281	5.24195	0.0677	4.47652	0.85398	14.7711	4.47652	0.0839	2.72742	422.28	4.47652	1289.4	2.72742	0.327501		18KH1-350	0	2.28385	3.44828	4.59519	29.7297	0	40.7035	66.759	53.6585	31.1355	60.625	33.1984	39.1304	47.9675	1442	0	1.0402
12	18KH1-351	269	199.2	0.74052	1.38667	4.94622	0.1058	4.58791	0.92756	9.4518	4.58791	0.0951	1.84827	648.3	4.58791	1529.2	1.84827	0.423947		18KH1-351	0.199578	21.044	2.26293	2.27571	35.1351	4.26288	134.673	235.457	426.829	818.681	1131.25	1542.51	2149.07	2869.92	1002.19	0.0619714	0.0626659
12	18KH1-353	130.5	205.2	1.57241	3.12059	4.21959	0.2286	3.86476	0.915909	4.37445	3.86476	0.09905	1.69368	1327.2	3.86476	1605.5	1.69368	0.826658		18KH1-353	-1.30802	39.3148	3.55603	4.79212	28.3784	4.97336	76.3819	105.54	151.22	272.894	398.75	724.696	1161.49	1589.43	1159.78	0.106822	0.065762
12	18KH1-354	343	153	0.446064	0.241645	9.94932	0.0217	6.84933	0.688422	46.0829	6.84933	0.0808	7.21635	138.39	6.84933	1215.7	7.21635	0.113836		18KH1-354	-2.99578	7.99347	7.00431	2.62582	18.9189	2.13144	134.673	235.457	560.976	985.348	1775	2461.54	3844.72	4918.7	1136.09	0.0422264	0.0350281
12	18KH1-355	328	58.7	0.178963	1.82189	5.59477	0.1516	4.92377	0.880066	6.59631	4.92377	0.0872	2.65669	909.9	4.92377	1364.1	2.65669	0.667033		18KH1-355	0	1.17455	2.69397	0.459519	83.7838	0.692718	179.397	138.504	77.6423	52.9304	31.875	18.2186	26.7081	24.7967	1606.8	0.00565026	6.71696
12	18KH1-356	448	497.5	1.11049	2.09526	5.04582	0.1626	4.66538	0.924604	6.15006	4.66538	0.0935	1.9221	971.2	4.66538	1497.2	1.9221	0.648678		18KH1-356	0	81.7292	0.969828	1.4442	18.2432	19.1829	65.3266	152.355	297.967	633.7	1093.75	2004.05	2950.31	4756.1	1194.8	0.555673	0.0221423
12	18KH1-357	762	20.8	0.0272966	0.437466	7.15164	0.0373	6.58121	0.920237	26.8097	6.58121	0.0851	2.79888	236.08	6.58121	1316.9	2.79888	0.179269		18KH1-357	0	0.8646	0	0.459519	9.45946	0	47.7387	146.814	314.634	587.912	906.25	1323.89	2652.17	3788.62	1493.5	0	0.0179998
12	18KH1-359	237.4	167.9	0.707245	0.797641	11.3695	0.0563	10.3823	0.913175	17.762	10.3823	0.1028	4.63382	353.1	10.3823	1674.5	4.63382	0.210869		18KH1-359	0	52.8548	0	0	7.43243	3.01954	28.6432	55.1247	116.667	249.084	543.75	890.688	1677.02	2304.88	1297.8	0.206949	0.0170798
12	18KH1-362	795	251.6	0.316478	3.41957	4.86709	0.2478	4.57498	0.939982	4.03551	4.57498	0.10013	1.66076	1427.1	4.57498	1625.7	1.66076	0.877837		18KH1-362	0	14.3556	1.8319	0	10.1351	0	70.3518	135.734	203.659	500	743.75	1036.44	1689.44	2365.85	1194.8	0	0.041642
12	18KH1-363	409	26.5	0.0647922	1.08736	6.98904	0.103	6.53465	0.934985	9.70874	6.53465	0.0766	2.47892	632	6.53465	1109.9	2.47892	0.569421		18KH1-363	0	1.12561	2.90948	4.59519	45.2703	0	119.598	138.504	119.919	135.531	201.875	219.838	409.938	467.48	1400.8	0	0.291747
12	18KH1-365	164.6	106.3	0.645808	3.28742	4.34822	0.2436	3.97583	0.914358	4.10509	3.97583	0.09792	1.76062	1405.4	3.97583	1584	1.76062	0.887247		18KH1-365	0	37.6835	0	0.743982	5.67568	1.59858	19.598	90.5817	177.236	340.659	556.25	866.397	1385.09	1857.72	1060.9	0.151572	0.0141492
12	18KH1-366	3000	120.3	0.0401	1.12723	5.84569	0.0919	5.31161	0.908636	10.8814	5.31161	0.089	2.44109	566.8	5.31161	1403.3	2.44109	0.403905		18KH1-366	0	1.27243	0.538793	2.73523	34.4595	5.68384	321.608	811.634	1260.16	1666.67	1937.5	1939.27	2074.53	2276.42	1246.3	0.0539913	0.155027
12	18KH1-368	384	286.5	0.746094	2.07717	3.76301	0.1569	3.29409	0.875389	6.37349	3.29409	0.09606	1.81911	939.5	3.29409	1548.1	1.81911	0.606873		18KH1-368	0	39.9674	0	3.6105	22.2973	17.4067	82.4121	207.756	313.821	692.308	1012.5	1655.87	2434.78	3536.59	968.2	0.406066	0.0338478
12	18KH1-369	148	4.8	0.0324324	0.152957	15.9909	0.0151	14.75	0.922398	66.2252	14.75	0.0735	6.17635	96.61	14.75	1026.9	6.17635	0.0940793		18KH1-369	0	8.04241	5.38793	7.65864	52.027	3.19716	42.2111	52.3546	55.2846	46.337	34.375	42.1053	40.9938	39.4309	1249.39	0.0682239	1.02969
12	18KH1-371	310	27	0.0870968	1.82519	8.3693	0.135	7.75627	0.926752	7.40741	7.75627	0.0981	3.14412	816.3	7.75627	1587.5	3.14412	0.514205		18KH1-371	0	0.91354	0	0	18.2432	0	59.2965	91.4127	97.561	82.4176	101.25	100.81	180.124	203.252	1194.8	0	0.329198
12	18KH1-372	273.7	76.3	0.278772	2.28603	4.8011	0.1931	4.20606	0.876061	5.17866	4.20606	0.0859	2.3151	1138.1	4.20606	1335.1	2.3151	0.852446		18KH1-372	0	0.96248	2.47845	3.71991	41.2162	0	133.166	110.249	92.6829	83.5165	67.5	50.6073	79.5031	55.2846	968.2	0	1.67498
12	18KH1-373	513	59.8	0.116569	1.11258	6.43917	0.0903	5.99579	0.931143	11.0742	5.99579	0.0894	2.34808	557.3	5.99579	1411.9	2.34808	0.394716		18KH1-373	0	10.2447	1.18534	2.31947	16.2162	0	67.3367	144.044	174.797	362.637	601.25	923.077	1714.29	2069.11	1400.8	0	0.0392797
12	18KH1-374	278	91.1	0.327698	3.68757	3.74198	0.2529	3.11158	0.831533	3.95413	3.11158	0.1058	2.07857	1453.4	3.11158	1727.4	2.07857	0.84138		18KH1-374	-0.590717	21.8597	0	2.07877	14.8649	4.61812	104.02	191.136	310.569	648.352	1031.25	1364.37	1869.57	2430.89	1025.88	0.117443	0.0556387
12	18KH1-404	1026	27.6	0.0269006	1.36515	4.48443	0.1118	3.81295	0.850263	8.94454	3.81295	0.0886	2.36042	683.2	3.81295	1394.7	2.36042	0.489854		18KH1-404	0	0.440457	0	0	25.6757	1.59858	130.151	473.684	723.577	1040.29	1256.25	1153.85	1496.89	1674.8	1442	0.0276535	0.0869472
12	18KH1-405	483.3	1180	2.44155	0.0291584	6.86075	0.004309	2.72536	0.39724	232.072	2.72536	0.0491	6.29621	27.72	2.72536	151.6	6.29621	0.18285		18KH1-405	0	339.315	9.91379	14.2232	105.405	33.2149	442.211	700.831	1105.69	1809.52	2318.75	3303.64	3925.47	4837.4	822.97	0.153846	0.112652
12	18KH1-406	70	61.4	0.877143	2.8622	5.64778	0.22	5.09423	0.901988	4.54545	5.09423	0.0944	2.43848	1281.9	5.09423	1515.3	2.43848	0.845971		18KH1-406	0	29.5269	0.538793	0	7.22973	3.37478	73.8693	130.194	214.228	358.974	543.75	801.619	1217.39	1463.41	1040.3	0.146033	0.0606784
12	18KH1-503	409.5	48.6	0.118681	1.33014	3.98377	0.1098	3.50225	0.87913	9.10747	3.50225	0.0879	1.89859	671.6	3.50225	1379.4	1.89859	0.486878		18KH1-503	0	0.0522023	0	0	15.5405	0	81.407	84.4875	125.203	163.004	193.125	283.401	431.677	699.187	1133	0	0.188583
12	18KH1-507	515	47.7	0.0926214	1.09533	6.63539	0.0862	6.34781	0.956659	11.6009	6.34781	0.0922	1.9323	533	6.34781	1470.7	1.9323	0.362412		18KH1-507	0	0.783034	0.840517	3.89497	42.5676	0	163.317	218.837	177.642	186.813	153.125	193.522	198.758	245.122	1313.25	0	0.821687
12	18KH1-511	366	24.6	0.0672131	1.39983	8.6087	0.1084	8.17168	0.949235	9.22509	8.17169	0.0937	2.70802	663.4	8.17169	1501.2	2.70802	0.441913		18KH1-511	0	0.309951	0	1.18162	19.5946	0	110.05	141.274	165.041	150.183	171.25	186.235	253.416	390.244	1277.2	0	0.434267
12	18KH1-512	377.7	24.5	0.0648663	1.626	3.86169	0.1199	2.57942	0.66795	8.34028	2.57942	0.0984	2.87389	729.99	2.57942	1593.2	2.87389	0.458191		18KH1-512	0	0.440457	0	0.83151	41.2162	0	135.176	204.986	204.065	223.443	210	229.96	291.304	317.073	1421.4	0	0.464037
12	18KH1-513	317	68.3	0.215457	1.54267	5.57258	0.1304	5.28169	0.9478	7.66871	5.28169	0.08584	1.7769	790.1	5.28169	1333.7	1.7769	0.592412		18KH1-513	0	0.570962	0	4.37637	47.973	0	139.698	130.194	97.1545	72.8938	56.25	33.6032	57.1429	31.3008	1349.3	0	2.44472
12	18KH1-514	360	314.4	0.873333	1.53156	5.09359	0.1204	3.51482	0.690048	8.30565	3.51482	0.0923	3.68655	732.9	3.51482	1472.7	3.68655	0.497657		18KH1-514	0	1.50082	3.66379	5.03282	44.5946	0	58.794	57.3407	56.5041	58.6081	55.625	45.3441	65.8385	55.2846	1545	0	0.893003
12	18KH1-515	350.2	56.2	0.16048	2.37871	6.46166	0.211	6.13468	0.949397	4.73934	6.13468	0.0818	2.02947	1234.1	6.13468	1239.9	2.02947	0.995322		18KH1-515	0	6.85155	12.6078	13.1291	72.973	0.763766	66.3317	80.3324	61.3821	65.0183	76.875	55.4656	73.2919	76.4228	1452.3	0.0109779	0.905034
12	18KH1-516	1608	25	0.0155473	1.33639	3.886	0.1054	3.2365	0.832861	9.48767	3.2365	0.092	2.15083	645.98	3.2365	1466.5	2.15083	0.440491		18KH1-516	-1.94093	2.56117	1.61638	0.700219	23.6486	4.79574	169.849	459.834	723.577	1109.89	993.75	1291.5	1385.09	1548.78	1462.6	0.0756694	0.122627
12	18KH1-517	748	114.3	0.152807	2.51898	5.83625	0.1474	5.39907	0.925092	6.78426	5.39907	0.124	2.21627	886.4	5.39907	2013.8	2.21627	0.440163		18KH1-517	0	13.3768	0.969828	1.66302	17.5676	5.50622	105.025	249.307	365.854	608.059	856.875	1263.16	1770.19	2414.63	1503.8	0.128189	0.05933
12	18KH1-518	777	391	0.503218	1.76518	4.02097	0.1262	3.603	0.896052	7.92393	3.603	0.10149	1.7851	766.2	3.603	1650.7	1.7851	0.464167		18KH1-518	0	20.2284	0.969828	7.87746	35.1351	1.95382	165.327	360.111	565.041	1045.79	1593.75	2263.16	3198.76	3674.8	1287.5	0.0256355	0.0516846
12	18KH1-519	205.5	58.2	0.283212	1.20152	7.02464	0.1083	6.60023	0.939583	9.23361	6.60023	0.0805	2.40468	662.9	6.60023	1208.4	2.40468	0.548577		18KH1-519	0	0.473083	1.93966	0.371991	24.3243	0	65.8291	88.0886	59.7561	75.0916	69.375	48.9879	63.354	73.5772	1148.45	0	1.03907
12	18KH1-520	428.6	61.6	0.143724	0.718696	5.69385	0.0647	5.31479	0.933426	15.4559	5.31479	0.0806	2.04279	404.1	5.31479	1210.8	2.04279	0.333746		18KH1-520	-0.506329	4.24144	4.4181	3.71991	22.973	0	53.7688	163.435	234.146	300.366	305.625	400.81	583.851	780.488	1545	0	0.0920934
12	18KH1-521	220	123.9	0.563182	0.808923	8.79837	0.0546	8.20444	0.932496	18.315	8.20444	0.1075	3.1778	342.7	8.20444	1756.6	3.1778	0.195093		18KH1-521	0	0.50571	1.72414	3.06346	53.3784	0	62.3116	71.1911	41.4634	33.1502	21.25	13.7652	16.7702	23.1707	1277.2	0	3.71562
12	18KH1-522	732	237	0.32377	2.10757	4.63409	0.1536	4.3659	0.942127	6.51042	4.3659	0.09956	1.55361	921.1	4.3659	1615	1.55361	0.570341		18KH1-522	0	5.10604	0	0.962801	14.1892	0.888099	57.7889	191.136	237.805	490.842	768.75	1279.35	1931.68	2365.85	1339	0.0310142	0.0299165
12	18KH1-524	283.6	76.5	0.269746	0.927592	7.62015	0.0779	7.06036	0.926538	12.837	7.06036	0.0864	2.86671	483.6	7.06036	1346.3	2.86671	0.359207		18KH1-524	0	0.96248	0.387931	0.371991	25	0	82.4121	146.814	161.789	179.487	168.75	189.474	190.062	189.431	1353.42	0	0.433606
12	18KH1-526	837	761	0.9092	2.02997	4.0936	0.1521	3.69574	0.90281	6.57462	3.69574	0.09684	1.76041	912.7	3.69574	1563.3	1.76041	0.583829		18KH1-526	0	88.4176	0	4.59519	14.1892	21.492	176.382	324.1	516.26	978.022	1543.75	2137.65	3565.22	4390.24	1091.8	0.429607	0.049473
12	18KH1-527	1103	16.9	0.0153218	2.85694	3.42796	0.221	2.7422	0.799953	4.52489	2.7422	0.0938	2.05699	1287.2	2.7422	1503.2	2.05699	0.856307		18KH1-527	0	0.603589	0	0	8.78378	0	116.08	229.917	483.74	675.824	650	708.502	875.776	914.634	1411.1	0	0.132546
12	18KH1-529	183.6	53.7	0.292484	0.33203	9.26929	0.0271	8.0832	0.872042	36.9004	8.0832	0.0889	4.53668	172.37	8.0832	1401.1	4.53668	0.123025		18KH1-529	0	1.53344	1.8319	1.88184	43.2432	0	76.8844	99.723	57.3171	57.5092	45	36.0324	48.4472	42.2764	1174.2	0	1.58697
12	18KH1-530	318.7	7.5	0.0235331	1.4239	7.14991	0.0935	6.31602	0.88337	10.6952	6.31602	0.1105	3.35099	576.2	6.31602	1806.8	3.35099	0.318906		18KH1-530	0	0.489396	0.765086	0	8.04054	0	45.2261	141.274	219.106	375.458	511.875	931.174	1279.5	1707.32	1287.5	0	0.0353466
12	18KH1-531	573	139.1	0.242757	0.526968	12.8801	0.0435	12.6251	0.980202	22.9885	12.6251	0.0879	2.55026	274.5	12.6251	1379.4	2.55026	0.199		18KH1-531	0	27.5693	0.463362	0.437637	20.9459	0	55.2764	104.432	178.049	406.593	656.25	1283.4	2291.93	3378.05	1452.3	0	0.0241179
12	18KH1-532	731	27.1	0.0370725	0.160676	14.9619	0.0127	14.3586	0.959678	78.7402	14.3586	0.0918	4.20584	81.35	14.3586	1462.4	4.20584	0.0556277		18KH1-532	0	1.63132	1.8319	1.46608	6.82432	1.95382	39.196	104.709	198.78	417.582	712.5	1267.21	2298.14	3414.63	1335.91	0.119463	0.0170555
12	18KH1-533	458.3	380	0.829151	0.134131	7.40121	0.01085	4.19	0.566124	92.1659	4.19	0.0897	6.10096	69.57	4.19	1418.3	6.10096	0.0490517		18KH1-533	-0.168776	13.2137	2.80172	0	19.5946	1.7762	64.8241	83.9335	193.902	379.121	693.75	1036.44	1888.2	2560.98	1277.2	0.0498374	0.0343312
12	18KH1-534	1242	47.9	0.0385668	1.2268	4.19851	0.1041	3.83918	0.914414	9.60615	3.83918	0.08551	1.69948	638.4	3.83918	1326.3	1.69948	0.481339		18KH1-534	0	0.603589	0.3125	0	4.12162	3.19716	33.6683	120.222	287.805	615.385	981.25	1805.67	2795.03	3650.41	1317.37	0.271406	0.0120458
12	18KH1-538	783	262	0.33461	2.86051	3.68367	0.2086	3.21971	0.874049	4.79386	3.21971	0.0995	1.78967	1221.4	3.21971	1613.9	1.78967	0.7568		18KH1-538	-9.70464	43.7194	5.28017	4.814	38.5135	0	125.628	301.939	487.805	1012.82	1487.5	2404.86	3397.52	4158.54	1244.24	0	0.0369765
12	18KH1-539	311.9	12.7	0.0407182	2.51303	5.44513	0.1982	5.09014	0.934805	5.04541	5.09013	0.092	1.9339	1165.6	5.09013	1466.5	1.9339	0.794818		18KH1-539	0	3.88254	1.2931	1.22538	6.01351	0	39.196	102.493	217.886	415.751	750	1206.48	1937.89	2882.11	1318.4	0	0.0202261
12	18KH1-540	149.6	50.85	0.339906	2.35804	8.10258	0.1259	7.05727	0.870991	7.94281	7.05727	0.1359	3.9808	764.4	7.05727	2174.8	3.9808	0.351481		18KH1-540	0.180591	2.49592	1.18534	0.700219	22.973	1.52753	116.583	224.377	471.545	908.425	1356.25	1793.52	2708.07	3630.08	1206.13	0.0295164	0.0430501
12	18KH1-542	337	371.7	1.10297	1.597	3.98036	0.1279	3.28508	0.825323	7.81861	3.28508	0.0906	2.24756	775.9	3.28508	1437.4	2.24756	0.539794		18KH1-542	0	1.01142	1.18534	5.47046	17.5676	0	36.6834	33.795	28.4553	32.6007	25	28.7449	39.1304	30.8943	1302.95	0	0.937465
12	18KH1-543	538	224.7	0.417658	2.03504	3.10048	0.1784	2.63669	0.850412	5.60538	2.63669	0.08277	1.63122	1058.2	2.63669	1262.9	1.63122	0.837913		18KH1-543	0.194937	2.18597	7.75862	18.3807	97.2973	0	187.94	153.186	119.106	106.227	72.5	93.5223	88.8199	62.6016	1178.32	0	2.11596
12	18KH1-549	747	125	0.167336	0.461812	10.4346	0.0358	8.95947	0.85863	27.933	8.95947	0.0936	5.34873	226.75	8.95947	1499.2	5.34873	0.151247		18KH1-549	-2.40506	2.4633	5.92672	5.47046	31.7568	0	86.9347	106.925	208.13	413.919	605	817.814	1037.27	1556.91	1380.2	0	0.0838113
12	18KH1-551	648	87.9	0.135648	1.56031	6.93778	0.1288	6.5506	0.944192	7.76398	6.5506	0.0879	2.28528	781	6.5506	1379.4	2.28528	0.566188		18KH1-551	-0.337553	9.59217	1.50862	4.13567	34.4595	14.2096	131.156	351.801	609.756	1031.14	1300	1821.86	2527.95	3113.82	1283.38	0.211365	0.0518823
12	18KH1-600	2201	1861	0.845525	1.78436	3.56665	0.1445	2.75826	0.773346	6.92042	2.75826	0.0896	2.2612	870.1	2.75826	1416.2	2.2612	0.614391		18KH1-600	-50.6329	92.9853	53.8793	21.4442	37.8378	7.1048	194.472	437.673	764.228	1481.68	2268.75	3506.07	4925.47	5365.85	1118.58	0.0828246	0.039483
12	18KH1-601	1253	14.7	0.0117318	1.91648	5.33794	0.1333	5.05471	0.946942	7.50188	5.05471	0.10432	1.71564	806.7	5.05471	1701.5	1.71564	0.474111		18KH1-601	-0.295359	0.326264	0	0	8.10811	0	71.3568	174.515	341.057	434.066	393.75	299.595	367.081	321.138	1390.5	0	0.19439
12	18KH1-602	1098	261.2	0.237887	1.46161	3.753	0.1099	3.10964	0.828574	9.09918	3.10964	0.0965	2.10123	672.17	3.10964	1556.7	2.10123	0.431792		18KH1-602	0	9.46166	0	0	25.6757	1.24334	135.678	299.169	463.415	738.095	1056.25	1230.77	2111.8	2439.02	1390.5	0.0210656	0.0642477
12	18KH1-603	533	198.1	0.37167	1.25956	6.74576	0.0953	6.4081	0.949944	10.4932	6.4081	0.0959	2.1075	586.8	6.4081	1545	2.1075	0.379806		18KH1-603	0	45.1876	0	2.93217	46.6216	24.3339	148.744	326.87	463.415	787.546	1243.75	1777.33	2397.52	3292.68	934.21	0.292213	0.0620408
12	18KH1-604	357.8	21.3	0.0595305	1.81199	7.39175	0.147	7.18102	0.971491	6.80272	7.18102	0.08944	1.75241	884.1	7.18102	1412.7	1.75241	0.625823		18KH1-604	0	0.587276	0	1.55361	41.8919	0	221.106	191.136	120.325	76.9231	50	34.8178	34.7826	27.6423	1369.9	0	6.35678
12	18KH1-605	717	13.3	0.0185495	1.20107	7.6773	0.0958	7.46146	0.971886	10.4384	7.46146	0.09097	1.80764	589.7	7.46146	1445.1	1.80764	0.408069		18KH1-605	0	0	0	0	3.78378	0	10.0503	102.493	170.325	293.04	383.75	692.308	1093.17	1357.72	1305.01	0	0.0091937
12	18KH1-606	498	71.2	0.142972	0.133405	15.7268	0.0102	13.9169	0.884913	98.0392	13.9169	0.0949	7.32488	65.42	13.9169	1525.2	7.32488	0.0428927		18KH1-606	0	1.20718	1.50862	2.84464	33.1081	0	113.568	155.125	123.171	80.5861	65	79.7571	45.9627	59.3496	1181.41	0	2.47087
12	18KH1-608	236.7	73.4	0.310097	0.323531	10.5549	0.0262	9.81527	0.929929	38.1679	9.81527	0.0896	3.88143	166.72	9.81527	1416.2	3.88143	0.117723		18KH1-608	0	0.946166	4.20259	4.15755	29.7297	0	66.8342	70.6371	52.439	47.4359	43.75	25.9109	43.4783	30.4878	1215.4	0	1.53719
12	18KH1-610	658	62.7	0.0952888	1.08031	7.69258	0.087	7.3791	0.959248	11.4942	7.3791	0.0901	2.17366	537.8	7.3791	1426.8	2.17366	0.376927		18KH1-610	0	0.685155	1.50862	0.350109	7.16216	0	72.3618	126.316	252.439	445.055	787.5	1121.46	1838.51	2426.83	1339	0	0.039359
12	18KH1-611	899	20.4	0.0226919	2.08863	3.91721	0.1732	3.38433	0.863965	5.77367	3.38433	0.0875	1.97251	1029.7	3.38433	1370.7	1.97251	0.751222		18KH1-611	0	0.163132	0	0	3.78378	1.13677	98.995	243.767	349.593	380.952	393.75	489.879	428.571	479.675	1462.6	0.0587357	0.230988
12	18KH1-612	157.1	235	1.49586	1.94151	7.56497	0.175	7.23259	0.956064	5.71429	7.23259	0.0805	2.21773	1039.6	7.23259	1208.4	2.21773	0.860311		18KH1-612	-0.172996	3.06688	5.28017	5.9081	43.9189	0.479574	76.8844	63.9889	73.1707	71.2454	75	82.5911	62.7329	107.317	1266.9	0.00825297	1.22558
12	18KH1-614	1276	44.6	0.034953	0.626623	9.50081	0.0498	8.93562	0.940511	20.0803	8.93562	0.0913	3.22802	313.3	8.93562	1452	3.22802	0.215771		18KH1-614	0	0.636215	1.8319	0	14.8649	0	133.166	321.33	540.65	739.927	850	923.077	1118.01	1252.03	1277.2	0	0.119109
12	18KH1-616	1591	26.6	0.016719	1.98345	4.3479	0.1585	3.85321	0.886224	6.30915	3.85321	0.0908	2.0142	948.4	3.85321	1441.6	2.0142	0.65788		18KH1-616	0	0.179445	0	0	8.78378	0	180.402	437.673	569.106	688.645	499.375	453.441	403.727	308.943	1719.07	0	0.446842
12	18KH1-617	686	25	0.0364431	0.23203	13.2222	0.0183	12.777	0.966334	54.6448	12.777	0.092	3.40193	116.9	12.777	1466.5	3.40193	0.0797136		18KH1-617	0	0.424144	0	0.743982	26.3514	0	84.9246	170.083	160.163	122.711	91.875	90.6883	68.323	39.8374	1349.3	0	1.24299
12	18KH1-618	249.3	59	0.236663	0.618527	8.44607	0.055	7.97521	0.944252	18.1818	7.97522	0.0816	2.78065	345.1	7.97522	1235.1	2.78065	0.279411		18KH1-618	0	0.538336	1.50862	3.80744	35.8108	0	121.106	119.668	64.2276	41.5751	25.625	14.17	15.3416	21.1382	1225.7	0	7.89392
12	18KH1-619	581	23	0.0395869	1.56617	5.40356	0.1274	4.82244	0.892455	7.84929	4.82244	0.0892	2.43774	773	4.82244	1407.6	2.43774	0.549162		18KH1-619	0	3.11582	0	0	4.72973	0	25.6281	102.493	297.154	467.033	775	1012.15	1658.39	2439.02	1411.1	0	0.0154537
12	18KH1-620	421	48	0.114014	0.464901	8.58701	0.0427	8.06332	0.939014	23.4192	8.06333	0.079	2.9529	269.5	8.06333	1171.2	2.9529	0.230106		18KH1-620	0	0.8646	2.47845	1.18162	39.8649	0	116.583	150.97	140.65	153.846	169.375	251.012	329.193	378.049	1287.5	0	0.354148
12	18KH1-623	1098	176	0.160291	3.0123	3.46556	0.2177	2.91536	0.841238	4.59348	2.91536	0.1004	1.87371	1269.7	2.91536	1630.7	1.87371	0.778623		18KH1-623	0	9.6248	3.98707	3.50109	31.0811	18.4725	128.643	265.928	382.114	661.172	1087.5	1595.14	2571.43	3292.68	1163.9	0.292135	0.0500279
12	18KH1-624	621	221.8	0.357166	2.02245	3.62715	0.1647	2.60088	0.71706	6.07165	2.60088	0.0891	2.52816	982.8	2.60088	1405.4	2.52816	0.699303		18KH1-624	0	26.5905	2.69397	4.15755	22.973	8.88099	126.131	213.296	322.764	593.407	937.5	1477.73	2273.29	3463.41	1266.9	0.164984	0.0554837
12	18KH1-625	604	8.8	0.0145695	0.384253	6.16371	0.03396	3.62153	0.587557	29.4464	3.62153	0.0821	4.98756	215.29	3.62153	1247	4.98756	0.172646		18KH1-625	0	0.0978793	0	0	0	3.01954	24.6231	95.2909	215.041	391.941	700	963.563	1888.2	2065.04	1534.7	#DIV/0!	0.0130405
12	18KH1-627	709	44.9	0.0633286	1.74277	5.5298	0.1379	5.1797	0.936689	7.25163	5.1797	0.0917	1.93632	832.8	5.1797	1460.3	1.93632	0.570294		18KH1-627	0	0.652529	0	0.371991	9.45946	0	100.503	188.366	230.081	199.634	211.875	165.182	183.851	186.179	1339	0	0.546652
12	18KH1-628	677	41.3	0.0610044	0.81009	5.32859	0.0641	4.93669	0.926455	15.6006	4.9367	0.0917	2.00571	400.51	4.9367	1460.3	2.00571	0.274266		18KH1-628	0	0.848287	0.269397	0	4.93243	0	26.1307	84.4875	194.715	430.403	812.5	1457.49	2813.66	4743.9	1296.77	0	0.00928705
12	18KH1-629	1335	31	0.023221	1.37004	5.58392	0.1177	5.28462	0.946399	8.49618	5.28462	0.08446	1.80361	717.3	5.28462	1302.3	1.80361	0.550795		18KH1-629	0	0.391517	0	0	0	0	94.9749	271.468	695.122	1206.96	1668.75	1955.47	2732.92	3333.33	1596.5	#DIV/0!	0.0347522
12	18KH1-631	968	209.7	0.216632	0.231989	12.2512	0.0181	11.2866	0.92126	55.2486	11.2866	0.093	4.76506	115.64	11.2866	1487	4.76506	0.0777673		18KH1-631	-0.337553	6.03589	2.37069	4.37637	17.5676	0.888099	69.8492	99.723	141.87	289.377	556.25	991.903	1695.65	2682.93	1256.6	0.0253527	0.0411931
12	18KH1-633	184	58.1	0.315761	0.191247	15.1849	0.0168	9.7976	0.64522	59.5238	9.7976	0.0826	11.6012	107.4	9.7976	1259	11.6012	0.0853058		18KH1-633	-3.45992	5.70962	5.38793	2.80088	26.3514	3.37478	86.9347	177.285	280.488	518.315	725	1251.01	2298.14	3292.68	1256.6	0.0705094	0.0378283
12	18KH1-636	1298	196.3	0.151233	1.78183	4.46794	0.1395	4.13878	0.926328	7.16846	4.13878	0.09268	1.68315	841.8	4.13878	1480.5	1.68315	0.568592		18KH1-636	0	22.5122	1.07759	0.568928	6.08108	3.5524	71.3568	121.884	263.821	569.597	756.25	1380.57	2217.39	2613.82	1184.5	0.170535	0.0321805
12	18KH1-637	618	586.9	0.949676	0.680702	6.16791	0.0526	5.62481	0.911947	19.0114	5.62481	0.0939	2.53074	330.46	5.62481	1505.3	2.53074	0.219531		18KH1-637	-13.0802	76.6721	8.29741	9.19037	97.2973	36.7673	412.06	531.856	914.634	1501.83	1937.5	2688.26	3869.57	4552.85	1205.1	0.183625	0.106487
12	18KH1-641	1083	153.6	0.141828	0.111946	9.5473	0.00959	8.35213	0.874815	104.275	8.35212	0.0847	4.62525	61.53	8.35212	1307.8	4.62525	0.0470485		18KH1-641	0	5.87276	0.646552	2.27571	19.5946	4.61812	80.402	152.355	269.512	501.832	881.25	1117.41	1819.88	2682.93	1297.8	0.116349	0.0441799
12	18KH1-642	633	25.2	0.0398104	1.83721	5.88867	0.1527	5.42344	0.920997	6.54879	5.42344	0.0873	2.29405	916.1	5.42344	1366.3	2.29405	0.670497		18KH1-642	0	0.619902	0	0.787746	22.973	5.3286	103.015	149.584	127.236	177.106	164.375	127.935	177.64	142.276	1215.4	0.109535	0.57991
12	18KH1-643	1121	193	0.172168	1.38049	4.57875	0.0983	3.74078	0.816985	10.1729	3.74078	0.1019	2.64038	604.4	3.74078	1658.2	2.64038	0.364492		18KH1-643	0	5.90538	0.646552	0	20.2703	2.6643	72.3618	131.856	276.423	575.092	993.75	1574.9	2813.66	4532.52	1359.6	0.0695662	0.025718
12	18KH1-644	1271	405.4	0.318961	0.531206	7.09051	0.0438	6.36608	0.89783	22.8311	6.36608	0.088	3.12225	276.34	6.36608	1381.6	3.12225	0.200014		18KH1-644	-1.05485	10.2773	1.93966	5.9081	43.2432	21.8472	148.744	177.285	284.553	576.923	718.75	1060.73	1621.12	2361.79	1210.25	0.272407	0.0917538
12	18KH1-645	1890	925	0.489418	2.88275	3.35461	0.2071	2.97258	0.886119	4.82859	2.97258	0.101	1.55472	1213.3	2.97258	1641.7	1.55472	0.739051		18KH1-645	0	30.3426	1.61638	7.00219	72.973	0	287.437	545.706	1073.17	1967.03	2943.75	4453.44	5577.64	7195.12	1369.9	0	0.0515338
12	18KH1-646	472	23.9	0.0506356	0.851318	6.67632	0.0757	5.52164	0.827049	13.21	5.52164	0.0816	3.75296	470.4	5.52164	1235.1	3.75296	0.38086		18KH1-646	0	0.783034	1.2931	0	2.5	1.42096	106.03	168.975	215.041	305.861	260.625	307.692	372.671	418.699	1380.2	0.0872764	0.284514
12	18KH1-647	327.6	221.3	0.675519	2.52476	5.00577	0.177	4.47767	0.894501	5.64972	4.47767	0.1035	2.23791	1050.6	4.47767	1687	2.23791	0.622762		18KH1-647	-0.759494	33.279	0.484914	3.50109	41.8919	11.1901	163.819	271.468	516.26	915.751	1550	2251.01	3229.81	4268.29	967.17	0.135078	0.0507209
12	18KH1-648	438	131	0.299087	3.60198	4.03208	0.2632	3.26518	0.809801	3.79939	3.26518	0.0993	2.36564	1506.2	3.26518	1610.2	2.36564	0.935412		18KH1-648	-1.4346	12.2349	1.93966	5.47046	24.3243	18.1172	108.543	177.285	341.463	586.081	1206.25	1748.99	2863.35	3780.49	937.3	0.352591	0.0379075
12	18KH1-649	1442	750	0.520111	1.55185	3.70091	0.1216	3.1969	0.863813	8.22368	3.1969	0.0926	1.86457	739.8	3.1969	1478.9	1.86457	0.500237		18KH1-649	0	40.2936	1.2931	1.75055	20.2703	6.03908	56.2814	102.493	198.374	369.963	775	1400.81	2142.86	3495.93	1545	0.178796	0.0262647
12	18KH1-656	542	160.4	0.295941	2.63762	8.9998	0.188	8.81595	0.979572	5.31915	8.81595	0.1018	1.80979	1110.5	8.81595	1656.4	1.80979	0.67043		18KH1-656	0	3.81729	3.87931	7.65864	82.4324	1.95382	260.302	620.499	1065.04	1813.19	2556.25	3910.93	5211.18	5081.3	1143.3	0.0133382	0.0499506
12	18KH1-659	141.9	119.1	0.839323	2.74178	6.31021	0.213	5.65333	0.895902	4.69484	5.65333	0.0934	2.80332	1244.8	5.65333	1495.2	2.80332	0.832531		18KH1-659	0	29.8532	0	0.919037	23.6486	0	42.2111	75.0693	178.862	320.513	450	987.854	1534.16	2178.86	937.3	0	0.0275141
12	18KH1-670	182.7	95.6	0.523262	1.81465	10.4899	0.133	10.0414	0.957247	7.5188	10.0414	0.099	3.03441	805	10.0414	1604.5	3.03441	0.501714		18KH1-670	0	13.0506	2.47845	4.20131	34.4595	15.8082	242.211	556.787	1048.78	1908.42	3143.75	4336.03	7068.32	7276.42	1054.72	0.173034	0.0342671
12	18KH1-671	392	16.8	0.0428571	0.608031	8.72707	0.0544	8.23224	0.943299	18.3823	8.23224	0.0811	2.8969	341.5	8.23224	1223	2.8969	0.279231		18KH1-671	0	0.946166	0	3.50109	13.5135	0	82.9146	107.479	182.927	245.421	429.375	700.405	1155.28	1479.67	1390.5	0	0.0717701
12	18KH1-672	289.5	141.6	0.489119	0.785658	13.44	0.0653	13.0677	0.972301	15.3139	13.0677	0.0873	3.14137	407.8	13.0677	1366.3	3.14137	0.29847		18KH1-672	1.30802	81.4029	10.6681	15.3173	106.081	62.3446	417.085	800.554	1288.62	2362.64	3737.5	4417	6807.45	7520.33	1300.89	0.296393	0.0612689
12	18KH1-673	215.8	72.8	0.337349	0.468286	7.66892	0.0387	6.37268	0.830975	25.8398	6.37268	0.0878	4.26629	244.77	6.37268	1377.2	4.26629	0.17773		18KH1-673	0	11.9086	1.50862	3.28228	22.973	11.9005	125.628	240.997	398.374	798.535	1206.25	1534.41	2366.46	2922.76	1088.71	0.221521	0.053087
12	18KH1-674	554	55.2	0.099639	1.05642	5.84592	0.0847	5.57345	0.953391	11.8064	5.57344	0.0905	1.76394	524.1	5.57344	1435.2	1.76394	0.365176		18KH1-674	0.485232	5.1876	1.72414	0.393873	8.78378	4.26288	109.548	265.928	577.236	1291.21	2181.25	3441.3	5322.98	7560.98	1720.1	0.137423	0.0205801
12	18KH1-677	1078	18.2	0.0168831	0.948408	8.75291	0.0736	8.60126	0.982675	13.587	8.60126	0.0935	1.62226	457.8	8.60126	1497.2	1.62226	0.305771		18KH1-677	0	1.54976	1.2931	0	2.7027	0	12.5628	33.518	73.5772	217.949	531.25	1020.24	2031.06	3699.19	1493.5	0	0.00618536
12	18KH1-678	233	81.6	0.350215	1.10048	5.24747	0.0776	4.83471	0.921342	12.8866	4.83471	0.1029	2.03997	481.8	4.83471	1676.2	2.03997	0.287436		18KH1-678	0.28692	33.4421	6.46552	12.4726	65.5405	55.0622	256.281	396.122	540.65	842.491	1331.25	1627.53	2335.4	2577.24	1072.23	0.424854	0.109738
12	18KH1-679	546	558	1.02198	0.905176	7.1655	0.0702	6.94464	0.969176	14.245	6.94464	0.09356	1.76536	437.4	6.94464	1498.4	1.76536	0.291911		18KH1-679	9.2827	120.718	43.1034	45.9519	87.8378	40.8526	219.598	664.82	1178.86	2673.99	3812.5	4489.88	7826.09	8983.74	1060.9	0.294147	0.0280597
12	18KH1-682	966	57.7	0.0597308	0.232857	14.8552	0.0176	13.829	0.930917	56.8182	13.829	0.096	5.4256	112.47	13.829	1546.9	5.4256	0.0727067		18KH1-682	0	0.978793	0	0	23.6486	0	117.085	326.87	689.024	1630.04	2668.75	4412.96	4968.94	6341.46	1369.9	0	0.0235634
12	18KH1-683	336.9	203.5	0.604037	0.871641	5.76461	0.0683	5.35113	0.928272	14.6413	5.35113	0.0926	2.14387	425.9	5.35113	1478.9	2.14387	0.287984		18KH1-683	0.172996	11.2561	4.52586	11.8162	71.6216	22.3801	386.935	709.141	1174.8	2227.11	3068.75	3995.95	5962.73	6869.92	1118.58	0.134438	0.0648922
12	18KH1-684	1135	457	0.402643	1.94218	5.23668	0.1443	4.9961	0.954059	6.93001	4.9961	0.09766	1.56901	868.9	4.9961	1579.1	1.56901	0.55025		18KH1-684	0	9.6248	0.818966	5.47046	24.3243	4.4405	215.075	509.695	987.805	2179.49	3243.75	4246.96	6527.95	8048.78	1411.1	0.0613926	0.0329468
12	18KH1-685	327.6	166.6	0.508547	0.766778	9.72725	0.059	9.43711	0.970173	16.9491	9.43711	0.0943	2.35804	369.5	9.43711	1513.3	2.35804	0.244168		18KH1-685	0.0801688	10.9299	6.46552	11.5974	52.027	7.81528	232.161	434.903	703.252	1373.63	1968.75	2955.47	4658.39	5162.6	1133	0.0711108	0.0498372
12	18KH1-687	22.2	11.5	0.518018	2.7393	7.33317	0.211	6.57644	0.896808	4.73934	6.57644	0.0942	3.24434	1234.1	6.57644	1511.3	3.24434	0.816582		18KH1-687	0	3.34421	0	0	0	35.524	73.8693	166.205	293.496	445.055	712.5	1145.75	1621.12	1536.59	782.8	#DIV/0!	0.0455669
12	18KH1-689	333	461	1.38438	2.12085	4.56351	0.1625	4.14318	0.907895	6.15385	4.14318	0.0947	1.91302	970.7	4.14318	1521.3	1.91302	0.638073		18KH1-689	0.350211	67.6998	4.52586	9.40919	46.6216	42.8064	127.638	185.596	276.829	424.908	650	890.688	1360.25	1597.56	1036.18	0.554913	0.0938345
12	18KH1-690	394	491.7	1.24797	3.01869	3.6438	0.2228	3.24496	0.890541	4.48833	3.24496	0.09831	1.65757	1296.7	3.24496	1591.5	1.65757	0.814766		18KH1-690	0	18.7602	6.03448	7.65864	38.5135	65.0089	132.663	208.31	386.179	725.275	1150	1829.96	3360.25	4308.94	827.09	0.909475	0.0394802
12	18KH1-691	87.2	78	0.894495	2.86375	5.39534	0.234	4.85313	0.899503	4.2735	4.85313	0.0888	2.35731	1355.4	4.85313	1399	2.35731	0.968835		18KH1-691	0	15.8238	0	1.07221	6.55405	3.01954	33.1658	85.5956	153.252	331.502	612.5	975.709	1863.35	2597.56	1044.42	0.204805	0.017799
12	18KH1-692	258	73.1	0.283333	2.01902	4.99001	0.141	4.5283	0.907474	7.0922	4.5283	0.1039	2.09634	850.3	4.5283	1694.1	2.09634	0.501918		18KH1-692	-0.0385654	42.0881	0	2.10066	12.1622	13.4991	37.6884	83.6565	156.911	346.154	536.875	866.397	1472.05	2024.39	1086.65	0.630515	0.0256027
12	18KH1-693	273.3	201.4	0.736919	0.191258	15.1972	0.0152	14.6553	0.964339	65.7895	14.6553	0.0913	4.02225	97.25	14.6553	1452	4.02225	0.0669766		18KH1-693	0.0464135	13.54	1.50862	10.5033	125	19.3606	316.08	714.681	1016.26	1758.24	2900	3886.64	5652.17	6300.81	1174.2	0.0974012	0.0559219
12	18KH1-695	100.6	88.9	0.883698	2.6929	4.79741	0.1952	4.26027	0.888034	5.12295	4.26027	0.1001	2.20574	1149.5	4.26027	1625.1	2.20574	0.707341		18KH1-695	0.0337553	41.1093	0.517241	1.31291	27.7027	7.1048	84.9246	201.939	371.545	686.813	1068.75	1493.93	2223.6	2841.46	1050.6	0.146478	0.0381924
12	18KH1-696	227.6	190	0.834798	0.52287	8.57939	0.0416	8.2594	0.962702	24.0385	8.25939	0.0912	2.32126	262.7	8.25939	1449.9	2.32126	0.181185		18KH1-696	0	28.385	0	0	12.3649	4.08526	42.7136	125.762	182.927	401.099	700	1105.26	2031.06	2691.06	1005.28	0.177763	0.0210302
12	18KH1-700	357.3	180.7	0.505737	1.65899	7.92149	0.1292	7.70427	0.972578	7.73994	7.70427	0.09317	1.84236	783.3	7.70427	1490.5	1.84236	0.525528		18KH1-700	0	9.93475	3.34052	7.00219	48.6486	15.6306	247.236	609.418	1036.59	1826.01	3081.25	3736.84	5422.36	6422.76	1293.68	0.142522	0.0455957
12	18KH1-705	66.2	92.5	1.39728	3.40274	4.0226	0.2499	3.35386	0.833753	4.0016	3.35386	0.0988	2.22103	1438	3.35386	1600.8	2.22103	0.898301		18KH1-705	0.0337553	148.45	7.00431	17.9431	89.1892	45.8259	311.558	534.626	747.967	1320.51	1931.25	2542.51	3677.02	4081.3	901.25	0.274907	0.0847311
12	18KH1-706	752	110.8	0.14734	3.01346	4.79695	0.2244	4.5079	0.939743	4.45633	4.5079	0.09744	1.63999	1305.1	4.5079	1574.9	1.63999	0.828688		18KH1-706	0	10.7667	-0.542026	0.656455	4.66216	0	40.201	116.898	251.22	507.326	1056.25	1696.36	3204.97	4536.59	1547.06	0	0.0125433
12	18KH1-709	65.5	59.6	0.909924	2.41494	5.52902	0.1831	4.79322	0.86692	5.4615	4.79322	0.0957	2.75592	1083.9	4.79322	1541	2.75592	0.703374		18KH1-709	0	24.9592	1.2931	4.15755	27.7027	18.8277	123.618	260.388	436.179	761.905	1175	1591.09	2416.15	2817.07	953.78	0.321733	0.0511633
12	18KH1-710	325.8	242.1	0.743094	3.48625	3.78775	0.2558	3.3985	0.897234	3.9093	3.3985	0.09889	1.6725	1468.3	3.3985	1602.5	1.6725	0.916256		18KH1-710	0	45.3507	4.52586	12.6915	56.7568	11.5453	147.739	277.008	417.886	815.018	1118.75	1587.04	2329.19	2796.75	958.93	0.126081	0.0634291
12	18KH1-711	115.6	105.4	0.911765	1.33426	10.4391	0.0995	10.2121	0.978259	10.0503	10.2121	0.0973	2.16495	611.5	10.2121	1572.2	2.16495	0.388945		18KH1-711	0.590717	20.8809	4.9569	14.0044	53.3784	22.7353	260.302	465.374	776.423	1615.38	2281.25	3263.16	4378.88	5284.55	1196.86	0.192877	0.0594447
12	18KH1-712	305.8	225.5	0.73741	1.84235	4.15392	0.1417	3.80771	0.916656	7.05716	3.80771	0.09434	1.66023	854.3	3.80771	1514.1	1.66023	0.56423		18KH1-712	0	37.1941	6.25	15.3173	78.3784	14.5648	422.111	797.784	1394.31	2326.01	3312.5	4259.11	5881.99	6747.97	1061.93	0.0800745	0.0717633
12	18KH1-714	223.6	63.4	0.283542	3.24727	6.32834	0.238	5.92667	0.93653	4.20168	5.92667	0.099	2.21864	1376.3	5.92667	1604.5	2.21864	0.857775		18KH1-714	0	11.5824	0.75431	3.50109	23.6486	12.9663	47.2362	108.033	244.715	606.227	906.25	1676.11	2329.19	3065.04	1019.7	0.387948	0.0202801
12	18KH1-715	167.2	164.4	0.983254	2.78186	4.43757	0.2173	4.03343	0.908928	4.60193	4.03343	0.09289	1.85026	1267.6	4.03343	1484.8	1.85026	0.853718		18KH1-715	0	71.4519	1.72414	4.814	35.1351	10.8348	126.633	241.274	439.024	820.513	1250	1793.52	2745.34	2926.83	1178.32	0.162434	0.0461266
12	18KH1-717	550.9	808	1.46669	1.13177	4.73128	0.0869	4.14825	0.876771	11.5075	4.14825	0.0945	2.27532	537.2	4.14825	1517.3	2.27532	0.35405		18KH1-717	0	61.1746	0.969828	15.5361	33.7838	22.3801	143.216	238.227	430.894	739.927	1093.75	1574.9	2217.39	3089.43	1163.9	0.321745	0.0645876
12	18KH1-719	624	17.2	0.0275641	0.381017	14.7621	0.0296	14.3744	0.973734	33.7838	14.3744	0.0934	3.36118	188	14.3744	1495.2	3.36118	0.125736		18KH1-719	0.164557	0.244698	0	5.03282	30.4054	0	56.2814	174.515	257.317	346.154	393.75	514.17	627.329	686.992	1390.5	0	0.0897159
12	18KH1-723	221.1	276.2	1.24921	2.73584	4.73789	0.2218	4.31586	0.910924	4.50857	4.31586	0.0895	1.95473	1291.4	4.31586	1414	1.95473	0.913296		18KH1-723	0	78.1403	1.18534	5.47046	51.3514	9.05861	174.372	362.881	642.276	1142.86	1643.75	2421.05	3714.29	4182.93	1147.42	0.0957299	0.0469463
12	18KH1-724	771	545	0.706874	0.83239	6.43352	0.0645	6.18035	0.960647	15.5039	6.18034	0.09364	1.78706	402.9	6.18034	1500	1.78706	0.2686		18KH1-724	0	15.4976	-0.264009	7.00219	20.2703	8.70337	100	199.446	316.26	798.535	1437.5	2303.64	4024.84	5162.6	1129.91	0.193312	0.0248457
12	18KH1-726	349	20.7	0.0593123	0.0923937	11.6159	0.00966	9.7976	0.843466	103.52	9.7976	0.0694	6.23984	61.97	9.7976	909.7	6.23984	0.0681214		18KH1-726	0	3.68679	2.15517	5.03282	18.9189	3.37478	27.1357	100.277	217.48	496.337	925	1672.06	3173.91	3796.75	1369.9	0.148945	0.0085496
12	18KH1-727	142.3	178.7	1.2558	1.59801	9.18412	0.127	8.96159	0.97577	7.87402	8.96159	0.0913	2.00946	770.7	8.96159	1452	2.00946	0.530785		18KH1-727	0	52.3654	4.9569	15.9737	80.4054	50.7993	242.211	429.363	743.902	1428.57	2131.25	3097.17	4881.99	6341.46	993.95	0.364014	0.0496132
12	18KH1-728	194.3	72	0.370561	1.11396	7.63217	0.0835	7.31699	0.958704	11.9761	7.31699	0.0968	2.17063	517	7.31699	1562.5	2.17063	0.33088		18KH1-728	0.970464	29.8532	7.11207	11.5974	91.2162	25.9325	209.548	423.823	715.447	1269.23	1825	2449.39	3559.01	4178.86	1194.8	0.187572	0.0588782
12	18KH1-732	273.7	79.7	0.291195	3.45611	3.89529	0.2415	3.509	0.90083	4.14079	3.50899	0.10384	1.69123	1394.5	3.50899	1693	1.69123	0.823686		18KH1-732	0	16.9657	2.37069	4.61707	36.4865	5.68384	161.307	335.18	512.195	1016.48	1506.25	1797.57	2633.54	2959.35	1105.19	0.0740883	0.0612508
12	18KH1-733	145.1	157	1.08201	1.46115	9.13532	0.114	8.89886	0.974116	8.77193	8.89886	0.093	2.06504	695.9	8.89886	1487	2.06504	0.467989		18KH1-733	0.0759494	48.7765	4.31034	11.1597	69.5946	28.4192	224.623	459.834	719.512	1252.75	1887.5	2497.98	3434.78	4048.78	1121.67	0.227299	0.0653966
12	18KH1-734	251.1	297.9	1.18638	0.62383	12.8606	0.0472	12.5015	0.972081	21.1864	12.5015	0.0959	3.01765	297.3	12.5015	1545	3.01765	0.192427		18KH1-734	0	61.5008	1.50862	8.53392	53.3784	46.8917	202.513	390.582	756.098	1468.86	2181.25	3024.29	4639.75	5609.76	1174.2	0.451011	0.0436473
12	18KH1-735	331.1	222.1	0.670794	3.2378	4.17253	0.2359	3.82172	0.915925	4.23908	3.82172	0.09959	1.67465	1365.3	3.82172	1615.6	1.67465	0.845073		18KH1-735	0.0337553	35.8891	3.125	5.9081	43.9189	2.13144	187.94	301.939	601.626	1032.97	1493.75	2251.01	3099.38	3581.3	1205.1	0.0234605	0.0606379
12	18KH1-736	430.2	280.9	0.652952	1.71248	4.61056	0.1311	4.25941	0.923838	7.62777	4.25941	0.09478	1.76484	794.1	4.25941	1522.9	1.76484	0.521439		18KH1-736	0	23.9804	0.646552	2.36324	31.7568	26.643	127.136	229.917	422.764	835.165	1256.25	1943.32	2975.16	3861.79	1025.88	0.419306	0.0427325
12	18KH1-737	375	174.4	0.465067	0.956079	12.2841	0.0759	12.0787	0.98328	13.1752	12.0787	0.0914	2.2369	471.6	12.0787	1454.1	2.2369	0.324324		18KH1-737	0.383966	12.7243	8.0819	17.5055	105.405	14.7425	366.834	736.842	1520.33	2893.77	4618.75	6275.3	8695.65	10975.6	1261.75	0.0749727	0.0421859
12	18KH1-738	187	86.6	0.463102	2.2072	4.49866	0.1564	4.09556	0.910395	6.39386	4.09556	0.1024	1.86128	936.7	4.09556	1667.2	1.86128	0.56184		18KH1-738	0	14.1925	0.398707	2.42888	18.2432	8.70337	86.9347	151.801	244.309	459.707	668.75	923.077	1354.04	1585.37	945.54	0.218545	0.064204
12	18KH1-740	243.7	213.5	0.876077	2.25643	6.88415	0.177	6.62664	0.962594	5.64972	6.62664	0.0925	1.86524	1050.6	6.62664	1476.8	1.86524	0.711403		18KH1-740	0.0421941	80.0979	0.18319	7.00219	54.0541	22.3801	243.719	462.604	910.569	1679.49	2443.75	3234.82	4757.76	4837.4	887.86	0.194986	0.0512254
12	18KH1-741	300.5	123.7	0.411647	2.83658	4.117	0.2079	3.69039	0.896379	4.81001	3.69039	0.099	1.82502	1217.6	3.69039	1604.5	1.82502	0.758866		18KH1-741	0	13.0669	0.560345	2.6477	16.8919	12.611	96.4824	189.474	324.797	663.004	1075	1587.04	2552.8	3223.58	831.21	0.312383	0.0377948
12	18KH1-742	184	259	1.40761	2.77358	3.94955	0.2039	3.4708	0.878784	4.90437	3.4708	0.0987	1.8848	1196.2	3.4708	1598.9	1.8848	0.748139		18KH1-742	70.4641	262.643	377.155	258.206	200.676	134.991	522.613	792.244	1252.03	2073.26	2843.75	3497.98	4782.61	5691.06	780.74	0.416838	0.109274
12	18KH1-743	522	649	1.2433	2.83439	3.21083	0.2166	2.7846	0.867253	4.61681	2.7846	0.09495	1.59857	1263.9	2.7846	1526.2	1.59857	0.828135		18KH1-743	0.206751	92.8222	14.4397	35.0109	187.162	28.4192	557.789	867.036	1560.98	2747.25	4137.5	5910.93	8509.32	9552.85	889.92	0.0879564	0.0655504
12	18KH1-744	455.2	362.4	0.796134	1.2425	5.11048	0.0948	4.71321	0.922264	10.5485	4.71321	0.0951	1.9755	583.9	4.71321	1529.2	1.9755	0.381834		18KH1-744	-0.0907173	72.1044	0.269397	3.23851	27.7027	5.68384	92.4623	221.607	434.146	974.359	1687.5	2437.25	4155.28	4756.1	1204.07	0.112305	0.0222518
12	18KH1-746	252	127.9	0.50754	3.53761	4.73241	0.2611	4.36939	0.923291	3.82995	4.36939	0.09831	1.81772	1495.5	4.36939	1591.5	1.81772	0.93968		18KH1-746	0	57.9119	1.00216	2.49453	13.5135	6.57194	81.407	149.584	270.732	560.44	943.75	1522.27	2534.16	3487.8	1254.54	0.198143	0.0321239
12	18KH1-750	310	25.5	0.0822581	2.36281	4.75019	0.182	4.24795	0.89427	5.49451	4.24795	0.0942	2.12584	1077.9	4.24795	1511.3	2.12584	0.713227		18KH1-750	0	5.02447	0	0.371991	3.37838	4.79574	64.3216	180.332	378.455	1097.07	2125	3700.4	6304.35	8455.28	1446.12	0.325329	0.0102027
12	18KH1-751	290.4	167.9	0.578168	1.88742	7.44921	0.1471	7.11227	0.954769	6.7981	7.11228	0.0931	2.21501	884.7	7.11228	1489.1	2.21501	0.594117		18KH1-751	-0.0367511	66.0685	0.862069	4.814	30.4054	6.39432	151.759	326.87	589.431	1075.09	1668.75	2165.99	2863.35	3390.24	1297.8	0.094133	0.0530004
12	18KH1-752	261	212.6	0.814559	6.34838	6.40208	0.321	6.06084	0.946698	3.11526	6.06084	0.1435	2.06225	1794.6	6.06084	2269.1	2.06225	0.790886		18KH1-752	0.0759494	31.8108	1.8319	6.56455	67.5676	9.59147	120.603	246.537	419.512	659.341	1062.5	1267.21	1795.03	2130.08	996.01	0.106252	0.0671871
12	18KH1-753	60.9	44.1	0.724138	0.951548	6.46866	0.0714	4.54628	0.702817	14.0056	4.54628	0.0967	4.60162	444.58	4.54628	1560.6	4.60162	0.284878		18KH1-753	0	22.8385	7.75862	6.34573	24.3243	22.913	111.055	204.986	341.463	609.89	1125	1518.22	2478.26	3252.03	927	0.44085	0.0448118
12	18KH1-754	215.9	113	0.52339	0.622042	7.72674	0.0425	7.20073	0.931924	23.5294	7.20073	0.1062	2.80213	268.31	7.20073	1734.4	2.80213	0.154699		18KH1-754	0	41.925	0.689655	1.61926	20.9459	9.76909	108.04	222.438	382.52	716.117	1181.25	1708.5	2683.23	3093.5	1106.22	0.205358	0.040265
12	18KH1-755	528	527.5	0.999053	2.20865	3.77248	0.1643	3.3937	0.899593	6.08643	3.3937	0.09754	1.64755	980.6	3.3937	1576.8	1.64755	0.621892		18KH1-755	0	137.684	1.8319	3.50109	16.8919	9.23623	135.176	293.629	581.301	1172.16	1925	2793.52	4546.58	5569.11	999.1	0.193289	0.0297313
12	18KH1-757	90	127	1.41111	2.14239	4.26186	0.1596	3.78618	0.888387	6.26566	3.78618	0.0974	1.95661	954.6	3.78618	1574.1	1.95661	0.606442		18KH1-757	0	81.8923	0.668103	8.09628	49.3243	31.4387	190.955	332.41	589.431	1097.07	1606.25	1906.88	3024.84	3552.85	922.88	0.323943	0.0631288
12	18KH1-758	207	114.3	0.552174	2.71618	7.33641	0.207	7.14367	0.973728	4.83092	7.14367	0.09521	1.67061	1212.8	7.14367	1531.4	1.67061	0.791955		18KH1-758	0	56.6069	1.32543	3.32604	16.8919	8.34813	128.141	254.848	422.764	877.289	1387.5	1987.85	2888.2	3560.98	1210.25	0.179435	0.044367
12	18KH1-760	153	36.5	0.238562	2.52496	9.19653	0.186	8.90432	0.968227	5.37634	8.90432	0.0985	2.2998	1099.7	8.90432	1595.1	2.2998	0.689424		18KH1-760	0	8.31974	0	0	17.5676	0	32.1608	50.4155	126.829	223.443	356.25	566.802	993.789	1418.7	1225.7	0	0.0323618
12	18KH1-761	210.9	223.1	1.05785	2.81857	4.80359	0.2055	4.47979	0.932592	4.86618	4.47979	0.09952	1.73377	1204.8	4.47979	1614.3	1.73377	0.74633		18KH1-761	0	84.8287	2.04741	6.34573	42.5676	31.4387	144.724	329.64	556.911	1071.43	1525	2064.78	3012.42	3382.11	1050.6	0.400549	0.0480423
12	18KH1-762	283.6	248.8	0.877292	1.09585	11.0034	0.0845	10.7807	0.979761	11.8343	10.7807	0.0941	2.20259	522.9	10.7807	1509.3	2.20259	0.346452		18KH1-762	0.109705	83.6868	3.34052	3.41357	33.1081	16.8739	133.166	329.64	638.211	1249.08	2125	2769.23	4434.78	4699.19	1275.14	0.254127	0.0300276
12	18KH1-763	1030	93.2	0.0904854	0.632772	11.7787	0.0544	11.2667	0.956528	18.3823	11.2667	0.0844	3.43516	341.5	11.2667	1300.9	3.43516	0.262511		18KH1-763	0	3.26264	0	2.58206	12.1622	0	82.9146	182.825	434.959	855.311	1518.75	2469.64	4310.56	4837.4	1483.2	0	0.0192352
12	18KH1-764	107.7	96.2	0.893222	1.66927	6.62289	0.1241	5.72046	0.86374	8.05802	5.72046	0.0976	3.33753	754.1	5.72046	1577.9	3.33753	0.477914		18KH1-764	0	25.7749	1.45474	4.59519	12.8378	5.50622	63.3166	149.584	261.789	532.967	806.25	1165.99	1875.78	2373.98	1093.86	0.19313	0.0337549
12	18KH1-765	679	13	0.0191458	2.19413	5.98369	0.1803	5.59702	0.935379	5.54631	5.59702	0.0883	2.11611	1068.6	5.59702	1388.2	2.11611	0.769774		18KH1-765	0.0295359	0.45677	0	0	12.1622	0	96.9849	246.537	368.699	362.637	365	291.093	286.957	320.325	1514.1	0	0.337978
12	18KH1-768	274	306	1.11679	2.38864	7.2008	0.182	6.98305	0.969761	5.49451	6.98305	0.09523	1.7574	1077.9	6.98305	1531.8	1.7574	0.703682		18KH1-768	0	38.3361	2.47845	5.9081	34.4595	23.4458	124.623	239.889	397.561	752.747	1362.5	1995.95	2925.47	3695.12	1000.13	0.357777	0.0425994
12	18KH1-769	264.2	445	1.68433	0.121201	11.3753	0.01012	9.95318	0.874984	98.8142	9.95318	0.0869	5.50735	64.91	9.95318	1357.4	5.50735	0.0478194		18KH1-769	0.0379747	73.5726	2.15517	5.03282	62.8378	78.508	237.688	421.053	723.577	1183.15	1850	2619.43	3751.55	4256.1	958.93	0.642391	0.0633573
12	18KH1-772	339	108.8	0.320944	3.11902	4.89417	0.2457	4.5339	0.926388	4.07	4.5339	0.09211	1.843	1416.3	4.5339	1468.8	1.843	0.964257		18KH1-772	0	10.2773	0.969828	3.04158	25	10.8348	148.744	354.571	540.65	1034.8	1631.25	2117.41	3186.34	3780.49	1133	0.177677	0.0466818
12	18KH1-773	757	265	0.350066	2.71609	6.17004	0.219	5.94259	0.963137	4.56621	5.94259	0.08999	1.6598	1276.6	5.94259	1424.5	1.6598	0.896174		18KH1-773	0.21097	13.0506	3.44828	7.43982	45.2703	5.15098	227.136	462.604	682.927	1243.59	1762.5	2291.5	3534.16	4113.82	1133	0.0507973	0.0642686
12	18KH1-774	302.5	438	1.44793	2.46448	6.26126	0.199	5.98705	0.956205	5.02513	5.98705	0.08986	1.83265	1169.9	5.98705	1421.7	1.83265	0.822888		18KH1-774	0	49.1028	1.61638	4.37637	42.5676	7.46004	221.106	307.479	695.122	1236.26	1731.25	2149.8	3913.04	4593.5	1246.3	0.0768956	0.0565047
12	18KH1-775	405	175.2	0.432593	2.68475	5.50906	0.214	5.20826	0.945398	4.6729	5.20826	0.09103	1.7955	1250.1	5.20826	1446.4	1.7955	0.864284		18KH1-775	2.32068	18.5971	12.931	9.84683	26.3514	7.1048	163.317	362.881	646.341	1293.04	1875	2919.03	4677.02	5813.01	1184.5	0.108302	0.034919
12	18KH1-777	224.2	134.8	0.601249	2.42739	7.50876	0.19	7.21834	0.961322	5.26316	7.21834	0.0927	2.0681	1121.4	7.21834	1480.9	2.0681	0.757242		18KH1-777	0	16.8026	0	1.50985	21.6216	4.4405	138.693	332.41	581.301	1142.86	1562.5	2493.93	3043.48	3943.09	1246.3	0.0810885	0.0455707
12	18KH1-778	1209	83.7	0.0692308	0.684018	9.42207	0.0564	8.98723	0.953849	17.7305	8.98723	0.088	2.82933	353.7	8.98723	1381.6	2.82933	0.256008		18KH1-778	0	1.41925	1.8319	9.62801	49.3243	4.4405	109.548	168.975	239.837	562.271	875	1591.09	2819.88	3739.84	1472.9	0.0604087	0.0388484
12	18KH1-780	180.7	202.6	1.1212	1.16027	5.80303	0.0947	5.37446	0.926146	10.5597	5.37446	0.0889	2.1887	583.3	5.37446	1401.1	2.1887	0.416316		18KH1-780	0.548523	34.7471	3.34052	6.12691	25	9.59147	94.4724	196.676	335.772	668.498	1150	1550.61	2378.88	2987.8	1037.21	0.197362	0.0397129
12	18KH1-784	180.6	157.8	0.873754	3.53029	3.67592	0.2559	2.99274	0.814147	3.90778	2.99274	0.1001	2.13446	1468.8	2.99274	1625.1	2.13446	0.903821		18KH1-784	0	65.2529	2.04741	5.47046	39.1892	10.6572	120.101	296.399	491.87	967.033	1500	2129.55	2881.99	3963.41	1266.9	0.155341	0.0416728
12	18KH1-785	425.9	63.6	0.149331	0.619838	6.8038	0.0591	6.19569	0.910622	16.9205	6.19569	0.0761	2.8116	370.1	6.19569	1096.8	2.8116	0.337436		18KH1-785	0	1.46819	1.50862	2.84464	45.9459	0	80.9045	120.776	110.569	89.7436	62.5	75.7085	65.8385	81.3008	1359.6	0	1.22883
12	18KH1c_102	460	466	1.01304	0.49163	10.3836	0.0486	10.1408	0.976617	20.5761	10.1408	0.0734	2.23231	305.9	10.1408	1024.1	2.23231	0.298701		18KH1c_102	-2.44726	6.6721	-133.621	9.19037	72.973	7.28242	103.518	93.6288	65.8537	61.1722	48.125	54.251	60.2484	57.7236	1384.32	0.0837891	1.71818
12	18KH1c_104	179.7	162.7	0.905398	0.99907	6.09796	0.0863	5.69909	0.934589	11.5875	5.69909	0.084	2.16922	533.6	5.69909	1291.7	2.16922	0.413099		18KH1c_104	-2.1097	66.2316	-10.7759	1.55361	21.6216	14.032	107.035	171.745	314.634	631.868	993.75	1364.37	2440.99	2593.5	1101.07	0.291683	0.043849
12	18KH1c_108	387	275.5	0.711886	0.185372	11.8618	0.0147	11.1247	0.937864	68.0272	11.1247	0.0915	4.11607	94.07	11.1247	1456.2	4.11607	0.0645996		18KH1c_108	0.0207595	3.47471	-105.603	8.75274	62.1622	1.22558	94.9749	83.6565	58.9431	71.0623	55	46.9636	68.323	56.9106	1283.38	0.0159505	1.39009
12	18KH1c_112	206	65.1	0.316019	2.7815	6.98174	0.224	6.65977	0.953884	4.46429	6.65977	0.0901	2.09576	1303	6.65977	1426.8	2.09576	0.913232		18KH1c_112	-168.776	57.2594	-1206.9	19.0372	55.4054	11.3677	192.965	232.687	457.724	849.817	1468.75	1765.18	2484.47	3317.07	1117.55	0.10994	0.0776683
12	18KH1c_113	50.5	48.9	0.968317	1.80915	11.3126	0.147	10.4601	0.924638	6.80272	10.4601	0.0893	4.30839	884.1	10.4601	1409.7	4.30839	0.627155		18KH1c_113	0.0221097	24.7961	-10.7759	2.62582	17.6351	19.5382	103.015	237.95	376.423	683.15	1050	1469.64	2285.71	2939.02	978.5	0.4584	0.0450691
12	18KH1c_115	252.3	56.7	0.224732	3.64402	5.0325	0.276	4.60155	0.914366	3.62319	4.60155	0.0958	2.0376	1571.2	4.60155	1543	2.0376	1.01828		18KH1c_115	-0.843882	32.6264	-92.6724	1.90372	15.8784	8.70337	87.4372	175.346	279.268	620.879	1112.5	1562.75	2652.17	3361.79	1182.44	0.23358	0.0329681
12	18KH1c_116	316.5	273.8	0.865087	1.9	8.59224	0.151	8.27316	0.962863	6.62252	8.27316	0.0913	2.31981	906.6	8.27316	1452	2.31981	0.62438		18KH1c_116	-0.421941	50.2447	-25.8621	2.60394	12.4324	13.3215	81.407	180.055	257.724	478.022	837.5	1068.83	1826.09	2504.07	1179.35	0.418739	0.04458
12	18KH1c_117	60.1	36.2	0.602329	1.62405	12.1273	0.12	11.8912	0.980533	8.33333	11.8912	0.0982	2.38123	730.6	11.8912	1589.4	2.38123	0.45967		18KH1c_117	0.0203797	7.27569	0.300647	1.88184	20.2703	9.76909	80.402	160.665	254.878	467.033	746.25	1036.44	1596.27	2024.39	820.91	0.241986	0.0503686
12	18KH1c_119	118.2	169.8	1.43655	3.1191	5.52339	0.24	5.12805	0.928425	4.16667	5.12805	0.0943	2.05204	1386.7	5.12805	1513.3	2.05204	0.916342		18KH1c_119	-1.85654	59.5432	-30.1724	1.81619	26.4189	27.7087	185.427	412.742	743.902	1366.3	2175	3251.01	4925.47	6292.68	969.23	0.395888	0.0376466
12	18KH1c_122	472	215.3	0.456144	2.06648	9.80601	0.151	9.55255	0.974153	6.62252	9.55255	0.0993	2.21509	906.6	9.55255	1610.2	2.21509	0.563036		18KH1c_122	-1.30802	35.5628	-60.3448	2.62582	19.5946	12.611	143.719	296.399	609.756	1307.69	2437.5	3684.21	5639.75	8048.78	1462.6	0.237643	0.0254831
12	18KH1c_123	451	129.1	0.286253	3.65582	6.27204	0.281	5.81249	0.92673	3.55872	5.81249	0.0944	2.35658	1596.4	5.81249	1515.3	2.35658	1.05352		18KH1c_123	0.0222363	15.1713	-48.4914	0.59081	19.7297	1.15453	62.8141	160.665	286.179	527.473	981.25	1603.24	2248.45	3036.59	1273.08	0.0327956	0.0279366
12	18KH1c_124	250.9	180.3	0.718613	1.53023	10.7885	0.117	10.5111	0.97429	8.54701	10.5111	0.0949	2.43064	713.3	10.5111	1525.2	2.43064	0.467676		18KH1c_124	-1.35021	46.4927	-26.9397	2.62582	31.7568	23.9787	208.04	423.823	813.008	1615.38	2650	3696.36	5459.63	6910.57	1088.71	0.295008	0.0381052
12	18KH1c_129	85.3	62.2	0.729191	3.75879	6.05075	0.288	5.69357	0.940969	3.47222	5.69357	0.0947	2.04814	1631.5	5.69357	1521.3	2.04814	1.07244		18KH1c_129	-0.464135	31.1582	-57.1121	3.06346	20.9459	2.84192	94.9749	174.515	263.415	501.832	756.25	1044.53	1559.01	1788.62	993.95	0.0637173	0.0609201
12	18KH1c_130	700	47	0.0671429	1.67097	8.75657	0.137	8.35213	0.953812	7.29927	8.35213	0.0885	2.6305	827.7	8.35213	1392.5	2.6305	0.594399		18KH1c_130	0.0221519	15.9869	-77.5862	0.743982	20.2703	3.19716	74.3719	185.596	276.423	468.864	750	991.903	1527.95	2601.63	1349.3	0.0823436	0.0486743
12	18KH1c_132	83.8	157.6	1.88067	2.81901	10.5244	0.219	10.3056	0.979212	4.56621	10.3056	0.0934	2.13476	1276.6	10.3056	1495.2	2.13476	0.853799		18KH1c_132	0.0205485	42.2512	-132.543	7.89934	49.3243	39.9645	143.719	254.848	320.325	681.319	987.5	1364.37	2049.69	2447.15	881.68	0.474665	0.0701173
12	18KH1c_133	307	155.3	0.505863	0.0755415	15.9465	0.00625	14.5825	0.914466	160	14.5825	0.0877	6.45295	40.16	14.5825	1375.1	6.45295	0.0292051		18KH1c_133	-2.36287	2.31648	-137.931	2.42888	13.0405	4.4405	51.2563	81.7175	134.959	236.264	362.5	518.219	1136.65	1345.53	1342.09	0.171755	0.0450943
12	18KH1c_134	1410	85.6	0.0607092	2.73826	8.90391	0.213	8.7581	0.983625	4.69484	8.7581	0.09328	1.60474	1244.8	8.7581	1492.7	1.60474	0.833925		18KH1c_134	-3.24895	13.0506	-52.8017	0.722101	4.7973	3.73002	25.1256	45.7064	84.9593	144.689	287.5	510.121	881.988	1552.85	1823.1	0.339746	0.0284875
12	18KH1c_136	111	89.7	0.808108	3.15871	9.3278	0.238	9.11837	0.977548	4.20168	9.11837	0.0963	1.9655	1376.3	9.11837	1552.8	1.9655	0.886334		18KH1c_136	0.0215612	52.3654	0.314655	1.24726	12.6351	3.19716	47.2362	122.438	217.073	371.795	596.875	939.271	1447.2	1971.54	1133	0.130869	0.0326396
12	18KH1c_137	434.8	27	0.0620975	0.641867	10.5622	0.0509	10.0889	0.955183	19.6464	10.0888	0.0915	3.12659	320	10.0888	1456.2	3.12659	0.21975		18KH1c_137	0.0209705	0.619902	0.306034	1.13786	33.7838	0.301954	103.518	105.263	63.8211	45.4212	23.6875	23.0769	19.2547	20.3252	1266.9	0.00510598	5.37624
12	18KH1c_138	93.4	74.3	0.795503	1.37948	8.18975	0.0993	7.79902	0.952291	10.0705	7.79903	0.1008	2.49943	610.3	7.79903	1638.1	2.49943	0.372566		18KH1c_138	0.0218143	12.0718	-86.2069	3.76368	20.9459	14.7425	151.759	288.089	455.691	835.165	1368.75	1619.43	2552.8	3016.26	997.04	0.261483	0.0594481
12	18KH1c_141	793	491	0.619168	0.657873	6.42216	0.0557	6.02205	0.937698	17.9533	6.02205	0.0857	2.23138	349.4	6.02205	1330.6	2.23138	0.262588		18KH1c_141	-1.39241	24.4698	-22.6293	2.27571	45.9459	6.57194	149.246	254.848	327.236	459.707	756.25	1129.55	1689.44	2276.42	1334.88	0.079363	0.0883406
12	18KH1c_145	430	26.6	0.0618605	0.285038	13.5743	0.0238	13.2267	0.974394	42.0168	13.2267	0.0869	3.05214	151.63	13.2267	1357.4	3.05214	0.111706		18KH1c_145	-0.92827	2.77325	0.321121	2.10066	11.8919	4.61812	63.3166	157.341	284.553	567.766	981.25	1619.43	2813.66	4012.2	1369.9	0.168299	0.0225032
12	18KH1c_146	204.8	137.4	0.670898	1.59515	9.4759	0.123	9.23411	0.974484	8.13008	9.23411	0.0941	2.12694	747.8	9.23411	1509.3	2.12694	0.495461		18KH1c_146	0.0210549	10.4405	-77.5862	2.01313	33.1081	9.41385	118.593	288.089	520.325	945.055	1468.75	2089.07	3260.87	3731.71	1037.21	0.150235	0.0363685
12	18KH1c_148	440.1	40.8	0.0927062	4.80372	5.13306	0.285	4.49298	0.875304	3.50877	4.49298	0.1223	2.48221	1616.5	4.49298	1989.2	2.48221	0.812638		18KH1c_148	-0.7173	5.38336	0.304957	1.05033	3.44595	4.4405	42.7136	64.2659	112.195	170.33	265.625	344.13	505.59	715.447	1181.41	0.366011	0.0844826
12	18KH1c_149	358	274.4	0.76648	7.00541	4.26059	0.346	3.92393	0.920983	2.89017	3.92393	0.14691	1.65994	1915.5	3.92393	2309.5	1.65994	0.8294		18KH1c_149	-3.75527	29.5269	-234.914	8.53392	56.0811	21.1368	254.271	401.662	585.366	996.337	1375	1979.76	2677.02	3146.34	1020.73	0.177003	0.094983
12	18KH1c_150	541.1	48.5	0.0896322	0.994274	6.95689	0.0864	6.65977	0.957291	11.5741	6.65977	0.0835	2.01143	534.2	6.65977	1280.1	2.01143	0.417311		18KH1c_150	0.0213502	1.33768	-62.5	1.88184	17.9054	1.59858	56.7839	139.058	226.423	492.674	787.5	1388.66	2024.84	2752.03	1323.55	0.0501337	0.0280436
12	18KH1c_154	245.1	58.8	0.239902	1.30592	6.84274	0.0985	6.51113	0.951538	10.1523	6.51113	0.0962	2.10435	605.6	6.51113	1550.8	2.10435	0.390508		18KH1c_154	-0.421941	13.2137	-47.4138	1.24726	25.6757	22.2025	137.186	260.388	487.805	793.04	1437.5	2145.75	3149.07	3784.55	955.84	0.374098	0.043564
12	18KH1c_158	230.5	127.4	0.552711	0.337452	10.1756	0.0263	9.78	0.961123	38.0228	9.78	0.0931	2.8097	167.35	9.78	1489.1	2.8097	0.112383		18KH1c_158	-0.379747	25.7749	-10.7759	1.77243	10.6757	1.95382	77.8894	177.008	382.114	620.879	1143.75	1570.85	2236.02	2792.68	1256.6	0.0677559	0.0348339
12	18KH1c_161	419	121	0.288783	2.49189	8.6467	0.21	8.41563	0.973276	4.7619	8.41563	0.0861	1.9856	1228.8	8.41563	1339.6	1.9856	0.917289		18KH1c_161	-3.12236	25.6117	-14.0086	3.17287	35.1351	19.3606	141.206	271.468	487.805	670.33	1050	1319.84	2180.12	2443.09	1333.85	0.274866	0.0647697
12	18KH1c_162	172.9	108.8	0.629265	3.07629	11.1487	0.233	10.9734	0.98427	4.29185	10.9734	0.0958	1.96963	1350.2	10.9734	1543	1.96963	0.875049		18KH1c_162	-1.4346	31.4845	-158.405	4.46389	43.9189	20.7815	222.613	432.133	658.537	1258.24	2081.25	3072.87	4490.68	5772.36	1118.58	0.210173	0.0495722
12	18KH1c_163	126	117.5	0.93254	0.0471779	14.7542	0.00389	9.28675	0.629431	257.069	9.28675	0.088	11.4648	25.03	9.28675	1382	11.4648	0.0181114		18KH1c_163	-0.506329	15.0082	-36.6379	3.32604	35.8108	19.8934	162.312	270.36	504.065	941.392	1543.75	2097.17	3018.63	3800.81	941.42	0.260932	0.0537699
12	18KH1c_164	402.2	15.9	0.0395326	0.692432	14.8225	0.0609	14.6318	0.987136	16.4204	14.6318	0.0825	2.36985	381.1	14.6318	1256.5	2.36985	0.303303		18KH1c_164	0.0214768	0.766721	-47.4138	0.678337	11.7568	1.45648	50.2513	114.958	241.463	547.619	937.5	1801.62	2956.52	4186.99	1256.6	0.0599223	0.0169967
12	18KH1c_165	154.4	10.1	0.0654145	0.359746	11.5999	0.0339	10.8657	0.936704	29.4985	10.8657	0.077	4.06139	214.9	10.8657	1120.3	4.06139	0.191824		18KH1c_165	-0.337553	0.261011	-21.5517	0.131291	5.60811	1.61634	20.603	102.77	156.504	300.366	593.75	1125.51	1975.16	2808.94	1349.3	0.150369	0.0104311
12	18KH1c_166	1669	541	0.324146	2.14042	5.75161	0.1681	5.50093	0.956417	5.94884	5.50093	0.09239	1.6795	1001.6	5.50093	1474.6	1.6795	0.679235		18KH1c_166	0.0216456	21.2072	-8.62069	0.722101	25	3.19716	104.02	285.319	475.61	868.132	1700	2506.07	3484.47	4101.63	1308.1	0.0626954	0.0298525
12	18KH1c_167	575	874	1.52	0.0463482	15.9909	0.0038	14.6553	0.916474	263.158	14.6553	0.0885	6.39787	24.45	14.6553	1392.5	6.39787	0.0175583		18KH1c_167	-50.6329	91.354	-614.224	15.0985	75.6757	44.2274	180.402	257.618	443.089	897.436	1406.25	2271.26	3298.14	4386.18	895.07	0.378523	0.0546982
12	18KH1c_17	134	61.2	0.456716	1.2166	10.3212	0.0969	9.76894	0.946495	10.3199	9.76894	0.0911	3.33082	596.2	9.76894	1447.8	3.33082	0.411797		18KH1c_17	-1.77215	27.4062	0.302802	0.547046	11.7568	5.3286	69.8492	142.936	272.358	483.516	862.5	1384.62	2173.91	2910.57	1287.5	0.185947	0.0321307
12	18KH1c_172	166.9	140.6	0.842421	0.0656193	17.2476	0.00538	14.6794	0.851101	185.874	14.6794	0.0885	9.05504	34.59	14.6794	1392.5	9.05504	0.0248402		18KH1c_172	-151.899	60.522	-1831.9	30.8534	49.3243	12.7886	135.176	315.789	577.236	1137.36	2043.75	2728.74	4105.59	4674.8	948.63	0.156619	0.0329248
12	18KH1c_173	537	212.6	0.395903	2.54218	6.75721	0.179	6.56156	0.971047	5.58659	6.56156	0.10305	1.61422	1061.5	6.56156	1678.9	1.61422	0.632259		18KH1c_173	-1.77215	35.3997	-61.4224	4.50766	29.7297	17.762	219.598	468.144	914.634	1604.4	2381.25	2979.76	4577.64	4918.7	968.2	0.219827	0.0479719
12	18KH1c_174	961	220.3	0.22924	3.13951	6.6737	0.232	6.45794	0.96767	4.31034	6.45794	0.09819	1.68323	1345	6.45794	1589.2	1.68323	0.846338		18KH1c_174	0.0224895	23.6542	-23.7069	1.07221	29.0541	19.1829	184.925	379.501	686.992	1219.78	2025	2651.82	3701.86	4552.85	1209.22	0.261707	0.0499545
12	18KH1c_179	517	194	0.375242	1.18044	13.7044	0.098	13.4632	0.982402	10.2041	13.4632	0.0874	2.55967	602.7	13.4632	1368.5	2.55967	0.440409		18KH1c_179	-0.843882	15.8238	-130.388	3.1291	18.2432	2.6643	58.794	82.8255	143.089	245.421	600	902.834	1627.33	2235.77	1328.7	0.0813515	0.0361291
12	18KH1c_182	653	482	0.738132	1.35616	6.27964	0.0967	6.03939	0.96174	10.3413	6.03939	0.10176	1.72039	595	6.03939	1655.6	1.72039	0.359386		18KH1c_182	0.0219409	46.6558	-344.828	10.5033	121.622	37.3002	422.111	695.291	1219.51	1941.39	3056.25	3615.38	5217.39	5528.46	1020.73	0.164624	0.0809045
12	18KH1c_183	960	173	0.180208	1.00452	9.59935	0.0833	9.40909	0.98018	12.0048	9.40909	0.0875	1.90172	515.8	9.40909	1370.7	1.90172	0.376304		18KH1c_183	0.0229536	5.0571	-67.8879	1.07221	12.8378	2.30906	73.8693	168.975	361.789	633.7	1168.75	1821.86	3161.49	4146.34	1362.69	0.074982	0.0233654
12	18KH1c_187	545	476	0.873394	1.69929	4.4561	0.1302	4.02458	0.903161	7.68049	4.02458	0.0947	1.91302	789	4.02458	1521.3	1.91302	0.518635		18KH1c_187	0.0230802	80.9135	-122.845	3.76368	53.3784	22.7353	197.487	418.283	662.602	1034.8	1631.25	2182.19	3347.83	3760.16	1180.38	0.221436	0.0589898
12	18KH1c_188	1216	759	0.624178	1.15243	7.64592	0.0925	7.39386	0.967032	10.8108	7.39386	0.0904	1.94706	570.3	7.39386	1433.1	1.94706	0.397949		18KH1c_188	-0.295359	23.6542	-44.181	1.26915	33.1081	2.84192	179.899	376.731	776.423	1320.51	2268.75	3376.52	4813.66	5609.76	1524.4	0.0368239	0.0373727
12	18KH1c_189	1255	833	0.663745	0.00750316	13.1229	0.000915	10.8477	0.826623	1092.9	10.8477	0.0595	7.38501	5.9	10.8477	584.5	7.38501	0.0100941		18KH1c_189	-3.29114	14.6493	-115.302	6.56455	21.6892	7.81528	100.503	304.709	581.301	1157.51	2143.75	2781.38	4403.73	4849.59	1403.89	0.167392	0.0228222
12	18KH1c_190	496	82.8	0.166935	3.51361	5.25565	0.272	4.97531	0.946659	3.67647	4.9753	0.09373	1.69356	1550.9	4.9753	1501.8	1.69356	1.03269		18KH1c_190	-0.464135	11.5824	-31.25	1.79431	13.9189	3.5524	93.4673	214.404	351.22	569.597	887.5	1028.34	1577.64	1886.18	1287.5	0.0984893	0.059245
12	18KH1c_192	98.6	89	0.902637	1.60635	13.2946	0.132	13.0826	0.984049	7.57576	13.0826	0.0883	2.36511	799.3	13.0826	1388.2	2.36511	0.575782		18KH1c_192	-0.379747	15.3997	-112.069	5.68928	43.2432	21.8472	255.276	459.834	817.073	1358.97	2243.75	2797.57	4204.97	4959.35	1124.76	0.207937	0.0607083
12	18KH1c_193	389	299.3	0.769409	3.03789	3.35093	0.2187	2.96725	0.885499	4.57247	2.96725	0.10079	1.55698	1275	2.96725	1637.9	1.55698	0.778436		18KH1c_193	-0.759494	8.31974	-207.974	12.4726	79.7297	7.9929	314.573	490.305	800.813	1382.78	2056.25	2384.62	3316.77	3369.92	874.47	0.05047	0.0948431
12	18KH1c_194	175.8	17.9	0.10182	0.464033	13.6351	0.037	11.582	0.849426	27.027	11.582	0.091	7.19535	234.2	11.582	1445.7	7.19535	0.161998		18KH1c_194	0.0226582	2.87113	-42.0259	0.525164	14.3243	1.95382	53.2663	138.504	251.22	485.348	940.625	1303.64	2583.85	3065.04	1383.29	0.0707328	0.0206151
12	18KH1c_195	122.8	84.4	0.687296	3.22058	3.7204	0.2449	3.24326	0.871752	4.0833	3.24326	0.09542	1.8228	1412.1	3.24326	1535.5	1.8228	0.919635		18KH1c_195	-2.95359	30.9951	-130.388	4.55142	41.8919	5.50622	205.528	376.731	593.496	939.56	1606.25	1991.9	2509.32	2642.28	644.78	0.0593408	0.0819058
12	18KH1c_196	242.1	227.9	0.941347	0.291287	10.0776	0.0228	9.49336	0.942027	43.8597	9.49336	0.0927	3.38139	145.33	9.49336	1480.9	3.38139	0.0981363		18KH1c_196	-2.1519	64.7635	-113.147	2.01313	20.2703	9.23623	69.8492	142.382	250.813	454.212	843.75	1125.51	1906.83	2520.33	1087.68	0.245462	0.036631
12	18KH1c_197	278	9.5	0.0341727	2.31507	10.3392	0.185	9.47266	0.916186	5.40541	9.47266	0.0908	4.14349	1094.2	9.47266	1441.6	4.14349	0.759018		18KH1c_197	0.0218987	0.358891	0.325431	1.50985	5	5.68384	30.6533	86.7036	202.846	258.242	512.5	716.599	1496.89	2024.39	1337.97	0.459112	0.0204779
12	18KH1c_198	850	212	0.249412	1.44138	5.90774	0.1198	5.51122	0.932881	8.34724	5.51122	0.0873	2.12788	729.4	5.51122	1366.3	2.12788	0.533851		18KH1c_198	-1.01266	9.1354	-150.862	6.56455	37.1622	8.34813	138.693	263.158	465.854	706.96	1231.25	1497.98	2478.26	3008.13	1205.1	0.116282	0.055964
12	18KH1c_199	314.2	34.3	0.109166	3.13745	8.50511	0.183	7.98853	0.939263	5.46448	7.98853	0.1244	2.91895	1083.3	7.98853	2019.5	2.91895	0.53642		18KH1c_199	-0.759494	4.84502	-88.3621	1.48796	10.8108	2.48668	37.6884	79.5014	95.5285	135.531	228.125	291.498	689.441	947.154	1163.9	0.123193	0.0546652
12	18KH1c_20	171.1	84.5	0.493863	0.23547	12.8312	0.0216	11.8004	0.919667	46.2963	11.8004	0.0791	5.03877	137.76	11.8004	1173.7	5.03877	0.117372		18KH1c_20	-0.632911	4.73083	-22.6293	2.07877	33.7838	3.73002	220.603	451.524	686.992	1194.14	1893.75	2331.98	3304.35	3878.05	1198.92	0.0432067	0.0667614
12	18KH1c_205	132	98.7	0.747727	0.0607685	13.1681	0.01009	8.06533	0.612491	99.108	8.06533	0.0437	10.4091	64.72	8.06533	0.0001	10.4091	647200		18KH1c_205	0.0223629	33.1158	-177.802	7.48359	27.7027	11.0124	88.9447	183.657	360.163	573.26	1037.5	1396.76	2192.55	2743.9	991.89	0.221851	0.0405669
12	18KH1c_208	90	83.9	0.932222	2.58376	9.84936	0.204	9.59351	0.974023	4.90196	9.59351	0.0919	2.23036	1196.8	9.59351	1464.5	2.23036	0.817207		18KH1c_208	0.0218987	29.3638	-140.086	6.58643	34.4595	28.5968	159.296	307.479	556.911	829.67	1468.75	1797.57	2906.83	3048.78	895.07	0.385976	0.0548007
12	18KH1c_210	656	181	0.275915	0.722718	6.70231	0.0575	6.34461	0.94663	17.3913	6.34461	0.0912	2.1603	360.4	6.34461	1449.9	2.1603	0.248569		18KH1c_210	0.0234599	24.4698	0.34375	1.37856	16.4865	1.38544	65.8291	216.066	422.764	653.846	1262.5	1574.9	2621.12	3211.38	1405.95	0.0420546	0.0251149
12	18KH1c_214	958	104.6	0.109186	0.863088	13.1086	0.0662	12.8956	0.983749	15.1057	12.8956	0.0946	2.35367	413.2	12.8956	1519.3	2.35367	0.271967		18KH1c_214	-0.421941	3.31158	-17.2414	1.4442	6.55405	3.01954	34.6734	82.8255	141.463	250.916	587.5	919.028	1894.41	2528.46	1318.4	0.200303	0.018303
12	18KH1c_218	144.1	63.3	0.439278	0.698588	13.9742	0.0636	13.4063	0.959359	15.7233	13.4063	0.0797	3.94337	397.5	13.4063	1188.7	3.94337	0.334399		18KH1c_218	-3.92405	2.75693	-161.638	4.15755	25.6757	0.479574	61.3065	47.6454	34.5528	15.7509	16.0625	13.7652	18.6335	15.4472	1081.5	0.0120876	3.29012
12	18KH1c_225	2678	29.7	0.0110904	1.44258	10.206	0.123	10.0235	0.982122	8.13008	10.0235	0.0851	1.92126	747.8	10.0235	1316.9	1.92126	0.567849		18KH1c_225	0.021308	0.603589	-57.1121	0.853392	11.8243	0.728242	171.357	656.51	1361.79	1728.94	2618.75	2534.41	3683.23	3373.98	1565.6	0.0161784	0.0465235
12	18KH1c_226	2130	29.6	0.0138967	2.71537	4.29225	0.2291	4.00087	0.932116	4.36491	4.00087	0.086	1.55448	1329.8	4.00087	1337.3	1.55448	0.994392		18KH1c_226	-1.26582	0.45677	0.337284	1.18162	19.5946	2.6643	244.724	842.105	1589.43	2142.86	2806.25	2595.14	3316.77	3109.76	1483.2	0.0384748	0.0737837
12	18KH1c_229	506	151.6	0.299605	1.45387	13.0765	0.118	12.9183	0.987903	8.47458	12.9183	0.0894	2.02784	719	12.9183	1411.9	2.02784	0.509243		18KH1c_229	-0.548523	30.9951	-68.9655	3.58862	35.8108	26.2877	151.759	326.87	532.52	811.355	1443.75	1728.74	2863.35	3638.21	1042.36	0.35659	0.0530004
12	18KH1c_232	179.7	121.6	0.676683	2.21966	5.59829	0.169	5.26291	0.940091	5.91716	5.26291	0.0953	1.90858	1006.6	5.26291	1533.2	1.90858	0.656535		18KH1c_232	0.0216878	18.0098	-60.3448	8.75274	56.7568	40.1421	253.266	506.925	959.35	1465.2	2712.5	3113.36	4521.74	4951.22	922.88	0.334813	0.0560108
12	18KH1c_233	615	17	0.0276423	2.36804	12.892	0.191	12.7742	0.990861	5.2356	12.7742	0.08996	1.739	1126.8	12.7742	1423.8	1.739	0.791403		18KH1c_233	-1.56118	0.750408	0.322198	1.07221	4.72973	0.834813	19.598	96.3989	245.528	527.473	1218.75	1862.35	3590.06	4593.5	1349.3	0.0867093	0.00545896
12	18KH1c_236	1700	13.4	0.00788235	1.94085	13.3499	0.161	13.2447	0.992123	6.21118	13.2447	0.08747	1.67235	962.3	13.2447	1370	1.67235	0.702409		18KH1c_236	-0.295359	0.668842	-47.4138	0.765864	6.55405	4.97336	43.7186	120.222	182.927	271.062	480.625	720.648	1484.47	1898.37	1400.8	0.293807	0.0294506
12	18KH1c_24	519	163.2	0.314451	3.9473	5.39924	0.284	5.12281	0.948802	3.52113	5.12281	0.10085	1.70546	1611.5	5.12281	1639	1.70546	0.983221		18KH1c_24	0.0218565	18.1077	-103.448	5.0547	39.1892	17.0515	231.658	479.224	796.748	1472.53	2243.75	3072.87	3993.79	4674.8	1100.04	0.17896	0.0580046
12	18KH1c_241	220.7	95	0.430449	2.26746	6.09864	0.1771	5.6812	0.931551	5.64653	5.6812	0.0929	2.21753	1051.1	5.6812	1485	2.21753	0.707811		18KH1c_241	-0.675105	24.3067	-86.2069	1.33479	15.9459	9.94671	66.3317	152.355	327.236	558.608	1037.5	1388.66	2192.55	2670.73	1035.15	0.30584	0.0302532
12	18KH1c_242	431.3	121.9	0.282634	1.78972	10.3868	0.141	10.192	0.981249	7.0922	10.192	0.0921	2.00201	850.3	10.192	1468.6	2.00201	0.578987		18KH1c_242	-1.09705	34.4209	-129.31	4.37637	29.0541	18.4725	102.513	254.848	483.74	774.725	1412.5	1882.59	3248.45	3597.56	1143.3	0.33848	0.0315574
12	18KH1c_248	898	32.8	0.0365256	0.429741	11.6924	0.0358	11.4075	0.975633	27.933	11.4075	0.0871	2.56538	226.7	11.4075	1361.8	2.56538	0.166471		18KH1c_248	-0.92827	0.897227	0.313578	1.13786	4.39189	-0.0806394	27.6382	143.49	321.138	505.495	950	1534.41	2664.6	3008.13	1245.27	-0.00731925	0.0103724
12	18KH1c_252	2429	730.5	0.300741	2.2167	6.34882	0.1225	6.08414	0.958311	8.16327	6.08414	0.1313	1.81403	744.9	6.08414	2114.6	1.81403	0.352265		18KH1c_252	-0.021097	11.093	4.31034	37.1991	364.865	115.453	1537.69	1731.3	1044.72	642.857	421.25	388.664	472.05	544.715	1256.6	0.154136	3.25747
12	18KH1c_258	402	105.4	0.262189	0.0415306	17.1943	0.00516	12.2337	0.711495	193.798	12.2337	0.0584	12.0823	33.18	12.2337	544	12.0823	0.0609926		18KH1c_258	0.00843882	1.94127	0.614224	9.84683	9.7973	0.337478	33.6683	79.5014	154.472	289.377	562.5	914.98	1900.62	2227.64	1359.6	0.0185815	0.0177144
12	18KH1c_259	532	615	1.15602	0.93907	9.5697	0.0696	9.33936	0.975931	14.3678	9.33936	0.0979	2.08696	433.7	9.33936	1583.7	2.08696	0.273852		18KH1c_259	-2.02532	44.5351	11.0991	34.7921	41.8919	9.23623	164.824	398.892	556.911	1104.4	1756.25	2024.29	2944.1	3804.88	1174.2	0.111153	0.0559846
12	18KH1c_26	451	104.3	0.231264	0.139317	13.6349	0.0108	13.1654	0.965565	92.5926	13.1654	0.0936	3.54729	69.25	13.1654	1499.2	3.54729	0.0461913		18KH1c_26	0.0212236	12.0392	-22.6293	1.15974	14.1892	3.19716	51.7588	93.9058	174.39	344.322	581.25	951.417	1496.89	1691.06	1274.11	0.117976	0.0345775
12	18KH1c_263	240.1	394	1.64098	2.00884	14.8722	0.16	14.5578	0.978864	6.25	14.5578	0.0911	3.04152	956.8	14.5578	1447.8	3.04152	0.660865		18KH1c_263	0.0113924	8.18923	2.26293	15.0985	38.5135	1.95382	71.3568	105.54	148.78	234.432	353.125	477.733	788.82	987.805	1311.19	0.0372701	0.0904602
12	18KH1c_271	396.5	59.8	0.15082	2.3274	5.68196	0.193	5.19957	0.915101	5.18135	5.19957	0.0875	2.29111	1137.6	5.19957	1370.7	2.29111	0.829941		18KH1c_271	0	0.8646	-0.0969828	1.57549	27.7027	0.781528	53.7688	135.457	196.341	280.22	489.375	623.482	968.944	1272.36	1301.92	0.0202497	0.0554922
12	18KH1c_272	530	73.6	0.138868	2.83669	14.6271	0.223	14.5329	0.993559	4.4843	14.5329	0.0923	1.65746	1297.7	14.5329	1472.7	1.65746	0.881171		18KH1c_272	-0.0421941	40.2936	1.10991	5.25164	16.8919	10.6572	101.508	188.366	382.114	558.608	843.75	1230.77	1782.61	2223.58	1196.86	0.257368	0.0569433
12	18KH1c_273	532	42.7	0.0802632	0.00863179	10.7729	0.001162	5.26245	0.488488	860.585	5.26245	0.0539	9.40014	7.49	5.26245	366	9.40014	0.0204645		18KH1c_273	0	6.0522	1.72414	6.78337	21.6216	1.7762	49.7487	126.039	264.228	467.033	906.25	1603.24	2981.37	4182.93	1575.9	0.0541572	0.0166866
12	18KH1c_274	314	82.2	0.261783	3.4778	8.81022	0.277	8.26856	0.93852	3.61011	8.26856	0.0911	3.04152	1576.2	8.26856	1447.8	3.04152	1.08869		18KH1c_274	-0.0168776	9.08646	0.797414	0.700219	20.9459	3.73002	95.4774	231.856	500	943.223	1556.25	2178.14	3341.61	4548.78	1251.45	0.0834086	0.0285722
12	18KH1c_276	411	174	0.423358	1.93361	4.75002	0.1507	4.37019	0.920036	6.6357	4.37019	0.0931	1.86121	904.9	4.37019	1489.1	1.86121	0.607682		18KH1c_276	-0.0232068	47.7977	1.18534	8.09628	29.7297	14.2096	139.698	279.778	516.26	774.725	1437.5	1866.4	3012.42	4065.04	1182.44	0.220491	0.0463741
12	18KH1c_278	159.8	343	2.14643	1.55152	5.81631	0.1225	5.4851	0.943056	8.16327	5.4851	0.0919	1.93471	744.9	5.4851	1464.5	1.93471	0.508638		18KH1c_278	-0.0590717	104.078	2.69397	15.3173	83.1081	75.8437	376.382	717.452	1247.97	1758.24	3137.5	3765.18	5546.58	6382.11	955.84	0.428828	0.0678583
12	18KH1c_279	491	221.5	0.45112	3.60401	4.59988	0.2638	4.24113	0.922008	3.79075	4.24112	0.09913	1.78093	1509.3	4.24112	1607	1.78093	0.939203		18KH1c_279	0.00632911	20.2284	0.926724	3.28228	14.6622	-0.479574	88.4422	202.216	331.707	664.835	1075	1384.62	2167.7	2479.67	1236	-0.0133176	0.0408
12	18KH1c_280	225.9	286.6	1.2687	3.13613	5.90259	0.258	5.53887	0.93838	3.87597	5.53887	0.0882	2.03997	1479.6	5.53887	1386	2.03997	1.06753		18KH1c_280	-0.014346	58.7276	-0.0215517	2.80088	18.9189	10.1243	75.3769	158.726	241.057	397.436	806.25	983.806	1838.51	2353.66	1128.88	0.268101	0.0409989
12	18KH1c_282	275.3	241.4	0.876862	0.465731	11.9844	0.0378	11.6058	0.968416	26.455	11.6058	0.0894	2.98818	239.2	11.6058	1411.9	2.98818	0.169417		18KH1c_282	0.0270464	2.18597	1.61638	17.0678	84.4595	-0.497336	127.136	114.958	119.106	84.0659	80.625	60.7287	62.1118	56.5041	1256.6	-0.00479945	2.04688
12	18KH1c_284	113	89.2	0.789381	3.35002	9.90614	0.268	9.60772	0.969875	3.73134	9.60772	0.0907	2.41318	1530.6	9.60772	1439.5	2.41318	1.06329		18KH1c_284	0.0278059	37.5204	0.140086	7.00219	33.7838	14.2096	106.03	211.911	408.13	639.194	1231.25	1688.26	2701.86	3589.43	1087.68	0.237418	0.0392433
12	18KH1c_286	2166	20.4	0.00941828	2.22196	3.86258	0.1871	3.44553	0.892027	5.34474	3.44553	0.08617	1.74582	1105.6	3.44553	1341.1	1.74582	0.824398		18KH1c_286	0.0267511	0.619902	0	0	27.027	3.19716	217.085	515.235	609.756	468.864	433.75	368.421	316.77	333.333	1586.2	0.0417397	0.685309
12	18KH1c_287	403.5	12.6	0.0312268	2.50657	7.32125	0.208	7.11289	0.971541	4.80769	7.11289	0.08744	1.73418	1218.2	7.11289	1369.3	1.73418	0.889652		18KH1c_287	-0.0443038	0.440457	0.517241	0.962801	0.540541	2.48668	33.6683	103.878	243.902	459.707	945.625	1842.11	3298.14	4463.41	1369.9	0.582901	0.0102083
12	18KH1c_29	478	160.6	0.335983	1.7494	10.9112	0.133	10.7747	0.987485	7.5188	10.7747	0.09544	1.72085	805	10.7747	1535.9	1.72085	0.524123		18KH1c_29	-0.548523	37.8467	-16.1638	0.853392	23.6486	19.1829	175.879	415.512	853.659	1153.85	1981.25	3036.44	4099.38	4918.7	1452.3	0.297444	0.0429039
12	18KH1c_291	292	36.7	0.125685	2.27656	13.6203	0.189	13.426	0.985732	5.29101	13.426	0.0874	2.29258	1116	13.426	1368.5	2.29258	0.815491		18KH1c_291	0.0444304	1.43556	-0.200431	0.262582	13.6486	1.22558	78.8945	114.958	139.837	139.194	253.75	315.789	409.938	589.431	1323.55	0.0373484	0.192455
12	18KH1c_292	248.9	94.5	0.379671	2.42316	9.81416	0.193	9.60584	0.978774	5.18135	9.60584	0.0911	2.01134	1137.6	9.60584	1447.8	2.01134	0.785744		18KH1c_292	-0.0122363	1.45188	1.72414	13.1291	52.7027	0.284192	102.01	87.8116	87.3984	76.5568	100.625	105.668	119.876	102.846	1371.96	0.00387591	0.850965
12	18KH1c_294	919	934	1.01632	1.42824	5.47747	0.1106	5.15299	0.940761	9.04159	5.15299	0.0937	1.85725	676.2	5.15299	1501.2	1.85725	0.45044		18KH1c_294	0.0225316	33.4421	0.980603	14.0044	36.4865	7.1048	137.186	243.49	504.065	716.117	1237.5	1514.17	1844.72	2426.83	1149.48	0.100422	0.0743668
12	18KH1c_296	251.2	77.3	0.307723	3.2594	6.74454	0.25	6.42573	0.95273	4	6.42573	0.0946	2.04911	1438.5	6.42573	1519.3	2.04911	0.946818		18KH1c_296	0	5.25285	0.107759	3.52298	7.90541	3.19716	52.7638	101.662	247.154	388.278	900	1246.96	2031.06	2686.99	1170.08	0.156543	0.0259785
12	18KH1c_299	1236	463	0.374595	1.5066	7.5768	0.1091	7.24898	0.956734	9.1659	7.24898	0.1002	2.20458	667.5	7.24898	1627	2.20458	0.410264		18KH1c_299	-0.0506329	23.1648	0.969828	14.442	60.1351	27.5311	231.658	387.812	845.528	1195.97	2262.5	3072.87	4677.02	6463.41	1009.4	0.233257	0.0495312
12	18KH1c_3	745.6	273	0.366148	2.24862	6.81795	0.167	6.41455	0.940832	5.98802	6.41455	0.0977	2.31043	995.6	6.41455	1579.8	2.31043	0.630206		18KH1c_3	-7.173	27.8956	-129.31	3.17287	21.6216	19.3606	75.3769	160.665	273.171	481.685	737.5	1076.92	1987.58	2686.99	1053.69	0.479573	0.037924
12	18KH1c_30	978	251.5	0.257157	1.01898	12.9819	0.0756	12.7749	0.984054	13.2275	12.7749	0.0978	2.30909	469.8	12.7749	1581.8	2.30909	0.297003		18KH1c_30	-0.590717	12.5612	-29.0948	1.11597	16.2838	10.1243	84.4221	148.476	211.789	311.355	440.625	578.947	850.932	959.35	1462.6	0.273062	0.0992114
12	18KH1c_303	274	18.7	0.0682482	1.90556	5.03222	0.1573	4.5635	0.906856	6.35728	4.5635	0.0879	2.12078	941.8	4.5635	1379.4	2.12078	0.682761		18KH1c_303	0.0092827	11.5824	0	0.765864	5.2027	3.37478	28.1407	113.85	204.472	351.648	768.75	1259.11	2093.17	2906.5	1400.8	0.278909	0.0134441
12	18KH1c_305	167.6	23.8	0.142005	3.46076	5.85031	0.203	5.43659	0.929282	4.92611	5.43659	0.1237	2.16093	1191.4	5.43659	2009.5	2.16093	0.592884		18KH1c_305	-2.23629	21.6966	7.11207	17.2867	22.2973	8.34813	28.6432	34.903	55.6911	91.2088	159.375	311.741	472.671	609.756	1091.8	0.330333	0.0605987
12	18KH1c_306	216.1	240.4	1.11245	1.84671	6.66827	0.1624	6.40044	0.959835	6.15763	6.40044	0.08251	1.87088	970.1	6.40044	1256.8	1.87088	0.771881		18KH1c_306	-0.886076	15.8238	8.83621	40.919	54.7297	2.02487	38.6935	40.4432	54.065	44.8718	60	66.8016	65.2174	68.6992	1452.3	0.0440013	0.5933
12	18KH1c_307	678	30.9	0.0455752	1.44086	12.2976	0.118	12.0853	0.982736	8.47458	12.0853	0.0886	2.27523	719	12.0853	1394.7	2.27523	0.515523		18KH1c_307	-0.0253165	1.1093	-0.167026	3.93873	41.8919	1.19005	176.884	191.136	174.797	104.396	81.25	57.085	45.3416	53.252	1309.13	0.0138247	3.90115
12	18KH1c_310	318.8	262.1	0.822146	0.0300531	14.8396	0.00354	12.9183	0.870529	282.486	12.9183	0.0616	7.30279	22.78	12.9183	659.3	7.30279	0.0345518		18KH1c_310	-1.89873	37.5204	19.2888	78.7746	69.5946	4.08526	64.8241	45.1524	49.187	30.9524	40.625	25.5061	38.5093	27.6423	1205.1	0.0608224	1.68334
12	18KH1c_322	103.5	69	0.666667	2.79685	9.3289	0.227	9.10583	0.976089	4.40529	9.10583	0.0894	2.02784	1318.8	9.10583	1411.9	2.02784	0.93406		18KH1c_322	0.00603376	25.6117	0.161638	3.50109	21.6216	1.42096	67.8392	199.446	398.374	644.689	1037.5	1842.11	2012.42	2613.82	960.99	0.037102	0.0337102
12	18KH1c_325	427.3	220.8	0.516733	0.70723	8.62114	0.0559	7.34608	0.852102	17.8891	7.34608	0.0918	4.5121	350.6	7.34608	1462.4	4.5121	0.239743		18KH1c_325	-0.00590717	39.8042	0.12931	1.2035	16.2162	9.94671	59.799	107.479	200.813	316.85	706.25	1174.09	1503.11	2337.4	1206.13	0.319417	0.0397836
12	18KH1c_327	414	48.7	0.117633	3.39291	3.71558	0.2431	3.25522	0.876102	4.11353	3.25522	0.10127	1.79138	1402.8	3.25522	1646.7	1.79138	0.851886		18KH1c_327	0.00919831	4.9429	-0.217672	4.07002	15.5405	4.79574	74.3719	148.199	221.951	349.817	593.75	967.611	1304.35	1829.27	1052.66	0.141065	0.0570184
12	18KH1c_328	1257	373	0.296738	0.426011	10.7134	0.0323	10.4724	0.977506	30.9597	10.4724	0.0957	2.25956	204.9	10.4724	1541	2.25956	0.132966		18KH1c_328	-0.0177215	22.0228	0.0431034	1.99125	16.8919	1.2611	76.8844	193.075	378.049	653.846	1206.25	2145.75	2372.67	3097.56	1173.17	0.0349938	0.0324042
12	18KH1c_329	428	208.7	0.487617	0.0107622	18.5133	0.00114	12.4942	0.674879	877.193	12.4942	0.0685	13.6615	7.34	12.4942	883	13.6615	0.00831257		18KH1c_329	0	2.07178	1.13147	19.6937	56.7568	1.06572	81.407	74.5152	64.6341	63.37	72.5	93.1174	90.0621	63.8211	1277.2	0.0156784	0.903899
12	18KH1c_331	292.6	140	0.478469	1.3341	8.09665	0.1042	7.7393	0.955864	9.59693	7.7393	0.0929	2.37887	639	7.7393	1485	2.37887	0.430303		18KH1c_331	0.00168776	3.78467	0.528017	11.5974	31.7568	5.15098	39.196	48.7535	84.5528	124.542	259.375	489.879	813.665	1036.59	1321.49	0.145999	0.0481722
12	18KH1c_335	257	143	0.55642	1.44626	11.6832	0.11	11.1489	0.954268	9.09091	11.1489	0.0954	3.49274	672.7	11.1489	1535.1	3.49274	0.438212		18KH1c_335	-0.147679	25.4486	1.50862	15.5361	38.5135	6.03908	106.03	221.607	443.089	661.172	1293.75	2287.45	2496.89	3780.49	1238.06	0.0945038	0.0424648
12	18KH1c_336	246	129.5	0.526423	0.688087	11.4466	0.0568	9.61027	0.839578	17.6056	9.61027	0.0879	6.21822	356.1	9.61027	1379.4	6.21822	0.258156		18KH1c_336	-0.324895	7.50408	1.875	22.1007	39.1892	2.13144	48.2412	75.3463	97.1545	150.183	188.75	194.332	175.776	162.602	1236	0.0490208	0.274446
12	18KH1c_339	370	75.7	0.204595	0.701848	12.7985	0.0547	12.6424	0.987802	18.2815	12.6424	0.0931	1.99293	343.3	12.6424	1489.1	1.99293	0.230542		18KH1c_339	-0.0113924	8.92333	-0.159267	0.568928	3.71622	2.48668	37.1859	54.8476	180.081	349.817	750	1315.79	1801.24	2715.45	1400.8	0.211534	0.0206446
12	18KH1c_34	500	147.1	0.2942	1.41276	4.94834	0.1096	4.62677	0.935015	9.12409	4.62677	0.09353	1.75472	670.4	4.62677	1497.8	1.75472	0.44759		18KH1c_34	0.021097	5.69331	-80.819	3.21663	35.1351	3.90764	78.8945	127.424	161.789	260.073	481.25	668.016	1093.17	1544.72	1369.9	0.0742199	0.0721705
12	18KH1c_343	363.8	125.3	0.34442	2.34406	7.46989	0.188	7.28737	0.975565	5.31915	7.28737	0.09047	1.6412	1110.5	7.28737	1434.6	1.6412	0.774083		18KH1c_343	-0.0139241	7.34095	0	3.8512	31.7568	11.1901	111.558	204.986	414.634	668.498	1018.75	1676.11	2043.48	2670.73	1102.1	0.188003	0.0545921
12	18KH1c_344	207.6	56.3	0.271195	2.57786	9.73239	0.206	9.50575	0.976712	4.85437	9.50575	0.0908	2.08811	1207.5	9.50575	1441.6	2.08811	0.837611		18KH1c_344	-0.0189873	6.39478	1.19612	18.1619	60.1351	27.7087	173.367	282.548	475.61	800.366	1368.75	1967.61	2279.5	2853.66	1000.13	0.271375	0.0760547
12	18KH1c_346	627	255.5	0.407496	0.592138	13.8227	0.0461	13.6443	0.987092	21.692	13.6443	0.0932	2.21375	290.5	13.6443	1491.1	2.21375	0.194823		18KH1c_346	0	23.1648	0	1.48796	20.9459	2.30906	112.06	207.756	483.74	869.963	1475	2327.94	2633.54	2979.67	1130.94	0.0476606	0.0425512
12	18KH1c_348	75.3	77.8	1.0332	0.437323	11.8241	0.0361	11.3165	0.957073	27.7008	11.3165	0.0879	3.42718	228.6	11.3165	1379.4	3.42718	0.165724		18KH1c_348	-0.0105485	64.1109	0.075431	4.15755	33.7838	23.9787	134.171	207.756	414.634	692.308	1193.75	1765.18	2105.59	2662.6	1034.12	0.356158	0.0637213
12	18KH1c_35	440.3	139.1	0.315921	2.69544	7.42381	0.22	7.19567	0.969269	4.54545	7.19567	0.0889	1.82628	1281.9	7.19567	1401.1	1.82628	0.914924		18KH1c_35	-12.6582	19.5759	-172.414	4.74836	17.9054	12.4334	134.673	290.859	483.74	813.187	1287.5	1801.62	2633.54	3699.19	1266.9	0.253196	0.0511378
12	18KH1c_358	154.5	217.4	1.40712	0.299456	9.59116	0.0228	9.06845	0.945501	43.8597	9.06845	0.0953	3.12308	145.33	9.06845	1533.2	3.12308	0.0947887		18KH1c_358	-0.0118143	60.0326	0.829741	9.19037	62.1622	41.3854	210.05	396.122	906.504	1437.73	2356.25	3408.91	4186.34	4979.67	1041.33	0.362179	0.0501752
12	18KH1c_36	399	63.6	0.159398	0.498657	11.105	0.0407	10.8126	0.973664	24.57	10.8126	0.0889	2.5318	257.2	10.8126	1401.1	2.5318	0.18357		18KH1c_36	-1.35021	12.7243	-33.4052	1.33479	12.7027	11.7229	94.9749	182.825	421.138	754.579	1275	2101.21	2844.72	4044.72	1108.28	0.337507	0.0333864
12	18KH1c_361	388	144	0.371134	0.87768	8.32876	0.0696	7.68007	0.922115	14.3678	7.68007	0.0915	3.22253	433.7	7.68007	1456.2	3.22253	0.29783		18KH1c_361	0.0113924	3.49103	0.0323276	3.80744	18.9189	2.6643	37.1859	62.3269	112.195	119.048	185	180.567	220.497	247.154	1274.11	0.100449	0.168646
12	18KH1c_363	773	42.6	0.05511	2.5745	10.4408	0.209	10.3077	0.987255	4.78469	10.3077	0.08938	1.66164	1223.5	10.3077	1411.5	1.66164	0.866808		18KH1c_363	0.0120675	0.342577	0.215517	2.01313	8.44595	1.13677	52.7638	78.1163	144.715	230.769	465.625	627.53	850.932	1247.97	1375.05	0.0538492	0.0620071
12	18KH1c_365	1528	48.3	0.0316099	0.932359	6.84771	0.0758	6.61336	0.965778	13.1926	6.61336	0.08925	1.7761	471	6.61336	1408.7	1.7761	0.334351		18KH1c_365	-0.0223629	1.01142	0	0.262582	4.52703	2.48668	16.0804	42.3823	93.9024	302.198	1025	2461.54	4739.13	8089.43	1792.2	0.29145	0.00339311
12	18KH1c_366	520	54.2	0.104231	3.26692	5.73771	0.264	5.4349	0.947225	3.78788	5.4349	0.08979	1.83934	1510.3	5.4349	1420.2	1.83934	1.06344		18KH1c_366	-0.0675105	4.68189	1.50862	6.12691	31.0811	5.15098	108.04	238.227	369.106	479.853	793.75	919.028	1217.39	1495.93	1330.76	0.0888892	0.0887473
12	18KH1c_367	212.6	353.3	1.66181	1.71145	9.47715	0.133	9.3111	0.982479	7.5188	9.3111	0.09337	1.76629	805	9.3111	1494.6	1.76629	0.538606		18KH1c_367	-0.00506329	117.129	0.80819	14.6608	98.6486	23.6234	309.045	614.958	1288.62	2148.35	3487.5	4291.5	5080.75	5528.46	1009.4	0.135297	0.0608267
12	18KH1c_368	472	66.4	0.140678	0.00620851	15.1943	0.000863	4.07211	0.268002	1158.75	4.07211	0.0522	14.6385	5.56	4.07211	293	14.6385	0.0189761		18KH1c_368	-0.00970464	5.1876	2.15517	6.78337	29.7297	1.06572	71.3568	92.2438	153.252	245.421	455	732.794	913.043	1414.63	1318.4	0.0231382	0.0781527
12	18KH1c_37	515.4	326.8	0.634071	0.274396	12.7712	0.022	12.4864	0.977697	45.4545	12.4864	0.0905	2.68221	140.28	12.4864	1435.2	2.68221	0.0977425		18KH1c_37	-1.72996	44.6982	-31.25	3.19475	34.4595	15.6306	113.065	162.05	299.593	542.125	931.25	1477.73	2496.89	3032.52	1145.36	0.250412	0.0452824
12	18KH1c_370	520	61.7	0.118654	1.34014	9.32731	0.104	9.14026	0.979947	9.61538	9.14026	0.0935	1.85857	637.8	9.14026	1497.2	1.85857	0.425995		18KH1c_370	0.00457806	4.95922	0.247845	-0.284464	5.33784	-1.99467	11.608	49.8615	122.764	247.253	712.5	1356.28	2590.06	3520.33	2193.9	-0.253402	0.00448176
12	18KH1c_374	333	337.6	1.01381	2.97812	5.26861	0.2258	4.91189	0.932294	4.4287	4.91189	0.0957	1.90567	1312.4	4.91189	1541	1.90567	0.851655		18KH1c_374	0	55.1387	1.43319	3.71991	18.2432	12.9663	73.3668	145.429	365.854	652.015	1300	1870.45	3006.21	4532.52	1094.89	0.354416	0.0244051
12	18KH1c_376	548.5	283	0.515953	2.33385	4.48912	0.1714	3.76079	0.837758	5.83431	3.76079	0.0988	2.45125	1019.8	3.76079	1600.8	2.45125	0.637056		18KH1c_376	-0.0105485	26.4274	0.193966	3.93873	30.4054	1.98934	112.06	252.078	491.87	822.344	1500	2068.83	2881.99	3654.47	1219.52	0.0340807	0.038883
12	18KH1c_377	200.7	141.2	0.703538	2.36281	5.13824	0.182	4.76734	0.927816	5.49451	4.76734	0.0942	1.91677	1077.9	4.76734	1511.3	1.91677	0.713227		18KH1c_377	0	16.9657	0.560345	5.25164	30.4054	7.1048	111.558	199.446	430.894	699.634	1243.75	1562.75	2211.18	2780.49	945.54	0.121991	0.0504517
12	18KH1c_378	392.9	65.8	0.167473	2.44707	6.66762	0.202	6.37029	0.955408	4.9505	6.37029	0.0879	1.96887	1186.1	6.37029	1379.4	1.96887	0.859867		18KH1c_378	0	14.1925	0.18319	5.03282	18.9189	9.41385	59.2965	146.26	277.642	434.066	738.75	1052.63	1571.43	2231.71	1223.64	0.281064	0.0377341
12	18KH1c_379	1582	496	0.313527	1.50628	8.10621	0.1184	7.9417	0.979706	8.44595	7.9417	0.09231	1.62482	721.3	7.9417	1472.9	1.62482	0.489714		18KH1c_379	-0.181435	151.06	19.3966	95.186	208.108	13.6767	180.905	274.238	414.634	487.179	871.875	1085.02	1745.34	2146.34	1307.07	0.0704877	0.10365
12	18KH1c_382	757	48.8	0.064465	2.39707	5.67648	0.1805	5.39064	0.949644	5.54017	5.39064	0.09636	1.77862	1069.7	5.39064	1554	1.77862	0.688353		18KH1c_382	0.00936709	2.18597	-0.435345	1.57549	15.1351	0.71048	43.7186	131.856	260.976	340.659	696.875	1194.33	2236.02	3317.07	1410.07	0.0276201	0.0195519
12	18KH1c_383	97.2	91.4	0.940329	1.76476	9.10598	0.13	8.76856	0.962945	7.69231	8.76856	0.0985	2.45585	787.9	8.76856	1595.1	2.45585	0.49395		18KH1c_383	0	79.4454	0	11.5974	45.9459	25.3996	159.799	321.33	500	946.886	1537.5	2020.24	2788.82	4024.39	904.34	0.296426	0.0572999
12	18KH1c_384	138	72.1	0.522464	0.629649	11.9019	0.0485	11.5711	0.972206	20.6186	11.5711	0.0942	2.78653	305.3	11.5711	1511.3	2.78653	0.202012		18KH1c_384	-0.0189873	12.3328	2.80172	6.56455	42.5676	9.05861	123.618	260.388	479.675	804.029	1418.75	1736.84	2552.8	3495.93	919.79	0.124877	0.0484246
12	18KH1c_385	553	72.5	0.131103	2.14086	9.93637	0.18	9.72047	0.978272	5.55556	9.72047	0.0863	2.06007	1067	9.72047	1344	2.06007	0.793899		18KH1c_385	-0.00253165	19.4127	0.204741	7.22101	20.2703	4.97336	74.8744	135.18	257.317	335.165	561.25	834.008	1422.36	1760.16	1227.76	0.12766	0.0526409
12	18KH1c_386	313	298.4	0.953355	2.23053	8.16754	0.184	7.94873	0.973209	5.43478	7.94873	0.08796	1.8779	1088.8	7.94873	1380.7	1.8779	0.788586		18KH1c_386	0	2.00653	0.969828	13.3479	41.2162	-0.888099	42.7136	48.7535	47.1545	69.0476	73.125	69.6356	74.5342	66.6667	1350.33	-0.0211663	0.573074
12	18KH1c_389	405	309.9	0.765185	2.28171	7.77905	0.194	7.57415	0.973661	5.15464	7.57415	0.08534	1.77363	1143	7.57415	1322.4	1.77363	0.864338		18KH1c_389	-0.00464135	1.01142	1.93966	13.1291	62.8378	1.52753	60.3015	57.6177	59.3496	45.4212	58.125	51.417	46.5839	64.6341	1253.51	0.0248151	1.29447
12	18KH1c_39	490.7	348.6	0.710414	2.88882	3.83558	0.2053	3.38542	0.882636	4.87092	3.38542	0.1021	1.80294	1203.7	3.38542	1661.8	1.80294	0.724335		18KH1c_39	-1.26582	85.6444	-161.638	13.7856	70.9459	19.3606	319.598	606.648	943.089	1591.58	2468.75	3530.36	4968.94	6138.21	999.1	0.128574	0.0643191
12	18KH1c_390	73.6	41.3	0.561141	2.08152	11.8944	0.157	11.6934	0.983099	6.36943	11.6934	0.0962	2.17754	940.1	11.6934	1550.8	2.17754	0.606203		18KH1c_390	-0.548523	29.0375	26.9397	23.4136	25	8.34813	70.8543	124.1	257.724	450.549	837.5	1036.44	1459.63	1971.54	997.04	0.198352	0.0485427
12	18KH1c_392	558	23.3	0.0417563	3.1697	12.1153	0.259	11.4307	0.943489	3.861	11.4307	0.0888	4.01505	1484.7	11.4307	1399	4.01505	1.06126		18KH1c_392	0.0100422	2.61011	0	-1.07002	10.2703	2.6643	63.3166	191.136	422.764	807.692	1806.25	2591.09	4720.5	5772.36	1462.6	0.10448	0.0134131
12	18KH1c_393	175	114.6	0.654857	3.63813	9.53503	0.277	9.31373	0.976791	3.61011	9.31373	0.0953	2.04235	1576.2	9.31373	1533.2	2.04235	1.02805		18KH1c_393	0.00464135	14.6819	2.80172	8.53392	63.5135	19.7158	161.809	335.18	585.366	998.168	1675	2060.73	3068.32	4174.8	979.53	0.194482	0.0527353
12	18KH1c_395	569	107.1	0.188225	1.80983	7.94777	0.14	7.50403	0.944167	7.14286	7.50403	0.0938	2.61852	844.7	7.50403	1503.2	2.61852	0.561935		18KH1c_395	0	4.46982	0.862069	7.22101	23.6486	0.106572	78.8945	115.512	145.122	210.623	462.5	595.142	1062.11	1463.41	1462.6	0.00246727	0.0742808
12	18KH1c_396	241.1	133.1	0.552053	0.234467	15.1965	0.0217	14.9248	0.982122	46.0829	14.9248	0.0784	2.8607	138.4	14.9248	1156.1	2.8607	0.119713		18KH1c_396	-0.00632911	32.9527	0.387931	13.5667	43.9189	3.19716	121.608	229.917	434.959	611.722	1425	1663.97	2906.83	3760.16	1318.4	0.0437479	0.0418352
12	18KH1c_397	723	412.2	0.570124	1.27994	7.33275	0.0965	7.11761	0.97066	10.3627	7.11761	0.09624	1.76321	593.9	7.11761	1551.6	1.76321	0.382766		18KH1c_397	0	64.6003	0	0.371991	14.1892	4.4405	48.7437	102.216	253.659	441.392	1006.25	1412.96	2838.51	3723.58	1172.14	0.168847	0.0171723
12	18KH1c_399	531	39.7	0.0747646	1.00704	9.71076	0.0837	9.36682	0.964581	11.9474	9.36681	0.0873	2.56157	518.2	9.36681	1366.3	2.56157	0.379272		18KH1c_399	-0.00548523	0.897227	0.215517	4.28884	20.2703	-0.35524	52.7638	62.0499	119.106	128.205	287.5	331.984	639.752	967.48	1318.4	-0.0108623	0.0824755
12	18KH1c_40	1300	1293	0.994615	0.346968	14.3978	0.0299	14.2339	0.988613	33.4448	14.2339	0.0842	2.1666	189.9	14.2339	1296.3	2.1666	0.146494		18KH1c_40	0.0211814	58.2382	-61.4224	2.1663	43.2432	45.2931	171.357	249.307	363.415	631.868	943.75	1380.57	1844.72	2638.21	1025.88	0.526165	0.0928904
12	18KH1c_400	135.6	1.3	0.00958702	0.361654	13.8416	0.0358	13.3284	0.962926	27.933	13.3284	0.0733	3.73402	226.7	13.3284	1021.3	3.73402	0.221972		18KH1c_400	0.0159494	7.09625	7.21983	18.5996	58.7838	2.48668	55.7789	62.0499	48.7805	41.7582	49.375	53.8462	66.4596	64.2276	1296.77	0.0434266	0.83929
12	18KH1c_402	353	73	0.206799	0.760392	5.78722	0.0632	5.2747	0.91144	15.8228	5.2747	0.0873	2.38105	395.1	5.2747	1366.3	2.38105	0.289175		18KH1c_402	0.0104641	1.58238	2.15517	5.47046	47.973	0.746004	84.9246	90.0277	76.8293	58.6081	53.125	60.7287	62.1118	84.5528	1534.7	0.0116876	1.36729
12	18KH1c_405	440	961	2.18409	1.16779	8.8919	0.0891	8.61786	0.969182	11.2233	8.61787	0.0951	2.19049	550.2	8.61787	1529.2	2.19049	0.359796		18KH1c_405	-0.00675105	37.8467	21.6595	22.5383	183.108	26.2877	376.884	601.108	707.317	957.875	1275	1388.66	2105.59	2650.41	1155.66	0.100068	0.178992
12	18KH1c_407	80.1	51.6	0.644195	1.88877	8.67829	0.148	8.42801	0.971161	6.75676	8.42801	0.0926	2.06913	889.7	8.42801	1478.9	2.06913	0.601596		18KH1c_407	-0.0105485	19.9021	1.72414	5.03282	27.027	26.4654	75.3769	152.355	268.699	459.707	862.5	1056.68	1850.93	2593.5	917.73	0.586354	0.0407238
12	18KH1c_408	444.6	17.3	0.0389114	0.00636421	15.3214	0.000813	8.2012	0.535275	1230.01	8.2012	0.0568	12.9417	5.24	8.2012	483	12.9417	0.0108489		18KH1c_408	-0.0232068	5.677	5.71121	3.71991	12.8378	4.79574	43.2161	107.202	220.732	467.033	887.5	1542.51	3142.86	4528.46	1421.4	0.203604	0.0137506
12	18KH1c_409	336	73	0.217262	1.23527	9.77417	0.0997	9.51	0.972972	10.0301	9.51	0.0899	2.25707	612.7	9.51	1422.5	2.25707	0.430721		18KH1c_409	-0.126582	4.42088	12.8233	9.84683	63.5135	1.59858	89.4472	102.77	60.9756	35.8974	24.4375	22.2672	23.6025	19.5122	1545	0.0212089	3.78974
12	18KH1c_41	149.5	69.4	0.464214	3.3352	6.08514	0.242	5.46612	0.898274	4.13223	5.46612	0.1	2.67402	1397.1	5.46612	1623.2	2.67402	0.860707		18KH1c_41	0.0215612	9.52692	-46.3362	1.42232	12.7703	6.39432	98.4925	185.596	313.008	549.451	787.5	1020.24	1440.99	1930.89	1021.76	0.180299	0.0683504
12	18KH1c_414	225.1	115	0.510884	0.0954886	11.6834	0.0101	11.1313	0.952748	99.0099	11.1313	0.0686	3.54898	64.78	11.1313	885.8	3.54898	0.0731316		18KH1c_414	0.0212236	7.12887	12.5	17.0678	65.5405	0.53286	81.407	73.9612	55.2846	50	51.25	51.8219	55.2795	59.7561	1133	0.00729503	1.47264
12	18KH1c_42	90.8	69.3	0.763216	0.548943	9.52691	0.0426	8.53183	0.89555	23.4742	8.53183	0.0935	4.2391	268.9	8.53183	1497.2	4.2391	0.179602		18KH1c_42	-2.23629	27.5693	-19.3966	2.42888	25	19.0053	159.799	263.158	447.154	756.41	1125	1607.29	2074.53	2654.47	856.96	0.30069	0.0770289
12	18KH1c_422	83.8	104	1.24105	1.53845	6.32174	0.1216	5.97065	0.944462	8.22368	5.97065	0.0918	2.07745	739.8	5.97065	1462.4	2.07745	0.505881		18KH1c_422	-0.00379747	56.1175	132.543	9.84683	55.4054	154.529	231.658	440.443	906.504	1721.61	2556.25	3064.78	4782.61	5772.36	786.92	1.36399	0.0484376
12	18KH1c_426	280.5	276	0.983957	2.63102	5.69633	0.1974	5.42552	0.952459	5.06586	5.42552	0.09671	1.73548	1161.3	5.42552	1560.8	1.73548	0.744042		18KH1c_426	0	86.6232	1.18534	7.22101	31.7568	8.17052	101.005	254.848	495.935	888.278	1393.75	1829.96	2850.93	3833.33	1094.89	0.144265	0.0354288
12	18KH1c_43	466	360.5	0.773605	2.76569	5.43237	0.2093	5.17383	0.952407	4.77783	5.17383	0.09588	1.65594	1225.1	5.17383	1544.6	1.65594	0.79315		18KH1c_43	0.0216456	38.1729	0.307112	2.36324	31.0811	3.37478	169.347	406.925	674.797	1362.64	2181.25	3036.44	4633.54	5162.6	1244.24	0.0465167	0.036548
12	18KH1c_430	268.8	108.3	0.402902	2.01	6.08638	0.1502	5.01877	0.82459	6.65779	5.01877	0.0971	3.44326	902.1	5.01877	1568.3	3.44326	0.575209		18KH1c_430	0	30.9951	-7.75862	3.06346	28.3784	7.81528	92.4623	184.765	390.244	653.846	987.5	1336.03	2192.55	2585.37	1074.29	0.15257	0.0421712
12	18KH1c_431	336	361.1	1.0747	0.742404	6.33792	0.0548	5.77018	0.910422	18.2482	5.77018	0.0983	2.62188	343.92	5.77018	1591.3	2.62188	0.216125		18KH1c_431	0	1.7292	-6.14224	10.5033	41.2162	0	45.2261	39.8892	55.2846	52.0147	56.875	64.3725	61.4907	84.9593	1720.1	0	0.735496
12	18KH1c_432	227	61.9	0.272687	0.954314	7.02929	0.0689	6.65126	0.94622	14.5138	6.65125	0.1005	2.27414	429.5	6.65125	1632.5	2.27414	0.263093		18KH1c_432	-0.0388186	5.36705	-3.98707	4.37637	27.7027	23.0906	173.367	484.765	971.545	1500	2406.25	2789.47	4043.48	5284.55	1238.06	0.333189	0.0428757
12	18KH1c_435	222.2	38.8	0.174617	1.03604	9.91076	0.0827	9.00485	0.908593	12.0919	9.00485	0.0909	4.13955	512.2	9.00485	1443.7	4.13955	0.354783		18KH1c_435	-0.0139241	4.14356	-4.74138	4.13567	19.5946	10.8348	91.4573	150.693	303.659	536.63	800	1125.51	1708.07	2231.71	1050.6	0.255944	0.0535441
12	18KH1c_441	221	87.2	0.39457	1.30119	5.83715	0.1269	5.40004	0.925116	7.88022	5.40004	0.0744	2.21627	770.2	5.40004	1051.4	2.21627	0.732547		18KH1c_441	0	7.17781	-6.68103	19.0372	81.0811	2.30906	74.3719	70.6371	87.8049	75.4579	61.875	65.9919	68.9441	54.4715	1359.6	0.0297352	1.07873
12	18KH1c_45	136.3	212	1.55539	3.13178	6.81049	0.23	6.507	0.955438	4.34783	6.507	0.0988	2.0104	1334.5	6.507	1600.8	2.0104	0.833646		18KH1c_45	-122.785	125.449	-1293.1	30.1969	161.486	163.41	527.638	781.163	1089.43	1813.19	2543.75	3210.53	4006.21	5040.65	795.16	0.559813	0.131705
12	18KH1c_452	214.3	10.4	0.0485301	0.806511	12.7544	0.07	12.4992	0.979989	14.2857	12.4992	0.0836	2.5388	436.2	12.4992	1282.4	2.5388	0.340143		18KH1c_452	0	0.50571	0	0	1.89189	2.48668	31.1558	92.5208	278.455	582.418	918.75	1663.97	3142.86	4308.94	1380.2	0.323893	0.0099132
12	18KH1c_453	543	14.2	0.026151	2.30036	10.3187	0.202	10.1646	0.985067	4.9505	10.1646	0.08263	1.77662	1186.1	10.1646	1259.6	1.77662	0.941648		18KH1c_453	0	0.636215	-0.463362	3.50109	24.3243	1.04796	116.08	144.598	114.634	89.7436	59.375	45.749	31.0559	56.5041	1381.23	0.0197217	3.73779
12	18KH1c_454	430.1	83	0.192978	0.693362	14.4953	0.0516	14.333	0.988807	19.3798	14.333	0.0975	2.1627	324.3	14.333	1576	2.1627	0.205774		18KH1c_454	0.0270042	5.53018	-0.775862	9.40919	27.7027	3.19716	90.4523	198.892	439.024	791.209	1206.25	1793.52	2937.89	3524.39	1273.08	0.0638695	0.0307882
12	18KH1c_456	576	26.9	0.0467014	1.02159	8.41314	0.0869	7.93556	0.943234	11.5075	7.93556	0.0853	2.79425	537.2	7.93556	1321.5	2.79425	0.406508		18KH1c_456	-0.00759494	1.38662	0.613147	1.79431	12.2973	-0.568384	78.8945	151.801	195.122	177.656	150.625	129.555	121.118	139.431	1210.25	-0.0182479	0.651385
12	18KH1c_460	706	40	0.0566572	1.50584	8.77813	0.121	8.57854	0.977262	8.26446	8.57854	0.0903	1.86126	736.3	8.57854	1431	1.86126	0.514535		18KH1c_460	-0.021519	6.03589	-1.01293	3.71991	16.0811	4.26288	45.2261	110.526	305.285	549.451	1018.75	2089.07	3453.42	5365.85	1133	0.15807	0.0130961
12	18KH1c_464	80.6	32.1	0.398263	1.44599	9.73953	0.122	9.30512	0.955398	8.19672	9.30512	0.086	2.8763	742.1	9.30512	1337.3	2.8763	0.554924		18KH1c_464	0	15.9869	0	2.23195	10.9459	6.57194	47.7387	118.283	243.902	386.447	700	979.757	1422.36	1861.79	1122.7	0.287496	0.033563
12	18KH1c_466	480	17.4	0.03625	1.67242	8.23844	0.143	8.0288	0.974553	6.99301	8.0288	0.08486	1.84671	861.6	8.0288	1311.5	1.84671	0.656958		18KH1c_466	-0.0092827	0.40783	-0.431034	2.31947	30.4054	1.95382	101.508	177.285	223.984	164.835	136.875	125.506	142.857	154.472	1380.2	0.035169	0.710553
12	18KH1c_467	251	309	1.23108	1.99091	4.90906	0.1747	4.52114	0.920977	5.7241	4.52114	0.08269	1.91265	1038	4.52114	1261	1.91265	0.823156		18KH1c_467	-0.00253165	7.34095	-3.55603	20.1313	45.9459	3.73002	56.2814	53.7396	62.1951	47.0696	34.375	21.8623	37.8882	45.122	1514.1	0.0733508	1.48546
12	18KH1c_472	248.6	147.9	0.594932	3.16703	9.00079	0.178	8.7352	0.970493	5.61798	8.7352	0.1291	2.17034	1056	8.7352	2085	2.17034	0.506475		18KH1c_472	0	12.7243	-0.646552	1.6849	31.0811	8.52575	93.9698	184.488	406.504	710.623	943.75	1331.98	2055.9	2333.33	973.35	0.157758	0.0457074
12	18KH1c_473	958	541	0.564718	1.59097	7.90069	0.1184	7.61897	0.964342	8.44595	7.61896	0.0975	2.09098	721.3	7.61896	1576	2.09098	0.457678		18KH1c_473	-0.0291139	25.6117	-2.04741	15.7549	78.3784	22.3801	230.653	445.983	894.309	1421.25	2081.25	3206.48	4621.12	5894.31	896.1	0.16645	0.0499129
12	18KH1c_475	733	14.6	0.0199181	2.21678	4.51785	0.1774	4.18384	0.926069	5.63698	4.18384	0.09067	1.70483	1052.8	4.18384	1438.8	1.70483	0.731721		18KH1c_475	-0.0185654	0.309951	-3.44828	0.284464	2.22973	0.035524	90.9548	229.917	365.854	360.806	310.625	303.644	344.72	369.919	1349.3	0.0024945	0.263851
12	18KH1c_476	41.8	62.1	1.48565	3.36161	4.6781	0.2653	4.3195	0.923345	3.76932	4.3195	0.09194	1.79625	1516.9	4.3195	1465.3	1.79625	1.03521		18KH1c_476	0	69.168	-32.3276	22.1007	106.081	39.254	230.151	387.812	723.577	1075.09	1331.25	1773.28	2354.04	2898.37	854.9	0.251223	0.0977685
12	18KH1c_477	116.1	125.2	1.07838	2.19558	14.3756	0.178	14.232	0.990011	5.61798	14.232	0.0895	2.02684	1056	14.232	1414	2.02684	0.746818		18KH1c_477	-0.0189873	47.3083	-8.62069	1.53173	20.9459	19.8934	83.4171	147.922	245.935	474.359	712.5	1170.04	2198.76	3495.93	1277.2	0.475918	0.0379383
12	18KH1c_479	611	327	0.535188	2.39823	4.27591	0.2005	3.93433	0.920117	4.98753	3.93434	0.08679	1.67463	1178	3.93434	1355	1.67463	0.869373		18KH1c_479	-0.0156118	2.69168	15.0862	12.6915	40.5405	0	32.1608	50.4155	30.4878	48.7179	33.75	34.413	32.9193	32.5203	1277.2	0	0.97696
12	18KH1c_48	52.2	30.8	0.590038	2.99597	9.02009	0.234	8.43913	0.935592	4.2735	8.43913	0.0929	3.18483	1355.4	8.43913	1485	3.18483	0.912727		18KH1c_48	-1.94093	16.4763	0.310345	0.875274	16.7568	4.97336	135.678	249.307	399.593	747.253	1075	1497.98	2155.28	2987.8	867.26	0.104304	0.0629516
12	18KH1c_480	740	26	0.0351351	0.280928	13.5896	0.0224	13.1491	0.967587	44.6429	13.1491	0.091	3.43189	142.81	13.1491	1445.7	3.43189	0.0987826		18KH1c_480	0	1.95759	14.7629	2.56018	18.8514	2.6643	80.402	182.825	341.463	338.828	363.75	469.636	559.006	593.496	1411.1	0.068435	0.14383
12	18KH1c_481	439	198	0.451025	0.316465	11.6749	0.0275	11.1489	0.954944	36.3636	11.1489	0.0835	3.46496	174.88	11.1489	1280.1	3.46496	0.136614		18KH1c_481	-0.0421941	16.4763	0	1.48796	50.6757	4.97336	123.618	243.767	439.024	727.106	1000	1680.16	2161.49	2764.23	933.18	0.062836	0.0571911
12	18KH1c_482	138.1	53.6	0.388125	1.23705	6.47102	0.096	5.78901	0.894605	10.4167	5.78901	0.0935	2.89162	590.9	5.78901	1497.2	2.89162	0.39467		18KH1c_482	0	1.54976	2.58621	6.56455	64.8649	0.142096	83.9196	80.3324	50.813	37.3626	23.6875	15.3846	38.5093	22.3577	1196.86	0.00192595	2.1792
12	18KH1c_483	896	86	0.0959821	0.345526	14.9976	0.0308	14.7903	0.98618	32.4675	14.7903	0.0814	2.48475	195.6	14.7903	1230.2	2.48475	0.158999		18KH1c_483	0.0260338	10.1142	5.17241	4.15755	28.3784	4.61812	86.9347	166.205	345.528	604.396	931.25	1587.04	2944.1	4211.38	1170.08	0.0929768	0.0295284
12	18KH1c_486	460	16.8	0.0365217	0.909772	9.75297	0.0818	9.45278	0.969221	12.2249	9.45278	0.0807	2.4011	506.9	9.45278	1213.3	2.4011	0.417786		18KH1c_486	-0.0464135	0.766721	-0.0323276	4.15755	13.5135	2.84192	32.1608	89.4737	140.244	201.465	306.875	514.17	987.578	1556.91	1287.5	0.136321	0.0325653
12	18KH1c_490	239.5	102.8	0.429228	0.477209	13.0959	0.0348	12.8512	0.981311	28.7356	12.8512	0.0995	2.52006	220.5	12.8512	1613.9	2.52006	0.136626		18KH1c_490	-0.00421941	7.07993	-0.80819	6.12691	30.4054	5.50622	114.07	240.997	475.61	809.524	1037.5	1635.63	2385.09	2776.42	1122.7	0.0934957	0.0478264
12	18KH1c_50	145.7	110	0.754976	1.26054	14.986	0.111	14.5968	0.974025	9.00901	14.5968	0.0824	3.39344	678.6	14.5968	1254.2	3.39344	0.541062		18KH1c_50	-4.76793	29.0375	-7.5431	5.49234	40.5405	40.1421	169.347	207.756	322.764	461.538	598.125	834.008	1173.91	1540.65	820.91	0.48447	0.144258
12	18KH1c_59	427.1	78	0.182627	2.5541	6.77027	0.214	6.4956	0.959429	4.6729	6.4956	0.0866	1.90888	1250.1	6.4956	1350.7	1.90888	0.92552		18KH1c_59	-0.590717	5.04078	-23.7069	2.12254	15.473	12.7886	95.9799	144.044	249.593	412.088	635	971.66	1608.7	2069.11	1151.54	0.331854	0.0596632
12	18KH1c_6	340	252	0.741176	1.73026	7.68986	0.1301	7.21719	0.938533	7.6864	7.21719	0.0965	2.65445	788.4	7.21719	1556.7	2.65445	0.506456		18KH1c_6	-5.06329	63.2953	-6.46552	1.59737	20.9459	4.61812	30.6533	68.144	136.992	282.051	515	910.931	1763.98	2857.72	1093.86	0.182254	0.0173774
12	18KH1c_60	327.1	373.4	1.14155	2.17063	8.56611	0.175	8.32406	0.971744	5.71429	8.32406	0.09	2.02192	1039.6	8.32406	1424.7	2.02192	0.729697		18KH1c_60	-4.3038	8.95595	-84.0517	4.63895	46.6216	18.2948	224.121	365.651	536.585	976.19	1456.25	1874.49	2434.78	3105.69	1091.8	0.178976	0.0920495
12	18KH1c_63	310.5	35	0.112721	1.14665	14.33	0.1	14.1877	0.990069	10	14.1877	0.0832	2.01454	614.4	14.1877	1273	2.01454	0.482639		18KH1c_63	0.0213924	1.01142	0.311422	1.40044	25	1.2611	125.628	178.67	123.577	91.5751	88.75	85.0202	130.435	81.3008	1392.56	0.0225028	0.963149
12	18KH1c_64	320	438	1.36875	1.99113	5.36736	0.1524	4.96162	0.924406	6.56168	4.96162	0.0948	2.04717	914.4	4.96162	1523.3	2.04717	0.600276		18KH1c_64	-7.59494	40.9462	-323.276	10.9409	95.9459	48.135	530.653	1024.93	1577.24	2512.82	3743.75	5506.07	6645.96	7967.48	942.45	0.213325	0.079846
12	18KH1c_65	228.9	66.5	0.29052	4.17766	9.53773	0.309	9.34883	0.980194	3.23625	9.34883	0.0981	1.88884	1735.8	9.34883	1587.5	1.88884	1.09342		18KH1c_65	-1.01266	9.78793	-7.5431	1.15974	17.8378	2.84192	88.4422	195.014	334.959	661.172	1075	1724.7	2378.88	2906.5	1267.93	0.0715502	0.0371781
12	18KH1c_66	152.9	113.6	0.742969	0.112284	15.3566	0.0113	13.4721	0.877287	88.4956	13.4721	0.0721	7.37064	72.44	13.4721	987.8	7.37064	0.0733347		18KH1c_66	0.0203797	3.2137	-121.767	5.86433	41.8919	1.04796	55.2764	44.0443	57.3171	52.9304	56.25	78.9474	73.2919	69.9187	1307.07	0.0217775	0.754195
12	18KH1c_68	553	149.9	0.271067	0.113296	8.52632	0.00883	7.60419	0.891849	113.25	7.60419	0.0931	3.85674	56.67	7.60419	1489.1	3.85674	0.0380565		18KH1c_68	-0.970464	18.5971	-40.9483	1.13786	16.2162	1.61634	94.4724	173.407	309.756	635.531	1012.5	1514.17	2055.9	2650.41	1027.94	0.0412958	0.0459518
12	18KH1c_69	145	161.5	1.11379	3.54057	10.0986	0.282	9.84685	0.97507	3.5461	9.84685	0.0911	2.24087	1601.4	9.84685	1447.8	2.24087	1.10609		18KH1c_69	0.0202532	96.5742	-38.7931	4.28884	38.5135	22.7353	188.442	373.961	569.106	1025.64	1631.25	2198.38	3204.97	4130.08	897.13	0.266874	0.0587969
12	18KH1c_70	251.2	70.6	0.281051	1.79051	6.14058	0.1369	5.67339	0.923918	7.3046	5.67339	0.0949	2.34933	827.1	5.67339	1525.2	2.34933	0.54229		18KH1c_70	0.0211814	1.71289	-30.1724	2.01313	22.5	3.73002	91.9598	103.601	49.187	48.9011	45.625	43.3198	55.2795	45.935	1297.8	0.0820013	1.66354
12	18KH1c_72	169.6	45.8	0.270047	3.3543	7.3524	0.253	7.10211	0.965957	3.95257	7.10211	0.0962	1.90207	1453.9	7.10211	1550.8	1.90207	0.937516		18KH1c_72	0.0220253	13.3768	-34.4828	2.03501	14.7973	12.9663	97.9899	224.377	337.398	694.139	1150	1688.26	2664.6	3540.65	1082.53	0.340512	0.0367748
12	18KH1c_74	232.7	132	0.567254	1.90474	10.5964	0.157	10.4474	0.985935	6.36943	10.4474	0.08803	1.77096	940.1	10.4474	1382.3	1.77096	0.680098		18KH1c_74	0.021308	1.58238	-45.2586	3.1291	48.6486	0.888099	119.598	94.7368	69.1057	73.8095	63.125	70.8502	66.4596	44.7154	1289.56	0.011643	1.79956
12	18KH1c_75	1053	189	0.179487	2.16319	6.92135	0.18	6.5296	0.9434	5.55556	6.5296	0.0872	2.29552	1067	6.5296	1364.1	2.29552	0.782201		18KH1c_75	0.0229958	3.49103	0.324353	1.61926	16.7568	4.79574	80.402	207.756	334.553	648.352	1093.75	1712.55	2987.58	4191.06	1339	0.130655	0.0269121
12	18KH1c_78	259.1	146.4	0.565033	2.39293	4.50719	0.1884	4.14647	0.919969	5.30786	4.14647	0.09216	1.76678	1112.7	4.14647	1469.8	1.76678	0.757042		18KH1c_78	-0.506329	13.2137	-104.526	4.17943	33.1081	6.2167	181.91	351.801	500	888.278	1418.75	1809.72	2409.94	2914.63	1119.61	0.0801059	0.0754831
12	18KH1c_79	81.6	159.1	1.94975	2.96968	4.57891	0.2312	4.15488	0.907395	4.32526	4.15488	0.0932	1.92442	1340.8	4.15488	1491.1	1.92442	0.899202		18KH1c_79	0.0209283	113.214	-129.31	4.52954	16.7568	19.7158	143.216	240.997	333.333	597.07	987.5	1404.86	1981.37	2865.85	833.27	0.402461	0.0722815
12	18KH1c_82	119	66.5	0.558824	2.13497	4.5891	0.1648	4.10327	0.894133	6.06796	4.10327	0.094	2.055	983.4	4.10327	1507.3	2.055	0.652425		18KH1c_82	-1.98312	23.8173	-35.5603	3.78556	31.0811	16.1634	167.839	313.019	447.154	1003.66	1562.5	2433.2	3757.76	5243.9	781.77	0.223789	0.0446646
12	18KH1c_83	358	31	0.0865922	2.21665	12.0914	0.189	11.8653	0.981298	5.29101	11.8653	0.0851	2.3275	1116	11.8653	1316.9	2.3275	0.847445		18KH1c_83	-0.548523	0.897227	0.317888	0.853392	6.55405	0.319716	51.7588	134.072	242.276	417.582	643.75	1028.34	1652.17	2008.13	1400.8	0.0173587	0.0313277
12	18KH1c_85	669	322.2	0.481614	2.21926	7.39718	0.162	7.16908	0.969164	6.17284	7.16908	0.0994	1.82278	967.9	7.16908	1612	1.82278	0.600434		18KH1c_85	0.0213924	47.9608	-34.4828	0.984683	7.90541	0.728242	103.518	174.515	319.919	589.744	956.25	1267.21	2068.32	2491.87	1209.22	0.0254569	0.050049
12	18KH1c_87	468.7	204.6	0.436527	0.6343	13.1358	0.0503	12.9299	0.984322	19.8807	12.9299	0.0915	2.31692	316.4	12.9299	1456.2	2.31692	0.217278		18KH1c_87	0.0216034	10.7667	0.307112	0.919037	20.0676	7.9929	128.141	232.687	434.553	767.399	1343.75	1817.81	2770.19	3609.76	1276.17	0.157621	0.0462571
12	18KH1c_88	548	44	0.080292	1.10555	7.56133	0.1018	7.34392	0.971247	9.82318	7.34391	0.0788	1.80017	624.9	7.34391	1166.2	1.80017	0.535843		18KH1c_88	0.0203797	0.946166	-15.0862	2.8884	17.2297	4.61812	90.4523	149.584	193.089	300.366	511.25	781.377	1391.3	2191.06	1350.33	0.116981	0.0650126
12	18KH1c_89	1055	405	0.383886	1.02289	6.16368	0.0882	5.90824	0.958556	11.3379	5.90824	0.08415	1.75605	544.9	5.90824	1295.1	1.75605	0.42074		18KH1c_89	-11.3924	6.36215	-312.5	7.65864	122.973	26.2877	582.915	598.338	560.976	586.081	637.5	724.696	940.994	1227.64	1449.21	0.0981852	0.619467
12	18KH1c_90	734	158.7	0.216213	0.50718	9.1866	0.0482	9.01213	0.981008	20.7469	9.01213	0.07635	1.7819	303.5	9.01213	1103.4	1.7819	0.275059		18KH1c_90	-1.01266	3.96411	-56.0345	4.92341	32.4324	8.52575	97.4874	121.884	151.626	269.231	538.75	1174.09	2217.39	2947.15	1226.73	0.151624	0.0439649
12	18KH1c_91	1949	242.7	0.124525	0.122101	9.39112	0.0107	9.17158	0.976622	93.4579	9.17158	0.0828	2.01874	68.61	9.17158	1263.6	2.01874	0.0542972		18KH1c_91	-0.379747	4.12724	-66.8103	2.95405	22.973	0.746004	82.4121	158.449	296.748	569.597	1050	1789.47	2962.73	3829.27	1266.9	0.017145	0.0278162
12	18KH1c_92	554	152	0.274368	0.763236	7.47175	0.065	7.00381	0.937371	15.3846	7.0038	0.0852	2.60265	406	7.0038	1319.2	2.60265	0.307762		18KH1c_92	-0.886076	20.2284	-61.4224	3.91685	37.1622	9.59147	171.357	271.468	414.634	794.872	1268.75	1615.38	2521.74	3577.24	1030	0.120194	0.0679518
12	18KH1c_93	343.9	21.7	0.0630997	0.174202	8.05484	0.016	7.24953	0.900021	62.5	7.24953	0.079	3.51067	102.33	7.24953	1171.2	3.51067	0.0873719		18KH1c_93	-0.379747	1.43556	-23.7069	1.40044	10.4054	3.5524	48.7437	98.892	166.667	278.388	527.5	931.174	1664.6	2703.25	1267.93	0.157737	0.0292826
12	18KH1c_95	1081	40.9	0.0378353	0.419827	10.8362	0.0316	10.3845	0.958318	31.6456	10.3845	0.0964	3.09592	200.6	10.3845	1554.7	3.09592	0.129028		18KH1c_95	-1.39241	3.71941	-63.5776	0.547046	11.4865	1.19005	43.2161	90.0277	143.496	313.187	600	971.66	1788.82	2898.37	1555.3	0.0534134	0.024159
12	18KH1c_97	514.6	32.7	0.0635445	1.11124	13.2669	0.093	13.1066	0.987922	10.7527	13.1066	0.0867	2.05574	573.3	13.1066	1353	2.05574	0.423725		18KH1c_97	0.0204219	5.79119	-53.8793	0.656455	19.5946	5.50622	57.2864	195.845	345.122	727.106	1325	2170.04	4006.21	5040.65	1297.8	0.164346	0.0142994
15	18KH1cr-100	126.4	44.3	0.350475	0.850742	6.78218	0.0734	6.16702	0.909297	13.624	6.16702	0.0841	2.82239	456.6	6.16702	1294	2.82239	0.352859		18KH1cr-100	0.126582	1.7292	0.560345	8.75274	43.2432	0	54.7739	54.5706	70.3252	72.7106	83.75	75.3036	74.5342	60.9756	1987.9	0	0.734883
15	18KH1cr-103	135.1	161.9	1.19837	1.82747	7.09694	0.156	6.81039	0.959623	6.41026	6.81039	0.085	1.99628	934.5	6.81039	1314.7	1.99628	0.710809		18KH1cr-103	0	2.39804	0.603448	10.5033	39.1892	0	82.4121	58.4488	50	45.4212	47.5	38.4615	45.9627	30.4878	1421.4	0	1.79302
15	18KH1cr-105	248	288.6	1.16371	0.395538	13.308	0.028	13.0612	0.981455	35.7143	13.0612	0.1025	2.55106	178	13.0612	1669	2.55106	0.106651		18KH1cr-105	0	1.04405	1.72414	8.97155	25.6757	0	54.7739	53.4626	47.9675	75.0916	50	64.7773	73.913	26.0163	1359.6	0	0.741058
15	18KH1cr-109b	248.6	294	1.18262	0.617347	12.7485	0.0532	12.4326	0.975228	18.797	12.4326	0.0842	2.82001	334.1	12.4326	1296.3	2.82001	0.257734		18KH1cr-109b	0	2.28385	1.8319	4.814	46.6216	1.42096	69.3467	76.1773	66.2602	68.4982	67.5	67.6113	82.6087	95.5285	1380.2	0.0249905	0.83946
15	18KH1cr-111	92.6	3.92	0.0423326	0.11205	12.5592	0.0123	10.0235	0.798101	81.3008	10.0235	0.0661	7.56724	78.81	10.0235	808.6	7.56724	0.0974648		18KH1cr-111	0.151899	4.99184	2.58621	14.0044	52.027	3.5524	74.3719	64.8199	84.1463	68.1319	70	81.7814	78.2609	80.8943	1284.41	0.0571088	0.950307
15	18KH1cr-114	189.4	84.3	0.44509	0.980723	12.2941	0.0817	12.0934	0.983677	12.2399	12.0934	0.0871	2.21223	506.3	12.0934	1361.8	2.21223	0.371787		18KH1cr-114	0	1.06036	0.926724	14.8796	46.6216	-0.479574	95.9799	86.9806	76.4228	70.696	45	41.2955	47.205	36.9919	1133	-0.00716921	2.03326
15	18KH1cr-121	157.4	8.5	0.0540025	0.0224172	16.7961	0.00334	11.3141	0.673613	299.401	11.3141	0.0487	12.4137	21.5	11.3141	132	12.4137	0.162879		18KH1cr-121	0	5.23654	1.44397	14.6608	46.6216	5.50622	92.4623	146.814	153.659	190.476	226.25	255.061	250.932	191.057	1256.6	0.0838643	0.368476
15	18KH1cr-122	148.1	189.9	1.28224	2.86165	8.56166	0.232	8.09235	0.945185	4.31034	8.09235	0.0895	2.79568	1345	8.09235	1414	2.79568	0.951202		18KH1cr-122	0.139241	3.75204	1.2931	14.2232	34.4595	3.5524	52.7638	70.0831	84.9593	78.2051	78.125	59.5142	81.3665	66.2602	1122.7	0.0833104	0.648471
15	18KH1cr-126b	170.6	5.9	0.0345838	0.0522978	18.8841	0.00546	13.9275	0.737526	183.15	13.9275	0.0695	12.7528	35.1	13.9275	913	12.7528	0.0384447		18KH1cr-126b	0	5.70962	3.01724	13.7856	28.5811	1.95382	56.2814	58.1717	37.3984	43.0403	36.875	50.6073	48.4472	62.6016	1174.2	0.048715	1.16171
15	18KH1cr-133	181.1	165.7	0.914964	1.96076	5.67108	0.1427	4.85418	0.855954	7.00771	4.85418	0.0997	2.93225	859.9	4.85418	1617.7	2.93225	0.531557		18KH1cr-133	0.375527	1.17455	0.528017	14.8796	29.0541	0	127.638	104.709	65.8537	53.663	32.5	37.247	46.5839	67.4797	1287.5	0	2.73997
15	18KH1cr-134	55.6	2	0.0359712	0.697249	10.5786	0.068	10.1178	0.956442	14.7059	10.1178	0.0744	3.08815	424.1	10.1178	1051.4	3.08815	0.403367		18KH1cr-134	0	2.15334	0	3.06346	35.1351	4.79574	134.673	152.355	180.488	192.308	171.875	149.798	159.627	174.797	1318.4	0.0697178	0.843674
15	18KH1cr-142	210	27.1	0.129048	0.0374791	14.4891	0.00599	9.78987	0.675672	166.945	9.78987	0.0454	10.6814	38.5	9.78987	0.0001	10.6814	385000		18KH1cr-142	0	22.186	28.8793	159.737	210.135	16.6963	296.482	216.066	212.195	201.465	145.625	175.304	162.112	136.992	1369.9	0.0668915	1.82888
15	18KH1cr-152	301.7	346.2	1.1475	1.7415	5.1794	0.1375	4.80448	0.927614	7.27273	4.80448	0.0919	1.93471	830.5	4.80448	1464.5	1.93471	0.567088		18KH1cr-152	0.101266	1.27243	2.15517	24.9453	51.3514	0.763766	121.106	130.194	109.756	108.059	94.375	102.024	94.4099	60.9756	1390.5	0.00968506	1.28276
15	18KH1cr-153	316	382.6	1.21076	1.91766	5.92237	0.1537	5.69047	0.960843	6.50618	5.69047	0.09053	1.64105	921.7	5.69047	1435.9	1.64105	0.641897		18KH1cr-153	4.17722	7.01468	7.65086	31.5098	60.8108	0	88.9447	68.6981	71.5447	86.63	61.875	76.1134	99.3789	92.2764	1236	0	0.895006
15	18KH1cr-16	109.8	414	3.77049	0.0233424	19.8436	0.00243	13.7736	0.694109	411.523	13.7736	0.0697	14.2848	15.65	13.7736	919	14.2848	0.0170294		18KH1cr-16	0	5.41599	0.905172	20.1313	31.7568	2.6643	39.196	39.0582	37.3984	32.7839	36.5	25.1012	42.236	34.5528	1658.3	0.0755169	0.928022
15	18KH1cr-171	244.5	422.5	1.72802	2.02787	4.93855	0.1567	4.57654	0.926697	6.38162	4.57654	0.0939	1.85595	938.4	4.57654	1505.3	1.85595	0.623397		18KH1cr-171	1.68776	3.91517	7.86638	40.4814	60.8108	-2.41563	136.683	110.803	81.3008	44.6886	27.5	29.5547	35.4037	26.8293	1339	-0.0264961	3.86071
15	18KH1cr-174	232.9	72.8	0.312581	0.945922	5.81283	0.0836	5.41685	0.931878	11.9617	5.41685	0.0821	2.10874	517.6	5.41685	1247	2.10874	0.415076		18KH1cr-174	-0.178059	1.38662	2.04741	15.5361	60.1351	0	131.658	103.324	90.2439	71.6117	73.125	50.2024	43.4783	64.2276	1163.9	0	3.02814
15	18KH1cr-175a	384.1	395.5	1.02968	2.02344	5.92419	0.1595	5.6321	0.950695	6.26959	5.6321	0.09205	1.83726	954	5.6321	1467.6	1.83726	0.650041		18KH1cr-175a	0	1.63132	1.93966	21.663	69.5946	-0.50444	85.9296	76.7313	91.8699	84.4322	80.625	56.2753	57.1429	81.7073	1236	-0.00652305	1.50377
15	18KH1cr-175c	94.1	97	1.03082	1.48147	7.59541	0.1292	7.189	0.946492	7.73994	7.189	0.0832	2.45125	783.3	7.189	1273	2.45125	0.615318		18KH1cr-175c	0	3.27896	2.80172	17.2867	50	0	62.8141	85.8726	80.4878	87.1795	62.5	63.5628	82.6087	63.4146	1163.9	0	0.760381
15	18KH1cr-34	312.7	414	1.32395	2.40227	5.56376	0.1905	5.30177	0.952913	5.24934	5.30177	0.0915	1.68718	1124.1	5.30177	1456.2	1.68718	0.771941		18KH1cr-34	0.265823	1.4845	1.8319	8.53392	32.4324	2.48668	35.6784	62.8809	50.4065	59.1575	61.875	43.7247	68.9441	70.7317	1339	0.0731017	0.517497
15	18KH1cr-4	221	178.2	0.806335	1.56515	7.42226	0.1332	7.2086	0.971214	7.50751	7.2086	0.08526	1.76806	806.1	7.2086	1320.6	1.76806	0.610404		18KH1cr-4	0.265823	3.24633	1.50862	15.7549	33.1081	0	51.7588	45.1524	30.4878	39.3773	46.25	56.6802	44.7205	28.4553	1028.97	0	1.15738
15	18KH1cr-42	275.6	314.9	1.1426	2.41165	11.5776	0.205	11.4528	0.989227	4.87805	11.4528	0.08536	1.69486	1202.1	11.4528	1322.9	1.69486	0.908685		18KH1cr-42	0.227848	2.08809	2.04741	21.663	61.4865	0.692718	101.508	107.202	90.2439	78.7546	78.125	98.7854	105.59	96.748	1627.4	0.00876834	0.961336
15	18KH1cr-5	269.2	105	0.390045	0.3282	9.8759	0.0252	9.02805	0.914149	39.6825	9.02805	0.0945	4.00348	160.44	9.02805	1517.3	4.00348	0.10574		18KH1cr-5	0	1.41925	-0.372845	20.3501	79.0541	0	114.573	100.831	95.5285	99.6337	70.625	66.3968	63.9752	54.4715	1215.4	0	1.7909
15	18KH1cr-54	206.2	304.8	1.47818	2.25269	4.33054	0.1916	3.88541	0.897213	5.21921	3.88541	0.08531	1.91235	1130	3.88541	1321.7	1.91235	0.85496		18KH1cr-54	-0.460338	3.50734	2.47845	23.1947	35.8108	1.17229	77.3869	57.3407	77.6423	68.315	58.125	48.583	73.913	69.5122	1349.3	0.0222687	1.047
15	18KH1cr-6	61.3	81.6	1.33116	0.972405	9.74704	0.0791	9.02126	0.925538	12.6422	9.02125	0.0892	3.69076	490.7	9.02125	1407.6	3.69076	0.348608		18KH1cr-6	0	2.25122	1.50862	7.22101	27.7027	0	47.7387	46.2604	56.0976	54.5788	55.625	49.7976	51.5528	51.626	1390.5	0	0.926016
15	18KH1cr-61	100.9	156.2	1.54807	0.181696	11.1347	0.0146	9.19637	0.82592	68.4931	9.19637	0.0903	6.27761	93.44	9.19637	1431	6.27761	0.065297		18KH1cr-61	0	2.41436	1.25	15.7549	31.0811	0.728242	47.2362	44.8753	43.9024	31.3187	35	26.3158	47.8261	43.4959	1143.3	0.019006	0.987666
15	18KH1cr-66	302.3	224.3	0.741978	1.48935	5.27693	0.1243	4.98685	0.945028	8.04505	4.98685	0.08694	1.72549	755.3	4.98685	1358.3	1.72549	0.556063		18KH1cr-66	-0.509283	2.16966	0.689655	17.0678	54.7297	1.42096	74.8744	84.4875	84.5528	84.2491	91.25	79.3522	92.5466	106.911	1359.6	0.0221975	0.809045
15	18KH1cr-69	226.7	91.3	0.402735	3.36885	6.62914	0.271	6.33624	0.955816	3.69004	6.33624	0.0902	1.94875	1545.9	6.33624	1428.9	1.94875	1.08188		18KH1cr-69	0.151899	1.06036	2.58621	13.5667	40.5405	0.550622	51.2563	73.4072	59.3496	70.3297	61.875	64.3725	63.9752	55.6911	1236	0.0120791	0.80119
15	18KH1cr-73	208.3	142.2	0.682669	1.19571	9.2835	0.0941	9.01255	0.970814	10.627	9.01256	0.0922	2.22648	579.7	9.01256	1470.7	2.22648	0.394166		18KH1cr-73	0	1.14192	2.26293	11.1597	36.4865	0	58.2915	59.5568	48.7805	38.2784	52.5	54.6559	45.9627	26.8293	1266.9	0	1.26823
15	18KH1cr-8	395	371.4	0.940253	1.5602	7.9555	0.1239	7.7734	0.97711	8.07103	7.7734	0.09137	1.69242	753	7.7734	1453.5	1.69242	0.51806		18KH1cr-8	0.506329	1.37031	0.915948	20.3501	49.3243	1.06572	59.799	45.9834	58.1301	63.37	57.5	61.5385	65.2174	65.0407	1472.9	0.019623	0.916918
15	18KH1cr-80b	438	39.9	0.0910959	2.63074	6.33359	0.212	6.10982	0.964668	4.71698	6.10982	0.09004	1.6687	1239.5	6.10982	1425.5	1.6687	0.869519		18KH1cr-80b	-0.183122	0.619902	0	7.43982	31.7568	0	166.834	152.632	107.724	61.3553	51.25	39.2713	45.9627	34.9593	1411.1	0	3.62977
15	18KH1cr-84	186.1	287	1.54218	2.32714	9.78328	0.193	9.60584	0.981863	5.18135	9.60584	0.08749	1.85481	1137.6	9.60584	1370.4	1.85481	0.830123		18KH1cr-84	1.35021	3.83361	2.15517	20.7877	68.2432	-0.426288	65.8291	56.7867	61.7886	78.7546	67.5	60.7287	62.1118	85.7724	1277.2	-0.0063601	1.05985
15	18KH1cr-94	165.8	185.8	1.12063	0.697999	8.46419	0.0646	7.92618	0.936437	15.4799	7.92618	0.0784	2.96953	403.5	7.92618	1156.1	2.96953	0.349018		18KH1cr-94	0	2.44698	2.47845	10.5033	43.2432	0.71048	52.7638	49.5845	37.3984	63.0037	47.5	48.1781	60.8696	59.3496	1442	0.0148739	0.866834
15	18KH1cr-9b	213	177.7	0.834272	2.79174	5.70892	0.225	5.40289	0.946395	4.44444	5.40289	0.09003	1.84405	1308.2	5.40289	1425.3	1.84405	0.917842		18KH1cr-9b	0	1.17455	1.40086	13.7856	50	-0.529307	85.9296	88.0886	77.6423	57.326	48.125	62.753	59.0062	67.4797	1349.3	-0.00807516	1.45628
15	18KH1r_MR1_1	391	203.7	0.520972	1.74567	12.4147	0.149	12.2975	0.990564	6.71141	12.2975	0.08501	1.70148	895.4	12.2975	1314.9	1.70148	0.680964		18KH1r_MR1_1	0	1.92496	1.07759	6.34573	23.6486	0	59.2965	38.7812	50.813	73.4432	63.125	72.8745	78.2609	97.1545	1442	0	0.757677
15	18KH1r_MR1_10	416	446	1.07212	2.67863	12.4441	0.215	12.3098	0.98921	4.65116	12.3098	0.0904	1.82311	1255.4	12.3098	1433.1	1.82311	0.876003		18KH1r_MR1_10	0.0135021	1.56607	2.69397	7.00219	25.6757	0	28.1407	28.5319	41.0569	36.8132	38.75	51.0121	52.1739	65.0407	1278.23	0	0.539363
15	18KH1r_MR1_11	245.2	328.6	1.34013	1.92512	10.1685	0.186	9.94698	0.978216	5.37634	9.94698	0.0751	2.11087	1099.7	9.94698	1070.3	2.11087	1.02747		18KH1r_MR1_11	-0.0122363	3.88254	4.4181	10.0656	37.1622	1.17229	42.7136	37.3961	40.2439	39.011	51.25	52.6316	65.2174	77.6423	1266.9	0.029424	0.654941
15	18KH1r_MR1_12	317	109.4	0.34511	1.76747	6.9364	0.1464	6.62773	0.955499	6.8306	6.62773	0.0876	2.0462	880.8	6.62773	1372.9	2.0462	0.641562		18KH1r_MR1_12	0	1.25612	0.247845	15.9737	99.3243	0	172.362	119.945	113.008	82.4176	74.375	78.9474	86.9565	77.6423	1153.6	0	1.98216
15	18KH1r_MR1_13	204.9	79.3	0.387018	0.575507	8.39443	0.0485	7.77085	0.925715	20.6186	7.77086	0.0861	3.17495	305.3	7.77086	1339.6	3.17495	0.227904		18KH1r_MR1_13	0.0421941	1.9739	1.61638	11.3786	70.9459	1.59858	122.111	70.9141	70.3252	53.4799	51.875	39.2713	49.6894	41.8699	1207.16	0.0171749	2.45747
15	18KH1r_MR1_14	240.6	82	0.340815	2.5672	5.14377	0.2124	4.77994	0.929267	4.7081	4.77994	0.0877	1.90015	1241.6	4.77994	1375.1	1.90015	0.902916		18KH1r_MR1_14	0	1.61501	1.72414	13.3479	113.514	0.62167	160.804	114.127	91.8699	76.7399	59.375	70.4453	66.4596	63.0081	1159.78	0.00460137	2.41957
15	18KH1r_MR1_16	591	35.6	0.0602369	2.38634	3.92901	0.1951	3.55945	0.90594	5.12558	3.55945	0.08875	1.66357	1148.9	3.55945	1397.9	1.66357	0.821876		18KH1r_MR1_16	0	0.831974	0.872845	3.43545	80.4054	0.62167	223.618	180.055	117.073	58.6081	56.875	54.251	49.0683	57.3171	1349.3	0.00463621	4.55728
15	18KH1r_MR1_17	329	385	1.17021	0.0528336	15.5696	0.00543	14.3658	0.922683	184.162	14.3658	0.0706	6.00299	34.91	14.3658	944.9	6.00299	0.0369457		18KH1r_MR1_17	0.156118	3.0832	4.74138	12.2538	64.8649	6.39432	62.8141	49.0305	43.9024	39.5604	40.625	47.3684	45.9627	32.5203	1318.4	0.100175	1.36663
15	18KH1r_MR1_3	521	56.2	0.107869	0.864036	11.9297	0.0729	11.7499	0.984929	13.7174	11.7499	0.086	2.06335	453.6	11.7499	1337.3	2.06335	0.339191		18KH1r_MR1_3	0	0.587276	0	6.12691	48.6486	0.461812	131.156	92.5208	69.9187	27.6557	23.75	12.1457	6.58385	14.6341	1443.03	0.00578144	19.9208
15	18KH1r_MR1_5	266.3	314.7	1.18175	1.68833	8.01504	0.1314	7.80474	0.973761	7.61035	7.80474	0.09323	1.824	795.8	7.80474	1491.7	1.824	0.533485		18KH1r_MR1_5	0	0.783034	3.87931	9.62801	47.2973	0	58.2915	44.0443	50.4065	55.3114	48.75	43.7247	49.6894	37.3984	1308.1	0	1.17312
15	18KH1r_MR1_7	280	151	0.539286	0.182719	14.0548	0.014	13.0612	0.929306	71.4286	13.0612	0.0947	5.19059	89.62	13.0612	1521.3	5.19059	0.0589101		18KH1r_MR1_7	0.0590717	1.89233	0.969828	12.9103	56.7568	0.586146	116.08	73.6842	86.1789	75.641	95.625	76.9231	98.1366	75.2033	1206.13	0.00722133	1.18284
15	18KH1r_MR1_8	250.8	118.3	0.471691	1.83376	11.1817	0.149	10.9818	0.982126	6.71141	10.9818	0.0893	2.10468	895.4	10.9818	1409.7	2.10468	0.635171		18KH1r_MR1_8	0	0.978793	0	9.62801	68.9189	1.01243	128.141	99.446	71.9512	61.7216	53.75	48.583	50.9317	49.5935	1163.9	0.0107734	2.51593
15	18KH1r_MR1_9	269	64	0.237918	0.509386	10.5069	0.0376	10.1056	0.961808	26.5957	10.1056	0.0983	2.876	237.9	10.1056	1591.3	2.876	0.1495		18KH1r_MR1_9	0	0.554649	1.07759	4.15755	47.973	0.657194	109.045	83.1025	65.0407	43.4066	35	31.1741	32.2981	32.1138	1431.7	0.0090864	3.37621
35	18KH9_1	344.3	222.9	0.647401	0.0200591	9.78207	0.00311	8.0525	0.82319	321.543	8.0525	0.0468	5.55393	20.02	8.0525	38	5.55393	0.526842		18KH9_1	0.240506	19.7227	5.52802	9.58425	30.1351	3.48135	38.6432	47.3684	48.374	53.1136	49.875	61.5385	74.472	76.0163	1946.7	0.102017	0.518896
35	18KH9_10	529.2	64.3	0.121504	2.29037	3.40354	0.1806	2.97224	0.873281	5.5371	2.97224	0.09202	1.65826	1070.3	2.97224	1466.9	1.65826	0.729634		18KH9_10	-15.6118	9.33116	1.8319	1.94748	18.2432	12.7886	88.9447	202.216	352.439	615.385	1018.75	1433.2	2366.46	2455.28	1141.24	0.317478	0.0375856
35	18KH9_12	324	42.2	0.130247	0.533579	5.44157	0.0471	5.01688	0.921955	21.2314	5.01688	0.0822	2.1075	296.69	5.01688	1249.4	2.1075	0.237466		18KH9_12	-2.19409	1.63132	1.27155	3.21663	33.2432	1.49201	75.3769	101.108	82.9268	66.4835	64.375	76.1134	101.863	115.041	1400.8	0.0298058	0.73998
35	18KH9_13	272.2	76.5	0.281043	0.00558461	13.3341	0.000756	3.12557	0.234405	1322.75	3.12557	0.0536	12.9626	4.872	3.12557	353	12.9626	0.0138017		18KH9_13	-4.64135	7.84666	4.71983	6.36761	28.8514	4.26288	44.7236	78.6704	111.789	179.487	265.625	421.053	670.807	853.659	1545	0.118673	0.0666713
35	18KH9_14	307.1	147.4	0.479974	0.00565605	11.4182	0.000675	3.19817	0.280094	1481.48	3.19817	0.0608	10.9612	4.35	3.19817	631	10.9612	0.00689382		18KH9_14	-67.0886	17.3899	12.8233	10.3282	23.4459	4.10302	52.7136	93.0748	138.211	213.553	340.625	478.947	742.236	914.634	1380.2	0.11671	0.07102
35	18KH9_16	352.4	104.7	0.297106	0.593103	4.93712	0.0497	4.63506	0.938819	20.1207	4.63506	0.08659	1.7004	312.68	4.63506	1350.5	1.7004	0.231529		18KH9_16	-1.77215	39.6411	1.12069	2.62582	24.527	12.9663	95.9799	234.349	404.065	725.275	1143.75	1692.31	2720.5	3207.32	1149.48	0.26724	0.0352803
35	18KH9_17	522.8	53.08	0.10153	2.11253	3.33581	0.1777	2.9211	0.87568	5.62746	2.9211	0.08626	1.61083	1054.4	2.9211	1343.1	1.61083	0.78505		18KH9_17	-0.92827	1.50082	2.04741	2.93217	51.6892	2.59325	159.296	146.814	80.4878	65.0183	80.625	98.3806	192.547	219.512	1359.6	0.0285786	0.827314
35	18KH9_18	273.9	65.8	0.240234	0.520868	11.5586	0.0457	11.3943	0.98578	21.8818	11.3943	0.0827	1.9423	288.1	11.3943	1261.3	1.9423	0.228415		18KH9_18	-7.25738	3.50734	2.32759	3.58862	37.973	1.45648	77.8894	75.9003	51.8699	39.011	32.9375	31.1741	41.6149	36.1789	1258.66	0.0267811	1.87167
35	18KH9_20	549	83.2	0.151548	0.295835	6.25508	0.0258	5.89367	0.942222	38.7597	5.89367	0.0832	2.09539	164.21	5.89367	1273	2.09539	0.128995		18KH9_20	-2.1097	11.2724	1.44397	1.79431	15.2703	6.00355	57.2864	139.058	247.154	441.392	737.5	1121.46	1826.09	2093.5	1242.18	0.202983	0.0313711
35	18KH9_21	216.5	96.8	0.447113	2.569	3.81145	0.2251	3.35559	0.880397	4.44247	3.35559	0.08281	1.80753	1308.8	3.35559	1263.9	1.80753	1.03552		18KH9_21	-1.68776	4.77977	4.69828	6.03939	43.6486	2.96625	63.3166	73.4072	69.9187	66.3004	65.625	67.6113	81.9876	73.9837	1146.39	0.056424	0.77227
35	18KH9_23	575.1	40.7	0.0707703	1.4174	4.01287	0.122	3.677	0.916301	8.19672	3.677	0.0843	1.60712	742.1	3.677	1298.6	1.60712	0.571462		18KH9_23	-40.0844	2.41436	2.17672	1.75055	12.8378	3.62345	48.7437	137.119	265.041	476.19	775	1182.19	1975.16	2430.89	1596.5	0.144849	0.0246784
35	18KH9_24	437.1	150.4	0.344086	0.812386	7.31583	0.0653	7.11986	0.973214	15.3139	7.11986	0.09027	1.68193	407.8	7.11986	1430.4	1.68193	0.285095		18KH9_24	1.68776	41.5987	1.18534	4.44201	21.4189	20.4263	93.4673	221.607	448.78	840.659	1281.25	1858.3	2975.16	3455.28	1181.41	0.456521	0.031416
35	18KH9_25	460	24	0.0521739	0.00415891	11.3347	0.000536	2.96154	0.261282	1865.67	2.96154	0.0563	10.9409	3.454	2.96154	463	10.9409	0.00746004		18KH9_25	0.548523	9.6248	3.59914	8.16193	11.8919	3.39254	40.0503	95.8449	161.789	236.264	323.75	459.919	654.658	747.967	1586.2	0.155452	0.0611773
35	18KH9_27	407.9	136.1	0.33366	0.0050072	16.2367	0.00062	6.39562	0.393899	1612.9	6.39562	0.0586	14.924	4	6.39562	551	14.924	0.00725953		18KH9_27	0.970464	8.45024	2.67241	12.1225	52.973	9.59147	72.3618	95.5679	137.805	206.044	324.375	495.951	826.087	983.74	1555.3	0.154919	0.0875959
35	18KH9_28	427.8	241	0.563347	0.178357	8.31655	0.0143	8.0288	0.965399	69.9301	8.0288	0.0905	2.16875	91.53	8.0288	1435.2	2.16875	0.0637751		18KH9_28	0.443038	38.3361	0.894397	4.11379	24.1892	15.2753	83.9196	173.13	335.366	586.081	941.25	1396.76	2378.88	2817.07	1112.4	0.339037	0.0352769
35	18KH9_29	253	122.1	0.482609	0.00848187	13.3446	0.00098	8.28484	0.620839	1020.41	8.28484	0.0628	10.4613	6.31	8.28484	701	10.4613	0.00900143		18KH9_29	0.14346	9.70636	2.32759	16.674	75	16.341	97.4874	127.978	220.732	364.469	525	753.036	1217.39	1333.33	1264.84	0.191106	0.080079
35	18KH9_3	250.2	82.2	0.328537	3.49429	4.00431	0.2774	3.66065	0.914179	3.6049	3.66065	0.0914	1.62298	1578.3	3.66065	1454.1	1.62298	1.08541		18KH9_3	0.957806	2.16966	1.42241	2.62582	26.7568	0.746004	47.1357	43.7673	27.4797	16.3004	11.1875	9.91903	9.62733	7.19512	1318.4	0.0210063	4.89603
35	18KH9_31	235.4	85	0.361088	0.276354	13.4753	0.0239	12.7613	0.947015	41.841	12.7613	0.0839	4.32813	152.26	12.7613	1289.4	4.32813	0.118086		18KH9_31	0.0181435	1.85971	0.80819	4.35449	23.7162	1.81172	47.2864	57.8947	48.0894	38.6447	34.5625	33.1984	42.236	43.0894	1283.38	0.0541004	1.11958
35	18KH9_32	513	114.7	0.223587	1.65372	4.65624	0.1289	4.37685	0.939996	7.75795	4.37685	0.09309	1.58864	781.6	4.37685	1488.9	1.58864	0.524951		18KH9_32	0.0675105	4.99184	0.571121	4.35449	18.3108	10.3197	79.397	162.05	293.902	505.495	698.75	1012.15	1490.68	1776.42	1158.75	0.270652	0.0532621
35	18KH9_34	312.6	237.4	0.759437	0.0873708	11.0468	0.00659	10.4238	0.943607	151.745	10.4238	0.0962	3.65723	42.34	10.4238	1550.8	3.65723	0.027302		18KH9_34	0.0320675	3.50734	2.95259	14.3326	40.6081	4.92007	52.8141	53.7396	57.7236	50.7326	54.125	53.4413	62.4224	58.9431	1761.3	0.106241	0.846076
35	18KH9_35	867	58	0.0668973	0.330746	6.36047	0.0301	6.0982	0.958766	33.2226	6.09821	0.07973	1.80762	191.17	6.09821	1189.4	1.80762	0.160728		18KH9_35	1.77215	4.51876	1.17457	3.8512	18.1757	11.0657	84.4221	164.266	284.146	461.538	611.25	793.522	1217.39	1410.57	1318.4	0.282492	0.0693467
35	18KH9_36	240.4	88.7	0.368968	2.15323	3.03337	0.1726	2.5754	0.849023	5.79374	2.5754	0.09052	1.6027	1026.4	2.5754	1435.7	1.6027	0.714913		18KH9_36	-0.000455696	10.522	0.732759	3.78556	26.0811	21.6696	118.09	234.349	443.902	811.355	1231.25	1615.38	2534.16	2764.23	1061.93	0.390464	0.0465994
35	18KH9_38	572.9	211.2	0.368651	2.19048	5.72721	0.1623	5.49524	0.959496	6.16143	5.49524	0.09793	1.61347	969.5	5.49524	1584.2	1.61347	0.611981		18KH9_38	0.421941	9.28222	0.948276	3.43545	19.9324	3.7833	96.4824	183.657	364.634	650.183	983.125	1287.45	1857.14	2162.6	1080.47	0.0862714	0.0519521
35	18KH9_39	394.7	98.3	0.24905	0.00531785	10.4063	0.000708	3.86595	0.371499	1412.43	3.86595	0.0545	9.6616	4.562	3.86595	391	9.6616	0.0116675		18KH9_39	0.510549	4.53507	2.11207	7.57112	40.2703	8.04618	74.3719	100	104.065	128.205	168.75	234.008	357.143	398.374	1658.3	0.147026	0.208241
35	18KH9_4	425	48.97	0.115224	0.00374767	13.9298	0.000563	3.2591	0.233967	1776.2	3.2591	0.0483	13.5431	3.628	3.2591	113	13.5431	0.0321062		18KH9_4	-40.0844	5.56281	5.85129	4.68271	26.5541	3.39254	74.8744	117.452	147.154	186.813	245.625	336.032	633.54	703.252	1366.81	0.0760839	0.118184
35	18KH9_40	263.7	226.8	0.860068	2.65599	5.53981	0.21	5.28826	0.954593	4.7619	5.28826	0.09177	1.65037	1228.8	5.28826	1461.8	1.65037	0.840607		18KH9_40	0.21519	3.0832	3.31897	13.7856	29.527	0.426288	38.0402	42.1053	47.9675	43.7729	40.625	45.5466	53.5404	51.2195	1709.8	0.0127195	0.710496
35	18KH9_41	430	268.6	0.624651	1.15019	4.00116	0.0913	3.66056	0.914874	10.9529	3.66056	0.09141	1.61542	563.22	3.66056	1454.3	1.61542	0.387279		18KH9_41	0.189873	50.4078	0.883621	5.36105	29.8649	17.9396	109.045	218.006	409.756	706.96	1068.75	1465.59	2192.55	2589.43	1015.58	0.314362	0.0497345
35	18KH9_44	230.3	143.9	0.624837	0.0101593	10.5675	0.001314	6.01284	0.568993	761.035	6.01284	0.0561	8.69011	8.47	6.01284	455.3	8.69011	0.0186031		18KH9_44	0.383966	19.7716	3.26509	15.558	28.5811	3.62345	37.6382	35.1801	46.3415	43.0403	49.8125	58.2996	75.0311	80.8943	1524.4	0.110476	0.501635
35	18KH9_45	226.2	102.7	0.454023	1.23414	5.30507	0.0993	4.99239	0.941059	10.0705	4.99239	0.09018	1.79439	610.3	4.99239	1428.5	1.79439	0.427231		18KH9_45	0.0759494	26.7537	1.25	5.27352	30.0676	29.8401	97.9899	177.008	351.626	531.136	835.625	1157.89	1844.72	1995.93	984.68	0.549745	0.0531191
35	18KH9_46	201.7	46.3	0.229549	0.838038	3.92959	0.0762	3.29697	0.83901	13.1234	3.29697	0.0798	2.13815	473.4	3.29697	1191.2	2.13815	0.397414		18KH9_46	0.0312236	1.69657	1.07759	6.41138	45.6081	1.50977	110.553	99.169	67.4797	39.3773	24.875	19.5142	23.7267	26.0976	1318.4	0.021262	4.65942
35	18KH9_48	1072	165.2	0.154104	0.719336	5.54061	0.0542	5.15418	0.930255	18.4502	5.15418	0.0963	2.03292	340.26	5.15418	1552.8	2.03292	0.219127		18KH9_48	0.0632911	11.2072	0.452586	4.15755	18.1081	6.73179	71.3568	161.219	326.829	531.136	865.625	1453.44	2639.75	2845.53	1308.1	0.187274	0.0270316
35	18KH9_5	330.5	62.3	0.188502	1.5882	4.91407	0.1285	4.58715	0.933472	7.7821	4.58715	0.08968	1.76243	779.3	4.58715	1417.9	1.76243	0.549616		18KH9_5	-5.48523	6.50897	2.87716	4.814	34.5946	23.6234	145.226	276.177	457.724	826.007	1268.75	1753.04	2732.92	2971.54	1060.9	0.333286	0.0531396
35	18KH9_50	356.7	68.73	0.192683	0.00655766	9.40073	0.00074	6.88219	0.732091	1351.35	6.88219	0.0643	6.40385	4.77	6.88219	750.6	6.40385	0.00635492		18KH9_50	0.278481	15.0245	1.13147	5.33917	23.3108	14.7425	91.9598	171.468	379.268	611.722	918.75	1246.96	2012.42	2296.75	1095.92	0.318414	0.0456961
35	18KH9_51	412	52.2	0.126699	0.320582	6.84129	0.0293	6.55978	0.95885	34.1297	6.55978	0.07939	1.94232	186.17	6.55978	1181	1.94232	0.157638		18KH9_51	0.0506329	2.39804	0.80819	4.55142	37.6351	4.42274	82.4121	122.161	138.618	122.894	115	129.15	147.205	148.374	1483.2	0.0794143	0.559846
35	18KH9_52	378	62.2	0.16455	0.0235007	13.7981	0.00196	12.9608	0.939317	510.204	12.9608	0.087	4.73345	12.62	12.9608	1359.6	4.73345	0.00928214		18KH9_52	0.0886076	2.65905	1.00216	4.90153	23.5135	3.67673	53.7186	98.338	143.902	194.139	287.5	493.927	788.82	1020.33	1648	0.103452	0.0680999
35	18KH9_53	540.6	14.22	0.0263041	2.19852	4.40233	0.1759	4.067	0.923829	5.68505	4.067	0.09069	1.68524	1044.5	4.067	1439.2	1.68524	0.72575		18KH9_53	0.109705	0.352365	0.162716	0.365427	9.12162	1.70515	53.2663	115.235	161.382	162.454	186.875	266.802	404.348	487.398	1709.8	0.0773571	0.131734
35	18KH9_54	629	97	0.154213	0.283817	8.36269	0.0244	8.11946	0.970914	40.9836	8.11946	0.0844	2.00226	155.4	8.11946	1300.9	2.00226	0.119456		18KH9_54	0.523207	6.00326	0.700431	4.68271	17.2297	6.05684	69.3467	142.105	297.154	465.201	701.25	1080.97	1701.86	2056.91	1709.8	0.175224	0.0407475
35	18KH9_55	451	65	0.144124	1.02428	4.97934	0.0849	4.7207	0.948056	11.7786	4.7207	0.08754	1.58394	525.3	4.7207	1371.5	1.58394	0.383011		18KH9_55	0.0843882	6.73736	0.219828	1.48796	9.7973	2.8952	51.7588	113.019	225.203	360.806	575	838.057	1180.12	1373.98	1575.9	0.128568	0.0438588
35	18KH9_56	430.6	143.2	0.332559	0.0640316	8.59854	0.0051	8.17342	0.950559	196.078	8.17342	0.0911	2.67023	32.79	8.17342	1447.8	2.67023	0.0226482		18KH9_56	1.01266	3.3279	2.26293	11.9256	36.4189	4.51155	45.2261	47.0914	50	44.6886	47.25	49.7976	53.913	47.9675	1998.2	0.111165	0.838872
35	18KH9_57	338.3	41.6	0.122968	0.60106	7.8876	0.0499	7.57218	0.960011	20.0401	7.57218	0.0874	2.20823	313.9	7.57218	1368.5	2.20823	0.229375		18KH9_57	0.0156118	1.51713	0.528017	2.93217	17.3649	2.02487	55.9799	91.6898	132.927	199.634	298.75	392.713	645.963	796.748	1483.2	0.0649448	0.0866612
35	18KH9_6	146.2	145.1	0.992476	0.0167543	11.0681	0.00232	7.26997	0.656839	431.034	7.26997	0.0524	8.34569	14.94	7.26997	301.9	8.34569	0.0494866		18KH9_6	-6.58228	16.4111	11.1853	13.9606	35.4054	4.68917	42.4121	51.5235	49.3496	48.1685	48.1875	51.417	60.0621	57.7236	1390.5	0.121009	0.706137
35	18KH9_60	538	41.4	0.0769517	1.96842	4.90916	0.164	4.63527	0.944207	6.09756	4.63527	0.08709	1.61684	979	4.63527	1361.6	1.61684	0.719007		18KH9_60	0.0506329	2.57749	0.264009	1.42232	9.39189	3.48135	53.6683	138.227	280.488	432.234	666.875	1036.44	1621.12	1829.27	1781.9	0.155064	0.0331058
35	18KH9_61	213.8	197.3	0.922825	3.12208	3.11018	0.2427	2.69305	0.865883	4.12031	2.69305	0.09334	1.55586	1400.7	2.69305	1493.9	1.55586	0.937613		18KH9_61	0.0341772	57.7488	0.571121	4.52954	24.7973	12.4512	90.4523	169.806	286.585	463.37	714.375	1032.39	1521.74	1857.72	1079.44	0.262904	0.0594401
35	18KH9_62	279	112.6	0.403584	1.02702	5.14843	0.0862	4.86972	0.945866	11.6009	4.86972	0.08645	1.67096	533	4.86972	1347.4	1.67096	0.395577		18KH9_62	0.0548523	30.3426	0.678879	5.0547	35.4054	13.9964	135.678	266.482	516.26	849.817	1318.75	1858.3	2770.19	3150.41	1012.49	0.201942	0.0489781
35	18KH9_63	421	23.6	0.056057	1.51583	4.92045	0.1277	4.60868	0.936637	7.83085	4.60868	0.08613	1.72364	774.7	4.60868	1340.2	1.72364	0.578048		18KH9_63	0.0417722	0.681892	0.199353	1.90372	18.5811	3.33925	68.593	103.601	117.073	136.996	182.5	274.089	463.354	621.951	1380.2	0.093535	0.148036
35	18KH9_64	833	464	0.557023	0.494006	9.2589	0.0344	9.01913	0.974103	29.0698	9.01912	0.1042	2.09348	218.03	9.01912	1699.4	2.09348	0.128298		18KH9_64	11.6878	26.2643	2.96336	9.14661	34.6622	10.4796	140.704	293.629	552.846	1009.16	1637.5	2226.72	3490.68	3910.57	1141.24	0.150059	0.0403083
35	18KH9_65	376	45.61	0.121303	1.4856	3.83279	0.1209	3.44451	0.898694	8.2713	3.44451	0.08916	1.68097	735.7	3.44451	1406.7	1.68097	0.522997		18KH9_65	0.0485232	1.58238	0.506466	4.02626	15.9459	2.20249	57.2864	104.432	138.618	154.762	208.75	304.453	474.534	581.301	1411.1	0.0728723	0.120721
35	18KH9_66	317.7	163.5	0.514636	1.21568	3.61434	0.09	3.19817	0.884855	11.1111	3.19817	0.09801	1.6838	555.54	3.19817	1585.8	1.6838	0.350322		18KH9_66	0.333333	12.4796	0.862069	4.52954	20.0676	17.4067	91.9598	159.834	269.512	426.74	681.25	1000	1577.64	1995.93	1048.54	0.405202	0.0582895
35	18KH9_67	562.1	24.4	0.0434086	0.690188	4.6931	0.0583	4.1302	0.880058	17.1527	4.1302	0.0859	2.2286	365.28	4.1302	1335.1	2.2286	0.273597		18KH9_67	0.0274262	2.20228	0.452586	1.40044	6.41892	5.1865	38.2412	122.161	288.211	461.538	703.125	955.466	1422.36	1682.93	1761.3	0.331038	0.0268857
35	18KH9_69	268.5	86	0.320298	2.26766	5.64638	0.1859	5.40852	0.957874	5.37924	5.40852	0.08851	1.62158	1099.1	5.40852	1392.7	1.62158	0.789186		18KH9_69	0.0147679	2.08809	1.00216	7.89934	31.2162	0.692718	75.3769	76.1773	70.3252	55.1282	51.1875	51.0121	58.7578	53.6585	1503.8	0.0142806	1.28284
35	18KH9_7	635	28.27	0.0445197	0.674658	4.97654	0.0563	4.68821	0.942063	17.762	4.68821	0.08695	1.6693	353.08	4.68821	1358.5	1.6693	0.259904		18KH9_7	-2.70042	1.28874	0.969828	1.2035	15.3378	3.0373	70.8543	200.554	312.195	408.425	487.5	607.287	919.255	1081.3	1402.86	0.0921346	0.077078
35	18KH9_70	223.5	99.1	0.4434	0.00792715	14.2601	0.000913	3.83345	0.268824	1095.29	3.83345	0.063	13.7352	5.88	3.83345	707	13.7352	0.00831683		18KH9_70	0.0616034	14.0457	3.11422	14.9234	28.7162	6.4476	47.8392	55.1247	71.5447	79.6703	93.75	129.15	164.596	199.187	1812.8	0.173957	0.290646
35	18KH9_71	505	91	0.180198	0.341596	7.73362	0.0255	7.42408	0.959975	39.2157	7.42408	0.0972	2.16608	162.32	7.42408	1570.2	2.16608	0.103375		18KH9_71	0.109705	4.323	1.05603	6.76149	21.9595	6.41208	60.804	105.54	152.033	219.963	318.75	437.247	608.696	776.423	1740.7	0.175478	0.0998923
35	18KH9_72	816.1	237.1	0.290528	1.17533	7.31681	0.0995	7.11564	0.972506	10.0503	7.11564	0.08571	1.70392	611.5	7.11564	1330.8	1.70392	0.459498		18KH9_72	59.0717	76.6721	17.2414	28.2276	40.5405	15.0977	128.643	265.928	483.74	877.289	1425	2384.62	3770.19	5182.93	1178.32	0.209061	0.0341212
35	18KH9_73	428.6	279.8	0.652823	0.0323663	8.43779	0.00358	7.88481	0.934464	279.33	7.88481	0.0656	3.00434	23.04	7.88481	792.7	3.00434	0.0290652		18KH9_73	0.135021	20.5546	3.46983	15.186	28.4459	3.62345	37.4372	42.9363	46.9919	44.3223	44	48.9879	52.6087	57.7236	2142.4	0.111035	0.711616
35	18KH9_77	157.7	168.7	1.06975	0.0100782	14.2117	0.001292	4.9068	0.345265	773.994	4.9068	0.0566	13.3378	8.32	4.9068	475	13.3378	0.0175158		18KH9_77	0.151899	15.4486	4.91379	19.6937	29.9324	4.56483	45.5276	60.1108	67.8862	80.7692	94.5625	112.551	146.584	163.821	2224.8	0.123656	0.310591
35	18KH9_78	153.9	145.3	0.94412	0.0273905	8.5948	0.00392	7.26162	0.844885	255.102	7.26162	0.0507	4.59777	25.22	7.26162	226.2	4.59777	0.111494		18KH9_78	0.130802	16.6884	3.60991	18.512	24.5946	4.2984	36.0302	37.9501	42.1138	37.7289	38.0625	38.9069	39.1925	33.7398	1802.5	0.144396	0.919311
35	18KH9_79	265.2	151.5	0.571267	0.372426	12.2386	0.0305	12.0253	0.982568	32.7869	12.0253	0.0886	2.27523	193.7	12.0253	1394.7	2.27523	0.138883		18KH9_79	0.092827	52.2023	1.88578	7.78993	37.9054	10.1243	121.106	222.992	464.228	829.67	1293.75	1991.9	2962.73	3617.89	1354.45	0.149429	0.0408763
35	18KH9_8	298.3	95.9	0.321488	0.0619706	12.0729	0.00465	11.4169	0.945658	215.054	11.4169	0.0967	3.92565	29.91	11.4169	1560.6	3.92565	0.0191657		18KH9_8	-13.0802	15.3018	2.07974	1.81619	15.8108	6.02131	62.3116	149.584	286.179	573.26	898.125	1218.62	1850.93	2052.85	1200.98	0.191836	0.033665
35	18KH9_80	468	79.8	0.170513	0.0778253	11.1027	0.00682	10.8048	0.973171	146.628	10.8048	0.0828	2.55456	43.82	10.8048	1263.6	2.55456	0.0346787		18KH9_80	1.07173	9.91843	1.44397	5.88621	21.4865	14.3872	89.9497	189.474	316.667	516.484	765.625	1149.8	1720.5	2060.98	1179.35	0.327261	0.0522813
35	18KH9_81	427.4	140.5	0.328732	0.387335	7.80924	0.0304	7.59354	0.972379	32.8947	7.59354	0.09245	1.82273	193.05	7.59354	1475.8	1.82273	0.13081		18KH9_81	0.0472574	16.0196	0.872845	5.99562	18.9865	3.58792	65.8291	157.895	302.033	538.462	834.375	1364.37	2167.7	2650.41	1339	0.101487	0.0303682
35	18KH9_82	657	31.9	0.048554	0.201854	6.70211	0.0184	6.40544	0.955734	54.3478	6.40544	0.0796	1.97196	117.54	6.40544	1186.2	1.97196	0.0990895		18KH9_82	0.295359	2.67537	0.603448	2.18818	8.31081	4.8135	51.7588	173.13	318.699	435.897	543.75	635.628	894.41	987.805	1493.5	0.232085	0.0578692
35	18KH9_83	393	46.81	0.119109	0.00479518	10.3649	0.000664	3.22386	0.311035	1506.02	3.22386	0.0524	9.8508	4.279	3.22386	302	9.8508	0.0141689		18KH9_83	0.303797	4.71452	1.08836	4.98906	19.7973	10.1243	75.8794	105.263	129.675	161.172	233.125	373.279	611.801	808.943	1699.5	0.261217	0.124026
35	18KH9_84	447	29.54	0.066085	0.3314	8.06395	0.0292	7.87749	0.976878	34.2466	7.87749	0.08235	1.72405	185.54	7.87749	1253	1.72405	0.148077		18KH9_84	-0.000312658	1.06199	0.344828	2.1663	11.6892	1.98934	56.5327	118.006	147.154	151.099	162.5	205.263	300.621	369.919	1402.86	0.0773869	0.188053
35	18KH9_85	697.8	91.1	0.130553	0.676171	5.28033	0.0582	5.02466	0.951582	17.1821	5.02466	0.0843	1.62315	364.67	5.02466	1298.6	1.62315	0.280818		18KH9_85	0.481013	6.21533	0.786638	4.31072	21.2838	7.26465	102.513	214.404	357.317	556.777	920	1550.61	2701.86	3134.15	1689.2	0.155526	0.0379414
35	18KH9_86	612	26.5	0.0433007	1.234	5.00293	0.1009	4.6692	0.933293	9.9108	4.6692	0.08874	1.79663	619.7	4.6692	1397.7	1.79663	0.443371		18KH9_86	0.0320675	1.14192	0.238147	0.984683	7.77027	6.64298	57.2864	159.003	360.163	598.901	925	1400.81	2080.75	2439.02	1430.67	0.314861	0.0275317
35	18KH9_87	464	183	0.394397	0.738825	8.76254	0.0662	8.62064	0.983807	15.1057	8.62064	0.08098	1.57053	413.2	8.62064	1220.1	1.57053	0.338661		18KH9_87	0.0147679	7.74878	2.84483	17.6586	33.2432	3.26821	52.7638	50.1385	51.3821	51.2821	48.9375	54.251	64.9689	66.2602	1977.6	0.078035	0.812139
35	18KH9_88	284.1	60.9	0.214361	0.148416	14.2241	0.011	13.829	0.97222	90.9091	13.829	0.0979	3.32942	70.52	13.829	1583.7	3.32942	0.0445286		18KH9_88	0.168776	2.62643	0.797414	4.44201	30.473	2.68206	73.8693	72.8532	54.878	36.9963	32.0625	30.2834	35.7143	41.8699	1339	0.05653	2.06834
35	18KH9_89	369	39.85	0.107995	0.367059	8.4229	0.0328	8.25376	0.97992	30.4878	8.25376	0.0812	1.67947	208.05	8.25376	1225.4	1.67947	0.169781		18KH9_89	0.0278481	1.87602	0.625	3.3698	20.6757	1.84725	64.3216	84.4875	72.3577	56.2271	41.875	44.5344	49.6894	53.252	1343.12	0.0506543	1.29447
35	18KH9_9	331.1	256.7	0.775294	0.906021	5.02072	0.0737	4.55776	0.907791	13.5685	4.55776	0.0892	2.1058	458.4	4.55776	1407.6	2.1058	0.325661		18KH9_9	-4.17722	41.7618	5.24784	5.62363	20.9459	10.444	63.8191	131.579	247.561	452.381	804.375	1206.48	2012.42	2475.61	1236	0.285656	0.0317126
35	18KH9_90	602	164	0.272425	0.568979	4.01938	0.048	3.55318	0.884011	20.8333	3.55318	0.08601	1.87893	302.23	3.55318	1337.5	1.87893	0.225966		18KH9_90	0.168776	7.8956	1.17457	6.01751	40.2703	5.59503	119.598	203.324	303.659	452.381	618.75	1004.05	1509.32	1780.49	1287.5	0.080621	0.0792398
35	18KH9_91	275.5	99.1	0.35971	2.71665	3.65391	0.2091	3.28351	0.898628	4.7824	3.28351	0.09427	1.60302	1224	3.28351	1512.7	1.60302	0.809149		18KH9_91	6.4557	6.96574	4.53664	15.6674	53.5811	3.32149	104.02	98.0609	78.8618	59.1575	54.5	47.3684	53.7267	46.3415	1215.4	0.0444907	1.9361
15	18KH9r_69	424	159.8	0.376887	0.936391	8.25652	0.0745	7.98924	0.967627	13.4228	7.98924	0.0912	2.08381	463.2	7.98924	1449.9	2.08381	0.31947		18KH9r_69	-0.0109705	4.14356	3.23276	15.7549	77.027	-1.06572	47.2362	58.1717	50.4065	42.4908	44.375	54.6559	75.7764	60.5691	1472.9	-0.0176679	0.623363
15	18KH9r_72	251	60.7	0.241833	1.15369	13.7653	0.097	13.598	0.987842	10.3093	13.598	0.0863	2.13999	596.8	13.598	1344	2.13999	0.444048		18KH9r_72	0	2.15334	1.19612	5.09847	64.1892	2.6643	82.9146	78.1163	48.7805	24.9084	20.375	12.9555	24.2236	18.2927	1133	0.0365205	3.42288
15	18KH9r_73	161.9	45.8	0.282891	2.51631	9.56441	0.209	9.37735	0.980442	4.78469	9.37735	0.08736	1.88236	1223.5	9.37735	1367.6	1.88236	0.894633		18KH9r_73	0	1.92496	0.721983	4.20131	31.7568	7.46004	40.7035	96.1219	117.48	121.429	113.75	109.312	185.093	185.366	1308.1	0.207495	0.219908
15	18KH9r_74	239.7	94.6	0.39466	0.0933855	14.9248	0.0077	13.1891	0.883702	129.87	13.1891	0.088	6.98556	49.45	13.1891	1381.6	6.98556	0.0357918		18KH9r_74	0	1.56607	1.04526	7.52735	81.7568	3.19716	73.3668	88.0886	66.2602	60.8059	72.5	74.4939	75.7764	82.9268	1472.9	0.0412812	0.968202
15	18KH9r_76	210.2	88.3	0.420076	1.63992	8.03494	0.134	7.80908	0.97189	7.46269	7.80908	0.0888	1.89171	810.6	7.80908	1399	1.89171	0.579414		18KH9r_76	0	2.26754	0.915948	7.43982	65.5405	2.30906	60.804	66.482	52.8455	33.1502	31.25	30.7692	19.2547	21.9512	1199.95	0.0365775	3.15789
15	18KH9r_77	407	93.9	0.230713	0.31917	9.12735	0.0252	8.64491	0.947144	39.6825	8.64491	0.0919	2.92814	160.44	8.64491	1464.5	2.92814	0.109553		18KH9r_77	0.0113924	2.67537	1.31466	12.6915	64.8649	3.19716	50.2513	56.5097	69.5122	55.6777	61.25	77.3279	72.0497	47.561	1246.3	0.0559997	0.697453
15	18KH9r_78	321	49.5	0.154206	0.0473056	12.2784	0.00331	9.35072	0.761561	302.115	9.35072	0.1037	7.95751	21.3	9.35072	1690.5	7.95751	0.0125998		18KH9r_78	-0.0202532	2.31648	0.851293	2.58206	64.1892	4.26288	114.07	116.343	66.2602	30.5861	27.5	28.7449	44.7205	36.5854	1215.4	0.0498179	2.55074
15	18KH9r_84	294	222	0.755102	2.46001	4.4474	0.2176	4.02968	0.906075	4.59559	4.02968	0.08203	1.88177	1269.2	4.02968	1245.4	1.88177	1.01911		18KH9r_84	0	7.09625	1.77802	9.40919	50	1.15453	31.1558	52.3546	45.122	46.1538	42.5	40.8907	49.6894	52.8455	1339	0.0292517	0.62701
15	18KH9r_88	201.2	115.4	0.573559	0.342503	10.6082	0.0274	9.76382	0.920405	36.4963	9.76381	0.0907	4.14745	174.26	9.76381	1439.5	4.14745	0.121056		18KH9r_88	-0.0109705	4.38825	0.452586	6.60832	40.5405	1.24334	57.7889	52.9086	62.6016	38.4615	35.625	43.7247	54.6584	34.5528	1297.8	0.0256875	1.05728
15	18KH9r_89	218.3	186	0.852038	2.82872	6.31168	0.232	6.05711	0.959668	4.31034	6.05711	0.08847	1.77445	1345	6.05711	1391.8	1.77445	0.966374		18KH9r_89	0	2.52855	2.26293	9.84683	39.8649	0	36.6834	40.1662	46.3415	31.5018	41.875	46.5587	41.6149	35.7724	1472.9	0	0.881497
15	18KH9r_92	304	104.6	0.344079	0.157952	12.7792	0.0151	12.1404	0.95001	66.2252	12.1404	0.0759	3.98994	96.61	12.1404	1091.5	3.98994	0.0885112		18KH9r_92	0	11.8597	0.603448	7.43982	57.4324	3.19716	65.8291	78.1163	55.6911	42.8571	28.5	36.4372	39.7516	39.0244	1380.2	0.0519968	1.65601
35	286_1	292.9	53.5	0.182656	0.2379	8.52535	0.0226	8.29005	0.9724	44.2478	8.29005	0.07638	1.98913	144.07	8.29005	1104.1	1.98913	0.130486		286_1	0.0405063	15.7586	3.65302	15.4923	23.3108	5.15098	40.402	46.8144	51.626	58.7912	60.1875	69.6356	81.9876	83.3333	1545	0.167845	0.492782
35	286_10	808	95.2	0.117822	0.157877	4.99765	0.01584	4.70415	0.941272	63.1313	4.70415	0.07232	1.68745	101.31	4.70415	994	1.68745	0.101922		286_10	0.0320675	1.14192	0.238147	0.984683	7.77027	6.64298	57.2864	159.003	360.163	598.901	925	1400.81	2080.75	2439.02	1430.67	0.314861	0.0275317
35	286_100	514	27.62	0.0537354	2.12876	3.51778	0.1687	3.13748	0.891894	5.92768	3.13748	0.09156	1.5909	1004.9	3.13748	1457.4	1.5909	0.689516		286_100	0.548523	30.9951	0.872845	3.50109	18.1757	2.55773	77.3869	151.801	331.301	668.498	1362.5	2417	3720.5	4560.98	1936.4	0.0681985	0.0208002
35	286_101	429	69.5	0.162005	1.30644	4.1111	0.1168	3.77749	0.918853	8.56164	3.77749	0.08116	1.62223	712.1	3.77749	1224.4	1.62223	0.581591		286_101	0.0886076	2.969	3.0819	9.7593	49.8649	1.70515	114.573	94.1828	63.4146	34.4322	26.9375	24.8178	24.5963	22.8049	1296.77	0.0225592	4.65814
35	286_102	546.5	65.5	0.119854	0.375433	7.95581	0.0322	6.62335	0.832517	31.0559	6.62335	0.0846	4.40751	204.3	6.62335	1305.5	4.40751	0.156492		286_102	0.0506329	5.79119	1.45474	5.62363	27.8378	8.20604	131.658	228.532	457.724	749.084	1256.25	1995.95	2881.99	3313.01	1145.36	0.135548	0.0456832
35	286_103	331.4	152.8	0.461074	0.0150759	5.58176	0.002022	2.73702	0.490352	494.56	2.73702	0.0541	4.86464	13.02	2.73702	374.2	4.86464	0.0347942		286_103	0.0506329	2.75693	3.36207	9.80306	47.7027	1.33215	124.121	129.363	156.911	171.795	241.875	304.049	360.248	373.171	1442	0.0173125	0.344542
35	286_105	552.6	35.83	0.0648389	2.32941	3.65184	0.1945	3.15483	0.8639	5.14139	3.15483	0.0869	1.8393	1145.7	3.15483	1357.4	1.8393	0.84404		286_105	0.362869	8.79282	1.88578	6.45514	32.2297	2.62877	77.8894	99.723	144.715	214.652	385	659.919	1037.27	1134.15	1493.5	0.0524669	0.075091
35	286_107	618.1	90.9	0.147064	1.08753	5.0257	0.0911	4.76332	0.947793	10.977	4.76332	0.08662	1.60263	562	4.76332	1351.2	1.60263	0.415927		286_107	0.007173	4.06199	2.88793	7.3523	20.4054	2.06039	36.5327	37.9501	40.2439	55.3114	98.125	193.927	359.006	491.87	1565.6	0.0754634	0.101761
35	286_108	676	235	0.347633	1.19543	3.76253	0.1	3.39706	0.902865	10	3.39706	0.08674	1.6176	614.41	3.39706	1353.9	1.6176	0.453808		286_108	-0.0004414	4.60033	2.83405	9.67177	21.6892	1.13677	47.6884	40.1662	31.748	20.8791	18.1875	16.2348	15.9627	14.9187	1411.1	0.0353463	2.98749
35	286_109	723	459	0.634855	0.960571	6.08827	0.0813	5.8805	0.965874	12.3001	5.88051	0.08573	1.57694	503.9	5.88051	1331.2	1.57694	0.378531		286_109	0.198312	6.34584	1.89655	5.99562	25.7432	4.42274	134.673	216.066	406.098	575.092	987.5	1502.02	2341.61	2569.11	1229.82	0.0751136	0.057513
35	286_11	219.9	51.2	0.232833	0.829857	5.01449	0.068	4.71646	0.940566	14.7059	4.71646	0.08855	1.70297	424.1	4.71646	1393.6	1.70297	0.30432		286_11	0.0147679	7.74878	2.84483	17.6586	33.2432	3.26821	52.7638	50.1385	51.3821	51.2821	48.9375	54.251	64.9689	66.2602	1977.6	0.078035	0.812139
35	286_110	106.6	33.77	0.316792	0.0218924	9.68623	0.002378	3.29175	0.339839	420.521	3.29175	0.0668	9.10974	15.31	3.29175	830.6	9.10974	0.0184325		286_110	1.36709	2.77325	2.98491	5.99562	17.027	1.10124	49.8492	61.2188	87.3984	111.722	183.75	295.547	486.335	552.846	1145.36	0.0377994	0.1025
35	286_111	225.2	64.5	0.286412	0.95727	5.26092	0.0822	4.94677	0.940286	12.1654	4.94677	0.0845	1.79073	509.2	4.94677	1303.2	1.79073	0.390731		286_111	0.0421941	0.641109	0.355603	1.48796	26.0135	2.18472	123.618	162.881	134.553	111.538	108.125	128.745	197.516	243.902	1648	0.0385262	0.625865
35	286_112	153.7	83.1	0.540664	0.805924	4.8851	0.0672	4.50106	0.921385	14.881	4.50106	0.08702	1.8986	419.26	4.50106	1360.1	1.8986	0.308257		286_112	0.945148	13.3116	4.54741	7.15536	34.7297	2.06039	134.673	238.227	427.236	743.59	1137.5	1603.24	2434.78	2821.14	1380.2	0.0301271	0.0553123
35	286_113	286.8	49.43	0.17235	0.294241	6.43288	0.028	6.15979	0.957549	35.7143	6.15979	0.07625	1.85442	178.02	6.15979	1100.7	1.85442	0.161733		286_113	0.0185654	1.22349	0.765086	1.88184	23.3784	1.33215	64.2714	61.2188	39.0244	27.4725	21.875	36.4372	39.1304	53.252	1617.1	0.0343666	1.64249
35	286_114	252	26.63	0.105675	0.253472	8.99163	0.0203	8.68449	0.965841	49.2611	8.68449	0.0906	2.33006	129.55	8.68449	1437.4	2.33006	0.090128		286_114	0.232068	3.76835	6.70259	11.5755	37.2297	0.79929	44.2211	41.2742	38.9024	36.9963	31.3125	31.2551	36.7081	33.0081	1886.96	0.019699	1.20467
35	286_115	318	26.7	0.0839623	2.64673	5.47845	0.217	5.15038	0.940115	4.6083	5.15038	0.0885	1.86737	1266	5.15038	1392.5	1.86737	0.909156		286_115	0.0759494	6.18271	5.47414	11.5098	74.527	7.42451	82.9146	67.59	55.8943	54.7619	56.875	56.2753	62.795	52.8455	1298.83	0.0944486	1.3204
35	286_116	257.9	93.2	0.36138	1.85297	4.32795	0.151	3.97747	0.919018	6.62252	3.97747	0.08904	1.70614	906.6	3.97747	1404.2	1.70614	0.645635		286_116	0.0189873	4.82871	2.5	5.53611	35.6757	2.62877	67.8392	74.2382	71.1382	64.4689	56.375	59.919	66.3354	64.2276	1833.4	0.0534351	1.02267
35	286_117	419	12.11	0.0289021	1.66409	5.251	0.1389	4.95748	0.944102	7.19942	4.95748	0.08693	1.73101	838.4	4.95748	1358.1	1.73101	0.617333		286_117	0.253165	5.38336	2.40302	5.16411	23.0405	3.94316	52.7638	87.8116	159.35	282.601	486.25	894.737	1559.01	1878.05	1627.4	0.113092	0.0338445
35	286_119	707	78.5	0.111033	2.54786	3.56219	0.2088	3.15195	0.884833	4.78927	3.15195	0.08854	1.65965	1222.4	3.15195	1393.4	1.65965	0.877279		286_119	-0.0004359	0.941272	0.883621	1.66302	21.7568	1.90053	104.523	130.194	94.3089	60.8059	39.625	30.9717	35.1553	34.9593	1658.3	0.0398541	2.97317
35	286_12	348.7	33	0.0946372	0.329074	5.87288	0.0277	5.55288	0.945513	36.1011	5.55288	0.0862	1.91212	176.14	5.55288	1341.8	1.91212	0.131271		286_12	0.168776	2.62643	0.797414	4.44201	30.473	2.68206	73.8693	72.8532	54.878	36.9963	32.0625	30.2834	35.7143	41.8699	1339	0.05653	2.06834
35	286_120	331.3	53.9	0.162692	0.645154	4.85036	0.0498	4.45491	0.918469	20.0803	4.45491	0.094	1.91828	313.29	4.45491	1507.3	1.91828	0.207848		286_120	1.13924	12.969	1.9181	2.86652	17.2973	8.01066	67.3367	147.922	310.163	576.923	1051.88	1878.54	3304.35	4081.3	1555.3	0.234722	0.0203782
35	286_121	332.8	32.84	0.0986779	1.91697	4.9784	0.1579	4.71549	0.947189	6.33312	4.71549	0.08809	1.59646	945.1	4.71549	1383.6	1.59646	0.683073		286_121	0.151899	3.39315	4.76293	8.7965	25.7432	1.47425	39.196	49.3075	62.1951	75.2747	98.125	144.939	213.043	247.967	1923.01	0.0464106	0.183981
35	286_122	344.5	38.28	0.111118	0.200648	5.63706	0.01881	5.07052	0.899499	53.1632	5.07052	0.0774	2.46296	120.13	5.07052	1130.6	2.46296	0.106253		286_122	4.05063	3.42577	4.63362	4.74836	26.6892	0.941385	75.8794	80.8864	60.1626	46.1538	39.375	35.6275	40.3727	48.7805	1606.8	0.0209188	1.87947
35	286_124	214	94.6	0.442056	0.0156523	7.47738	0.001996	3.36401	0.449892	501.002	3.36401	0.0569	6.67792	12.85	3.36401	486.7	6.67792	0.0264023		286_124	0.350211	13.8662	1.875	2.97593	20.473	5.27531	69.3467	115.512	221.138	401.099	714.375	1259.11	2236.02	2971.54	1596.5	0.140005	0.0310134
35	286_125	428	64.5	0.150701	0.788856	5.63928	0.0595	3.93536	0.697847	16.8067	3.93536	0.0962	4.03912	372.58	3.93536	1550.8	4.03912	0.24025		286_125	2.40506	3.71941	3.44828	4.52954	22.9054	6.25222	76.8844	136.011	275.203	554.945	1050	1797.57	3254.66	3926.83	1596.5	0.148986	0.0236229
35	286_126	371.6	36	0.0968784	0.0368305	7.67761	0.00408	7.00594	0.912517	245.098	7.00594	0.0655	3.14045	26.25	7.00594	789.5	3.14045	0.0332489		286_126	0.14346	6.99837	4.20259	6.98031	27.973	2.50444	37.6884	40.4432	40.2033	43.4066	40.6875	36.8421	50.3106	50.4065	1596.5	0.0771325	0.749116
35	286_127	412.8	18	0.0436047	1.93806	5.04505	0.157	4.79188	0.949819	6.36943	4.79188	0.08957	1.5781	940.1	4.79188	1415.5	1.5781	0.664147		286_127	0.0362869	9.05383	1.44397	4.74836	26.4865	1.88277	61.3065	94.1828	173.577	327.839	549.375	834.008	1217.39	1500	1369.9	0.0467231	0.0503589
35	286_128	410	26.2	0.0639024	1.66995	5.94159	0.1376	5.71574	0.961989	7.26744	5.71574	0.08806	1.62259	831.1	5.71574	1382.9	1.62259	0.600983		286_128	0.0590717	1.9739	0.797414	1.72867	22.2973	2.20249	117.588	175.9	163.415	134.615	133.75	171.255	251.553	319.919	1606.8	0.0430136	0.467448
35	286_129	441	45.6	0.103401	2.77718	3.74003	0.2241	3.39624	0.908078	4.46229	3.39624	0.08992	1.56632	1303.5	3.39624	1423	1.56632	0.916022		286_129	0.21097	13.4747	1.45474	4.61707	31.1486	12.9663	93.9698	158.726	289.837	509.158	850	1417	2378.88	3077.24	1740.7	0.239663	0.0395017
35	286_13	144	69.7	0.484028	4.3454	2.88852	0.308	2.39893	0.830507	3.24675	2.39893	0.10237	1.60893	1730.9	2.39893	1666.7	1.60893	1.03852		286_13	0.0278481	1.87602	0.625	3.3698	20.6757	1.84725	64.3216	84.4875	72.3577	56.2271	41.875	44.5344	49.6894	53.252	1343.12	0.0506543	1.29447
35	286_130	506.3	22.86	0.0451511	0.737406	6.17296	0.0602	5.94469	0.963021	16.6113	5.94469	0.08888	1.66316	376.8	5.94469	1400.7	1.66316	0.269008		286_130	0.548523	1.25612	1.54095	1.9256	22.6351	0.994671	76.8844	89.7507	97.9675	125.641	166.25	263.563	444.099	556.911	1648	0.0238434	0.173124
35	286_131	448.1	32.3	0.0720821	2.10182	3.48042	0.1718	3.11142	0.89398	5.82072	3.11142	0.08877	1.5596	1022	3.11142	1398.3	1.5596	0.730888		286_131	0.0189873	2.61011	0.603448	3.08534	23.1081	1.66963	56.7337	67.313	79.6748	111.722	158.125	218.623	347.826	434.959	1411.1	0.0461123	0.163109
35	286_132	582	90.6	0.15567	2.00585	3.4265	0.1595	3.05207	0.890723	6.26959	3.05207	0.09125	1.5575	954	3.05207	1451	1.5575	0.657478		286_132	0.0101266	4.89396	1.79957	7.593	34.3243	1.66963	64.3719	54.8476	44.7154	39.1941	31.4375	30.8502	34.5342	38.2114	1312.22	0.0355198	1.86401
35	286_133	422	48.23	0.114289	0.141567	7.35542	0.01341	7.02407	0.954952	74.5712	7.02407	0.0766	2.18279	85.87	7.02407	1109.9	2.18279	0.0773673		286_133	0.0438819	7.27569	3.29741	11.663	37.8378	1.43872	49.397	39.8892	32.2358	28.2051	25.375	29.3927	45.4037	42.7642	1730.4	0.0332785	1.08795
35	286_134	343.1	30.8	0.0897697	1.99045	4.51883	0.1728	4.21326	0.932378	5.78704	4.21326	0.08358	1.63349	1027.5	4.21326	1281.9	1.63349	0.801545		286_134	0.383966	5.56281	4.0194	14.8359	121.622	17.4067	116.08	106.648	93.0894	92.4908	107.5	148.178	193.789	268.293	1349.3	0.146498	0.599005
35	286_135	378	104	0.275132	2.09585	5.01192	0.168	4.70729	0.939219	5.95238	4.70729	0.09052	1.72069	1001.1	4.70729	1435.7	1.72069	0.697291		286_135	0.0105485	3.83361	1.5625	8.03063	35.9459	3.33925	62.3116	70.6371	83.3333	131.319	232.5	349.798	658.385	987.805	1493.5	0.070557	0.094643
35	286_136	448	66.5	0.148438	0.822817	4.35246	0.0667	4.02108	0.923864	14.9925	4.02109	0.08951	1.66578	416.24	4.02109	1414.2	1.66578	0.294329		286_136	11.3924	15.1713	14.5474	14.6608	29.7297	2.30906	104.02	114.958	75.6098	48.7179	34.875	29.1498	30.1242	30.6098	1545	0.0415222	3.45304
35	286_137	277.8	50.55	0.181965	2.07764	4.09158	0.1699	3.78161	0.924242	5.88582	3.78161	0.08873	1.5622	1011.6	3.78161	1397.5	1.5622	0.723864		286_137	-0.0002207	5.87276	0.905172	3.6105	23.9189	3.51687	90.4523	175.069	225.203	320.513	408.75	485.83	637.267	837.398	1385.35	0.0756095	0.141938
35	286_138	406.7	25.1	0.0617163	1.5167	3.74063	0.1256	3.37369	0.901905	7.96178	3.37369	0.08762	1.61571	762.7	3.37369	1373.3	1.61571	0.555378		286_138	0.160338	6.16639	1.45474	7.04595	25.1351	3.74778	51.1558	77.5623	153.252	309.524	556.25	902.834	1633.54	2166.67	1751	0.104517	0.0313159
35	286_139	558.4	147.5	0.264148	3.50751	3.11833	0.2663	2.68709	0.861708	3.75516	2.68709	0.09557	1.58226	1522	2.68709	1538.5	1.58226	0.989275		286_139	0.0362869	4.40457	2.15517	8.53392	25.8784	1.58082	41.809	46.2604	45.2033	53.663	52.0625	54.6559	56.9565	52.8455	1781.9	0.0480594	0.734052
35	286_14	391.1	40.32	0.103094	2.77893	3.10244	0.2273	2.67396	0.861888	4.39947	2.67396	0.08871	1.57324	1320.3	2.67396	1397	1.57324	0.945097		286_14	0.168776	7.8956	1.17457	6.01751	40.2703	5.59503	119.598	203.324	303.659	452.381	618.75	1004.05	1509.32	1780.49	1287.5	0.080621	0.0792398
35	286_140	409.2	22.23	0.0543255	1.22627	5.34413	0.1051	5.02873	0.940983	9.51475	5.02873	0.08466	1.80875	644.2	5.02873	1306.9	1.80875	0.492922		286_140	0.113924	3.73573	2.48922	8.66521	21.5541	2.94849	34.6734	29.6399	21.2195	13.5531	11.125	10.6073	10.3727	16.2195	1408.01	0.107854	3.34276
35	286_15	347.2	25	0.0720046	0.0124318	7.30922	0.001826	2.54748	0.34853	547.645	2.54748	0.0494	6.85091	11.76	2.54748	165.8	6.85091	0.0709288		286_15	6.4557	6.96574	4.53664	15.6674	53.5811	3.32149	104.02	98.0609	78.8618	59.1575	54.5	47.3684	53.7267	46.3415	1215.4	0.0444907	1.9361
35	286_16	990	55.9	0.0564646	1.92545	3.7973	0.1557	3.44819	0.908063	6.42261	3.44819	0.08973	1.59044	932.8	3.44819	1418.9	1.59044	0.657411		286_16	0.548523	5.0571	0.484914	6.12691	19.5946	1.08348	15.0754	34.349	63.8211	102.564	138.125	238.866	472.05	463.415	219.39	0.0630404	0.031936
35	286_17	391.1	91	0.232677	2.70304	3.28189	0.2156	2.89767	0.882927	4.63822	2.89767	0.09097	1.54088	1258.6	2.89767	1445.1	1.54088	0.870943		286_17	0.0379747	0.978793	0.431034	2.12254	26.0135	1.2611	61.3065	53.4626	31.5447	16.8498	10.1875	10.8097	9.44099	11.2195	1678.9	0.0315789	6.49365
35	286_18	245.3	39.17	0.159682	1.41849	4.15987	0.125	3.81203	0.916382	8	3.81203	0.08234	1.66522	759.3	3.81203	1252.7	1.66522	0.606131		286_18	0.637131	10.6688	4.53664	19.2341	66.8919	7.95737	95.4774	97.2299	88.6179	84.6154	92.5	88.664	97.5155	81.7073	1606.8	0.0995709	0.979099
35	286_19	215.6	138.5	0.642393	0.0249063	10.0451	0.002063	2.57748	0.256591	484.731	2.57748	0.0876	9.70876	13.29	2.57748	1372.9	9.70876	0.00968024		286_19	0.43038	9.64111	2.72629	10.1532	34.1216	6.41208	68.3417	67.867	69.5122	69.9634	65.375	69.2308	82.9193	71.9512	1380.2	0.132783	0.824196
35	286_2	131	56.05	0.427863	0.016637	11.6412	0.002215	2.8163	0.241925	451.467	2.8163	0.0545	11.2954	14.26	2.8163	391	11.2954	0.0364706		286_2	0.151899	15.4486	4.91379	19.6937	29.9324	4.56483	45.5276	60.1108	67.8862	80.7692	94.5625	112.551	146.584	163.821	2224.8	0.123656	0.310591
35	286_20	356.2	19.48	0.0546884	1.18379	4.04231	0.1025	3.35244	0.829337	9.7561	3.35244	0.0838	2.25864	629	3.35244	1287	2.25864	0.488733		286_20	3.67089	2.98532	1.46552	6.10503	37.4324	1.65187	66.8342	60.1108	54.065	48.7179	44.0625	41.7004	41.8634	32.6016	1936.4	0.0330256	1.59648
35	286_3	337.2	35.69	0.105842	2.87913	5.12675	0.233	4.86929	0.94978	4.29185	4.86929	0.08966	1.60425	1350.2	4.86929	1417.4	1.60425	0.952589		286_3	0.130802	16.6884	3.60991	18.512	24.5946	4.2984	36.0302	37.9501	42.1138	37.7289	38.0625	38.9069	39.1925	33.7398	1802.5	0.144396	0.919311
35	286_4	452	29.07	0.0643142	1.86812	4.38946	0.1493	4.0627	0.925558	6.69792	4.0627	0.09079	1.66187	897	4.0627	1441.3	1.66187	0.622355		286_4	1.07173	9.91843	1.44397	5.88621	21.4865	14.3872	89.9497	189.474	316.667	516.484	765.625	1149.8	1720.5	2060.98	1179.35	0.327261	0.0522813
35	286_56	321.1	28.6	0.0890688	0.595037	6.12484	0.0494	5.74376	0.937782	20.2429	5.74377	0.0874	2.12669	310.84	5.74377	1368.5	2.12669	0.227139		286_56	-0.0008354	2.03915	0.233836	1.53173	13.7838	3.35702	65.3266	112.742	167.48	206.96	271.875	369.636	546.584	597.561	1730.4	0.111873	0.119518
35	286_57	339.6	23.73	0.0698763	0.583	6.02061	0.0492	5.76338	0.957274	20.3252	5.76338	0.08598	1.74105	309.61	5.76338	1336.9	1.74105	0.231588		286_57	0.443038	4.97553	2.21983	10.8315	61.9595	5.95027	75.8794	69.8061	52.8455	35.5311	28.125	27.0445	27.6398	22.4797	2173.3	0.0867802	2.7453
35	286_58	357.8	20.83	0.0582169	0.724001	4.29251	0.0643	3.50428	0.816371	15.5521	3.50428	0.0817	2.47905	401.72	3.50428	1237.5	2.47905	0.324622		286_58	0.105485	4.53507	1.02371	4.26696	21.7568	2.07815	60.804	56.7867	43.4959	41.2088	35	42.915	85.0932	85.3659	1555.3	0.0571366	0.714558
35	286_59	344.4	26.71	0.0775552	2.1737	4.55619	0.1797	4.28646	0.940798	5.56483	4.28646	0.08777	1.5444	1065.3	4.28646	1376.6	1.5444	0.773863		286_59	0.172996	6.88418	1.43319	6.30197	21.8919	3.5524	38.8442	42.6593	47.8049	48.5348	51.75	51.417	60.7453	56.9106	1405.95	0.121819	0.63946
35	286_6	203.5	85.7	0.42113	0.0237885	7.60255	0.002697	4.05288	0.533095	370.782	4.05288	0.064	6.43218	17.36	4.05288	740.7	6.43218	0.0234373		286_6	0.295359	2.67537	0.603448	2.18818	8.31081	4.8135	51.7588	173.13	318.699	435.897	543.75	635.628	894.41	987.805	1493.5	0.232085	0.0578692
35	286_61	344.7	17.05	0.0494633	1.25194	5.50153	0.1039	5.24703	0.953741	9.62464	5.24703	0.08743	1.65392	637.2	5.24703	1369.1	1.65392	0.465415		286_61	0.405063	14.1925	4.81681	17.4617	63.3108	9.30728	101.005	91.4127	88.2114	82.967	87.5	88.2591	99.3789	92.6829	1709.8	0.116389	1.01636
35	286_62	313.2	24.23	0.0773627	1.86425	4.1696	0.1463	3.73212	0.895078	6.83527	3.73212	0.09246	1.85927	880.2	3.73212	1476	1.85927	0.596341		286_62	1.68776	3.18108	1.55172	5.64551	36.0811	0.497336	70.3518	60.1108	41.7073	27.1062	22.8125	20.3239	21.5528	17.3984	1215.4	0.00987126	3.26416
35	286_63	196.3	145.5	0.741212	0.0344618	5.28323	0.004903	2.64459	0.500564	203.957	2.64459	0.051	4.57369	31.53	2.64459	239.8	4.57369	0.131485		286_63	0.181435	10.9951	2.33836	8.59956	27.973	4.8135	55.2764	54.8476	54.4715	52.7473	50.375	53.0364	63.1056	47.9675	1424.49	0.122411	0.875935
35	286_65	499	59.9	0.12004	0.326642	5.49567	0.0274	4.94677	0.900122	36.4963	4.94677	0.0865	2.39412	174.26	4.94677	1348.5	2.39412	0.129225		286_65	0.28692	2.61011	2.34914	10.6127	77.7027	4.2984	160.302	162.05	146.341	130.403	127.5	126.721	139.752	123.171	2245.4	0.0385141	1.14705
35	286_66	157.8	74.65	0.473067	0.0387572	11.5365	0.0043	9.35685	0.811065	232.558	9.35685	0.0654	6.74833	27.66	9.35685	786.3	6.74833	0.0351774		286_66	0.485232	6.5416	2.02586	7.00219	33.5811	5.64831	56.7839	60.1108	61.3821	60.6227	65	81.7814	106.211	122.764	1368.87	0.129348	0.534632
35	286_67	469	35.5	0.075693	0.0120127	7.20068	0.001673	3.06923	0.426241	597.729	3.06923	0.0521	6.5138	10.78	3.06923	288.8	6.5138	0.0373269		286_67	-7.59494	9.20065	3.06034	10.2188	34.1892	3.96092	47.5377	47.0914	45.122	36.63	36.1875	34.413	41.0559	31.3008	1483.2	0.0982501	1.15788
35	286_69	756	240	0.31746	1.84696	3.27918	0.1451	2.71746	0.828703	6.8918	2.71746	0.09236	1.83532	873.4	2.71746	1473.9	1.83532	0.592578		286_69	-0.0003127	1.06199	0.344828	2.1663	11.6892	1.98934	56.5327	118.006	147.154	151.099	162.5	205.263	300.621	369.919	1402.86	0.0773869	0.188053
35	286_7	150.2	83.93	0.558788	0.0216028	7.07057	0.002496	3.32693	0.470532	400.641	3.32693	0.0628	6.23895	16.07	3.32693	700.5	6.23895	0.0229408		286_7	-12.2363	6.0522	1.68103	6.12691	28.5811	2.43339	43.7186	44.0443	47.9675	49.4505	52.75	57.8947	67.0186	58.5366	1823.1	0.0688398	0.652335
35	286_70	220.8	58.26	0.263859	0.383206	7.18165	0.0348	6.72723	0.936725	28.7356	6.72723	0.0799	2.51404	220.52	6.72723	1193.6	2.51404	0.184752		286_70	-10.5485	1.79445	1.92888	9.19037	57.6351	1.84725	107.538	100	95.5285	95.4212	83.5625	85.0202	96.8944	84.9593	1895.2	0.0234639	1.10984
35	286_71	407.2	27.1	0.0665521	1.24635	4.13365	0.1016	3.74283	0.905453	9.84252	3.74283	0.08901	1.75451	623.8	3.74283	1403.5	1.75451	0.44446		286_71	-22.7848	3.86623	1.02371	3.87309	15.8784	4.15631	50.7538	91.9668	167.48	264.835	422.5	777.328	1329.19	1516.26	1213.34	0.14641	0.0381839
35	286_73	413	70.7	0.171186	1.23236	3.7541	0.093	3.37732	0.899637	10.7527	3.37732	0.09615	1.63919	573.26	3.37732	1549.9	1.63919	0.369869		286_73	-168.776	4.51876	4.29957	11.9694	36.2162	1.72291	53.2663	56.5097	73.5772	86.2637	100.625	125.506	155.901	139.837	1606.8	0.039227	0.341668
35	286_74	617	42.5	0.0688817	1.38169	3.77848	0.1135	3.43778	0.909832	8.81057	3.43778	0.08833	1.56798	693	3.43778	1388.8	1.56798	0.498992		286_74	-4.00844	6.50897	2.84483	15.5361	50.8108	2.02487	68.8442	52.0776	49.0244	44.5055	39.0625	37.4089	45.7143	34.9593	1751	0.0342361	1.50597
35	286_75	150.7	4.8	0.0318514	0.846145	5.41361	0.0864	5.06608	0.935804	11.5741	5.06608	0.07106	1.90841	534.2	5.06608	958.2	1.90841	0.557504		286_75	-3.96624	5.88907	1.54095	6.21444	24.4595	2.1492	34.9246	32.687	37.2358	32.6007	30.5	28.0567	39.441	34.9593	1555.3	0.0735339	0.88549
35	286_76	398.8	58.57	0.146866	1.65091	3.58723	0.1494	3.18888	0.888953	6.69344	3.18888	0.08018	1.64295	897.6	3.18888	1200.5	1.64295	0.747688		286_76	-4.9789	4.60033	0.818966	2.51641	15.2027	1.98934	55.7789	111.634	256.911	521.978	987.5	1785.43	3142.86	3813.01	1668.6	0.0683147	0.0177478
35	286_77	263.8	70.7	0.268006	0.0385449	10.1578	0.0038	9.23826	0.909473	263.158	9.23826	0.0736	4.22323	24.45	9.23826	1029.6	4.22323	0.0237471		286_77	-4.2616	10.9462	2.98491	10.547	35.7432	5.82593	48.3417	48.1994	50.5691	52.7473	54.125	53.4413	68.8199	54.4715	1545	0.140155	0.702438
35	286_78	96.2	141.2	1.46778	0.0163342	10.8984	0.002094	3.38478	0.310575	477.555	3.38478	0.0566	10.3595	13.48	3.38478	475	10.3595	0.0283789		286_78	-21.097	24.4698	0.905172	3.08534	21.6216	7.06927	81.407	135.734	286.179	538.462	901.25	1392.71	2453.42	2873.98	1356.51	0.1685	0.0331811
35	286_79	173.6	63.8	0.367512	0.0164274	7.84498	0.001892	3.23346	0.41217	528.541	3.23346	0.063	7.14762	12.19	3.23346	707.3	7.14762	0.0172346		286_79	-8.01688	10.1468	2.86638	7.87746	33.1081	4.74245	46.7337	47.3684	55.6911	55.1282	55.1875	55.8704	75.7143	66.6667	1524.4	0.120565	0.617237
35	286_80	505	95.8	0.189703	0.700218	6.2878	0.0536	6.05116	0.962366	18.6567	6.05116	0.09479	1.70876	336.59	6.05116	1523.1	1.70876	0.22099		286_80	-14.346	1.06852	0.463362	1.90372	21.7568	7.44227	199.497	642.659	1491.87	2135.53	2843.75	3534.41	4906.83	4715.45	1812.8	0.112964	0.0406571
35	286_81	640	700	1.09375	0.602194	4.64716	0.0516	4.34147	0.93422	19.3798	4.34147	0.08468	1.65763	324.34	4.34147	1307.3	1.65763	0.248099		286_81	0.0213502	1.20718	1.55172	7.24289	42.0946	1.20782	105.025	90.0277	72.3577	58.4249	56.6875	55.4656	74.5342	60.1626	1321.49	0.0181652	1.40909
35	286_82	495.8	25.02	0.0504639	0.523147	5.13107	0.0447	4.83293	0.941896	22.3714	4.83294	0.08492	1.72354	281.9	4.83294	1312.8	1.72354	0.214732		286_82	-2.8692	4.29038	1.96121	9.32166	42.2973	13.3925	65.3266	62.0499	47.9675	34.7985	27.75	24.2105	33.913	33.8618	1864.3	0.254778	1.9263
35	286_83	501	25.8	0.051497	2.6559	3.58887	0.2094	3.18052	0.886218	4.77555	3.18052	0.09203	1.66261	1225.6	3.18052	1467.2	1.66261	0.835333		286_83	-7.59494	13.9152	4.57974	15.1204	59.4595	8.17052	83.9196	77.5623	76.0163	75.2747	72.5	74.0891	81.9876	69.9187	1493.5	0.115666	1.02356
35	286_84	193.8	64.31	0.331837	1.94085	4.74109	0.1636	4.38093	0.924033	6.11247	4.38093	0.08608	1.81259	976.8	4.38093	1339.1	1.81259	0.729445		286_84	-0.464135	1.38662	1.16379	5.16411	38.7838	0.603908	83.4171	70.3601	58.9431	42.1245	44.5625	38.0567	52.4224	46.3415	1224.67	0.0106174	1.59125
35	286_85	598	27.9	0.0466555	1.47099	3.6687	0.1182	3.0127	0.82119	8.46024	3.0127	0.0903	2.09356	720.2	3.0127	1431	2.09356	0.503284		286_85	-7.21519	9.91843	2.92026	9.10284	30.5405	4.22735	46.7337	51.2465	52.0325	55.8608	55.1875	58.7045	70.1863	55.2846	1339	0.111896	0.665851
35	286_86	728	117.4	0.161264	3.08072	3.87046	0.2537	3.53188	0.912521	3.94166	3.53188	0.08811	1.58314	1457.5	3.53188	1384	1.58314	1.05311		286_86	-7.51055	9.55954	5.54957	17.593	57.1622	6.34103	85.4271	83.6565	96.3415	93.956	92.3125	97.5709	116.149	109.35	1483.2	0.0907418	0.735496
35	286_87	289.2	48.6	0.16805	0.0365267	9.93222	0.00383	9.42338	0.948768	261.097	9.42337	0.0692	3.13832	24.64	9.42337	903.8	3.13832	0.0272627		286_87	-7.173	6.49266	3.03879	10.3282	42.1622	6.28774	103.015	104.432	92.2764	80.5861	74.5625	87.8543	114.286	116.26	1658.3	0.0954076	0.901382
35	286_88	190.4	96.9	0.508929	0.527772	5.98378	0.0442	5.68926	0.95078	22.6244	5.68926	0.08664	1.85417	278.81	5.68926	1351.6	1.85417	0.206281		286_88	-2.74262	1.41925	1.06681	5.51422	62.973	1.79396	166.332	139.612	111.382	67.033	52.375	51.0121	56.8323	44.3089	1812.8	0.0175286	2.92671
35	286_89	507	49.9	0.0984221	1.9445	5.38516	0.1593	5.12735	0.952127	6.27746	5.12735	0.08857	1.64626	952.9	5.12735	1394	1.64626	0.683572		286_89	-8.86076	8.85808	2.98491	7.78993	32.8378	5.50622	49.7487	47.0914	56.0976	51.4652	59.8125	56.6802	68.5714	57.7236	1255.57	0.136231	0.725503
35	286_9	124.5	71.2	0.571888	0.0172711	8.75252	0.001952	2.9481	0.336829	512.295	2.9481	0.0642	8.24108	12.57	2.9481	747.3	8.24108	0.0168206		286_9	0.481013	6.21533	0.786638	4.31072	21.2838	7.26465	102.513	214.404	357.317	556.777	920	1550.61	2701.86	3134.15	1689.2	0.155526	0.0379414
35	286_90	483.7	61.9	0.127972	0.379175	4.91651	0.0331	4.5514	0.925737	30.2115	4.5514	0.08312	1.85927	209.92	4.5514	1271.2	1.85927	0.165135		286_90	-5.86498	11.7129	4.22414	11.3786	40.8108	8.34813	68.3417	65.374	73.1707	70.3297	78.125	77.3279	87.1429	81.3008	1472.9	0.158073	0.784249
35	286_91	495	81.6	0.164848	1.77661	3.52436	0.1429	3.11406	0.88358	6.9979	3.11406	0.09021	1.65039	861	3.11406	1429.1	1.65039	0.602477		286_91	0.548523	14.7961	9.23491	24.2888	68.2432	10.6217	136.683	115.789	120.732	100.916	110	112.551	123.602	108.537	1297.8	0.109978	1.10583
35	286_92	519	63	0.121387	0.422653	5.12744	0.0375	4.84711	0.945327	26.6667	4.84711	0.08178	1.67218	237.32	4.84711	1239.4	1.67218	0.19148		286_92	0.168776	6.11746	2.90948	9.40919	27.1622	3.32149	70.3518	109.141	184.146	267.399	473.75	696.356	1136.65	1276.42	1802.5	0.0759825	0.0618942
35	286_93	316	39.6	0.125316	0.620751	6.32101	0.0538	6.03192	0.954266	18.5874	6.03192	0.08372	1.88972	337.81	6.03192	1285.2	1.88972	0.262846		286_93	0.0970464	3.88254	5.53879	14.6171	33.2432	1.27886	63.3166	62.3269	62.8862	57.5092	60.25	57.8947	66.4596	59.7561	2163	0.0278749	0.952707
35	286_94	474	21.1	0.0445148	1.0523	4.19834	0.0841	3.75854	0.895245	11.8906	3.75854	0.09079	1.87068	520.55	3.75854	1441.3	1.87068	0.361167		286_94	0.0675106	2.18597	3.83621	13.0853	81.0811	1.91829	228.643	203.047	154.065	121.245	104.375	101.215	99.3789	91.4634	1431.7	0.0140889	2.30072
35	286_95	519	22.8	0.0439306	1.61552	4.4502	0.13	4.09214	0.91954	7.69231	4.09214	0.09017	1.74891	787.9	4.09214	1428.3	1.74891	0.551635		286_95	0.21097	9.11909	5.46336	14.3982	30.473	3.9254	58.7437	52.6316	48.374	36.63	37.5	34.0081	43.1056	34.7154	1452.3	0.0927782	1.36279
35	286_96	186.5	70.2	0.376408	0.926099	3.92468	0.0781	3.44206	0.87703	12.8041	3.44206	0.08604	1.88556	484.77	3.44206	1338.2	1.88556	0.362255		286_96	0.126582	5.17129	5.22629	17.1991	53.9865	10.9414	87.4372	62.0499	54.1463	45.0549	47.25	51.417	64.1615	66.2602	2142.4	0.159251	1.36277
35	286_97	399.7	77.3	0.193395	1.92492	3.56992	0.1575	3.11127	0.871524	6.34921	3.11127	0.08868	1.75052	942.9	3.11127	1396.4	1.75052	0.675236		286_97	0.0303798	3.18108	3.3944	8.66521	20.8784	0.905861	41.7085	44.0443	36.5854	25.641	23.8125	24.7773	29.0683	23.0894	1740.7	0.0306974	1.43485
35	286_99	391.8	49.04	0.125166	1.76626	3.5046	0.1418	3.12506	0.891703	7.05219	3.12506	0.09038	1.58625	854.8	3.12506	1432.7	1.58625	0.596636		286_99	0.35443	10.0489	5.02155	12.7133	40.3378	4.90231	74.8744	84.2105	132.114	160.073	245	353.846	516.77	524.39	1472.9	0.0892027	0.144889
15	286R_1	196	113	0.576531	0.392925	6.84865	0.0346	6.22113	0.908372	28.9017	6.22113	0.0824	2.86385	219.27	6.22113	1254.2	2.86385	0.174829		286R_1	0	0.815661	0.226293	9.19037	33.7838	0	54.7739	69.2521	58.5366	39.5604	41.875	35.2227	49.6894	48.7805	1390.5	0	1.10232
15	286R_10	109.9	432	3.93085	3.09057	4.76252	0.25	4.3736	0.918337	4	4.3736	0.0897	1.885	1438.5	4.3736	1418.3	1.885	1.01424		286R_10	-0.0113924	6.49266	5.28017	110.284	200	0	337.688	249.307	203.252	142.857	129.375	97.5709	145.342	98.7805	1369.9	0	2.32341
15	286R_100	431	33.6	0.0779582	2.98911	6.49074	0.24	6.27039	0.966051	4.16667	6.27039	0.09037	1.67689	1386.7	6.27039	1432.5	1.67689	0.968028		286R_100	0	0.897227	2.04741	3.93873	43.2432	1.88277	81.407	85.0416	75.2033	51.6484	38.125	33.6032	29.8137	27.6423	1277.2	0.0317327	2.73053
15	286R_11	154.4	57.3	0.371114	2.24254	5.12418	0.1796	4.76744	0.930382	5.56793	4.76744	0.0906	1.87848	1064.8	4.76744	1437.4	1.87848	0.740782		286R_11	0	1.4845	0.614224	17.7243	28.3784	0	68.8442	77.5623	77.6423	75.0916	51.25	48.583	62.1118	51.2195	1266.9	0	1.10839
15	286R_15	244.2	72.3	0.296069	0.0872843	17.5208	0.00681	12.8362	0.732626	146.843	12.8362	0.093	11.9252	43.75	12.8362	1487	11.9252	0.0294217		286R_15	-0.0548523	3.88254	1.70259	17.0678	65.5405	1.7762	85.9296	96.3989	87.3984	58.6081	50	40.8907	55.9006	39.8374	1359.6	0.0236682	1.53719
15	286R_18	287.4	46.7	0.162491	0.979397	7.29597	0.0845	7.01499	0.961488	11.8343	7.01499	0.0841	2.00529	522.9	7.01499	1294	2.00529	0.404096		286R_18	0	1.28874	0.0969828	11.1597	35.1351	0	65.8291	70.9141	68.6992	52.1978	46.25	55.8704	51.5528	55.6911	1328.7	0	1.27693
15	286R_2	462	80.3	0.17381	2.35302	4.60369	0.1934	4.2884	0.931512	5.17063	4.2884	0.08828	1.67441	1139.8	4.2884	1387.7	1.67441	0.821359		286R_2	-0.0177215	1.02773	0.280172	12.9103	84.4595	1.08348	142.714	171.745	178.455	130.037	131.25	146.154	144.099	131.707	1442	0.00986881	0.990383
15	286R_25	197	93.4	0.474112	0.553698	6.92241	0.0465	6.04597	0.873391	21.5054	6.04597	0.0864	3.37136	293	6.04597	1346.3	3.37136	0.217634		286R_25	0	2.82219	0.678879	22.3195	55.4054	0.53286	95.9799	112.188	99.187	94.8718	102.5	95.9514	136.025	101.626	1328.7	0.00730713	0.705606
15	286R_30	207.4	62.3	0.300386	1.26095	14.0744	0.102	13.9169	0.988804	9.80392	13.9169	0.0897	2.10019	626.1	13.9169	1418.3	2.10019	0.441444		286R_30	-0.0147679	1.53344	0	10.7221	35.1351	0	68.8442	62.6039	56.0976	35.8974	48.125	43.7247	39.1304	36.1789	1149.48	0	1.75935
15	286R_31	308	82.5	0.267857	2.90003	4.36631	0.2429	3.94991	0.904634	4.11692	3.94991	0.08663	1.86088	1401.8	3.94991	1351.4	1.86088	1.03729		286R_31	0	1.45188	0.49569	18.3807	41.8919	0.71048	148.241	139.335	143.089	129.121	118.75	122.267	93.1677	96.3415	1545	0.00901576	1.59112
15	286R_35	132	35.9	0.27197	0.354716	9.64742	0.034	8.83407	0.915693	29.4118	8.83408	0.0757	3.87709	215.53	8.83408	1086.2	3.87709	0.198426		286R_35	0	2.98532	0.172414	7.00219	28.3784	4.79574	76.8844	80.6094	70.7317	60.8059	51.875	52.2267	71.4286	69.1057	1247.33	0.10267	1.07638
15	286R_36	302.6	21.5	0.0710509	1.09163	11.2635	0.0894	11.0912	0.984702	11.1857	11.0912	0.0886	1.9626	552	11.0912	1394.7	1.9626	0.395784		286R_36	0	0.897227	0	2.31947	12.1622	1.7762	64.3216	101.385	87.3984	58.0586	48.75	38.8664	34.1615	41.0569	1310.16	0.063505	1.88287
15	286R_37	203.1	67	0.329887	0.168888	13.0206	0.0148	12.3777	0.950627	67.5676	12.3777	0.0828	4.04075	94.71	12.3777	1263.6	4.04075	0.0749525		286R_37	-0.0172996	1.30506	0.603448	8.75274	31.7568	0	62.8141	50.4155	59.3496	31.3187	40	42.5101	35.4037	40.2439	1349.3	0	1.77422
15	286R_38	92.6	38.5	0.415767	0.0699384	18.6385	0.00743	13.5214	0.725456	134.589	13.5214	0.0683	12.8283	47.72	13.5214	877	12.8283	0.0544128		286R_38	0	5.677	0.721983	10.9409	29.7297	7.1048	65.8291	85.0416	121.951	133.7	123.75	148.988	174.534	191.87	1246.3	0.160601	0.377171
15	286R_39	213.8	58.1	0.271749	0.0481583	17.2933	0.00486	14.9923	0.866943	205.761	14.9923	0.0719	8.61909	31.25	14.9923	982.2	8.61909	0.0318163		286R_39	-0.0253165	1.56607	1.13147	10.9409	43.9189	6.2167	91.4573	98.0609	65.4472	47.0696	41.875	31.9838	37.8882	29.6748	1138.15	0.09809	2.41387
15	286R_40	149.1	33.7	0.226023	0.493756	11.8676	0.0403	11.4007	0.960658	24.8139	11.4007	0.0889	3.29604	254.7	11.4007	1401.1	3.29604	0.181786		286R_40	0	3.37684	0.247845	9.62801	27.027	2.13144	75.3769	87.2576	91.0569	85.1648	100	91.9028	100	70.7317	1194.8	0.0472231	0.753769
15	286R_42	420	160.7	0.382619	3.25862	4.76399	0.26	4.48139	0.940681	3.84615	4.48139	0.09094	1.61638	1489.8	4.48139	1444.5	1.61638	1.03136		286R_42	0	1.32137	0.905172	9.19037	73.6486	2.48668	206.03	227.147	233.333	173.993	148.75	117.004	104.348	85.7724	1462.6	0.020187	1.97446
15	286R_43	165	58.5	0.354545	0.340455	14.5541	0.0292	13.5528	0.931198	34.2466	13.5528	0.0846	5.30515	185.5	13.5528	1305.5	5.30515	0.142091		286R_43	-0.177215	2.02284	0.969828	5.03282	30.4054	3.90764	70.3518	75.0693	72.7642	54.3956	50	52.6316	42.8571	39.8374	1236	0.0844892	1.64154
15	286R_44	266	25.9	0.0973684	1.08425	8.51848	0.0857	8.26128	0.969807	11.6686	8.26128	0.0918	2.07745	530.1	8.26128	1462.4	2.07745	0.362486		286R_44	0	1.09299	0.12931	2.69147	35.8108	0.44405	66.8342	74.5152	84.5528	56.7766	46.25	41.7004	29.1925	18.2927	1380.2	0.00907664	2.28943
15	286R_47	353	45.5	0.128895	3.12374	4.80143	0.2549	4.51381	0.940098	3.92311	4.51381	0.08892	1.63683	1463.7	4.51381	1401.6	1.63683	1.04431		286R_47	0.0843882	1.89233	2.53233	14.442	37.8378	0	56.7839	49.8615	66.6667	52.7473	69.375	64.7773	103.106	93.0894	1328.7	0	0.550736
15	286R_49	163.9	82.2	0.501525	2.94593	4.08703	0.2391	3.62521	0.887006	4.18235	3.62522	0.0894	1.88722	1382	3.62522	1411.9	1.88722	0.978823		286R_49	0.071308	1.25612	0.732759	8.09628	39.8649	0	100.503	106.925	93.0894	70.5128	73.75	61.9433	61.4907	52.439	1390.5	0	1.63443
15	286R_5	405	18.7	0.0461728	0.0160167	16.8549	0.00199	8.3627	0.496159	502.513	8.3627	0.0584	14.6339	12.82	8.3627	544	14.6339	0.0235662		286R_5	-0.0202532	1.87602	0	4.13567	27.027	4.4405	84.4221	119.391	116.26	79.8535	70.625	108.907	169.565	225.61	1349.3	0.0929618	0.497874
15	286R_50	303	157.9	0.521122	2.58999	9.58257	0.208	9.41972	0.983006	4.80769	9.41972	0.09035	1.75909	1218.2	9.41972	1432.1	1.75909	0.850639		286R_50	0	1.82708	2.03664	20.5689	39.8649	0	63.3166	57.3407	60.1626	59.8901	66.875	48.9879	76.3975	60.5691	1372.99	0	0.828778
15	286R_53	332	29.7	0.0894578	0.363664	11.955	0.0367	11.673	0.976413	27.248	11.673	0.0719	2.58123	232.3	11.673	982.2	2.58123	0.23651		286R_53	-0.07173	1.12561	0.398707	5.03282	23.6486	1.61634	72.8643	152.909	161.382	276.557	562.5	1004.05	1900.62	2711.38	1363.72	0.0389379	0.0383371
15	286R_56	163.4	71.6	0.438188	2.65967	6.70785	0.215	6.46918	0.964419	4.65116	6.46918	0.08976	1.77341	1255.4	6.46918	1419.6	1.77341	0.884334		286R_56	1.02532	1.74551	0.355603	4.11379	25	0	63.8191	43.2133	57.3171	48.5348	49.375	34.0081	33.5404	22.7642	1472.9	0	1.90275
15	286R_57	120.1	41.7	0.347211	1.28898	8.49636	0.1045	8.08524	0.951612	9.56938	8.08524	0.0895	2.61096	640.7	8.08524	1414	2.61096	0.453112		286R_57	0	4.51876	3.44828	4.90153	14.2568	1.7762	34.6734	48.4765	47.9675	59.3407	55	55.8704	54.0373	41.0569	1291.62	0.0798883	0.641657
15	286R_6	138.8	55.5	0.399856	0.0887967	15.9345	0.00866	11.6609	0.731805	115.473	11.6609	0.0744	10.8596	55.59	11.6609	1051	10.8596	0.0528925		286R_6	0.0261603	1.45188	0.635776	11.5974	48.6486	1.95382	73.3668	77.0083	70.3252	57.5092	48.125	32.7935	42.236	47.1545	1514.1	0.0327039	1.73707
15	286R_60	239.5	58.1	0.242589	1.81093	7.36527	0.15	7.05227	0.957503	6.66667	7.05226	0.0876	2.12431	901	7.05226	1372.9	2.12431	0.656275		286R_60	0	0.668842	0.366379	4.814	37.8378	1.7762	79.8995	92.2438	99.5935	72.7106	78.75	74.4939	70.1863	56.0976	1503.8	0.032304	1.13839
15	286R_69	166.6	58.6	0.351741	1.87088	5.01348	0.15	4.55644	0.908838	6.66667	4.55644	0.0905	2.09137	901	4.55644	1435.2	2.09137	0.627787		286R_69	0	1.09299	6.03448	4.07002	19.5946	1.7762	70.8543	67.036	47.561	34.6154	28.125	28.7449	20.0621	19.5122	1163.9	0.0476695	3.53175
15	286R_70	155.6	55	0.35347	0.898684	10.4737	0.0858	10.0567	0.96019	11.655	10.0567	0.076	2.92582	530.6	10.0567	1094.2	2.92582	0.48492		286R_70	0	1.50082	1.61638	4.59519	29.7297	2.6643	54.2714	50.9695	49.5935	39.7436	35	13.3603	26.087	21.5447	1233.94	0.0663288	2.0804
15	286R_72	243	72.7	0.299177	1.00984	5.22198	0.0793	4.64475	0.889462	12.6103	4.64475	0.0924	2.3865	491.9	4.64475	1474.8	2.3865	0.333537		286R_72	0	1.76183	1.50862	6.25821	34.4595	3.90764	50.2513	67.59	57.3171	60.989	93.125	63.5628	77.6398	68.2927	1442	0.0939045	0.647236
15	286R_73	168.4	78	0.463183	1.71936	5.48701	0.1377	4.92707	0.897953	7.26216	4.92707	0.0906	2.41479	831.6	4.92707	1437.4	2.41479	0.578545		286R_73	0	1.15824	0.377155	4.20131	21.8243	0.390764	49.2462	44.3213	41.8699	42.4908	74.375	50.6073	63.354	68.6992	1411.1	0.0119195	0.777318
15	286R_74	245	242.3	0.98898	2.66335	4.8918	0.2147	4.53841	0.927759	4.65766	4.53841	0.09001	1.82552	1253.8	4.53841	1424.9	1.82552	0.879921		286R_74	0	2.33279	9.15948	15.3173	58.1081	0	78.392	88.0886	63.8211	51.4652	63.125	53.4413	49.6894	42.6829	1411.1	0	1.57764
15	286R_75	385	219.2	0.569351	2.32752	4.682	0.1907	4.37626	0.9347	5.24384	4.37626	0.08856	1.66416	1125.2	4.37626	1393.8	1.66416	0.807289		286R_75	0.206751	2.61011	9.05172	15.3173	45.9459	0	66.8342	72.5762	68.6992	69.9634	73.75	80.9717	80.1242	86.1789	1421.4	0	0.834132
15	286R_76	223	73.2	0.328251	0.885126	6.78392	0.0771	6.39425	0.942561	12.9702	6.39425	0.0833	2.26607	478.8	6.39425	1275.4	2.26607	0.375412		286R_76	0	1.41925	1.72414	4.55142	25.6757	0.408526	76.3819	70.9141	74.7967	43.956	45	31.5789	37.8882	19.9187	1266.9	0.00922493	2.01598
15	286R_77	152.6	100.1	0.655963	0.799641	12.1306	0.0705	11.8564	0.977396	14.1844	11.8564	0.0823	2.5646	439.2	11.8564	1251.8	2.5646	0.350855		286R_77	0	1.40294	2.15517	5.20788	29.0541	0.941385	72.8643	61.2188	60.1626	44.1392	42.5	32.3887	44.0994	33.7398	1282.35	0.02046	1.65228
15	286R_78	165.7	59.1	0.356669	0.0497261	16.3378	0.00422	13.468	0.824347	236.967	13.468	0.0855	9.24857	27.15	13.468	1326	9.24857	0.0204751		286R_78	0.257384	3.91517	5.38793	4.24508	36.4865	3.37478	79.397	83.1025	94.3089	95.2381	136.25	153.846	198.758	199.187	1133	0.0627014	0.399466
15	286R_79	261	85.5	0.327586	0.0313564	15.205	0.00316	9.46104	0.622231	316.456	9.46104	0.072	11.903	20.34	9.46104	985	11.903	0.0206497		286R_79	0	2.18597	3.55603	6.12691	68.2432	0.390764	85.4271	72.8532	77.2358	56.4103	54.375	59.1093	55.9006	41.0569	1452.3	0.00511784	1.5282
15	286R_81	237.1	45.3	0.191059	1.32772	5.96414	0.1096	5.60329	0.939496	9.12409	5.60329	0.0879	2.04307	670.4	5.60329	1379.4	2.04307	0.486008		286R_81	0	1.19086	1.61638	1.59737	30.4054	2.34458	69.3467	55.4017	49.187	32.0513	23.75	20.2429	20.4969	16.2602	1246.3	0.0510596	3.38328
15	286R_83	137.6	65.8	0.478198	0.373928	10.2272	0.028	8.87465	0.867749	35.7143	8.87465	0.0969	5.08295	178.02	8.87465	1564.4	5.08295	0.113794		286R_83	0	2.05546	0.474138	5.79869	34.4595	2.30906	77.8894	65.651	75.6098	57.5092	55	40.081	60.2484	57.3171	1462.6	0.0445699	1.2928
15	286R_84	221.3	47.8	0.215996	0.0740948	13.4829	0.00637	10.6133	0.787166	156.986	10.6133	0.0844	8.31546	40.93	10.6133	1300.9	8.31546	0.0314628		286R_84	0	1.37031	1.07759	2.45077	27.027	1.91829	88.9447	97.5069	68.6992	44.1392	42.5	31.9838	33.5404	32.9268	1380.2	0.0391252	2.65187
15	286R_85	150.2	103.5	0.689081	1.87501	7.45372	0.15	7.05227	0.946141	6.66667	7.05226	0.0907	2.41318	901	7.05226	1439.5	2.41318	0.625912		286R_85	0.0632911	6.13377	12.7155	9.19037	18.2432	2.48668	42.7136	48.1994	49.187	45.4212	70	78.5425	70.8075	45.935	1419.34	0.0890811	0.603235
15	286R_86	407	56.9	0.139803	3.31399	8.07188	0.265	7.88985	0.977449	3.77359	7.88985	0.09074	1.70456	1515.4	7.88985	1440.3	1.70456	1.05214		286R_86	0	0.880914	0.44181	2.58206	23.1081	1.10124	114.07	113.019	102.033	89.7436	79.375	65.1822	60.8696	47.561	1400.8	0.0214494	1.87401
15	286R_9	309	32.5	0.105178	1.1931	8.26185	0.0986	8.04375	0.973602	10.142	8.04375	0.0878	1.8858	606.2	8.04375	1377.2	1.8858	0.440168		286R_9	0	1.04405	0.193966	8.53392	40.5405	0	75.8794	81.7175	77.2358	67.5824	55	37.6518	44.0994	41.4634	1318.4	0	1.72065
15	286R_91	288.3	70.4	0.24419	1.43051	7.15658	0.1151	6.91008	0.965557	8.6881	6.91008	0.09018	1.86209	702.3	6.91008	1428.5	1.86209	0.491635		286R_91	0	1.46819	1.2931	2.53829	28.3784	2.84192	61.3065	80.8864	167.886	245.421	433.125	562.753	826.087	1024.39	1205.1	0.0681341	0.0742132
15	286R_93	179.8	83	0.461624	1.31013	8.39976	0.1125	8.06811	0.960517	8.88889	8.06811	0.0845	2.337	687.3	8.06811	1303.2	2.337	0.527394		286R_93	0.0177215	1.46819	5.81897	5.9081	53.3784	0.746004	82.4121	63.9889	77.6423	70.696	67.5	77.7328	61.4907	61.7886	1369.9	0.0112477	1.34024
15	286R_94	177.3	84.5	0.476593	1.8285	8.21535	0.145	7.9272	0.964925	6.89655	7.9272	0.0915	2.15673	872.9	7.9272	1456.2	2.15673	0.599437		286R_94	0	1.68026	3.34052	5.68928	31.7568	0	59.2965	58.1717	54.878	37.9121	38.125	34.413	35.4037	39.8374	1361.66	0	1.67487
15	286R_95	245.3	65.8	0.268243	2.59781	5.99456	0.21	5.72081	0.954333	4.7619	5.72081	0.08976	1.79085	1228.8	5.72081	1419.6	1.79085	0.865596		286R_95	0.333333	2.49592	4.9569	6.12691	45.2703	1.7762	116.583	95.8449	80.0813	79.1209	53.125	57.4899	49.6894	51.2195	1627.4	0.0244494	2.34623
15	286R_96	166.4	64.1	0.385216	0.188671	15.213	0.0159	14.0263	0.921994	62.8931	14.0263	0.0861	5.89055	101.69	14.0263	1339.6	5.89055	0.0759107		286R_96	0	1.15824	1.18534	5.03282	29.7297	2.82416	50.7538	47.0914	47.1545	43.5897	56.25	48.1781	59.6273	53.252	1227.76	0.0727041	0.851183
15	286R_99	307	82.3	0.268078	1.23933	4.76299	0.1036	4.4115	0.926203	9.65251	4.4115	0.0868	1.79576	635.5	4.4115	1355.2	1.79576	0.468934		286R_99	0	2.15334	1.93966	6.56455	47.973	1.17229	116.08	96.3989	90.2439	82.6007	78.75	59.5142	69.5652	64.2276	1503.8	0.0157093	1.66866
15	309-1_1	433	62.6	0.144573	2.53634	6.16393	0.201	5.93631	0.963072	4.97512	5.93631	0.09156	1.6596	1180.7	5.93631	1457.4	1.6596	0.810141		309-1_1	0.0421941	6.93312	0.0862069	0.0218818	13.5135	3.90764	44.2211	111.911	207.724	340.659	537.5	785.425	1422.36	1711.38	1297.8	0.159851	0.0310899
15	309-1_19	62.6	153.7	2.45527	1.50389	5.89174	0.1419	5.18877	0.880685	7.04722	5.18877	0.0769	2.79093	855.4	5.18877	1117.7	2.79093	0.765322		309-1_19	0	12.2349	2.80172	13.3479	21.6216	1.0302	20.201	30.1939	37.8049	35.5311	45	51.8219	73.2919	70.3252	1246.3	0.0492934	0.275624
15	309-1_2	273	50.2	0.183883	2.91586	4.27582	0.2246	3.94544	0.922734	4.45236	3.94544	0.0942	1.64806	1306.1	3.94544	1511.3	1.64806	0.864223		309-1_2	0	7.55302	0	0.284464	9.59459	5.3286	53.7688	118.283	184.959	250.916	304.375	348.988	496.894	593.496	1320.46	0.234603	0.10821
15	309-1_20	620	135.6	0.21871	1.03835	8.88749	0.0835	8.69302	0.978118	11.9761	8.69302	0.09023	1.84903	517	8.69302	1429.5	1.84903	0.361665		309-1_20	0	7.37357	0.420259	8.97155	25.6757	3.5524	50.7538	80.6094	141.463	206.96	306.25	404.858	602.484	707.317	1277.2	0.0984071	0.0842408
15	309-1_21	851	105.6	0.124089	1.66535	6.54707	0.1301	6.34972	0.969857	7.6864	6.34972	0.09288	1.59535	788.4	6.34972	1484.6	1.59535	0.531052		309-1_21	0	5.30179	1.2931	2.34136	25	3.73002	55.7789	119.391	197.561	296.703	437.5	554.656	950.311	906.504	1009.4	0.0998863	0.0586954
15	309-1_3	57.6	181.6	3.15278	1.1747	8.17165	0.1042	7.64772	0.935884	9.59693	7.64772	0.0818	2.87895	639	7.64772	1239.9	2.87895	0.515364		309-1_3	0	2.95269	0.075431	1.37856	15.5405	4.97336	21.608	38.7812	32.9268	35.1648	31.875	21.8623	30.4348	28.0488	1267.93	0.271399	0.709978
15	309-1_35	1111	47.9	0.0431143	1.06695	9.64349	0.0858	9.49038	0.984123	11.655	9.49038	0.09023	1.7116	530.6	9.49038	1429.5	1.7116	0.371179		309-1_35	0	3.99674	0.301724	0.350109	14.8649	2.13144	55.7789	146.814	251.626	368.132	465.625	497.976	776.398	886.179	1431.7	0.0740214	0.0718432
15	309-3_74	816	186	0.227941	0.813286	8.09017	0.062	7.92188	0.979198	16.129	7.92188	0.09518	1.64154	387.8	7.92188	1530.8	1.64154	0.253332		309-3_74	0	12.1207	0.172414	0.0875274	7.83784	5.3286	85.4271	101.939	183.333	307.692	556.25	914.98	1664.6	2743.9	1297.8	0.205929	0.05132
15	309-3_77	154.5	110.8	0.717152	0.581296	9.32767	0.0455	8.23961	0.883352	21.978	8.23961	0.0927	4.37198	286.8	8.23961	1480.9	4.37198	0.193666		309-3_77	0	10.9299	0.355603	11.1597	33.1081	6.2167	97.4874	45.4294	19.1057	9.89011	10.25	8.50202	4.28571	5.28455	1266.9	0.109425	22.7471
12	18KH1-1	650	66	0.101538	1.46638	6.65129	0.1216	6.35208	0.955014	8.22368	6.35208	0.0875	1.97251	739.8	6.35208	1370.7	1.97251	0.539724		18KH1-1
12	18KH1-16	650	38.5	0.0592308	1.47886	6.41868	0.123	6.13825	0.956311	8.13008	6.13825	0.08724	1.87651	747.8	6.13825	1364.9	1.87651	0.547879		18KH1-16
12	18KH1-161	446	244.3	0.547758	2.54263	4.47897	0.1917	4.14046	0.924424	5.21648	4.14046	0.09624	1.70813	1130.6	4.14046	1551.6	1.70813	0.728667		18KH1-161
12	18KH1-163	197.3	79	0.400405	0.263155	13.7223	0.0204	12.951	0.943792	49.0196	12.951	0.0936	4.53577	130.18	12.951	1499.2	4.53577	0.086833		18KH1-163
12	18KH1-164	706	62.2	0.088102	1.08078	6.90777	0.092	6.7108	0.971485	10.8696	6.71079	0.08524	1.63785	567.4	6.71079	1320.1	1.63785	0.429816		18KH1-164
12	18KH1-165	320.5	29.2	0.0911076	2.5738	7.54705	0.216	7.31542	0.969308	4.62963	7.31542	0.08646	1.85544	1260.7	7.31542	1347.6	1.85544	0.935515		18KH1-165
12	18KH1-166	856	92.7	0.108294	1.20818	4.55825	0.0985	4.14786	0.909968	10.1523	4.14786	0.089	1.8902	605.6	4.14786	1403.3	1.8902	0.431554		18KH1-166
12	18KH1-167	238.5	140	0.587002	0.870734	10.7421	0.0675	10.4778	0.975393	14.8148	10.4778	0.0936	2.36836	421.1	10.4778	1499.2	2.36836	0.280883		18KH1-167
12	18KH1-168	114.4	107.5	0.939685	1.94548	6.32386	0.1565	6.01612	0.951335	6.38978	6.01612	0.0902	1.94875	937.3	6.01612	1428.9	1.94875	0.655959		18KH1-168
12	18KH1-17	342	380	1.11111	2.9475	4.18378	0.2256	3.68664	0.881175	4.43262	3.68664	0.0948	1.97806	1311.4	3.68664	1523.3	1.97806	0.860894		18KH1-17
12	18KH1-170	595	17.3	0.0290756	1.38324	5.26416	0.1163	4.95177	0.940657	8.59845	4.95177	0.0863	1.78643	709.2	4.95177	1344	1.78643	0.527679		18KH1-170
12	18KH1-171	503	80.7	0.160437	1.44347	8.65153	0.1197	8.42367	0.973662	8.35422	8.42367	0.0875	1.97251	728.8	8.42367	1370.7	1.97251	0.531699		18KH1-171
12	18KH1-172	65.5	72	1.09924	1.00447	14.1677	0.0818	11.8392	0.835651	12.2249	11.8393	0.0891	7.78177	506.9	11.8393	1405.4	7.78177	0.36068		18KH1-172
12	18KH1-173	524	104.6	0.199618	0.169422	12.2477	0.0146	11.8688	0.969065	68.4931	11.8688	0.0842	3.02279	93.44	11.8688	1296.3	3.02279	0.0720821		18KH1-173
12	18KH1-174	674	131.1	0.19451	0.345317	6.9448	0.027	6.01284	0.865804	37.037	6.01284	0.0928	3.47506	171.74	6.01284	1483	3.47506	0.115806		18KH1-174
12	18KH1-176	1157	673	0.581677	0.636368	5.83329	0.0518	5.52118	0.946495	19.305	5.52118	0.08914	1.88251	325.56	5.52118	1406.3	1.88251	0.231501		18KH1-176
12	18KH1-177	1136	1047	0.921655	0.376938	8.34189	0.0308	8.12456	0.973948	32.4675	8.12456	0.0888	1.89171	195.55	8.12456	1399	1.89171	0.139778		18KH1-177
12	18KH1-178	535	44.9	0.0839252	0.172237	11.4761	0.0131	10.9317	0.952561	76.3359	10.9317	0.0954	3.49274	83.9	10.9317	1535.1	3.49274	0.0546544		18KH1-178
12	18KH1-18	463	643	1.38877	2.19736	5.79271	0.1694	5.51973	0.952875	5.90319	5.51973	0.09412	1.75729	1008.8	5.51973	1509.7	1.75729	0.668212		18KH1-18
12	18KH1-180	627	77	0.122807	0.166758	11.6384	0.0159	10.9364	0.93968	62.8931	10.9364	0.0761	3.98097	101.69	10.9364	1096.8	3.98097	0.0927152		18KH1-180
12	18KH1-181	194.3	125.3	0.644879	3.2598	3.12331	0.2404	2.63683	0.844241	4.15973	2.63683	0.09839	1.67398	1388.8	2.63683	1593	1.67398	0.871814		18KH1-181
12	18KH1-182	440	453	1.02955	2.55813	3.40421	0.1942	2.95405	0.867765	5.14933	2.95405	0.09558	1.6918	1144.1	2.95405	1538.7	1.6918	0.74355		18KH1-182
12	18KH1-184	842	1864	2.21378	1.78111	4.6332	0.1375	4.36433	0.941968	7.27273	4.36433	0.09399	1.55537	830.5	4.36433	1507.1	1.55537	0.551058		18KH1-184
12	18KH1-186	1146	1694	1.47818	1.20825	5.75966	0.0864	5.48261	0.951898	11.5741	5.48262	0.10147	1.76485	534.2	5.48262	1650.3	1.76485	0.323699		18KH1-186
12	18KH1-187	728	1233	1.69368	1.17776	5.00178	0.0907	4.68309	0.936286	11.0254	4.68309	0.09422	1.75682	559.7	4.68309	1511.7	1.75682	0.370245		18KH1-187
12	18KH1-188	700	148	0.211429	2.03343	3.03836	0.1887	2.55509	0.840945	5.29942	2.55509	0.07819	1.64412	1114.3	2.55509	1150.8	1.64412	0.968283		18KH1-188
12	18KH1-189	342	119.2	0.348538	4.0697	6.78518	0.295	6.52079	0.961034	3.38983	6.52079	0.1001	1.87563	1666.5	6.52079	1625.1	1.87563	1.02548		18KH1-189
12	18KH1-190	827	446	0.539299	1.58827	6.69119	0.1193	6.30224	0.941872	8.38223	6.30224	0.0966	2.24806	726.5	6.30224	1558.6	2.24806	0.466123		18KH1-190
12	18KH1-192	374	286.8	0.766845	3.24291	3.34491	0.2447	2.89447	0.865335	4.08664	2.89447	0.09616	1.67644	1411.1	2.89447	1550.1	1.67644	0.910328		18KH1-192
12	18KH1-194	274	154	0.562044	1.21082	6.3385	0.0919	5.70705	0.900379	10.8814	5.70705	0.0956	2.75793	566.8	5.70705	1539.1	2.75793	0.368267		18KH1-194
12	18KH1-195	658	57.1	0.0867781	2.07331	4.13557	0.1472	3.77159	0.911988	6.79348	3.77159	0.1022	1.69648	885.2	3.77159	1663.6	1.69648	0.532099		18KH1-195
12	18KH1-196	271	118.1	0.435793	1.56808	6.63993	0.1213	6.28893	0.947138	8.24402	6.28893	0.0938	2.13027	738	6.28893	1503.2	2.13027	0.490953		18KH1-196
12	18KH1-197	743	45.4	0.0611036	2.54292	3.92629	0.2057	3.56392	0.907708	4.86145	3.56392	0.0897	1.64748	1205.9	3.56392	1418.3	1.64748	0.850243		18KH1-197
12	18KH1-198	253	256	1.01186	0.0939472	15.2271	0.00772	11.8827	0.780366	129.534	11.8827	0.0883	9.52188	49.58	11.8827	1388.2	9.52188	0.0357153		18KH1-198
12	18KH1-199	129.4	94.3	0.728748	2.96157	4.20885	0.2262	3.75011	0.891005	4.42087	3.75011	0.095	1.91079	1314.6	3.75011	1527.2	1.91079	0.860791		18KH1-199
12	18KH1-2	646	231	0.357585	3.94235	3.49175	0.2722	3.08586	0.883757	3.67377	3.08586	0.10509	1.63395	1552	3.08586	1715.1	1.63395	0.904904		18KH1-2
12	18KH1-200	668	146.8	0.21976	0.262237	9.59096	0.0186	8.38608	0.874374	53.7634	8.38608	0.1023	4.65404	118.8	8.38608	1665.4	4.65404	0.0713342		18KH1-200
12	18KH1-201	193.1	66.7	0.345417	1.14461	7.40063	0.0929	6.95737	0.940106	10.7643	6.95737	0.0894	2.52275	572.7	6.95737	1411.9	2.52275	0.405624		18KH1-201
12	18KH1-202	233.6	59	0.252568	2.63191	4.85292	0.2218	4.16437	0.858117	4.50857	4.16437	0.0861	2.49176	1291.4	4.16437	1339.6	2.49176	0.964019		18KH1-202
12	18KH1-203	175.5	53	0.301994	0.280908	13.1095	0.0263	12.0094	0.916082	38.0228	12.0094	0.0775	5.25681	167.35	12.0094	1133.2	5.25681	0.147679		18KH1-203
12	18KH1-205	607.6	20.5	0.0337393	1.36231	5.50435	0.1219	5.21101	0.946709	8.20345	5.21101	0.08109	1.7729	741.5	5.21101	1222.7	1.7729	0.606445		18KH1-205
12	18KH1-206	207.3	63.4	0.305837	2.36969	5.15961	0.2102	4.77668	0.925783	4.75737	4.77668	0.0818	1.95061	1229.9	4.77668	1239.9	1.95061	0.991935		18KH1-206
12	18KH1-208	161.2	223.8	1.38834	0.347664	9.96461	0.0323	9.26825	0.930116	30.9597	9.26825	0.0781	3.65966	204.93	9.26825	1148.5	3.65966	0.178433		18KH1-208
12	18KH1-211	889	59	0.0663667	2.44921	6.73992	0.196	6.54021	0.97037	5.10204	6.54021	0.09067	1.62852	1153.8	6.54021	1438.8	1.62852	0.801918		18KH1-211
12	18KH1-213	193.8	68.8	0.355005	0.581788	7.22387	0.0529	6.64868	0.920377	18.9036	6.64868	0.0798	2.82477	332.3	6.64868	1191.2	2.82477	0.278962		18KH1-213
12	18KH1-214	139.3	108.4	0.778177	0.991173	7.52571	0.0786	7.00418	0.9307	12.7226	7.00418	0.0915	2.75278	487.8	7.00418	1456.2	2.75278	0.334981		18KH1-214
12	18KH1-215	215.5	63	0.292343	1.30945	7.06628	0.1215	6.6646	0.943154	8.23045	6.6646	0.0782	2.34851	739.2	6.6646	1151.1	2.34851	0.642168		18KH1-215
12	18KH1-216	236.9	63.6	0.268468	1.26171	6.64175	0.1103	6.24158	0.939749	9.06618	6.24158	0.083	2.27058	674.5	6.24158	1268.3	2.27058	0.531814		18KH1-216
12	18KH1-217	186.8	44.2	0.236617	2.3935	5.14979	0.2036	4.59539	0.892345	4.91159	4.59539	0.0853	2.32438	1194.6	4.59539	1321.5	2.32438	0.903973		18KH1-217
12	18KH1-218	198.8	96.5	0.485412	2.45029	5.01674	0.1914	4.67948	0.932774	5.22466	4.67948	0.09289	1.80835	1129	4.67948	1484.8	1.80835	0.760372		18KH1-218
12	18KH1-219	284.2	216.6	0.762139	0.786875	8.80719	0.0667	8.41632	0.955619	14.9925	8.41632	0.0856	2.59465	416.2	8.41632	1328.3	2.59465	0.313333		18KH1-219
12	18KH1-220	164.8	73.5	0.445995	0.18278	12.8809	0.0144	10.6676	0.828172	69.4444	10.6676	0.0921	7.21937	92.17	10.6676	1468.6	7.21937	0.0627605		18KH1-220
12	18KH1-222	166.3	86.1	0.517739	0.152008	15.016	0.0136	13.4337	0.89462	73.5294	13.4337	0.0811	6.70958	87.08	13.4337	1223	6.70958	0.071202		18KH1-222
12	18KH1-223	211.2	57.7	0.273201	1.98998	5.65387	0.1541	5.26601	0.931401	6.48929	5.26601	0.0937	2.05798	923.9	5.26601	1501.2	2.05798	0.615441		18KH1-223
12	18KH1-224	416.5	30.8	0.0739496	1.28136	4.45885	0.1146	4.03548	0.905048	8.726	4.03548	0.08113	1.8964	699.4	4.03548	1223.7	1.8964	0.571545		18KH1-224
12	18KH1-225	476	38.3	0.0804622	1.85118	5.11565	0.1571	4.78953	0.936252	6.36537	4.78953	0.0855	1.79728	940.6	4.78953	1326	1.79728	0.709351		18KH1-225
12	18KH1-227	219.2	94.6	0.431569	1.19259	4.91318	0.1054	4.43763	0.903209	9.48767	4.43763	0.0821	2.10874	646	4.43763	1247	2.10874	0.518043		18KH1-227
12	18KH1-228	232.6	45.2	0.194325	2.15899	6.00013	0.19	5.74376	0.957273	5.26316	5.74376	0.08245	1.73515	1121.4	5.74376	1255.3	1.73515	0.893332		18KH1-228
12	18KH1-229	830	48.8	0.0587952	0.670386	12.7543	0.0572	12.6239	0.989776	17.4825	12.6239	0.08504	1.81919	358.6	12.6239	1315.6	1.81919	0.272575		18KH1-229
12	18KH1-23	291	25.5	0.0876289	0.777682	7.59238	0.0667	7.1279	0.938822	14.9925	7.1279	0.0846	2.61483	416.2	7.1279	1305.5	2.61483	0.318805		18KH1-23
12	18KH1-230	122	46.2	0.378689	4.20224	6.65877	0.304	6.35208	0.953942	3.28947	6.35208	0.1003	1.99757	1711.1	6.35208	1628.8	1.99757	1.05053		18KH1-230
12	18KH1-231	420	473.4	1.12714	1.92287	4.9267	0.1525	4.61411	0.936551	6.55738	4.61411	0.09149	1.72697	915	4.61411	1456	1.72697	0.628434		18KH1-231
12	18KH1-233	298.1	127.4	0.427373	1.97504	5.48027	0.1603	4.99077	0.910679	6.2383	4.99077	0.0894	2.26398	958.4	4.99077	1411.9	2.26398	0.678802		18KH1-233
12	18KH1-235	264.1	54.8	0.207497	2.80837	9.9006	0.222	9.73506	0.98328	4.5045	9.73506	0.09179	1.80292	1292.4	9.73506	1462.2	1.80292	0.883874		18KH1-235
12	18KH1-236	258.6	147	0.568445	0.741364	6.37003	0.0645	5.75124	0.90286	15.5039	5.75124	0.0834	2.7387	402.9	5.75124	1277.7	2.7387	0.315332		18KH1-236
12	18KH1-237	163.2	64.6	0.395833	0.754493	13.1694	0.0658	12.6725	0.962266	15.1976	12.6725	0.0832	3.58353	410.8	12.6725	1273	3.58353	0.322702		18KH1-237
12	18KH1-238	939	32.9	0.0350373	1.45341	4.49027	0.1164	3.78567	0.843083	8.59107	3.78567	0.0906	2.41479	709.8	3.78567	1437.4	2.41479	0.493808		18KH1-238
12	18KH1-239	320	36.5	0.114062	1.409	9.53658	0.122	9.30512	0.97573	8.19672	9.30512	0.0838	2.08829	742.1	9.30512	1287	2.08829	0.576612		18KH1-239
12	18KH1-24	507	28.5	0.056213	2.10972	11.1124	0.178	10.9191	0.98261	5.61798	10.9191	0.086	2.06335	1056	10.9191	1337.3	2.06335	0.789651		18KH1-24
12	18KH1-241	149.4	64.6	0.432396	1.80376	14.6879	0.16	14.5578	0.991142	6.25	14.5578	0.0818	1.95061	956.8	14.5578	1239.9	1.95061	0.771675		18KH1-241
12	18KH1-242	190.3	93.4	0.490804	0.610159	9.19322	0.0572	8.19645	0.891575	17.4825	8.19645	0.0774	4.16336	358.6	8.19645	1130.6	4.16336	0.317177		18KH1-242
12	18KH1-243	142.6	79.7	0.558906	0.294586	13.1903	0.0285	11.1177	0.842868	35.0877	11.1177	0.075	7.09799	181.15	11.1177	1067.6	7.09799	0.16968		18KH1-243
12	18KH1-245	209.2	91	0.43499	0.64755	10.9254	0.0611	10.7242	0.981582	16.3666	10.7242	0.0769	2.08723	382.3	10.7242	1117.7	2.08723	0.342042		18KH1-245
12	18KH1-246	547	17.2	0.0314442	2.58835	4.42962	0.2156	4.0932	0.924054	4.63822	4.0932	0.08711	1.69328	1258.6	4.0932	1362.1	1.69328	0.924014		18KH1-246
12	18KH1-247	455.1	33.2	0.072951	0.78629	7.00199	0.0566	6.59763	0.94225	17.6678	6.59763	0.1008	2.34503	354.9	6.59763	1638.1	2.34503	0.216653		18KH1-247
12	18KH1-25	165.1	126.9	0.768625	1.07125	8.51218	0.0808	8.24797	0.96896	12.3762	8.24796	0.0962	2.10435	500.9	8.24796	1550.8	2.10435	0.322995		18KH1-25
12	18KH1-250	425	170.3	0.400706	0.236406	12.6561	0.0169	8.59739	0.679305	59.1716	8.59739	0.1015	9.28778	108.03	8.59739	1650.9	9.28778	0.065437		18KH1-250
12	18KH1-252	165.4	89.7	0.542322	1.05708	7.81565	0.0895	7.40534	0.947501	11.1732	7.40534	0.0857	2.49906	552.6	7.40534	1330.6	2.49906	0.415301		18KH1-252
12	18KH1-253	193.3	140.9	0.728919	0.926137	7.60109	0.075	7.30487	0.961029	13.3333	7.30487	0.0896	2.10131	466.2	7.30487	1416.2	2.10131	0.329191		18KH1-253
12	18KH1-255	134.8	87.8	0.651335	2.04887	9.58265	0.187	9.37735	0.978575	5.34759	9.37735	0.0795	1.97297	1105.1	9.37735	1183.7	1.97297	0.933598		18KH1-255
12	18KH1-256	578	29.4	0.0508651	1.96496	4.65585	0.1646	4.2589	0.914742	6.07533	4.2589	0.08662	1.88114	982.3	4.2589	1351.2	1.88114	0.726983		18KH1-256
12	18KH1-258	322	50.7	0.157453	1.33631	6.09543	0.1159	5.82293	0.955293	8.62813	5.82293	0.08366	1.80217	706.9	5.82293	1283.8	1.80217	0.550631		18KH1-258
12	18KH1-26	351	42.8	0.121937	0.444094	9.30706	0.0376	8.81595	0.947233	26.5957	8.81595	0.0857	2.98335	237.9	8.81595	1330.6	2.98335	0.178792		18KH1-26
12	18KH1-260	306.1	125.6	0.410323	1.50026	5.67736	0.1263	5.42105	0.954853	7.91766	5.42105	0.08619	1.68662	766.7	5.42105	1341.6	1.68662	0.571482		18KH1-260
12	18KH1-261	255	60.1	0.235686	0.508041	14.5037	0.0472	14.1709	0.97706	21.1864	14.1709	0.0781	3.08875	297.3	14.1709	1148.5	3.08875	0.258859		18KH1-261
12	18KH1-262	830	13.2	0.0159036	2.49242	4.78294	0.2073	4.49255	0.939286	4.82393	4.49255	0.08724	1.6412	1214.4	4.49255	1364.9	1.6412	0.889736		18KH1-262
12	18KH1-263	194.7	262.1	1.34617	0.604547	8.35632	0.0596	8.05353	0.963765	16.7785	8.05354	0.0736	2.22906	373.2	8.05354	1029.6	2.22906	0.362471		18KH1-263
12	18KH1-264	405	209.3	0.51679	2.60559	6.40527	0.23	6.10222	0.952688	4.34783	6.10222	0.0822	1.94689	1334.5	6.10222	1249.4	1.94689	1.06811		18KH1-264
12	18KH1-265	75.6	133.9	1.77116	0.830138	8.35441	0.0824	7.40508	0.886367	12.1359	7.40508	0.0731	3.86795	510.4	7.40508	1015.8	3.86795	0.502461		18KH1-265
12	18KH1-268	191.9	47.3	0.246483	1.02852	9.25413	0.0909	8.99006	0.971465	11.0011	8.99006	0.0821	2.19492	560.9	8.99006	1247	2.19492	0.4498		18KH1-268
12	18KH1-27	182.4	50.9	0.279057	0.77478	4.64383	0.0576	3.88016	0.835551	17.3611	3.88016	0.0976	2.55138	361.01	3.88016	1577.9	2.55138	0.228791		18KH1-27
12	18KH1-272	201.5	78.3	0.388586	1.29345	5.06233	0.1185	4.58488	0.905685	8.43882	4.58488	0.0792	2.14618	721.9	4.58488	1176.2	2.14618	0.613756		18KH1-272
12	18KH1-273	214.9	157.6	0.733364	1.35814	4.72481	0.1249	4.20717	0.890441	8.00641	4.20717	0.0789	2.15025	758.7	4.20717	1168.7	2.15025	0.649183		18KH1-273
12	18KH1-275	214	41.4	0.193458	0.360554	9.70591	0.0332	8.74173	0.900661	30.1205	8.74173	0.0788	4.21744	210.54	8.74173	1166.2	4.21744	0.180535		18KH1-275
12	18KH1-277	160.5	62.4	0.388785	0.697207	7.45213	0.063	7.05227	0.946342	15.873	7.05226	0.0803	2.40828	393.8	7.05226	1203.5	2.40828	0.327212		18KH1-277
12	18KH1-28	549	17.4	0.031694	0.447614	5.46019	0.0407	4.98492	0.912957	24.57	4.98492	0.0798	2.22807	257.17	4.98492	1191.2	2.22807	0.215892		18KH1-28
12	18KH1-282	202.1	166	0.821376	0.931884	7.25495	0.0683	6.70272	0.923883	14.6413	6.70272	0.099	2.77629	425.9	6.70272	1604.5	2.77629	0.265441		18KH1-282
12	18KH1-284	456	155.4	0.340789	1.56721	3.74183	0.1251	3.15407	0.842921	7.9936	3.15407	0.0909	2.01324	759.9	3.15407	1443.7	2.01324	0.526356		18KH1-284
12	18KH1-285	924	30.6	0.0331169	2.44828	5.42595	0.2021	5.05613	0.931843	4.94805	5.05613	0.0879	1.96887	1186.6	5.05613	1379.4	1.96887	0.860229		18KH1-285
12	18KH1-286	255.7	40.4	0.157998	0.529159	8.14991	0.0429	7.58331	0.930478	23.31	7.58331	0.0895	2.98571	270.8	7.58331	1414	2.98571	0.191513		18KH1-286
12	18KH1-287	371	23.6	0.0636119	2.06297	6.7724	0.168	6.38129	0.942249	5.95238	6.38129	0.0891	2.26817	1001.1	6.38129	1405.4	2.26817	0.712324		18KH1-287
12	18KH1-289	200.1	77.9	0.389305	1.62468	5.61116	0.1366	5.21931	0.930167	7.32064	5.21931	0.0863	2.06007	825.4	5.21931	1344	2.06007	0.614137		18KH1-289
12	18KH1-290	421	36.8	0.0874109	0.705545	8.31979	0.0572	8.0288	0.965024	17.4825	8.0288	0.0895	2.18112	358.6	8.0288	1414	2.18112	0.253607		18KH1-290
12	18KH1-292	277.3	74.1	0.26722	0.824753	5.71344	0.0694	5.41216	0.947269	14.4092	5.41217	0.08623	1.83081	432.5	5.41217	1342.5	1.83081	0.32216		18KH1-292
12	18KH1-293	174.1	65.1	0.373923	1.16712	9.06375	0.0942	8.59375	0.948145	10.6157	8.59376	0.0899	2.8808	580.3	8.59376	1422.5	2.8808	0.407944		18KH1-293
12	18KH1-294	185.8	59.6	0.320775	1.80404	6.25491	0.1496	5.8827	0.940493	6.68449	5.8827	0.0875	2.1255	898.7	5.8827	1370.7	2.1255	0.65565		18KH1-294
12	18KH1-295	185	37.35	0.201892	1.28041	7.53851	0.1063	7.15314	0.94888	9.40734	7.15314	0.0874	2.37944	651.2	7.15314	1368.5	2.37944	0.475849		18KH1-295
12	18KH1-296	393	435.1	1.10712	1.99239	5.3809	0.1705	5.06808	0.941865	5.8651	5.06808	0.08479	1.80793	1014.9	5.06808	1309.9	1.80793	0.774792		18KH1-296
12	18KH1-298	277	54.2	0.195668	2.4043	5.9578	0.211	5.69809	0.956408	4.73934	5.69809	0.08268	1.73988	1234.1	5.69809	1260.8	1.73988	0.978823		18KH1-298
12	18KH1-299	231.6	88.5	0.382124	1.65654	5.16872	0.1346	4.7539	0.919743	7.42942	4.7539	0.0893	2.02883	814.1	4.7539	1409.7	2.02883	0.577499		18KH1-299
12	18KH1-3	265	342	1.29057	3.38527	3.00144	0.2571	2.48222	0.82701	3.88954	2.48222	0.09554	1.68737	1475	2.48222	1537.9	1.68737	0.9591		18KH1-3
12	18KH1-30	965	63	0.065285	1.58887	4.29211	0.136	3.90983	0.910933	7.35294	3.90983	0.08477	1.77073	822	3.90983	1309.4	1.77073	0.627768		18KH1-30
12	18KH1-304	187.9	345.8	1.84034	2.63669	9.63928	0.218	9.45822	0.981217	4.58716	9.45822	0.08776	1.85948	1271.3	9.45822	1376.4	1.85948	0.923641		18KH1-304
12	18KH1-31	552	45.4	0.0822464	1.23792	4.66939	0.1043	4.30858	0.922731	9.58773	4.30858	0.08612	1.79979	639.6	4.30858	1340	1.79979	0.477313		18KH1-31
12	18KH1-313	262.2	124.5	0.474828	0.581325	6.13799	0.0462	5.48398	0.893449	21.645	5.48398	0.0913	2.75697	291.15	5.48398	1452	2.75697	0.200517		18KH1-313
12	18KH1-314	407	6.79	0.016683	2.24179	6.99159	0.1838	5.8568	0.837693	5.4407	5.8568	0.0885	3.8184	1087.7	5.8568	1392.5	3.8184	0.781113		18KH1-314
12	18KH1-316	152.2	95.5	0.627464	0.893182	6.92057	0.0652	6.26563	0.905364	15.3374	6.26563	0.0994	2.93872	407.2	6.26563	1612	2.93872	0.252605		18KH1-316
12	18KH1-321	353	33.7	0.0954674	1.07941	4.68395	0.0961	4.21987	0.900922	10.4058	4.21987	0.0815	2.03275	591.5	4.21987	1232.6	2.03275	0.47988		18KH1-321
12	18KH1-324	491	31.6	0.0643585	1.81738	7.38335	0.148	7.13749	0.966701	6.75676	7.13749	0.0891	1.88945	889.7	7.13749	1405.4	1.88945	0.633058		18KH1-324
12	18KH1-325	211.5	111	0.524823	1.04552	6.29358	0.0875	5.94837	0.945148	11.4286	5.94837	0.0867	2.05574	540.7	5.94837	1353	2.05574	0.39963		18KH1-325
12	18KH1-326	192.4	432	2.24532	2.18701	9.81376	0.171	9.63526	0.981812	5.84795	9.63526	0.0928	1.86322	1017.6	9.63526	1483	1.86322	0.686177		18KH1-326
12	18KH1-328	185.3	64.5	0.348084	0.666703	14.2487	0.0546	13.9275	0.97746	18.315	13.9275	0.0886	3.0082	342.7	13.9275	1394.7	3.0082	0.245716		18KH1-328
12	18KH1-329	744	31	0.0416667	0.611981	12.9499	0.0535	12.7328	0.983233	18.6916	12.7328	0.083	2.36146	336	12.7328	1268.3	2.36146	0.264922		18KH1-329
12	18KH1-33	671	12.4	0.0184799	2.78409	4.76247	0.2314	4.33395	0.91002	4.32152	4.33394	0.0873	1.97435	1341.8	4.33394	1366.3	1.97435	0.982068		18KH1-33
12	18KH1-330	147.4	97.7	0.662822	2.11906	5.61836	0.1607	5.31496	0.946	6.22278	5.31496	0.09568	1.82129	960.7	5.31496	1540.7	1.82129	0.623548		18KH1-330
12	18KH1-34	382.9	167.8	0.438235	1.86633	7.48083	0.122	7.18155	0.959994	8.19672	7.18155	0.111	2.09479	742.1	7.18155	1815	2.09479	0.408871		18KH1-34
12	18KH1-35	466	138.1	0.296352	2.46843	4.92164	0.1905	4.60501	0.935666	5.24934	4.60501	0.09402	1.73678	1124.1	4.60501	1507.7	1.73678	0.745573		18KH1-35
12	18KH1-37	581	609	1.04819	1.09105	4.96335	0.0862	4.6665	0.940192	11.6009	4.6665	0.09184	1.69075	533	4.6665	1463.2	1.69075	0.36427		18KH1-37
12	18KH1-38	1207	41.5	0.0343828	0.488515	8.52367	0.0418	8.22295	0.96472	23.9234	8.22295	0.0848	2.24411	264	8.22295	1310.1	2.24411	0.201511		18KH1-38
12	18KH1-39	1719	37.4	0.0217568	2.36329	6.5349	0.187	6.31602	0.966506	5.34759	6.31602	0.0917	1.67715	1105.1	6.31602	1460.3	1.67715	0.756762		18KH1-39
12	18KH1-4	558	502	0.899642	3.51911	2.99829	0.2481	2.56197	0.854477	4.03063	2.56197	0.10292	1.55758	1428.7	2.56197	1676.6	1.55758	0.852141		18KH1-4
12	18KH1-40	197.1	64.5	0.327245	2.96734	7.10628	0.216	6.87747	0.967801	4.62963	6.87747	0.09968	1.78877	1260.7	6.87747	1617.3	1.78877	0.779509		18KH1-40
12	18KH1-42	233.7	44.8	0.191699	1.89701	5.46024	0.1749	5.01785	0.918981	5.71755	5.01785	0.0787	2.15299	1039.1	5.01785	1163.7	2.15299	0.892928		18KH1-42
12	18KH1-43	1087	25.1	0.0230911	0.293189	14.7731	0.0256	14.635	0.990649	39.0625	14.635	0.0831	2.01559	163	14.635	1270.7	2.01559	0.128276		18KH1-43
12	18KH1-45	414.5	143.6	0.346441	1.22636	5.33568	0.0784	5.02194	0.941198	12.7551	5.02194	0.1135	1.80269	486.6	5.02194	1855.4	1.80269	0.262262		18KH1-45
12	18KH1-46	1033	55.1	0.0533398	0.409286	6.03892	0.0368	5.65217	0.935957	27.1739	5.65217	0.0807	2.12639	232.97	5.65217	1213.3	2.12639	0.192014		18KH1-46
12	18KH1-47	256	144.9	0.566016	0.472594	11.4584	0.0456	10.7747	0.940329	21.9298	10.7747	0.0752	3.89892	287.5	10.7747	1072.9	3.89892	0.267965		18KH1-47
12	18KH1-48	187	71.7	0.383422	2.12725	6.99001	0.176	6.65977	0.952756	5.68182	6.65977	0.0877	2.12313	1045.1	6.65977	1375.1	2.12313	0.760017		18KH1-48
12	18KH1-5	368	62.5	0.169837	1.46859	9.68356	0.12	9.45081	0.975964	8.33333	9.45081	0.0888	2.11035	730.6	9.45081	1399	2.11035	0.52223		18KH1-5
12	18KH1-51	313.3	22.6	0.0721353	2.28585	7.35903	0.178	7.12312	0.967942	5.61798	7.12312	0.09318	1.84839	1056	7.12312	1490.7	1.84839	0.708392		18KH1-51
12	18KH1-52	268.5	27.2	0.101304	2.3336	5.15449	0.2023	4.7467	0.920887	4.94315	4.7467	0.0837	2.00937	1187.7	4.7467	1284.7	2.00937	0.924496		18KH1-52
12	18KH1-53	678	185.1	0.273009	2.14389	4.21209	0.1681	3.85475	0.915164	5.94884	3.85475	0.09254	1.69782	1001.6	3.85475	1477.6	1.69782	0.677856		18KH1-53
12	18KH1-55	607	8.06	0.0132784	0.981467	4.36593	0.0815	3.93285	0.900804	12.2699	3.93285	0.08738	1.8958	505.07	3.93285	1368	1.8958	0.369203		18KH1-55
12	18KH1-56	551	128	0.232305	0.216556	10.9662	0.0163	10.68	0.973902	61.3497	10.68	0.0964	2.48899	104.23	10.68	1554.7	2.48899	0.0670419		18KH1-56
12	18KH1-57	105.6	69.8	0.660985	2.85185	4.65412	0.1576	4.12676	0.886691	6.34518	4.12676	0.1313	2.15189	943.4	4.12676	2114.6	2.15189	0.446136		18KH1-57
12	18KH1-58	510	95.4	0.187059	6.57299	3.8414	0.3216	3.43384	0.893901	3.10945	3.43384	0.1483	1.72196	1797.5	3.43384	2325.6	1.72196	0.772919		18KH1-58
12	18KH1-59	595	60.5	0.101681	2.17796	3.65744	0.1667	3.15495	0.862613	5.9988	3.15495	0.0948	1.85017	993.9	3.15495	1523.3	1.85017	0.652465		18KH1-59
12	18KH1-60	1276	21.4	0.0167712	1.2257	4.73651	0.0974	4.44079	0.937567	10.2669	4.44079	0.09131	1.64739	599.2	4.44079	1452.2	1.64739	0.412615		18KH1-60
12	18KH1-62	326	83	0.254601	0.330321	14.7815	0.0269	14.3124	0.968266	37.1747	14.3124	0.0891	3.6942	171.1	14.3124	1405.4	3.6942	0.121745		18KH1-62
12	18KH1-64	423.8	293	0.691364	2.92267	3.03218	0.2393	2.58052	0.851045	4.17886	2.58052	0.08862	1.59217	1383.1	2.58052	1395.1	1.59217	0.991398		18KH1-64
12	18KH1-66	874	215	0.245995	2.45455	3.56047	0.1925	3.1347	0.880418	5.1948	3.1347	0.09252	1.68837	1134.9	3.1347	1477.2	1.68837	0.768278		18KH1-66
12	18KH1-67	860	344.4	0.400465	0.533529	7.10699	0.0402	6.86445	0.965872	24.8756	6.86445	0.0963	1.84085	254.07	6.86445	1552.8	1.84085	0.163621		18KH1-67
12	18KH1-69	128	53.2	0.415625	3.11482	6.74534	0.233	6.43375	0.953806	4.29185	6.43375	0.097	2.02646	1350.2	6.43375	1566.4	2.02646	0.861977		18KH1-69
12	18KH1-7	424.8	106.9	0.251648	2.69543	3.83135	0.2113	3.47351	0.906601	4.73261	3.47351	0.09256	1.61679	1235.7	3.47351	1478	1.61679	0.836062		18KH1-7
12	18KH1-70	127.9	121	0.946052	2.85835	4.26413	0.2125	3.78955	0.888705	4.70588	3.78956	0.0976	1.95502	1242.1	3.78956	1577.9	1.95502	0.787185		18KH1-70
12	18KH1-71	266	94	0.353383	0.904061	13.0805	0.0761	12.8229	0.980312	13.1406	12.8229	0.0862	2.5828	472.8	12.8229	1341.8	2.5828	0.352362		18KH1-71
12	18KH1-72	577	24.2	0.0419411	0.086015	16.6401	0.0084	14.4697	0.869566	119.048	14.4697	0.0743	8.21718	53.92	14.4697	1048.7	8.21718	0.051416		18KH1-72
12	18KH1-73	296	98.4	0.332432	1.05593	10.4202	0.096	10.2611	0.984732	10.4167	10.2611	0.07981	1.81389	590.9	10.2611	1191.4	1.81389	0.495971		18KH1-73
12	18KH1-74	799	32.8	0.0410513	0.778765	10.4424	0.0639	10.2763	0.984098	15.6494	10.2763	0.08843	1.85482	399.3	10.2763	1391	1.85482	0.28706		18KH1-74
12	18KH1-75	400	76.8	0.192	2.71146	5.07179	0.2093	4.66723	0.920232	4.77783	4.66723	0.094	1.98497	1225.1	4.66723	1507.3	1.98497	0.812778		18KH1-75
12	18KH1-76	1320	46.7	0.0353788	0.113704	13.2342	0.0103	12.8292	0.969398	97.0874	12.8292	0.0801	3.24891	66.06	12.8292	1198.6	3.24891	0.0551143		18KH1-76
12	18KH1-77	964	121.1	0.125622	1.41407	4.55691	0.1231	4.25039	0.932735	8.12348	4.25039	0.08335	1.64305	748.4	4.25039	1276.5	1.64305	0.586291		18KH1-77
12	18KH1-78	543	210	0.38674	0.552217	8.20843	0.0429	7.80575	0.950943	23.31	7.80575	0.0934	2.53941	270.8	7.80575	1495.2	2.53941	0.181113		18KH1-78
12	18KH1-8	1029	46.5	0.0451895	0.667087	6.54364	0.0529	6.11973	0.935218	18.9036	6.11973	0.0915	2.31692	332.3	6.11973	1456.2	2.31692	0.228197		18KH1-8
12	18KH1-80	58.8	66.8	1.13605	3.31436	3.92501	0.2614	3.33145	0.848777	3.82556	3.33145	0.092	2.07535	1497	3.33145	1466.5	2.07535	1.0208		18KH1-80
12	18KH1-81	762	15.3	0.0200787	2.29906	5.08766	0.1875	4.75348	0.934316	5.33333	4.75348	0.08897	1.81348	1107.8	4.75348	1402.7	1.81348	0.789763		18KH1-81
12	18KH1-82	252	170.4	0.67619	1.16186	4.3793	0.0862	3.886	0.887356	11.6009	3.886	0.0978	2.01923	533.02	3.886	1581.8	2.01923	0.336971		18KH1-82
12	18KH1-83	66.7	46.3	0.694153	3.60383	8.38623	0.283	8.10696	0.966699	3.53357	8.10696	0.0924	2.14618	1606.5	8.10696	1474.8	2.14618	1.0893		18KH1-83
12	18KH1-84	1363	194	0.142333	0.483826	7.23696	0.0422	7.0224	0.970352	23.6967	7.02241	0.08319	1.74913	266.46	7.02241	1272.8	1.74913	0.209349		18KH1-84
12	18KH1-85	971	23.9	0.0246138	0.942303	7.10293	0.0806	6.84933	0.964297	12.407	6.84933	0.08483	1.88103	499.7	6.84933	1310.8	1.88103	0.381218		18KH1-85
12	18KH1-86	576	181.4	0.314931	2.85214	3.21993	0.2094	2.73526	0.849478	4.77555	2.73526	0.09883	1.69891	1225.6	2.73526	1601.3	1.69891	0.765378		18KH1-86
12	18KH1-88	454.6	377.7	0.83084	2.9513	3.90839	0.2244	3.56083	0.911073	4.45633	3.56083	0.09543	1.61121	1305.1	3.56083	1535.7	1.61121	0.84984		18KH1-88
12	18KH1-89	240.7	206.2	0.856668	0.422036	7.1998	0.0359	6.28551	0.873011	27.8551	6.28551	0.0853	3.51134	227.37	6.28551	1321.5	3.51134	0.172054		18KH1-89
12	18KH1-9	193.4	96.3	0.497932	3.26992	3.60171	0.253	3.11102	0.863763	3.95257	3.11102	0.09378	1.81489	1453.9	3.11102	1502.8	1.81489	0.967461		18KH1-9
12	18KH1-90	533	41.1	0.0771107	0.689406	5.77653	0.0573	5.40079	0.934953	17.452	5.40078	0.0873	2.04935	359.18	5.40078	1366.3	2.04935	0.262885		18KH1-90
12	18KH1-91	117.7	44.8	0.380629	0.418579	14.8606	0.0383	10.4393	0.702479	26.1097	10.4393	0.0793	10.5764	242.3	10.4393	1179	10.5764	0.205513		18KH1-91
12	18KH1-92	381	43.5	0.114173	0.408851	7.22409	0.0326	6.84001	0.946833	30.6748	6.84001	0.091	2.32418	206.8	6.84001	1445.7	2.32418	0.143045		18KH1-92
12	18KH1-93	267	80.4	0.301124	0.479105	6.68526	0.0466	6.23381	0.932471	21.4592	6.23381	0.0746	2.41502	293.61	6.23381	1056.8	2.41502	0.277829		18KH1-93
12	18KH1-94	394.3	47.2	0.119706	1.00066	5.54439	0.0886	5.26891	0.950314	11.2867	5.26891	0.08195	1.72593	547.3	5.26891	1243.4	1.72593	0.440164		18KH1-94
12	18KH1-95	297.9	39.9	0.133938	1.97632	4.2127	0.1669	3.77688	0.896547	5.99161	3.77688	0.08592	1.86601	995	3.77688	1335.5	1.86601	0.745039		18KH1-95
12	18KH1-96	396	67.6	0.170707	6.2403	3.78162	0.3475	3.31585	0.876833	2.8777	3.31585	0.1303	1.81819	1922.6	3.31585	2101.2	1.81819	0.915001		18KH1-96
12	18KH1-97	406	432	1.06404	0.127095	9.37053	0.01019	8.18081	0.873036	98.1354	8.18081	0.0905	4.5696	65.36	8.18081	1435.2	4.5696	0.0455407		18KH1-97
12	18KH1-98	173	216.6	1.25202	2.93723	3.64535	0.2227	3.21416	0.881714	4.49035	3.21416	0.0957	1.71982	1296.1	3.21416	1541	1.71982	0.841077		18KH1-98
12	18KH1-99	563	21.5	0.0381883	0.619409	6.2107	0.053	5.58948	0.899976	18.8679	5.58948	0.0848	2.7075	332.91	5.58948	1310.1	2.7075	0.25411		18KH1-99
Analyses w/ High Uncertainties
35	125_19	132.2	60.97	0.461195	0.0120882	15.3504	0.001457	3.1332	0.204112	686.342	3.1332	0.0602	15.0272	9.39	3.1332	610	15.0272	0.0153934		125_19	0.485232	6.5416	2.02586	7.00219	33.5811	5.64831	56.7839	60.1108	61.3821	60.6227	65	81.7814	106.211	122.764	1368.87	0.129348	0.534632
12	18KH1-652	1748	103.3	0.0590961	0.00350675	15.7517	0.000456	4.38047	0.278096	2192.98	4.38047	0.0558	15.1303	2.939	4.38047	443	15.1303	0.00663431		18KH1-652	0	2.74062	3.55603	13.5667	55.4054	1.7762	125.126	198.615	447.154	959.707	1937.5	3886.64	8074.53	10325.2	1411.1	0.0213325	0.0154963
15	18KH1cr-117	120.9	372	3.07692	0.0311436	18.2647	0.00376	9.84685	0.539118	265.957	9.84685	0.0601	15.3831	24.19	9.84685	606	15.3831	0.0399175		18KH1cr-117	0	7.48777	4.4181	26.2582	55.4054	6.57194	114.07	116.343	123.577	197.802	232.5	271.255	327.329	349.593	1730.4	0.0826668	0.348488
12	18KH1-207	906	219	0.241722	0.0221115	20.7946	0.00191	13.8055	0.663899	523.56	13.8055	0.084	15.5507	12.3	13.8055	1292	15.5507	0.00952012		18KH1-207	0	0	0	0	0	0	0	0	0	0	0	0	0	0	0	#DIV/0!	#DIV/0!
15	18KH1cr-79	75.2	151	2.00798	0.0766544	16.8377	0.00206	6.26286	0.371954	485.437	6.26286	0.27	15.6296	13.27	6.26286	3305	15.6296	0.00401513		18KH1cr-79	0.590717	10.1142	5.28017	24.5077	45.2703	2.48668	72.3618	73.9612	84.1463	74.5421	88.75	70.4453	70.8075	78.4553	1349.3	0.0434469	1.02195
12	18KH1c_487	239.2	278.9	1.16597	0.0108444	16.5368	0.001359	4.91304	0.297098	735.835	4.91304	0.0579	15.7901	8.75	4.91304	525	15.7901	0.0166667		18KH1c_487	-1.56118	18.9233	23.7069	41.5755	114.865	8.70337	72.3618	80.0554	58.1301	43.2234	40.625	42.5101	59.6273	81.7073	1462.6	0.0954639	1.21357
12	18KH1-101	272	71.3	0.262132	0.0531564	20.5171	0.00406	13.0128	0.634241	246.305	13.0128	0.095	15.8625	26.12	13.0128	1527	15.8625	0.0171054		18KH1-101	0	0	0	0	0	0	0	0	0	0	0	0	0	0	0	#DIV/0!	#DIV/0!
35	18KH1_74	83.44	66.64	0.798658	0.0202628	16.5325	0.001793	4.43545	0.268288	557.725	4.43545	0.082	15.9264	11.55	4.43545	1245	15.9264	0.00927711		18KH1_74	0	0	0	0	0	0	0	0	0	0	0	0	0	0	0	#DIV/0!	#DIV/0!
15	286R_80	88	55.7	0.632955	0.115635	17.4651	0.00304	6.9694	0.399046	328.947	6.9694	0.276	16.0143	19.57	6.9694	3340	16.0143	0.00585928		286R_80	4.09283	28.0587	82.9741	26.2582	43.2432	6.39432	54.2714	45.9834	59.3496	57.6923	70	67.6113	78.882	61.7886	1266.9	0.131993	0.688007
35	125_35	45.47	46.94	1.03233	0.0244379	16.545	0.00286	3.35865	0.203001	349.65	3.35865	0.062	16.2005	18.41	3.35865	673	16.2005	0.0273551		125_35	-7.21519	9.91843	2.92026	9.10284	30.5405	4.22735	46.7337	51.2465	52.0325	55.8608	55.1875	58.7045	70.1863	55.2846	1339	0.111896	0.665851
35	125_17	50.39	54.33	1.07819	0.0265402	16.7754	0.002638	2.98034	0.177662	379.075	2.98034	0.073	16.5085	16.98	2.98034	1013	16.5085	0.0167621		125_17	0.181435	10.9951	2.33836	8.59956	27.973	4.8135	55.2764	54.8476	54.4715	52.7473	50.375	53.0364	63.1056	47.9675	1424.49	0.122411	0.875935
15	286R_17	69.8	45.5	0.651862	0.100891	22.0588	0.00294	14.134	0.64074	340.136	14.134	0.249	16.9358	18.92	14.134	3178	16.9358	0.00595343		286R_17	-0.07173	8.18923	1.44397	19.6937	40.5405	4.26288	53.2663	66.205	89.4309	74.359	90	95.1417	113.665	104.065	1596.5	0.0917343	0.468627
15	18KH1cr-32	117	311.9	2.66581	0.047685	20.4259	0.00346	11.2209	0.549346	289.017	11.2209	0.1	17.0678	22.27	11.2209	1623	17.0678	0.0137215		18KH1cr-32	-0.199156	3.58891	3.23276	15.0985	57.4324	4.97336	77.3869	82.5485	58.9431	46.337	43.125	38.8664	44.0994	34.9593	1369.9	0.0745997	1.75483
35	125_40	55.28	58.3	1.05463	0.0261854	18.546	0.004	7.13109	0.384508	250	7.13109	0.0475	17.1202	25.73	7.13109	73.4	17.1202	0.350545		125_40	-5.86498	11.7129	4.22414	11.3786	40.8108	8.34813	68.3417	65.374	73.1707	70.3297	78.125	77.3279	87.1429	81.3008	1472.9	0.158073	0.784249
12	18KH1c_450	352	141.6	0.402273	0.00767371	20.8844	0.00096	11.6869	0.559599	1041.67	11.6869	0.058	17.3083	6.19	11.6869	529	17.3083	0.0117013		18KH1c_450	-0.0320675	5.15498	-1.50862	14.442	58.1081	6.57194	80.9045	106.925	83.7398	63.5531	52.5	59.5142	71.4286	55.6911	1678.9	0.0958492	1.13266
35	125_2	91.8	8.51	0.0927015	0.016676	20.1481	0.0011	10.2611	0.509282	909.091	10.2611	0.11	17.3395	7.09	10.2611	1799	17.3395	0.00394108		125_2	0.548523	5.0571	0.484914	6.12691	19.5946	1.08348	15.0754	34.349	63.8211	102.564	138.125	238.866	472.05	463.415	219.39	0.0630404	0.031936
12	18KH1c_350	409	28.1	0.0687042	0.00554582	17.806	0.000871	3.85996	0.216778	1148.11	3.85996	0.0462	17.3826	5.61	3.85996	6.99	17.3826	0.802575		18KH1c_350	0.016962	4.14356	0.571121	17.2867	45.2703	5.86146	68.3417	113.019	170.732	190.476	275.625	372.47	451.553	597.561	1411.1	0.105379	0.151348
35	125_76	57.1	354.4	6.20665	0.0171741	18.1679	0.001978	4.78516	0.263386	505.561	4.78516	0.063	17.5264	12.74	4.78516	707	17.5264	0.0180198		125_76	0.14346	6.99837	4.20259	6.98031	27.973	2.50444	37.6884	40.4432	40.2033	43.4066	40.6875	36.8421	50.3106	50.4065	1596.5	0.0771325	0.749116
12	18KH1c_156	240.2	80.6	0.335554	0.01094	21.7649	0.00126	12.905	0.592927	793.651	12.905	0.063	17.5264	8.12	12.905	707	17.5264	0.0114851		18KH1c_156	0.0229536	13.54	-10.7759	1.79431	18.9189	4.08526	86.9347	196.676	283.74	569.597	918.75	1323.89	1757.76	2093.5	1221.58	0.100734	0.0494575
15	18KH9r_86	397	112.6	0.283627	0.0174461	18.5028	0.000822	5.71444	0.308843	1216.55	5.71444	0.154	17.5982	5.3	5.71444	2390	17.5982	0.00221757		18KH9r_86	-0.0464135	30.9951	4.20259	20.1313	52.7027	13.8544	42.2111	61.2188	54.065	43.0403	43.125	41.2955	58.3851	54.4715	1390.5	0.293736	0.722977
15	286R_92	127.1	63.8	0.501967	0.0530213	21.9401	0.00458	12.6562	0.576852	218.341	12.6562	0.084	17.9217	29.46	12.6562	1292	17.9217	0.0228019		286R_92	0.0164557	5.66069	1.72414	8.53392	31.7568	3.37478	62.3116	67.036	80.4878	89.3773	120	111.336	142.236	154.472	1369.9	0.0758652	0.438086
12	18KH1c_417	478	24.5	0.0512552	0.00623946	18.2697	0.000851	3.54889	0.19425	1175.09	3.54889	0.0532	17.9217	5.484	3.54889	336	17.9217	0.0163214		18KH1c_417	0	1.28874	21.5517	4.37637	18.9189	2.30906	27.6382	117.729	249.593	406.593	737.5	1109.31	2428.57	2910.57	1503.8	0.100979	0.0113804
12	18KH1c_255	269	302	1.12268	0.0342667	19.6191	0.001237	7.86214	0.40074	808.407	7.86214	0.201	17.9748	7.97	7.86214	2834	17.9748	0.00281228		18KH1c_255	-0.0970464	24.4698	0.678879	1.53173	19.5946	7.1048	61.3065	95.2909	149.593	252.747	518.75	757.085	1217.39	2012.2	1122.7	0.204989	0.0503589
12	18KH1c_406	121.6	333	2.73849	0.0141236	19.3818	0.00168	6.93984	0.35806	595.238	6.93983	0.061	18.0967	10.82	6.93983	638	18.0967	0.0169592		18KH1c_406	-0.00590717	7.30832	6.03448	11.3786	56.0811	2.13144	36.6834	39.8892	29.6748	31.8681	29.375	21.0526	21.7391	24.3902	1245.27	0.0469926	1.68744
15	18KH1cr-15	103.7	178.3	1.71938	0.0317464	19.9632	0.00425	8.32406	0.41697	235.294	8.32406	0.0542	18.145	27.34	8.32406	378	18.145	0.072328		18KH1cr-15	0.092827	8.59706	3.98707	31.291	72.2973	1.24334	88.9447	97.2299	89.8374	104.396	74.375	96.3563	81.3665	57.7236	1254.54	0.0155049	1.09314
12	18KH1c_404	155.7	213.3	1.36994	0.0128253	18.8441	0.00141	4.71282	0.250095	709.22	4.71282	0.066	18.2452	9.08	4.71282	805	18.2452	0.0112795		18KH1c_404	-0.00548523	7.52039	19.7198	21.4442	37.1622	3.73002	57.2864	60.9418	43.9024	31.3187	28.75	26.7206	24.2236	28.0488	1277.2	0.0808415	2.3649
12	18KH1c_240	166.9	89.6	0.536848	0.0148992	19.9925	0.001188	6.95686	0.347973	841.751	6.95686	0.091	18.7431	7.65	6.95686	1446	18.7431	0.00529046		18KH1c_240	-1.81435	14.845	-409.483	8.75274	45.9459	3.73002	94.9749	122.715	149.187	217.949	415.625	510.121	850.932	1150.41	1261.75	0.0564655	0.111613
15	309-1_34	82.3	50.1	0.608748	0.0386579	20.0588	0.0015	7.05227	0.35158	666.667	7.05226	0.187	18.7782	9.66	7.05226	2715	18.7782	0.00355801		309-1_34	0	9.33116	2.47845	5.9081	33.1081	10.302	56.7839	53.7396	51.2195	44.3223	27.1875	25.5061	35.4037	30.4878	1081.5	0.237596	1.6039
15	18KH1cr-106	94.4	364	3.85593	0.183689	19.2863	0.003064	3.78228	0.196113	326.371	3.78228	0.435	18.9118	19.72	3.78228	4034	18.9118	0.00488845		18KH1cr-106	0.270042	7.38989	0.560345	13.1291	19.5946	2.84192	35.1759	34.349	34.5528	43.0403	34.375	31.5789	53.4161	36.5854	1287.5	0.108248	0.658525
12	18KH1-745	615	141.7	0.230407	0.00454783	19.3773	0.000642	4.12709	0.212986	1557.63	4.12709	0.0514	18.9327	4.137	4.12709	258	18.9327	0.0160349		18KH1-745	0	15.4976	11.7457	20.5689	49.3243	12.0782	76.3819	155.679	278.455	531.136	950	1518.22	2701.86	3902.44	1437.88	0.196777	0.0282701
12	18KH1-722	451	34.4	0.0762749	0.00685837	19.4407	0.000858	3.99247	0.205366	1165.5	3.99247	0.058	19.0263	5.53	3.99247	529	19.0263	0.0104537		18KH1-722	0.383966	15.8238	13.9009	30.6346	222.973	26.8206	344.221	322.161	324.797	432.234	625	1097.17	2037.27	2821.14	1572.81	0.0968108	0.168962
15	286R_58	210.9	87.8	0.416311	0.0303144	20.6814	0.00282	7.45582	0.360508	354.61	7.45582	0.078	19.2907	18.15	7.45582	1146	19.2907	0.0158377		286R_58	0.759494	2.80587	1.93966	5.68928	39.8649	1.36767	90.4523	65.097	71.5447	61.7216	56.25	51.0121	49.6894	48.7805	1400.8	0.022776	1.82035
35	125_16	81.8	367.3	4.49022	0.0133554	19.6854	0.001563	3.255	0.165351	639.795	3.255	0.062	19.4144	10.07	3.255	673	19.4144	0.0149629		125_16	0.0379747	6.7863	1.25	6.21444	32.2973	2.50444	48.0905	51.8006	55.6911	51.6484	58.0625	58.7045	67.6398	57.3171	1648	0.0635475	0.710979
35	125_33	60.67	63.5	1.04665	0.0226937	19.8076	0.002287	3.45621	0.174489	437.254	3.45621	0.072	19.5038	14.73	3.45621	985	19.5038	0.0149543		125_33	-7.59494	13.9152	4.57974	15.1204	59.4595	8.17052	83.9196	77.5623	76.0163	75.2747	72.5	74.0891	81.9876	69.9187	1493.5	0.115666	1.02356
12	18KH1c_203	160	205.3	1.28313	0.0163728	22.7659	0.00165	11.7426	0.515798	606.061	11.7426	0.072	19.5038	10.63	11.7426	985	19.5038	0.0107919		18KH1c_203	0.0227426	40.2936	-171.336	6.12691	49.3243	20.9591	153.769	310.249	536.585	994.505	1662.5	2129.55	3440.99	4186.99	919.79	0.240663	0.0446873
12	18KH1c_268	225.5	211.3	0.937029	0.0246088	23.4985	0.00248	13.1066	0.557763	403.226	13.1066	0.072	19.5038	15.97	13.1066	985	19.5038	0.0162132		18KH1c_268	-0.07173	64.2741	2.69397	28.2276	64.8649	8.52575	197.487	412.742	861.789	1529.3	2343.75	3161.94	4000	4252.03	1137.12	0.0753283	0.0493719
12	18KH1-401	401	895	2.23192	0.0217863	21.3615	0.00208	8.0288	0.375853	480.769	8.0288	0.076	19.7953	13.39	8.0288	1094	19.7953	0.0122395		18KH1-401	0	31.1582	4.20259	8.97155	44.5946	14.5648	153.769	216.066	410.569	659.341	1087.5	1372.47	2086.96	2735.77	1081.5	0.175886	0.0736809
35	125_11	36.76	32.85	0.893634	0.028048	20.3383	0.003131	3.3672	0.165559	319.387	3.3672	0.065	20.0577	20.15	3.3672	773	20.0577	0.0260673		125_11	0.172996	6.88418	1.43319	6.30197	21.8919	3.5524	38.8442	42.6593	47.8049	48.5348	51.75	51.417	60.7453	56.9106	1405.95	0.121819	0.63946
35	125_39	39.79	38.79	0.974868	0.0291692	20.3497	0.002822	3.43505	0.168801	354.359	3.43505	0.075	20.0577	18.17	3.43505	1068	20.0577	0.0170131		125_39	-8.86076	8.85808	2.98491	7.78993	32.8378	5.50622	49.7487	47.0914	56.0976	51.4652	59.8125	56.6802	68.5714	57.7236	1255.57	0.136231	0.725503
12	18KH1-639	220.3	63	0.285974	0.0139961	20.9299	0.001069	5.97924	0.285679	935.454	5.97924	0.095	20.0577	6.89	5.97924	1527	20.0577	0.00451212		18KH1-639	0	2.31648	2.47845	3.71991	30.4054	0	74.8744	70.0831	71.9512	57.1429	34.375	52.6316	73.913	60.9756	1349.3	0	1.01301
15	18KH1cr-126a	83.5	334.3	4.00359	0.0618748	21.1335	0.00184	6.40544	0.303094	543.478	6.40544	0.244	20.1394	11.85	6.40544	3146	20.1394	0.00376669		18KH1cr-126a	0	7.61827	2.69397	18.1619	32.4324	0	50.7538	47.6454	50.813	47.2527	54.375	44.5344	50.3106	56.0976	1380.2	0	1.00881
15	286R_46	112.2	29.5	0.262923	0.035903	22.8996	0.00239	10.7101	0.4677	418.41	10.7101	0.109	20.2406	15.39	10.7101	1782	20.2406	0.00863636		286R_46	-0.0759494	3.78467	0.12931	4.66083	32.4324	8.17052	69.8492	90.3047	103.252	104.945	128.125	144.13	134.783	137.805	1266.9	0.171664	0.518236
12	18KH1-640	250	143	0.572	0.0154058	20.9102	0.001256	5.08777	0.243316	796.178	5.08777	0.089	20.2818	8.09	5.08777	1403	20.2818	0.00576622		18KH1-640	0	2.4633	6.46552	5.20788	75.6757	5.3286	100.503	71.4681	71.5447	63.0037	36.875	38.4615	40.3727	41.4634	1240.12	0.0611007	2.48937
15	18KH9r_67	445	348	0.782022	0.010665	21.3221	0.00165	6.48236	0.304021	606.061	6.48236	0.0469	20.3128	10.63	6.48236	43.1	20.3128	0.246636		18KH9r_67	-0.0548523	27.5693	6.03448	19.0372	77.027	9.59147	39.6985	69.2521	58.5366	61.1722	55	62.753	86.9565	96.748	1565.6	0.173451	0.456533
15	18KH1cr-63	90.3	310.2	3.43522	0.0290245	22.1104	0.0027	8.11072	0.366828	370.37	8.11072	0.078	20.5691	17.38	8.11072	1146	20.5691	0.0151658		18KH1cr-63	-0.0907173	9.1354	2.15517	33.4792	65.5405	6.03908	103.015	111.08	147.561	206.96	240	274.899	381.366	341.463	1339	0.0734962	0.270121
15	286R_97	105.6	54.2	0.513258	0.0437228	21.5407	0.00225	6.21874	0.288698	444.444	6.21874	0.141	20.6235	14.49	6.21874	2239	20.6235	0.00647164		286R_97	0.0548523	5.75856	3.98707	6.78337	25	6.03908	54.7739	64.8199	72.3577	56.5934	73.75	76.1134	105.59	110.976	1349.3	0.163198	0.518741
15	286R_13	153.1	40.3	0.263227	0.0248238	22.5499	0.00237	7.93556	0.351911	421.941	7.93556	0.076	21.1074	15.26	7.93556	1094	21.1074	0.0139488		286R_13	-0.0109705	3.18108	0.409483	14.442	32.4324	5.3286	69.8492	74.7922	84.1463	77.1062	85	94.7368	99.3789	98.374	1153.6	0.111955	0.702858
12	18KH1c_478	130.5	61.8	0.473563	0.018327	24.1771	0.00122	11.7036	0.484078	819.672	11.7036	0.109	21.1556	7.86	11.7036	1782	21.1556	0.00441077		18KH1c_478	-0.105485	13.0506	120.69	9.62801	53.3784	17.0515	86.4322	165.374	343.089	613.553	993.75	1574.9	2478.26	4272.36	1278.23	0.25104	0.0348761
35	18KH1_27	121.4	8.43	0.0694399	0.0108143	21.6762	0.001509	4.47921	0.206641	662.691	4.47921	0.052	21.2084	9.72	4.47921	284	21.2084	0.0342254		18KH1_27	0	0	0	0	0	0	0	0	0	0	0	0	0	0	0	#DIV/0!	#DIV/0!
12	18KH1c_388	576	364	0.631944	0.00527457	23.5834	0.000736	10.3141	0.437345	1358.7	10.3141	0.052	21.2084	4.74	10.3141	284	21.2084	0.0166901		18KH1c_388	-0.00590717	28.2219	1.50862	9.84683	47.973	4.61812	133.668	274.792	536.585	994.505	1868.75	2437.25	3322.98	4215.45	1134.03	0.0576703	0.0402254
12	18KH1-635	652	93.5	0.143405	0.00864119	24.3234	0.00095	11.8052	0.485343	1052.63	11.8052	0.066	21.2665	6.12	11.8052	805	21.2665	0.00760248		18KH1-635	-0.379747	5.07341	7.65086	2.38512	34.4595	14.032	66.3317	78.3934	164.228	300.366	452.5	975.709	1447.2	2512.2	1194.8	0.293497	0.0458343
12	18KH1c_448	295	396.4	1.34373	0.00550324	21.8486	0.000944	4.72844	0.216418	1059.32	4.72844	0.0423	21.3308	6.08	4.72844	0.0001	21.3308	60800		18KH1c_448	-0.0122363	5.15498	-6.03448	29.1028	114.865	10.1243	81.407	65.651	92.6829	87.9121	62.5	64.7773	87.5776	95.935	1545	0.104699	0.929541
12	18KH1c_458	121.7	87	0.714873	0.0109747	22.6992	0.001422	7.33211	0.323012	703.235	7.33211	0.056	21.4824	9.16	7.33211	451	21.4824	0.0203104		18KH1c_458	-0.0514768	12.5612	-0.409483	6.34573	48.6486	3.73002	96.4824	193.906	325.61	549.451	718.75	931.174	1211.18	1406.5	978.5	0.0544442	0.0796598
15	286R_62	230.6	73.9	0.320468	0.0185792	22.0293	0.002074	4.36734	0.198251	482.16	4.36734	0.065	21.592	13.36	4.36734	773	21.592	0.0172833		286R_62	0.101266	1.40294	2.15517	3.80744	39.1892	11.1901	101.508	111.357	77.6423	58.4249	47.5	56.6802	47.8261	59.7561	1267.93	0.177419	2.12243
15	286R_67	197	71.9	0.364975	0.0189017	22.3312	0.00211	5.69809	0.255162	473.934	5.69809	0.065	21.592	13.59	5.69809	773	21.592	0.0175809		286R_67	0.0801688	2.12072	6.35776	6.17068	33.7838	0.337478	72.3618	58.1717	60.5691	43.2234	34.375	38.8664	31.677	36.1789	1369.9	0.00682553	2.28436
12	18KH1c_330	239	283.6	1.18661	0.00642425	23.4807	0.000914	9.15574	0.389926	1094.09	9.15574	0.051	21.6221	5.89	9.15574	240	21.6221	0.0245417		18KH1c_330	-0.042616	4.89396	2.69397	18.5996	35.8108	0.017762	50.2513	47.6454	47.1545	71.4286	112.5	178.138	341.615	369.919	896.1	0.000418708	0.147099
35	125_22	62.5	444.4	7.1104	0.0177827	22.5563	0.00187	5.82123	0.258076	534.759	5.82123	0.069	21.7922	12.04	5.82123	898	21.7922	0.0134076		125_22	-12.2363	6.0522	1.68103	6.12691	28.5811	2.43339	43.7186	44.0443	47.9675	49.4505	52.75	57.8947	67.0186	58.5366	1823.1	0.0688398	0.652335
15	18KH1cr-179	159.5	343.6	2.15423	0.0145536	24.1156	0.00192	10.1596	0.421288	520.833	10.1596	0.055	21.8711	12.37	10.1596	411	21.8711	0.0300973		18KH1cr-179	0	6.19902	2.15517	12.6915	48.6486	3.01954	59.799	81.4404	86.5854	141.026	165	193.927	234.161	282.114	1833.4	0.0559833	0.255375
15	286R_55	156.8	78.2	0.498724	0.0326353	25.0506	0.0037	12.1123	0.483512	270.27	12.1123	0.064	21.9277	23.81	12.1123	741	21.9277	0.0321323		286R_55	-0.464135	1.69657	0.818966	7.43982	35.1351	7.28242	67.3367	71.1911	78.4553	44.3223	60	36.0324	57.764	30.8943	1442	0.14972	1.16572
15	286R_8	187	82.8	0.442781	0.0204908	23.3262	0.00252	7.50403	0.321699	396.825	7.50403	0.059	22.0863	16.22	7.50403	566	22.0863	0.0286572		286R_8	-0.0801688	3.03426	0.517241	12.035	37.8378	7.46004	78.8945	100	100.813	104.579	115	118.219	144.72	165.041	1328.7	0.136538	0.545151
15	18KH1cr-25	109.5	131.9	1.20457	0.0307362	26.1216	0.00378	13.9476	0.533948	264.55	13.9476	0.059	22.0863	24.32	13.9476	566	22.0863	0.0429682		18KH1cr-25	0	8.72757	3.34052	39.1685	77.027	3.5524	81.9095	87.5346	67.4797	92.4908	88.125	107.287	121.739	162.602	1318.4	0.0447232	0.672828
12	18KH1c_421	926	666	0.719222	0.00430158	22.7434	0.000578	4.59612	0.202086	1730.1	4.59612	0.054	22.2741	3.725	4.59612	370	22.2741	0.0100676		18KH1c_421	-0.00759494	27.8956	42.0259	7.65864	45.2703	28.5968	74.8744	117.452	216.667	338.828	561.25	805.668	1397.52	1739.84	1102.1	0.491184	0.0535768
12	18KH1c_333	602.2	315.5	0.523912	0.00378173	23.2434	0.00056	5.83001	0.250824	1785.71	5.83001	0.049	22.5004	3.61	5.83001	147	22.5004	0.0245578		18KH1c_333	-0.0552743	14.3556	1.31466	11.5974	31.0811	6.57194	132.161	246.537	499.187	822.344	1475	2530.36	2795.03	3455.28	1194.8	0.10254	0.0472842
12	18KH1c_428	265.5	162.5	0.612053	0.00630063	23.3464	0.000933	6.22803	0.266766	1071.81	6.22804	0.049	22.5004	6.01	6.22804	147	22.5004	0.0408844		18KH1c_428	-0.0253165	40.4568	-53.8793	12.4726	39.1892	5.68384	113.568	182.825	455.285	754.579	1075	1485.83	2211.18	3040.65	1215.4	0.0851983	0.0513607
35	125_13	62.7	82.4	1.31419	0.0156678	22.9422	0.002145	3.37567	0.147138	466.2	3.37567	0.053	22.6925	13.81	3.37567	328	22.6925	0.0421037		125_13	0.489451	11.9739	3.26509	11.7505	43.3784	8.20604	76.8844	72.0222	71.5447	69.9634	69	75.7085	81.1801	72.7642	1362.69	0.142095	0.947084
12	18KH1c_49	156.4	105	0.671355	0.0124519	23.4185	0.00139	3.6839	0.157307	719.424	3.6839	0.065	23.1269	8.95	3.6839	773	23.1269	0.0115783		18KH1c_49	-4.00844	7.84666	-204.741	9.45295	89.1892	19.1829	124.623	90.5817	53.252	47.4359	41.875	45.749	42.236	61.7886	1245.27	0.181953	2.95064
12	18KH1-767	280	110.3	0.393929	0.0131685	24.1858	0.001225	7.07799	0.292651	816.327	7.07799	0.078	23.1269	7.89	7.07799	1146	23.1269	0.00688482		18KH1-767	0.0886076	40.1305	2.26293	3.6105	22.973	12.9663	68.3417	136.288	238.618	419.414	683.125	1089.07	1757.76	2260.16	1049.57	0.327237	0.0388799
12	18KH1c_413	204.6	212.3	1.03763	0.00875199	24.4702	0.001134	7.58801	0.310092	881.834	7.58801	0.056	23.264	7.31	7.58801	451	23.264	0.0162084		18KH1c_413	-0.0248945	8.66232	38.7931	17.5055	93.9189	5.86146	112.563	93.9058	85.7724	65.2015	63.125	55.0607	85.7143	87.8049	1462.6	0.0570074	1.31323
15	18KH1cr-86	98.3	364.9	3.71211	0.0265599	24.0199	0.001449	5.601	0.233181	690.131	5.601	0.133	23.3578	9.33	5.601	2137	23.3578	0.00436593		18KH1cr-86	0.248945	10.8809	3.34052	17.9431	39.8649	4.61812	61.3065	68.9751	50.4065	57.6923	60	76.9231	68.323	54.4715	1266.9	0.093415	0.897305
12	18KH1c_387	275	138.4	0.503273	0.00839698	24.7762	0.000896	7.61034	0.307163	1116.07	7.61034	0.068	23.5785	5.77	7.61034	868	23.5785	0.00664747		18KH1c_387	0.00459916	8.22186	1.8319	12.6915	62.1622	4.61812	163.317	301.939	467.48	771.062	1337.5	1497.98	2192.55	3109.76	1126.82	0.0458339	0.0744872
12	18KH1c_120	163.7	115.6	0.70617	0.012558	25.5999	0.00134	9.9704	0.389471	746.269	9.9704	0.068	23.5785	8.63	9.9704	868	23.5785	0.0099424		18KH1c_120	-0.421941	17.9445	-93.75	3.76368	39.8649	23.0906	125.126	191.136	259.756	437.729	588.75	842.105	1335.4	1560.98	1020.73	0.326939	0.0936987
15	18KH1cr-175b	84.4	302.7	3.58649	0.0713787	25.9152	0.00249	10.6921	0.41258	401.606	10.6921	0.208	23.6067	16.03	10.6921	2889	23.6067	0.00554863		18KH1cr-175b	-0.183544	5.90538	5.06466	24.07	37.1622	2.30906	52.2613	55.1247	60.9756	62.2711	73.75	61.5385	60.2484	81.7073	1369.9	0.0523955	0.86743
15	18KH1cr-127	191.7	435.1	2.26969	0.0112781	24.6442	0.001387	6.47827	0.262872	720.981	6.47827	0.059	23.7774	8.93	6.47827	566	23.7774	0.0157774		18KH1cr-127	-0.0877637	7.99347	4.31034	31.9475	62.8378	0	90.4523	118.837	162.602	203.297	232.5	279.352	323.602	373.984	1668.6	0	0.279517
12	18KH1c_7	328	320.7	0.977744	0.0111908	27.2591	0.00116	12.2862	0.450719	862.069	12.2862	0.07	24.3332	7.47	12.2862	927	24.3332	0.00805825		18KH1c_7	-2.40506	4.15987	-81.8966	9.19037	60.8108	5.86146	86.9347	74.5152	78.8618	72.5275	83.125	84.6154	92.5466	92.2764	1369.9	0.0806155	0.939361
15	286R_32	123.2	6.6	0.0535714	0.0259925	28.6533	0.0046	14.9605	0.522121	217.391	14.9605	0.041	24.4376	29.59	14.9605	0.0001	24.4376	295900		286R_32	0	1.33768	0.075431	3.01969	20.9459	17.4067	100.503	161.496	240.244	239.927	208.125	230.769	259.627	235.366	1268.96	0.379384	0.387103
12	18KH1c_468	188.2	186.5	0.990967	0.00700184	25.2049	0.001129	5.95378	0.236215	885.74	5.95378	0.045	24.4917	7.27	5.95378	0.0001	24.4917	72700		18KH1c_468	-0.0109705	8.66232	-4.84914	19.6937	144.595	7.81528	95.4774	92.2438	66.6667	78.3883	86.875	66.8016	89.441	65.0407	1339	0.0665148	1.06749
12	18KH1c_55	421	35.6	0.0845606	0.00580765	25.0172	0.00086	4.87852	0.195007	1162.79	4.87852	0.049	24.5369	5.54	4.87852	147	24.5369	0.0376871		18KH1c_55	0.0211814	7.38989	-185.345	7.65864	48.6486	4.97336	102.01	148.753	200	344.322	506.25	975.709	1726.71	2065.04	1252.48	0.0705981	0.0590778
12	18KH1c_461	235.4	226.8	0.963466	0.0073774	24.8981	0.00101	3.99568	0.160481	990.099	3.99568	0.053	24.5754	6.51	3.99568	328	24.5754	0.0198476		18KH1c_461	-0.0675105	5.90538	-2.69397	12.4726	81.7568	2.84192	70.8543	84.4875	71.9512	68.315	65	79.7571	73.2919	72.3577	1380.2	0.0373393	0.96674
12	18KH1c_58	417	181	0.434053	0.00661444	25.2869	0.000842	5.81832	0.230092	1187.65	5.81832	0.057	24.6084	5.43	5.81832	491	24.6084	0.0110591		18KH1c_58	-5.48523	5.677	-95.9052	7.65864	102.703	14.032	143.719	126.039	110.976	95.0549	115	151.012	142.236	172.358	1210.25	0.115497	1.01042
15	286R_87	75.7	74.2	0.980185	0.0542121	25.7093	0.00264	6.48236	0.25214	378.788	6.48236	0.149	24.8787	17	6.48236	2334	24.8787	0.00728363		286R_87	0.223629	7.7814	6.68103	6.12691	43.9189	3.73002	73.3668	74.2382	97.1545	110.073	117.5	127.935	138.509	154.065	1503.8	0.0657106	0.529689
15	18KH1cr-81	120.4	380.7	3.16196	0.0233271	26.3678	0.00186	7.35796	0.279051	537.634	7.35796	0.091	25.3204	11.98	7.35796	1446	25.3204	0.00828492		18KH1cr-81	0	6.99837	2.37069	10.7221	18.9189	-0.920071	31.6583	40.4432	29.6748	28.9377	39.375	40.081	37.2671	40.2439	1205.1	-0.0375949	0.849497
15	18KH1cr-168	315.8	218	0.69031	0.00717825	25.9325	0.000947	4.717	0.181896	1055.97	4.71701	0.055	25.4999	6.1	4.71701	411	25.4999	0.0148418		18KH1cr-168	0.379747	27.7325	9.91379	63.0197	264.189	53.1083	267.337	157.341	133.74	133.7	135.625	131.984	126.708	121.951	1318.4	0.199837	2.10986
15	18KH1cr-24a	39.8	170	4.27136	0.103412	27.1135	0.00215	8.2347	0.303713	465.116	8.2347	0.349	25.8327	13.84	8.2347	3702	25.8327	0.00373852		18KH1cr-24a	3.41772	15.1713	3.98707	35.8862	40.5405	4.61812	55.2764	48.4765	52.8455	58.7912	45.625	55.4656	37.2671	45.122	1206.13	0.0975552	1.48325
12	18KH1c_57	133.3	471.1	3.53413	0.0172438	27.2433	0.00272	7.70427	0.282795	367.647	7.70427	0.046	26.1312	17.51	7.70427	0.0001	26.1312	175100		18KH1c_57	-1.64557	6.15008	-169.181	11.3786	39.1892	2.48668	82.4121	71.4681	72.3577	68.8645	68.75	70.8502	99.3789	102.033	1617.1	0.0437564	0.829271
12	18KH1-680	235.9	152	0.644341	0.0149615	27.8394	0.00118	9.60158	0.344892	847.458	9.60158	0.092	26.1312	7.6	9.60158	1467	26.1312	0.00518064		18KH1-680	0	36.8679	2.15517	6.56455	29.0541	5.3286	97.9899	168.975	267.073	571.429	781.25	1141.7	1639.75	2113.82	1184.5	0.0998662	0.059759
12	18KH1c_62	162.6	58.3	0.358549	0.0102213	27.2863	0.001141	7.62927	0.279601	876.424	7.62927	0.065	26.198	7.35	7.62927	773	26.198	0.00950841		18KH1c_62	-0.379747	6.60685	-50.6466	5.22976	31.0811	1.0302	71.8593	63.7119	97.561	157.509	256.875	396.761	677.019	772.358	1339	0.0217987	0.106141
15	18KH1cr-159	140	31.6	0.225714	0.0244269	28.8778	0.00422	12.0695	0.417952	236.967	12.0695	0.042	26.2345	27.15	12.0695	0.0001	26.2345	271500		18KH1cr-159	0.126582	10.2773	5.06466	24.07	36.4865	4.08526	62.3116	46.5374	59.7561	46.1538	55.625	48.583	46.5839	72.3577	1174.2	0.085678	1.33762
15	18KH1cr-27	99.3	159.8	1.60926	0.0271879	26.7269	0.001617	4.90207	0.183413	618.429	4.90207	0.122	26.2735	10.42	4.90207	1985	26.2735	0.00524937		18KH1cr-27	0.0970464	8.15661	2.58621	28.4464	45.2703	6.03908	69.3467	65.651	87.8049	97.619	116.25	125.911	124.845	126.829	1287.5	0.107783	0.555464
15	18KH1cr-162	124	397	3.20161	0.0240906	27.5929	0.0023	8.15706	0.295622	434.783	8.15706	0.076	26.3597	14.81	8.15706	1094	26.3597	0.0135375		18KH1cr-162	0	5.13866	3.44828	30.8534	60.8108	2.30906	103.518	127.424	132.114	139.194	143.75	157.895	163.354	178.862	1565.6	0.029103	0.633701
12	18KH1c_457	203.4	179.2	0.881023	0.00989809	29.3491	0.00126	12.905	0.439707	793.651	12.905	0.057	26.3597	8.12	12.905	491	26.3597	0.0165377		18KH1c_457	-0.0177215	1.95759	-2.37069	11.1597	86.4865	4.26288	80.402	81.7175	78.4553	75.2747	91.875	93.9271	95.0311	80.8943	1274.11	0.0511205	0.84606
12	18KH1c_380	216.4	146.7	0.677911	0.00858992	27.76	0.001176	8.39928	0.302568	850.34	8.39928	0.053	26.4588	7.58	8.39928	328	26.4588	0.0231098		18KH1c_380	-0.057384	16.8026	2.90948	17.5055	77.7027	11.7229	156.784	326.87	569.106	987.179	1731.25	2198.38	2975.16	3621.95	1205.1	0.10621	0.0526977
15	18KH9r_93	322	112	0.347826	0.0110549	27.6732	0.000922	8.03679	0.290418	1084.6	8.03679	0.087	26.4804	5.94	8.03679	1360	26.4804	0.00436765		18KH9r_93	0	24.4698	1.35776	13.7856	54.7297	2.84192	36.1809	33.795	51.626	45.7875	40	59.1093	63.354	53.6585	1472.9	0.0638646	0.571091
15	286R_63	254.3	27.5	0.10814	0.196528	29.159	0.0092	12.1757	0.417564	108.696	12.1757	0.155	26.4952	59.04	12.1757	2401	26.4952	0.0245898		286R_63	13.0802	14.6819	15.625	10.2845	25	8.52575	59.799	80.8864	116.667	117.216	250.625	408.907	795.031	1223.58	1163.9	0.220504	0.0752159
12	18KH1c_375	226.9	75.1	0.330983	0.00844383	27.099	0.000901	5.5996	0.206635	1109.88	5.5996	0.068	26.5142	5.81	5.5996	868	26.5142	0.00669355		18KH1c_375	-0.00337553	2.47961	0.560345	8.75274	62.8378	2.48668	82.9146	98.892	98.7805	64.8352	65.625	52.2267	58.3851	62.6016	1328.7	0.0344503	1.42013
15	18KH1cr-20	69.6	153.4	2.20402	0.0584665	27.3025	0.00179	6.04152	0.221281	558.659	6.04152	0.237	26.6257	11.53	6.04152	3099	26.6257	0.00372056		18KH1cr-20	0	11.2235	1.14224	27.7899	43.2432	0	73.8693	66.482	55.6911	45.4212	43.75	35.2227	49.0683	57.7236	1370.93	0	1.50544
15	286R_52	42.9	81	1.88811	0.0913279	28.3476	0.00333	9.58923	0.338272	300.3	9.58922	0.199	26.6765	21.43	9.58922	2817	26.6765	0.00760738		286R_52	0	8.646	2.47845	10.7221	25.6757	3.01954	21.1055	49.0305	58.5366	54.5788	60	48.1781	54.0373	36.1789	1508.95	0.129712	0.390574
15	18KH1cr-102	80.3	316.7	3.94396	0.0253675	27.2853	0.001753	5.57369	0.204275	570.451	5.57369	0.105	26.71	11.29	5.57369	1713	26.71	0.00659078		18KH1cr-102	0	5.98695	0.721983	20.1313	44.5946	0	60.3015	59.2798	65.8537	91.0256	113.125	128.745	150.932	178.862	1400.8	0	0.399529
12	18KH1c_300	285.4	74.1	0.259636	0.00627623	27.4999	0.001012	6.54399	0.237964	988.142	6.54399	0.045	26.71	6.52	6.54399	0.0001	26.71	65200		18KH1c_300	-0.00801688	6.57423	2.47845	30.8534	66.2162	11.0124	135.176	91.9668	78.4553	50.7326	41.875	50.2024	48.4472	49.187	1236	0.1164	2.79017
15	286R_28	205.1	138	0.672843	0.016042	27.7631	0.00194	7.57415	0.272814	515.464	7.57415	0.06	26.71	12.49	7.57415	603	26.71	0.0207131		286R_28	-0.0135021	6.75367	1.18534	30.8534	33.1081	1.93606	65.8291	70.0831	78.0488	73.4432	72.5	85.0202	93.1677	86.9919	1514.1	0.0414707	0.706566
15	18KH1cr-131	102.1	6.7	0.0656219	0.0154996	27.1095	0.001584	4.06023	0.149772	631.313	4.06023	0.071	26.8037	10.2	4.06023	956	26.8037	0.0106695		18KH1cr-131	0	9.6248	1.18534	17.2867	33.7838	1.06572	58.2915	61.7729	81.7073	78.7546	95.625	96.3563	122.36	119.919	1318.4	0.0240152	0.476392
12	18KH1c_160	490	138.9	0.283469	0.00327166	27.7173	0.000579	6.79163	0.245033	1727.12	6.79164	0.041	26.8723	3.73	6.79164	0.0001	26.8723	37300		18KH1c_160	0.021097	19.2496	-91.5948	2.66958	31.4189	6.2167	116.583	249.584	450.813	761.905	1300	1991.9	2751.55	3491.87	1093.86	0.102718	0.0423699
35	125_27	55.8	402.3	7.20968	0.0151684	27.2521	0.001747	3.49616	0.12829	572.41	3.49616	0.063	27.0269	11.25	3.49616	707	27.0269	0.0159123		125_27	-3.96624	5.88907	1.54095	6.21444	24.4595	2.1492	34.9246	32.687	37.2358	32.6007	30.5	28.0567	39.441	34.9593	1555.3	0.0735339	0.88549
12	18KH1c_238	334	128.7	0.385329	0.00566928	27.405	0.000857	3.90074	0.142337	1166.86	3.90074	0.048	27.126	5.52	3.90074	98.2	27.126	0.0562118		18KH1c_238	-1.4346	33.6052	-398.707	9.40919	52.027	21.3144	147.739	236.288	460.163	703.297	1256.25	1558.7	2459.63	2983.74	1225.7	0.243115	0.0600655
15	18KH1cr-22	78.7	310	3.93901	0.0467831	28.2107	0.001664	6.3226	0.224121	600.962	6.3226	0.204	27.493	10.72	6.3226	2858	27.493	0.00375087		18KH1cr-22	0.506329	6.96574	1.8319	12.4726	36.4865	0	48.7437	45.7064	55.2846	63.9194	53.125	62.3482	68.9441	78.4553	1412.13	0	0.707003
12	18KH1c_237	302	197.9	0.655298	0.00491183	27.8159	0.000891	3.8943	0.140002	1122.33	3.8943	0.04	27.542	5.74	3.8943	0.0001	27.542	57400		18KH1c_237	-1.09705	27.0799	-140.086	5.25164	35.8108	18.1172	140.704	245.152	439.024	659.341	1193.75	1327.94	2173.91	2426.83	948.63	0.25523	0.0647236
12	18KH1c_324	100.6	234	2.32604	0.0125359	28.2229	0.001137	6.16213	0.218338	879.508	6.16212	0.08	27.542	7.33	6.16212	1196	27.542	0.00612876		18KH1c_324	0	5.35073	2.02586	14.2232	46.6216	4.79574	62.3116	50.4155	57.7236	47.2527	48.125	56.6802	39.1304	52.439	1301.92	0.0889769	1.59241
15	18KH1cr-18	100	354.5	3.545	0.0168266	28.3353	0.001471	5.71755	0.201781	679.81	5.71755	0.083	27.7525	9.48	5.71755	1268	27.7525	0.00747634		18KH1cr-18	0	8.97227	2.90948	15.7549	28.3784	0.674956	41.206	29.3629	41.8699	54.3956	30	49.3927	63.9752	62.6016	1452.3	0.0197379	0.644094
12	18KH1c_289	81.5	328.2	4.02699	0.0144477	28.6982	0.001456	7.04794	0.245588	686.813	7.04794	0.072	27.8193	9.38	7.04794	985	27.8193	0.00952284		18KH1c_289	-0.0392405	6.11746	1.00216	13.7856	31.7568	0.692718	44.7236	73.1302	112.602	157.509	300	331.984	627.329	646.341	1297.8	0.018381	0.0712921
12	18KH1c_265	154	305	1.98052	0.0216943	29.224	0.001149	6.43061	0.220045	870.322	6.43061	0.137	28.5077	7.4	6.43061	2189	28.5077	0.00338054		18KH1c_265	0.0130802	6.88418	3.125	26.477	133.108	6.92718	110.553	86.1496	69.1057	62.2711	55.625	37.247	46.5839	45.935	1357.54	0.0571043	2.3732
35	286_5	305	45.7	0.149836	0.11924	30.621	0.0042	10.7257	0.350273	238.095	10.7257	0.206	28.6811	27.02	10.7257	2874	28.6811	0.00940153		286_5	0	0	0	0	0	0	0	0	0	0	0	0	0	0	0	#DIV/0!	#DIV/0!
15	18KH9r_82	130.3	89.3	0.685342	0.027321	30.1209	0.00336	8.64491	0.287007	297.619	8.64491	0.059	28.8536	21.62	8.64491	566	28.8536	0.0381979		18KH9r_82	0	12.8874	3.01724	14.2232	39.8649	11.0124	41.7085	44.8753	41.4634	42.4908	48.75	55.0607	56.5217	58.5366	1308.1	0.27007	0.73792
12	18KH1c_416	275.6	33.8	0.122642	0.00539557	29.4189	0.00087	5.34748	0.18177	1149.42	5.34749	0.045	28.9288	5.61	5.34749	0.0001	28.9288	56100		18KH1c_416	0	5.04078	16.9181	7.43982	29.7297	17.4067	58.2915	113.019	238.211	452.381	850	1348.18	2565.22	3487.8	1277.2	0.418138	0.0227238
12	18KH1c_262	453	21.3	0.0470199	0.00517851	29.6075	0.000835	6.3029	0.212882	1197.61	6.3029	0.045	28.9288	5.38	6.3029	0.0001	28.9288	53800		18KH1c_262	-0.101266	5.12235	2.26293	9.19037	23.6486	3.19716	49.2462	90.3047	143.089	347.985	606.25	1048.58	1987.58	2691.06	1393.59	0.0936859	0.024777
15	286R_54	48.8	47.4	0.971311	0.0760921	29.7941	0.00321	6.35017	0.213135	311.526	6.35016	0.172	29.1095	20.66	6.35016	2576	29.1095	0.00802019		286R_54	1.09705	7.83034	5.06466	13.1291	33.1081	4.4405	57.7889	72.5762	70.7317	71.4286	54.375	86.6397	96.2733	80.0813	1781.9	0.101518	0.600259
15	18KH1cr-165	120.9	4.32	0.035732	0.0172066	30.928	0.00227	10.3899	0.335939	440.529	10.3899	0.055	29.1306	14.62	10.3899	411	29.1306	0.0355718		18KH1cr-165	0	6.19902	2.37069	18.5996	50	2.84192	93.4673	95.2909	73.1707	95.2381	72.5	74.4939	79.5031	86.5854	1339	0.0415716	1.17564
12	18KH1c_485	405	42.6	0.105185	0.00392147	29.5251	0.000694	3.57565	0.121106	1440.92	3.57565	0.041	29.3077	4.472	3.57565	0.0001	29.3077	44720		18KH1c_485	-0.0590717	17.7814	17.1336	35.2298	71.6216	5.68384	66.3317	134.903	176.829	247.253	316.25	433.198	621.118	804.878	1328.7	0.082463	0.106794
15	18KH1cr-74	64	25.7	0.401562	0.026275	31.0869	0.00465	10.3659	0.333449	215.054	10.3659	0.041	29.3077	29.91	10.3659	0.0001	29.3077	299100		18KH1cr-74	0.101266	9.78793	3.23276	29.3217	58.1081	6.92718	94.4724	83.3795	78.8618	95.2381	59.375	77.3279	81.9876	78.0488	1308.1	0.0934944	1.15228
15	18KH1r_MR1_2	152.6	15.2	0.0996068	0.017984	29.9898	0.001611	4.37734	0.145961	620.732	4.37734	0.081	29.6686	10.38	4.37734	1221	29.6686	0.00850123		18KH1r_MR1_2	0.0253165	11.8597	5.28017	20.1313	63.5135	2.48668	76.3819	60.1108	51.626	52.5641	50	55.0607	55.9006	50.813	1266.9	0.0357019	1.36639
12	18KH1-278	400.9	39.8	0.0992766	0.00995377	30.2112	0.000976	5.15249	0.170549	1024.59	5.15249	0.074	29.7686	6.29	5.15249	1041	29.7686	0.00604227		18KH1-278	0	0	0	0	0	0	0	0	0	0	0	0	0	0	0	#DIV/0!	#DIV/0!
15	18KH1cr-62	99.1	96.9	0.9778	0.0387613	30.8557	0.00125	7.9404	0.25734	800	7.9404	0.225	29.8165	8.05	7.9404	3016	29.8165	0.0026691		18KH1cr-62	0.337553	18.7602	5.38793	29.5405	68.2432	3.37478	85.4271	66.205	73.5772	87.3626	76.25	68.8259	104.348	86.9919	1250.42	0.0441995	0.818677
15	286R_88	112.1	156.1	1.39251	0.0187446	30.5551	0.00203	6.34301	0.207593	492.611	6.34301	0.067	29.8894	13.07	6.34301	837	29.8894	0.0156153		286R_88	-0.0556962	7.74878	4.84914	10.0656	50.6757	3.73002	52.2613	57.8947	65.0407	65.9341	66.25	69.2308	76.3975	63.0081	1442	0.0724805	0.684071
15	18KH1cr-170	190.5	409.1	2.14751	0.0117559	30.4371	0.001706	4.90969	0.161306	586.167	4.90969	0.05	30.0385	10.99	4.90969	194	30.0385	0.0566495		18KH1cr-170	0	6.5416	4.74138	22.7571	54.0541	0.781528	92.4623	96.9529	110.569	130.037	133.75	149.798	205.59	204.878	1720.1	0.0110547	0.449741
12	18KH1-622	833	45.8	0.054982	0.0218483	32.957	0.00191	13.2895	0.403239	523.56	13.2895	0.083	30.1588	12.3	13.2895	1268	30.1588	0.00970032		18KH1-622	0	1.09299	2.58621	2.21007	14.8649	0	46.7337	52.3546	121.545	190.476	276.25	392.713	490.683	532.52	1300.89	0	0.095242
15	286R_71	106.4	41.1	0.386278	0.024802	30.7594	0.002278	4.57155	0.148623	438.982	4.57155	0.079	30.4177	14.67	4.57155	1171	30.4177	0.0125278		286R_71	0	5.13866	2.26293	4.07002	54.0541	8.88099	114.07	93.9058	119.919	113.553	130	157.49	134.161	145.122	1277.2	0.1131	0.850247
12	18KH1-626	646	28.2	0.0436533	0.0052889	31.1768	0.000738	4.789	0.153608	1355.01	4.789	0.052	30.8068	4.76	4.789	284	30.8068	0.0167606		18KH1-626	-75.9494	39.1517	96.9828	10.5033	31.0811	15.9858	42.7136	108.033	216.26	353.48	556.25	959.514	1515.53	2207.32	1339	0.438736	0.028184
12	18KH1c_438	150.8	103.9	0.688992	0.00782048	31.7225	0.001261	6.00877	0.189417	793.021	6.00877	0.045	31.1482	8.12	6.00877	0.0001	31.1482	81200		18KH1c_438	-0.0590717	5.4323	-7.86638	12.2538	87.1622	7.9929	79.8995	79.2244	68.6992	66.6667	56.875	36.0324	47.8261	57.3171	1545	0.0957785	1.67063
15	286R_29	186.6	83.6	0.448017	0.0213301	32.5468	0.00201	9.24587	0.284079	497.512	9.24587	0.077	31.2059	12.94	9.24587	1120	31.2059	0.0115536		286R_29	-0.0801688	3.99674	2.04741	27.5711	55.4054	15.2753	117.588	88.3657	99.187	68.6813	60.625	55.0607	69.5652	56.9106	1400.8	0.189249	1.69033
15	18KH1cr-39	254.2	255.2	1.00393	0.00952598	31.4567	0.00108	3.26318	0.103736	925.926	3.26318	0.064	31.2869	6.96	3.26318	741	31.2869	0.00939271		18KH1cr-39	0.135021	9.95106	7.00431	62.5821	225.676	7.1048	176.884	127.424	100	99.0842	83.125	61.9433	93.1677	89.0244	1380.2	0.0355602	1.89856
12	18KH1-257	604	32.5	0.0538079	0.00836831	32.1391	0.000759	7.3519	0.228752	1317.52	7.3519	0.08	31.2869	4.89	7.3519	1196	31.2869	0.00408863		18KH1-257	0	0	0	0	0	0	0	0	0	0	0	0	0	0	0	#DIV/0!	#DIV/0!
15	18KH1cr-158	101.1	317.6	3.14144	0.0115974	32.3223	0.00165	7.62775	0.23599	606.061	7.62775	0.051	31.4093	10.63	7.62775	240	31.4093	0.0442917		18KH1cr-158	0	8.67863	2.15517	42.4508	45.2703	4.97336	67.3367	78.1163	64.2276	64.1026	58.75	49.7976	72.6708	76.4228	1287.5	0.0900777	0.926599
12	18KH1c_449	326	285.5	0.875767	0.00473432	32.054	0.000904	5.28352	0.164832	1106.19	5.28352	0.038	31.6155	5.82	5.28352	0.0001	31.6155	58200		18KH1c_449	-0.0240506	7.17781	-4.63362	27.1335	127.703	5.3286	87.9397	60.6648	61.7886	84.2491	52.5	67.2065	68.9441	78.4553	1380.2	0.0502829	1.27552
15	18KH1cr-180	80.2	294.1	3.66708	0.115893	32.4716	0.00287	6.68021	0.205725	348.432	6.68021	0.293	31.777	18.47	6.68021	3433	31.777	0.00538013		18KH1cr-180	0.206751	4.17618	0.969828	12.6915	21.6216	0	38.6935	42.9363	35.7724	54.2125	39.375	34.413	37.8882	52.439	1297.8	0	1.02125
12	18KH1-367	85.3	105.1	1.23212	0.0388978	31.9974	0.00448	3.70275	0.11572	223.214	3.70275	0.063	31.7824	28.82	3.70275	707	31.7824	0.0407638		18KH1-367	-0.295359	125.612	6.46552	6.56455	39.8649	14.7425	176.382	249.307	414.634	692.308	1037.5	1348.18	1937.89	2394.31	721	0.175812	0.0910176
12	18KH1c_202	93.4	62	0.663812	0.0214913	34.008	0.00226	11.7321	0.34498	442.478	11.7321	0.069	31.9203	14.55	11.7321	898	31.9203	0.0162027		18KH1c_202	0.0239662	8.0261	0.360991	5.68928	43.2432	10.4796	134.171	232.687	459.35	626.374	1031.25	1165.99	1850.93	1939.02	1058.84	0.13758	0.0724883
15	18KH1cr-51	104.4	408.5	3.91284	0.0146087	33.5661	0.002	9.77446	0.2912	500	9.77446	0.053	32.1115	12.88	9.77446	328	32.1115	0.0392683		18KH1cr-51	0	5.0571	2.80172	15.0985	19.5946	0.461812	54.7739	41.2742	46.3415	50.9158	60	45.749	56.5217	67.4797	1483.2	0.0140965	0.969076
12	18KH1c_207	182.6	70.9	0.38828	0.0103647	32.8716	0.001213	6.13577	0.186659	824.402	6.13577	0.062	32.2939	7.81	6.13577	673	32.2939	0.0116048		18KH1c_207	-0.295359	3.80098	-136.853	8.53392	50	8.34813	120.603	103.878	93.4959	58.7912	58.75	45.749	66.4596	63.0081	1233.94	0.107504	1.81468
12	18KH1c_489	381	68.7	0.180315	0.00569933	34.3549	0.000899	10.706	0.311631	1112.35	10.706	0.046	32.6441	5.79	10.706	0.0001	32.6441	57900		18KH1c_489	-0.0506329	9.24959	2.58621	19.0372	84.4595	13.1439	89.4472	98.892	193.496	311.355	443.75	842.105	1347.83	1995.93	1442	0.151222	0.0663641
15	286R_98	116	36.9	0.318103	0.0215024	33.1757	0.00269	5.01899	0.151285	371.747	5.01899	0.058	32.7939	17.32	5.01899	529	32.7939	0.032741		286R_98	0.0421941	4.8124	3.01724	5.68928	54.0541	2.13144	78.392	73.9612	78.8618	90.293	120	138.057	179.503	156.504	1200.98	0.0327433	0.436716
12	18KH1-283	255.8	219.8	0.859265	0.0216099	33.3529	0.00245	5.78316	0.173393	408.163	5.78316	0.064	32.8477	15.77	5.78316	741	32.8477	0.0212821		18KH1-283	0	0	0	0	0	0	0	0	0	0	0	0	0	0	0	#DIV/0!	#DIV/0!
12	18KH1-609	362.4	40.5	0.111755	0.00692329	33.6145	0.000985	4.06377	0.120893	1015.23	4.06377	0.051	33.368	6.35	4.06377	240	33.368	0.0264583		18KH1-609	0	1.95759	2.69397	5.03282	32.4324	2.6643	113.568	119.114	97.561	69.7802	61.25	48.9879	63.9752	54.4715	1239.09	0.0439001	1.77519
15	18KH1cr-95	99.6	407	4.08635	0.0162107	34.1925	0.001352	7.46381	0.218288	739.645	7.46381	0.087	33.368	8.71	7.46381	1360	33.368	0.00640441		18KH1cr-95	0.299578	3.53997	3.23276	18.3807	51.3514	0	53.7688	66.482	72.3577	107.875	104.375	85.83	110.559	93.4959	1263.81	0	0.486336
12	18KH1c_341	71.5	128.1	1.79161	0.0919108	35.9752	0.00234	13.446	0.373758	427.35	13.446	0.285	33.368	15.07	13.446	3390	33.368	0.00444543		18KH1c_341	-0.0257384	6.0522	1.36853	19.256	44.5946	0.53286	58.2915	61.4958	61.7886	61.5385	66.25	80.9717	77.0186	76.8293	1202.01	0.0104513	0.756849
15	18KH9r_70	234.1	208.2	0.889364	0.0108184	34.8456	0.000882	8.69957	0.249661	1133.79	8.69957	0.089	33.7421	5.68	8.69957	1403	33.7421	0.00404847		18KH9r_70	-0.0548523	7.06362	3.01724	9.40919	65.5405	20.071	57.2864	71.1911	63.0081	56.044	48.125	42.5101	62.1118	45.122	1277.2	0.327559	0.922312
15	286R_14	145.9	117.4	0.804661	0.0200594	34.5958	0.00205	7.20617	0.208296	487.805	7.20617	0.071	33.837	13.2	7.20617	956	33.837	0.0138075		286R_14	0	7.96085	1.22845	15.9737	29.7297	3.37478	34.6734	40.9972	61.3821	51.2821	46.25	46.1538	63.354	72.7642	1325.61	0.105112	0.547295
12	18KH1c_230	299.2	27.3	0.0912433	0.00958938	34.6802	0.00098	7.60122	0.21918	1020.41	7.60122	0.071	33.837	6.31	7.60122	956	33.837	0.00660042		18KH1c_230	-1.26582	5.35073	-34.4828	6.12691	17.2973	9.23623	59.799	149.584	296.748	551.282	1000	1473.68	2770.19	3308.94	1390.5	0.287183	0.0215866
12	18KH1-400	420	31.5	0.075	0.0061522	35.4238	0.00072	10.2611	0.289667	1388.89	10.2611	0.062	33.9051	4.64	10.2611	673	33.9051	0.0068945		18KH1-400	0	0.424144	0	0	2.83784	0	37.1859	112.742	195.122	395.604	487.5	708.502	1149.07	1231.71	1380.2	0	0.0323618
12	18KH1c_251	607	110.6	0.182208	0.00409319	34.4898	0.000675	5.00431	0.145095	1481.48	5.00431	0.044	34.1248	4.35	5.00431	0.0001	34.1248	43500		18KH1c_251	0.0290717	7.55302	1.72414	10.9409	32.4324	12.7886	77.8894	156.233	276.829	531.136	786.25	1307.69	2372.67	3113.82	1349.3	0.254446	0.0328278
12	18KH1c_53	389.7	38.3	0.0982807	0.00706221	35.7823	0.000899	6.84933	0.191417	1112.35	6.84933	0.057	35.1206	5.79	6.84933	491	35.1206	0.0117923		18KH1c_53	-0.506329	1.92496	-15.0862	2.14442	14.1216	0.44405	90.9548	121.607	180.894	274.725	387.5	578.947	832.298	1239.84	1339	0.0123902	0.109281
12	18KH1-779	239.2	241.6	1.01003	0.00773242	35.4534	0.001039	4.07892	0.11505	962.464	4.07892	0.054	35.218	6.69	4.07892	370	35.218	0.0180811		18KH1-779	0	30.3426	3.55603	7.22101	63.5135	7.9929	178.894	349.03	561.382	992.674	1393.75	1955.47	2906.83	3341.46	1241.15	0.0749847	0.0615428
12	18KH1c_429	242.7	248.5	1.0239	0.00432969	35.6274	0.000924	4.61786	0.129616	1082.25	4.61786	0.034	35.3268	5.95	4.61786	0.0001	35.3268	59500		18KH1c_429	0.00464135	4.35563	-29.0948	12.035	55.4054	6.74956	51.2563	35.4571	46.3415	39.011	30	43.3198	63.354	33.3333	1329.73	0.126656	0.809045
15	18KH1cr-147	138.2	357.6	2.58755	0.0148843	36.144	0.00225	7.05227	0.195116	444.444	7.05227	0.048	35.4493	14.49	7.05227	98.2	35.4493	0.147556		18KH1cr-147	0	9.95106	2.47845	24.9453	56.7568	-0.426288	54.2714	47.6454	55.2846	63.37	49.375	43.7247	53.4161	70.3252	1340.03	-0.00768084	1.01601
15	286R_90	102.8	22.8	0.22179	0.0345317	36.5101	0.00261	8.73728	0.239311	383.142	8.73728	0.096	35.4493	16.8	8.73728	1547	35.4493	0.0108597		286R_90	0	2.5938	1.18534	3.19475	30.4054	9.05861	82.4121	105.817	97.1545	109.524	130	127.53	133.54	139.024	1187.59	0.180964	0.617132
15	18KH1cr-118	122.9	56.8	0.462164	0.019759	37.9107	0.00243	12.9629	0.341932	411.523	12.9629	0.059	35.6257	15.65	12.9629	566	35.6257	0.0276502		18KH1cr-118	-0.0962025	6.96574	5.17241	29.9781	65.5405	3.5524	48.7437	57.8947	58.5366	55.8608	58.125	68.0162	77.6398	81.3008	1266.9	0.0628503	0.627819
15	18KH9r_97	163.5	75.7	0.462997	0.0120563	38.5009	0.00108	14.078	0.365655	925.926	14.078	0.081	35.8347	6.96	14.078	1221	35.8347	0.00570025		18KH9r_97	0	3.31158	0.883621	9.84683	46.6216	1.36767	44.2211	54.2936	61.3821	49.2674	41.875	53.0364	40.9938	36.9919	1246.3	0.0301213	1.07873
12	18KH1c_352	151.1	76.2	0.504302	0.00977323	36.0499	0.001338	3.48319	0.0966214	747.384	3.48319	0.053	35.8813	8.62	3.48319	328	35.8813	0.0262805		18KH1c_352	-0.0375527	4.53507	1.2931	14.0044	51.3514	4.26288	44.2211	49.3075	43.0894	48.1685	47.5	52.2267	49.6894	73.9837	1380.2	0.0894565	0.88995
15	286R_19	93.4	47.4	0.507495	0.0309705	36.4741	0.00212	6.54923	0.179558	471.698	6.54922	0.106	35.8813	13.65	6.54922	1731	35.8813	0.00788562		286R_19	-0.0278481	5.31811	0.344828	12.4726	24.3243	1.31439	42.7136	65.374	68.2927	66.1172	65.625	68.0162	58.3851	86.9919	1246.3	0.0407774	0.731583
15	286R_48	193.2	79.6	0.412008	0.017106	36.6737	0.00214	5.6313	0.153551	467.29	5.6313	0.058	36.2388	13.78	5.6313	529	36.2388	0.0260491		286R_48	0.0835443	3.0832	0.528017	7.87746	61.4865	19.8934	127.638	121.607	118.293	87.5458	109.375	103.239	114.907	73.9837	1503.8	0.224558	1.1108
15	18KH9r_83	237	115.6	0.487764	0.0100541	37.0035	0.000829	6.681	0.18055	1206.27	6.681	0.088	36.3954	5.34	6.681	1382	36.3954	0.00386397		18KH9r_83	-0.0464135	29.8532	1.72414	10.7221	58.1081	11.5453	53.2663	50.6925	61.3821	54.5788	63.75	52.2267	57.1429	82.1138	1565.6	0.20752	0.932161
15	18KH9r_79	290	30.2	0.104138	0.0154313	37.1144	0.000783	7.26997	0.19588	1277.14	7.26997	0.143	36.3954	5.05	7.26997	2263	36.3954	0.00223155		18KH9r_79	0	33.1158	1.2931	13.1291	47.2973	5.68384	54.7739	50.6925	62.6016	54.5788	84.375	70.0405	112.422	86.1789	1483.2	0.11167	0.487215
15	18KH1cr-38	91.6	6.2	0.0676856	0.0290314	37.6599	0.00383	9.67679	0.256952	261.097	9.67679	0.055	36.3954	24.64	9.67679	411	36.3954	0.0599513		18KH1cr-38	0	8.97227	3.77155	23.6324	49.3243	6.74956	76.3819	83.1025	94.3089	117.216	111.875	125.506	154.658	140.65	1411.1	0.109964	0.493875
12	18KH1c_220	740	148	0.2	0.00432059	37.5856	0.00055	7.28186	0.193741	1818.18	7.28186	0.057	36.8734	3.54	7.28186	491	36.8734	0.00720978		18KH1c_220	-0.295359	7.11256	0.31681	0.984683	19.5946	3.19716	80.9045	168.698	263.008	315.018	460.625	473.684	747.205	747.967	973.35	0.0802989	0.108276
15	286R_68	108.6	34.8	0.320442	0.0250829	38.6957	0.00182	11.2271	0.290139	549.451	11.2271	0.1	37.0312	11.72	11.2271	1623	37.0312	0.0072212		286R_68	0.0253165	5.66069	2.15517	4.66083	39.8649	3.90764	59.2965	72.0222	73.1707	94.8718	85.625	82.5911	103.727	97.9675	1127.85	0.080372	0.571661
15	18KH1cr-36	84.2	9.7	0.115202	0.0136192	37.9192	0.00183	7.98853	0.210672	546.448	7.98853	0.054	37.0682	11.79	7.98853	370	37.0682	0.0318649		18KH1cr-36	0	8.7602	2.26293	21.8818	43.9189	5.15098	72.3618	77.8393	91.4634	136.996	120	148.178	159.627	166.667	1462.6	0.0913711	0.453317
15	286R_34	163.6	83.6	0.511002	0.0205294	37.5061	0.002128	4.98021	0.132784	469.925	4.98021	0.07	37.1739	13.7	4.98021	927	37.1739	0.0147789		286R_34	0	3.11582	0.118534	6.56455	22.973	4.61812	54.7739	44.5983	52.8455	35.8974	38.125	31.9838	26.7081	33.7398	1174.2	0.130188	2.05084
12	18KH1-739	131.2	89.3	0.68064	0.0189293	38.4316	0.00205	9.07673	0.236179	487.805	9.07673	0.067	37.3444	13.2	9.07673	837	37.3444	0.0157706		18KH1-739	0.194093	9.86949	1.93966	4.59519	19.5946	6.39432	114.573	221.607	362.602	666.667	1043.75	1485.83	2142.86	2682.93	1088.71	0.134954	0.0534673
12	18KH1-332	407	33.3	0.0818182	0.00555682	37.7188	0.001008	3.76134	0.0997207	992.063	3.76134	0.04	37.5308	6.49	3.76134	0.0001	37.5308	64900		18KH1-332	-3.20675	11.4192	19.2888	11.1597	50	9.59147	71.3568	109.141	176.423	373.626	681.25	1170.04	2105.59	2890.24	1377.11	0.160577	0.0338892
15	286R_12	165.4	62.5	0.377872	0.0191834	38.2233	0.002109	4.88957	0.127921	474.158	4.88957	0.066	37.9093	13.58	4.88957	805	37.9093	0.0168696		286R_12	-0.0206751	2.88744	0.689655	12.2538	44.5946	6.57194	53.2663	79.5014	68.2927	42.8571	38.75	44.5344	32.2981	36.1789	1023.82	0.134842	1.64921
12	18KH1c_159	169.3	71	0.419374	0.00740331	38.5631	0.001279	5.79282	0.150217	781.861	5.79282	0.042	38.1256	8.24	5.79282	0.0001	38.1256	82400		18KH1c_159	-0.7173	19.739	-120.69	4.07002	95.9459	18.4725	144.724	140.443	178.049	289.377	381.25	562.753	813.665	1065.04	1060.9	0.156762	0.177866
15	18KH1cr-99	92.2	294.6	3.19523	0.0192306	38.6555	0.001368	5.47708	0.14169	730.994	5.47708	0.102	38.2655	8.81	5.47708	1660	38.2655	0.00530723		18KH1cr-99	0	12.8874	1.8319	22.5383	62.8378	4.26288	87.9397	78.1163	95.5285	86.0806	93.75	142.51	116.149	141.057	1575.9	0.0573456	0.757128
12	18KH1-408	363	42.1	0.115978	0.00702045	38.6167	0.000849	4.41547	0.114341	1177.86	4.41548	0.06	38.3635	5.47	4.41548	603	38.3635	0.00907131		18KH1-408	-0.632911	3.0832	0.862069	1.90372	34.4595	0	89.4472	106.648	105.691	177.656	186.875	187.854	304.348	329.268	1297.8	0	0.293898
15	18KH1cr-2	119.7	46.9	0.391813	0.0149257	38.7616	0.001805	5.54141	0.142961	554.017	5.54141	0.06	38.3635	11.63	5.54141	603	38.3635	0.0192869		18KH1cr-2	0	11.4192	2.69397	27.3523	44.5946	1.7762	51.2563	70.3601	53.252	70.5128	71.25	58.7045	54.0373	46.3415	1181.41	0.0371516	0.948536
12	18KH1c_340	102.5	31.7	0.309268	0.00806773	38.9088	0.001501	5.68278	0.146054	666.222	5.68278	0.039	38.4916	9.67	5.68278	0.0001	38.4916	96700		18KH1c_340	0	9.29853	2.5	23.1947	75	5.15098	112.06	106.925	112.602	122.711	130	129.96	136.025	129.675	1240.12	0.0561866	0.823822
15	286R_45	115.6	31.5	0.272491	0.0202592	39.4133	0.0021	7.95864	0.201928	476.19	7.95864	0.07	38.6014	13.52	7.95864	927	38.6014	0.0145847		286R_45	0	3.84992	0.431034	4.07002	14.1892	2.6643	45.7286	55.4017	64.2276	60.6227	68.75	88.2591	91.9255	81.3008	1236	0.104595	0.497453
15	18KH1cr-44	136.7	69.1	0.505486	0.0118088	38.9968	0.001382	4.47184	0.114672	723.589	4.47184	0.062	38.7395	8.9	4.47184	673	38.7395	0.0132244		18KH1cr-44	0	2.47961	0.959052	11.5974	54.7297	2.30906	63.8191	56.2327	43.9024	47.4359	38.75	39.6761	25.4658	34.5528	1246.3	0.0390704	2.50607
15	18KH1cr-83	103.4	377.1	3.647	0.0126462	39.146	0.00148	5.62669	0.143736	675.676	5.62669	0.062	38.7395	9.53	5.62669	673	38.7395	0.0141605		18KH1cr-83	0.101266	9.46166	1.61638	13.3479	60.8108	0	64.3216	71.4681	64.6341	54.5788	63.125	80.9717	58.3851	37.8049	1359.6	0	1.10168
15	18KH9r_85	421	28.6	0.0679335	0.00540136	39.7938	0.000568	7.07446	0.177778	1760.56	7.07446	0.069	39.1599	3.66	7.07446	898	39.1599	0.00407572		18KH9r_85	0	6.80261	0.797414	5.2954	10.4054	7.46004	71.3568	149.584	215.447	217.949	181.875	251.012	310.559	313.008	1349.3	0.273775	0.229769
15	286R_22	183.7	81.9	0.445836	0.0141374	39.9613	0.00223	7.96272	0.199261	448.43	7.96272	0.046	39.1599	14.36	7.96272	0.0001	39.1599	143600		286R_22	0	2.52855	1.12069	21.2254	41.8919	3.19716	63.3166	54.2936	78.0488	64.1026	66.25	69.6356	73.2919	86.1789	1344.15	0.0620784	0.863896
15	18KH1cr-128	126.6	279.2	2.20537	0.00962934	39.5477	0.00137	4.88227	0.123453	729.927	4.88227	0.051	39.2451	8.83	4.88227	240	39.2451	0.0367917		18KH1cr-128	0	10.2773	2.15517	14.6608	51.3514	4.97336	62.3116	37.9501	56.5041	76.9231	63.125	71.2551	78.882	70.7317	1400.8	0.0879203	0.789934
15	18KH1cr-176	100.1	315.4	3.15085	0.0218538	40.0419	0.00157	5.70693	0.142524	636.943	5.70693	0.101	39.6331	10.11	5.70693	1642	39.6331	0.00615713		18KH1cr-176	-0.16962	9.93475	0.592672	18.3807	29.7297	3.5524	47.2362	36.5651	44.7154	50.7326	40.625	37.247	58.3851	52.0325	1318.4	0.0947957	0.809045
15	18KH9r_81	178.9	115.6	0.646171	0.010693	40.681	0.001141	8.72238	0.214409	876.424	8.72238	0.068	39.735	7.35	8.72238	868	39.735	0.00846774		18KH9r_81	0	17.4551	2.90948	10.9409	42.5676	4.97336	33.6683	36.0111	34.1463	35.8974	38.75	44.9393	48.4472	47.561	1256.6	0.131371	0.694949
12	18KH1-151	232	45.2	0.194828	0.0146115	40.0422	0.00114	4.26905	0.106614	877.193	4.26905	0.093	39.814	7.34	4.26905	1487	39.814	0.00493611		18KH1-151	0	0	0	0	0	0	0	0	0	0	0	0	0	0	0	#DIV/0!	#DIV/0!
15	18KH1cr-87	111.3	173.3	1.55705	0.0111012	40.8506	0.00179	8.1524	0.199566	558.659	8.1524	0.045	40.0289	11.53	8.1524	0.0001	40.0289	115300		18KH1cr-87	0.506329	7.79772	2.58621	31.5098	49.3243	2.48668	48.2412	74.2382	57.3171	38.8278	45	46.1538	37.2671	41.8699	1462.6	0.0509777	1.29447
15	18KH1cr-46	130.8	300	2.29358	0.0126848	41.0424	0.00177	7.15918	0.174434	564.972	7.15918	0.052	40.4132	11.4	7.15918	284	40.4132	0.0401408		18KH1cr-46	-0.264557	7.06362	3.77155	23.8512	54.7297	3.73002	70.3518	45.9834	65.0407	74.9084	66.25	81.7814	81.3665	89.8374	1503.8	0.0601121	0.864628
12	18KH1c_446	249.3	248.7	0.997593	0.00703699	41.253	0.00074	7.26555	0.176122	1351.35	7.26555	0.069	40.6082	4.77	7.26555	898	40.6082	0.0053118		18KH1c_446	-0.00253165	5.677	-4.74138	20.5689	71.6216	3.37478	48.7437	57.3407	38.6179	36.8132	31.875	27.9352	32.9193	31.7073	1364.75	0.0571168	1.48071
15	286R_33	171.8	108.6	0.63213	0.0147217	41.108	0.00218	4.64596	0.113018	458.716	4.64596	0.049	40.8446	14.04	4.64596	147	40.8446	0.0955102		286R_33	0	7.06362	1.40086	22.1007	28.3784	0.746004	47.7387	84.4875	109.756	121.795	145	172.065	231.056	202.846	1689.2	0.020268	0.206611
12	18KH1c_235	393.4	99.5	0.252923	0.00361634	42.0946	0.00064	7.10152	0.168704	1562.5	7.10152	0.041	41.4913	4.12	7.10152	0.0001	41.4913	41200		18KH1c_235	-0.632911	10.0163	-95.9052	3.10722	21.6216	3.73002	71.8593	119.668	264.228	401.099	700	963.563	1397.52	1617.89	1297.8	0.0946292	0.0514193
15	309-1_4	70	86.4	1.23429	0.0149439	42.3035	0.001004	7.15278	0.169083	996.016	7.15278	0.108	41.6944	6.47	7.15278	1765	41.6944	0.00366572		309-1_4	0	5.0571	0.140086	1.64114	18.9189	8.88099	38.6935	55.1247	49.5935	52.9304	38.125	40.081	36.646	41.8699	1009.4	0.328242	1.05587
12	18KH1c_412	99.9	284.5	2.84785	0.0102619	42.4392	0.001241	7.91603	0.186527	805.802	7.91603	0.06	41.6944	8	7.91603	603	41.6944	0.013267		18KH1c_412	0.0348101	7.29201	12.1767	18.5996	51.3514	1.52753	53.7688	40.4432	47.9675	49.4505	36.25	43.3198	52.1739	64.6341	1431.7	0.0290703	1.03057
15	18KH1cr-78	95.9	319.1	3.32742	0.0156051	42.5824	0.00169	8.0288	0.188547	591.716	8.0288	0.067	41.8187	10.89	8.0288	837	41.8187	0.0130108		18KH1cr-78	0	7.34095	3.125	32.6039	44.5946	1.42096	61.3065	58.1717	64.6341	80.0366	81.875	91.0931	98.1366	114.634	1318.4	0.0271761	0.624706
12	18KH1c_217	209.4	33.9	0.161891	0.00576617	42.691	0.000973	8.24113	0.193041	1027.75	8.24113	0.043	41.8881	6.27	8.24113	0.0001	41.8881	62700		18KH1c_217	-1.68776	7.12887	-366.379	2.69147	30.4054	8.17052	63.8191	99.169	172.764	252.747	450	534.413	807.453	841.463	1050.6	0.185481	0.0790375
12	18KH1-770	354	25.6	0.0723164	0.00720099	42.3724	0.001045	5.3952	0.127328	956.938	5.3952	0.05	42.0275	6.73	5.3952	194	42.0275	0.0346907		18KH1-770	0.303797	2.44698	2.58621	1.15974	15.7432	1.7762	36.6834	109.418	235.772	412.088	687.5	1283.4	2372.67	3000	1452.3	0.0739111	0.0154608
12	18KH1c_253	275	166	0.603636	0.00777983	42.8386	0.001129	8.29682	0.193676	885.74	8.29683	0.05	42.0275	7.27	8.29683	194	42.0275	0.0374742		18KH1c_253	-0.28692	17.1289	6.89655	62.3632	65.5405	2.84192	90.9548	132.964	162.602	205.128	229.375	336.032	602.484	914.634	1359.6	0.0368081	0.150966
15	18KH1cr-33	108.2	172.3	1.59242	0.0118693	42.5435	0.001213	4.72027	0.110952	824.402	4.72027	0.071	42.2809	7.81	4.72027	956	42.2809	0.00816946		18KH1cr-33	0.0843882	19.2496	3.44828	30.8534	58.7838	0.53286	72.3618	62.8809	71.9512	78.7546	46.25	74.0891	63.9752	80.4878	1524.4	0.00817014	1.13109
15	18KH9r_80	279	248.2	0.889606	0.00674922	43.2022	0.000742	8.01887	0.185613	1347.71	8.01887	0.066	42.4515	4.78	8.01887	805	42.4515	0.00593789		18KH9r_80	-0.0464135	10.7667	5.38793	14.2232	82.4324	6.39432	45.7286	69.5291	50	43.7729	56.875	40.4858	59.0062	43.0894	1287.5	0.104148	0.77498
15	18KH9r_90	332	83.9	0.252711	0.00552347	43.4709	0.000691	5.43143	0.124944	1447.18	5.43143	0.058	43.1302	4.45	5.43143	529	43.1302	0.0084121		18KH9r_90	-0.00590717	5.77488	0.193966	7.65864	90.5405	3.73002	116.583	124.931	89.0244	59.1575	38.125	40.081	37.8882	34.1463	1297.8	0.0363055	3.07702
15	18KH1cr-80a	118.9	17	0.142977	0.0100581	43.6507	0.001431	6.50018	0.148913	698.812	6.50018	0.051	43.164	9.22	6.50018	240	43.164	0.0384167		18KH1cr-80a	0	7.19413	1.93966	26.477	64.1892	1.20782	89.9497	74.2382	85.3659	91.0256	89.375	85.83	98.7578	61.7886	1194.8	0.0158953	0.910812
15	18KH1cr-116	96.6	343.5	3.5559	0.0170825	43.9369	0.00185	7.39386	0.168284	540.54	7.39386	0.067	43.3103	11.91	7.39386	837	43.3103	0.0142294		18KH1cr-116	0	4.27406	0.797414	19.6937	39.8649	1.22558	61.3065	46.5374	52.8455	59.5238	58.125	53.0364	80.1242	62.6016	1297.8	0.0247909	0.765144
15	18KH1cr-132	79.4	321.7	4.05164	0.0194323	44.9153	0.00235	11.7173	0.260876	425.532	11.7173	0.06	43.36	15.13	11.7173	603	43.36	0.0250912		18KH1cr-132	0	5.38336	4.52586	17.9431	48.6486	2.30906	38.191	45.4294	61.7886	51.4652	63.125	70.4453	76.3975	74.7967	1637.7	0.0535697	0.499898
12	18KH1-716	185	64.2	0.347027	0.0117251	43.8642	0.001233	5.60329	0.127742	811.03	5.60329	0.069	43.5048	7.94	5.60329	898	43.5048	0.00884187		18KH1-716	0	34.9103	0	3.10722	29.0541	10.4796	70.8543	151.801	258.13	459.707	787.5	1145.75	1844.72	2422.76	1328.7	0.230971	0.0384092
15	18KH1cr-137	103.1	324.7	3.14937	0.0151241	44.1591	0.00177	7.15918	0.162122	564.972	7.15918	0.062	43.5749	11.4	7.15918	673	43.5749	0.0169391		18KH1cr-137	0.337553	7.12887	1.93966	18.3807	45.2703	1.7762	49.7487	40.7202	54.4715	47.4359	39.375	42.1053	47.8261	40.6504	1277.2	0.0374278	1.0402
15	18KH1r_MR1_18	214.2	54.5	0.254435	0.0103144	44.1992	0.001313	5.25237	0.118834	761.615	5.25237	0.057	43.886	8.46	5.25237	491	43.886	0.0172301		18KH1r_MR1_18	0.0886076	3.62153	0.280172	8.3151	70.2703	4.4405	130.151	94.7368	77.6423	52.1978	44.375	52.2267	56.5217	48.374	1297.8	0.0464325	2.30267
12	18KH1c_54	204.3	67.1	0.328439	0.0126379	45.3071	0.00131	9.44464	0.208458	763.359	9.44464	0.07	44.3118	8.44	9.44464	927	44.3118	0.00910464		18KH1c_54	-0.506329	18.2708	-153.017	5.09847	46.6216	9.41385	92.9648	168.975	202.846	347.985	677.5	1105.26	1739.13	2170.73	1291.62	0.142993	0.0534548
15	286R_64	119.7	65	0.543024	0.0332086	46.5449	0.00251	12.5629	0.26991	398.406	12.5629	0.096	44.8174	16.16	12.5629	1547	44.8174	0.010446		286R_64	0.379747	3.83361	1.28233	2.10066	39.8649	5.68384	67.8392	68.6981	84.5528	68.1319	95.625	87.0445	111.801	80.0813	1318.4	0.109296	0.606784
15	18KH1cr-96	88.5	19	0.214689	0.0167821	45.4726	0.001485	5.42728	0.119353	673.401	5.42728	0.082	45.1475	9.57	5.42728	1245	45.1475	0.00768675		18KH1cr-96	-0.246835	6.6721	2.37069	15.0985	45.9459	4.61812	78.392	67.313	51.2195	67.7656	70.625	80.1619	86.3354	90.6504	1318.4	0.0769495	0.907993
12	18KH1c_61	136.6	21	0.153734	0.00714283	45.5328	0.001234	4.94363	0.108573	810.373	4.94363	0.042	45.2636	7.95	4.94363	0.0001	45.2636	79500		18KH1c_61	0.0209283	6.55791	-202.586	7.24289	55.4054	2.13144	86.9347	71.4681	73.1707	71.6117	64.375	65.1822	70.1863	83.3333	1236	0.0307114	1.23863
12	18KH1-510	137	18.7	0.136496	0.0131423	45.6672	0.00149	5.47317	0.119849	671.141	5.47317	0.064	45.338	9.6	5.47317	741	45.338	0.0129555		18KH1-510	0	9.02121	6.78879	10.7221	38.5135	2.48668	61.809	74.7922	86.1789	73.9927	77.5	86.6397	81.9876	91.8699	1263.81	0.0509668	0.753883
12	18KH1-63	335	42.8	0.127761	0.0133898	45.9412	0.000908	3.34073	0.0727175	1101.32	3.34073	0.107	45.8196	5.851	3.34073	1748	45.8196	0.00334725		18KH1-63	0	0	0	0	0	0	0	0	0	0	0	0	0	0	0	#DIV/0!	#DIV/0!
12	18KH1c_488	113.5	7.5	0.0660793	0.0108187	46.7121	0.00157	7.98187	0.170874	636.943	7.98187	0.05	46.0251	10.11	7.98187	194	46.0251	0.0521134		18KH1c_488	0	7.24307	1.40086	8.3151	50	5.15098	42.7136	38.7812	50.813	47.0696	25	30.7692	37.2671	36.1789	1390.5	0.111461	1.14615
15	18KH1cr-93	71.8	123.8	1.72423	0.0195272	46.4026	0.001592	5.3557	0.115418	628.141	5.3557	0.089	46.0925	10.25	5.3557	1403	46.0925	0.00730577		18KH1cr-93	0	8.36868	3.34052	29.1028	41.8919	0	48.7437	42.6593	40.2439	48.1685	37.5	46.1538	46.5839	59.3496	1195.83	0	1.04637
15	18KH1cr-125	99.3	92.7	0.933535	0.0132581	47.1938	0.00148	9.73506	0.206278	675.676	9.73506	0.065	46.1789	9.53	9.73506	773	46.1789	0.0123286		18KH1cr-125	0.130802	6.13377	2.47845	10.7221	41.2162	0	47.2362	40.1662	41.8699	40.4762	30.625	40.8907	40.9938	24.7967	1271.02	0	1.15228
15	18KH1cr-123	86.1	231	2.68293	0.021472	47.0899	0.0019	8.22295	0.174622	526.316	8.22295	0.082	46.3664	12.24	8.22295	1245	46.3664	0.00983133		18KH1cr-123	-0.163291	5.9217	4.84914	18.5996	42.5676	0.497336	65.3266	75.3463	76.8293	88.4615	93.75	93.9271	106.832	78.0488	1215.4	0.00943116	0.611488
15	18KH1cr-157	80.7	54.4	0.674102	0.0127757	48.8217	0.00206	14.2643	0.292172	485.437	14.2643	0.045	46.6914	13.27	14.2643	0.0001	46.6914	132700		18KH1cr-157	0	5.62806	3.01724	14.2232	35.1351	1.7762	60.804	51.8006	32.5203	31.685	26.875	29.5547	33.5404	22.7642	1277.2	0.0384286	1.81286
15	18KH1cr-89	148.3	255.2	1.72084	0.0106023	47.5388	0.00157	7.37423	0.15512	636.943	7.37423	0.049	46.9634	10.11	7.37423	147	46.9634	0.0687755		18KH1cr-89	-0.0957806	5.25285	0.959052	19.0372	65.5405	0.852575	80.402	75.0693	95.122	119.048	118.125	173.279	155.28	191.057	1699.5	0.0117448	0.517789
12	18KH1c_359	185.1	130.8	0.706645	0.00637822	48.0312	0.001157	6.95974	0.1449	864.304	6.95974	0.04	47.5243	7.45	6.95974	0.0001	47.5243	74500		18KH1c_359	0.0102532	11.4192	3.125	45.2954	117.568	3.37478	143.719	127.701	119.919	106.227	116.875	99.1903	105.59	105.285	1290.59	0.0259624	1.3611
15	18KH1cr-23	92.6	169.8	1.83369	0.017711	49.2229	0.00181	11.2866	0.229295	552.486	11.2866	0.071	47.9114	11.66	11.2866	956	47.9114	0.0121967		18KH1cr-23	0	7.66721	2.15517	8.75274	26.3514	2.48668	61.3065	50.6925	64.6341	83.5165	108.75	134.818	96.8944	102.033	1297.8	0.0618678	0.632715
15	18KH1cr-150	154.6	200.2	1.29495	0.00759432	48.4153	0.001148	6.76206	0.139668	871.08	6.76206	0.048	47.9408	7.4	6.76206	98.2	47.9408	0.0753564		18KH1cr-150	0	6.06852	4.74138	17.2867	46.6216	0.692718	64.3216	70.3601	70.7317	64.4689	60.625	67.2065	81.9876	73.5772	1751	0.0126498	0.784529
12	18KH1-548	181	170.2	0.940331	0.0129345	48.3355	0.001188	4.50364	0.0931746	841.751	4.50364	0.079	48.1253	7.65	4.50364	1171	48.1253	0.00653288		18KH1-548	-2.19409	4.45351	7.97414	14.442	87.1622	2.30906	110.05	77.5623	80.4878	49.6337	50.625	39.6761	44.0994	45.5285	1339	0.0235763	2.49551
15	18KH1cr-178a	137.3	169.5	1.23452	0.00923822	48.579	0.001197	5.74376	0.118236	835.422	5.74376	0.056	48.2382	7.71	5.74376	451	48.2382	0.0170953		18KH1cr-178a	0	7.24307	3.87931	22.1007	41.2162	2.84192	71.8593	68.4211	81.7073	74.359	49.375	44.1296	37.2671	20.7317	1318.4	0.0522199	1.92822
15	18KH1cr-1b	97.8	84.4	0.862986	0.0267808	50.0039	0.00347	13.1707	0.263393	288.184	13.1707	0.056	48.2382	22.33	13.1707	451	48.2382	0.0495122		18KH1cr-1b	0.421941	9.6248	3.23276	38.9497	60.8108	0	65.8291	55.6787	72.3577	75.2747	72.5	81.3765	81.3665	87.8049	1400.8	0	0.809045
12	18KH1c_206	96.9	264.5	2.72962	0.0107994	48.7162	0.001306	5.90296	0.12117	765.697	5.90296	0.06	48.3572	8.41	5.90296	603	48.3572	0.0139469		18KH1c_206	-1.56118	12.8874	-431.034	8.75274	27.027	5.68384	71.3568	78.1163	74.7967	89.7436	108.75	130.364	254.658	264.228	1213.34	0.129427	0.280206
12	18KH1-781	112.2	74.4	0.663102	0.0117917	48.8216	0.001426	6.71739	0.137591	701.262	6.71739	0.06	48.3572	9.19	6.71739	603	48.3572	0.0152405		18KH1-781	0.0253165	17.7814	4.4181	10.5033	44.5946	11.5453	93.9698	132.41	206.098	342.491	475	663.968	993.789	1203.25	875.5	0.178349	0.0945572
15	18KH9r_95	114.5	166.7	1.4559	0.0181768	50.688	0.00121	14.2366	0.280868	826.446	14.2366	0.109	48.6476	7.8	14.2366	1782	48.6476	0.0043771		18KH9r_95	0	15.6607	3.125	24.07	50	12.611	48.7437	53.1856	53.252	45.9707	59.375	62.753	71.4286	59.3496	1290.59	0.25545	0.682412
15	18KH1cr-1a	103.4	61.6	0.595745	0.0197769	49.4198	0.00175	7.77648	0.157355	571.429	7.77648	0.082	48.8042	11.27	7.77648	1245	48.8042	0.00905221		18KH1cr-1a	0	9.55954	10.4526	29.1028	60.1351	0	84.4221	77.8393	87.8049	76.1905	80	85.0202	90.6832	95.5285	1297.8	0	0.930956
12	18KH1-508	124.9	48.7	0.389912	0.0133959	49.6706	0.00216	8.64491	0.174045	462.963	8.64491	0.045	48.9125	13.91	8.64491	0.0001	48.9125	139100		18KH1-508	0	9.07015	9.80603	12.9103	39.8649	0	65.3266	43.4903	46.748	52.1978	66.25	51.417	72.0497	58.5366	1339	0	0.906689
15	18KH1cr-82	92.5	213.3	2.30595	0.0161247	49.9176	0.0018	8.11072	0.162482	555.556	8.11072	0.065	49.2542	11.59	8.11072	773	49.2542	0.0149935		18KH1cr-82	0	7.68352	0.775862	18.3807	22.973	0.53286	43.7186	56.5097	65.4472	76.5568	61.875	63.5628	68.9441	50.4065	1380.2	0.016814	0.634117
15	18KH1cr-65	100.1	306.7	3.06394	0.0101688	50.4177	0.001604	6.29553	0.124867	623.441	6.29553	0.046	50.0231	10.33	6.29553	0.0001	50.0231	103300		18KH1cr-65	-0.175105	5.85644	1.33621	12.035	34.4595	-0.513321	53.7688	53.1856	47.9675	69.5971	38.75	36.8421	39.1304	41.4634	1400.8	-0.0119253	1.37409
15	286R_3	147.2	130.1	0.883832	0.0191181	50.4203	0.00204	6.31602	0.125267	490.196	6.31602	0.068	50.0231	13.14	6.31602	868	50.0231	0.0151382		286R_3	-0.00801688	7.1615	2.03664	19.4748	35.1351	5.15098	40.201	57.6177	65.8537	67.5824	73.75	86.6397	101.863	76.4228	1390.5	0.137057	0.394656
12	18KH1c_249	235.2	180.2	0.766156	0.00538868	50.8253	0.00115	8.99469	0.176972	869.565	8.99469	0.034	50.0231	7.41	8.99469	0.0001	50.0231	74100		18KH1c_249	-0.379747	25.2855	-183.19	7.00219	20.6081	3.5524	72.3618	99.723	204.878	344.322	558.75	724.696	1167.7	1231.71	1067.08	0.0919915	0.0619694
12	18KH1-185	148	59.9	0.40473	0.0162984	51.3903	0.00162	8.34779	0.162439	617.284	8.34779	0.073	50.7077	10.43	8.34779	1013	50.7077	0.0102962		18KH1-185	0	0	0	0	0	0	0	0	0	0	0	0	0	0	0	#DIV/0!	#DIV/0!
15	18KH1cr-167	101.3	406.2	4.00987	0.0154909	50.9419	0.001629	4.44699	0.0872954	613.874	4.44699	0.069	50.7474	10.49	4.44699	898	50.7474	0.0116815		18KH1cr-167	-0.259494	7.92822	1.93966	21.2254	35.1351	1.24334	73.3668	43.4903	62.6016	66.8498	45.625	89.8785	83.2298	79.2683	1143.3	0.0244889	0.881497
15	18KH1cr-17	92.3	311.7	3.37703	0.0119769	51.2545	0.001704	5.07044	0.0989268	586.855	5.07044	0.051	51.003	10.98	5.07044	240	51.003	0.04575		18KH1cr-17	0	5.1876	0.49569	14.8796	24.3243	0	49.2462	60.3878	68.2927	62.6374	86.25	95.9514	131.056	150.407	1977.6	0	0.375765
12	18KH1-370	211.8	81.5	0.384797	0.00875103	51.2115	0.001351	3.57639	0.0698356	740.192	3.57639	0.047	51.0864	8.7	3.57639	48.2	51.0864	0.180498		18KH1-370	0	2.1044	3.55603	5.9081	54.7297	1.22558	112.563	97.2299	70.7317	55.6777	39.375	34.0081	46.5839	37.8049	1227.76	0.0156146	2.41635
15	18KH1cr-139	127.9	382.3	2.98905	0.00865773	51.3596	0.001396	4.81167	0.0936858	716.332	4.81167	0.045	51.1337	8.99	4.81167	0.0001	51.1337	89900		18KH1cr-139	0	8.77651	2.47845	17.2867	40.5405	0	36.6834	38.7812	28.8618	45.6044	39.375	29.1498	32.9193	24.7967	1359.6	0	1.11435
15	18KH9r_71	363	31.5	0.0867769	0.00498626	51.4032	0.000804	5.25629	0.102256	1243.78	5.25629	0.045	51.1337	5.18	5.25629	0.0001	51.1337	51800		18KH9r_71	0	35.7259	1.34698	9.40919	39.8649	3.5524	43.2161	36.8421	44.3089	38.4615	36.875	39.6761	51.5528	40.2439	1380.2	0.0855862	0.838288
12	18KH1c_101	212.8	52.8	0.24812	0.00502347	51.4474	0.00081	5.6724	0.110256	1234.57	5.6724	0.045	51.1337	5.22	5.6724	0.0001	51.1337	52200		18KH1c_101	-8.18565	3.96411	-195.043	4.77024	32.4324	2.30906	120.101	93.6288	53.252	39.1941	23.875	19.8381	31.677	45.935	1188.62	0.0369975	3.79141
12	18KH1-621	115.4	11	0.0953206	0.0126815	52.1698	0.001704	5.54632	0.106313	586.855	5.54632	0.054	51.8741	10.98	5.54632	370	51.8741	0.0296757		18KH1-621	0.0421941	5.62806	5.06466	6.56455	40.5405	0	65.8291	50.6925	54.878	54.9451	36.875	42.5101	60.8696	56.9106	1162.87	0	1.08148
15	18KH1cr-146	110.1	348.5	3.1653	0.00554028	52.4141	0.001608	6.39787	0.122064	621.89	6.39787	0.025	52.0222	10.36	6.39787	0.0001	52.0222	103600		18KH1cr-146	0	9.1354	0.678879	18.5996	34.4595	-0.456483	55.7789	44.3213	48.7805	45.9707	41.875	49.7976	39.7516	47.561	1184.5	-0.010412	1.40319
12	18KH1-175	282.4	51.9	0.183782	0.0116034	52.5065	0.000979	4.08071	0.0777183	1021.45	4.08071	0.086	52.3477	6.31	4.08071	1337	52.3477	0.00471952		18KH1-175	0	0	0	0	0	0	0	0	0	0	0	0	0	0	0	#DIV/0!	#DIV/0!
12	18KH1-210	61	18.7	0.306557	0.0514979	52.6515	0.002251	4.80638	0.0912867	444.247	4.80638	0.166	52.4317	14.49	4.80638	2517	52.4317	0.00575685		18KH1-210	0	0	0	0	0	0	0	0	0	0	0	0	0	0	0	#DIV/0!	#DIV/0!
12	18KH1-323	84.9	9	0.106007	0.0418181	52.9182	0.001597	5.28558	0.0998822	626.174	5.28558	0.19	52.6535	10.29	5.28558	2741	52.6535	0.0037541		18KH1-323	0	0	0	0	0	0	0	0	0	0	0	0	0	0	0	#DIV/0!	#DIV/0!
12	18KH1-19	266	56.1	0.210902	0.0149737	52.9577	0.001006	4.08809	0.0771955	994.036	4.08809	0.108	52.7997	6.48	4.08809	1765	52.7997	0.00367139		18KH1-19	0	0	0	0	0	0	0	0	0	0	0	0	0	0	0	#DIV/0!	#DIV/0!
15	18KH1cr-91	68.2	259.5	3.80499	0.0133463	54.0916	0.00269	11.7514	0.217251	371.747	11.7514	0.036	52.7997	17.32	11.7514	0.0001	52.7997	173200		18KH1cr-91	0	5.56281	1.72414	15.5361	36.4865	0	39.196	36.8421	43.4959	41.0256	41.875	33.6032	45.9627	50	1411.1	0	0.852777
12	18KH1c_15	293.6	40.2	0.136921	0.00753148	53.5463	0.000828	7.25812	0.135548	1207.73	7.25812	0.066	53.0521	5.34	7.25812	805	53.0521	0.00663354		18KH1c_15	-2.32068	10.832	-140.086	4.72648	31.7568	19.0053	94.9749	157.895	204.878	311.355	525	781.377	1291.93	1707.32	1203.04	0.346061	0.0735142
12	18KH1c_403	99.6	198	1.98795	0.0145784	54.0184	0.00129	6.03672	0.111753	775.194	6.03672	0.082	53.6801	8.31	6.03672	1245	53.6801	0.0066747		18KH1c_403	-0.0113924	5.41599	7.00431	15.9737	44.5946	3.19716	44.2211	47.0914	44.3089	47.619	48.125	34.413	60.2484	49.5935	1400.8	0.071996	0.733979
15	18KH1cr-72	99.5	418.6	4.20704	0.0153309	54.2652	0.00206	7.63617	0.140719	485.437	7.63617	0.054	53.7252	13.27	7.63617	370	53.7252	0.0358649		18KH1cr-72	0	6.75367	0.969828	26.2582	40.5405	0	55.2764	47.0914	61.3821	56.7766	65	57.085	61.4907	70.3252	1483.2	0	0.898939
12	18KH1c_260	113	397.5	3.5177	0.00854609	54.5331	0.00159	8.49345	0.155748	628.931	8.49345	0.039	53.8676	10.24	8.49345	0.0001	53.8676	102400		18KH1c_260	-0.0253165	5.54649	2.26293	23.1947	52.027	2.30906	47.2362	47.9224	50.813	51.8315	46.875	42.5101	59.0062	68.2927	1453.33	0.0465782	0.800529
12	18KH1c_103	48.6	2.1	0.0432099	0.0137129	54.5261	0.00199	7.4016	0.135744	502.513	7.4016	0.05	54.0214	12.82	7.4016	194	54.0214	0.0660825		18KH1c_103	-2.06751	1.99021	0.295259	0.218818	14.0541	7.9929	78.392	125.762	75.2033	100.733	89.375	79.7571	99.3789	102.846	1421.4	0.240806	0.788819
12	18KH1c_67	179.2	190.7	1.06417	0.00646642	55.2611	0.001173	5.14616	0.0931244	852.515	5.14616	0.04	55.021	7.56	5.14616	0.0001	55.021	75600		18KH1c_67	-0.92827	8.61338	-127.155	2.99781	25	3.37478	104.523	158.726	258.13	426.74	593.75	838.057	1118.01	1422.76	1097.98	0.0660192	0.0934897
15	18KH1cr-35	103.5	66	0.637681	0.0137156	55.6071	0.001244	8.0525	0.144811	803.859	8.0525	0.08	55.021	8.01	8.0525	1196	55.021	0.00669732		18KH1cr-35	-0.16962	5.17129	1.40086	10.9409	37.8378	3.01954	61.3065	102.77	102.439	98.3516	96.25	97.5709	109.317	104.472	1369.9	0.0626937	0.560815
12	18KH1-279	218.9	154.1	0.703974	0.0154648	55.6988	0.001039	3.69148	0.0662758	962.464	3.69148	0.108	55.5763	6.69	3.69148	1765	55.5763	0.00379037		18KH1-279	0	0	0	0	0	0	0	0	0	0	0	0	0	0	0	#DIV/0!	#DIV/0!
15	18KH1cr-29	97.4	111.5	1.14476	0.015856	56.6881	0.001475	5.39608	0.0951888	677.966	5.39608	0.078	56.4307	9.5	5.39608	1146	56.4307	0.0082897		18KH1cr-29	0.00843882	8.28711	2.58621	16.6302	33.7838	4.79574	55.2764	48.4765	65.0407	80.5861	60	53.4413	53.4161	83.3333	1411.1	0.110977	1.03483
12	18KH1c_46	139.3	53.6	0.384781	0.0135737	57.2743	0.00147	7.82849	0.136684	680.272	7.82849	0.067	56.7368	9.47	7.82849	837	56.7368	0.0113142		18KH1c_46	0.0214768	12.0718	-24.7845	1.90372	7.56757	5.86146	47.2362	92.5208	163.008	300.366	456.875	740.891	1018.63	1239.84	1082.53	0.31002	0.0463721
15	18KH1r_MR1_20	126.4	6.3	0.0498418	0.00982367	58.309	0.00216	9.09202	0.155928	462.963	9.09202	0.033	57.5958	13.91	9.09202	0.0001	57.5958	139100		18KH1r_MR1_20	0.0139241	7.031	4.52586	20.3501	145.946	3.90764	142.211	120.499	141.057	161.172	155	169.231	158.385	211.382	1179.35	0.0271239	0.897882
12	18KH1-342	406	46.2	0.113793	0.00666763	57.9199	0.00082	5.61466	0.0969383	1219.51	5.61466	0.059	57.6472	5.28	5.61466	566	57.6472	0.00932862		18KH1-342	-0.421941	2.77325	5.81897	3.71991	36.4865	0	109.045	141.274	210.976	340.659	456.25	659.919	1155.28	1512.2	1358.57	0	0.0943886
15	18KH1cr-173	126.5	289	2.28458	0.0107636	59.3269	0.00142	11.5	0.19384	704.225	11.5	0.055	58.2017	9.15	11.5	411	58.2017	0.0222628		18KH1cr-173	0	10.2773	3.01724	31.9475	103.378	3.19716	105.025	121.33	152.033	205.128	226.25	263.158	340.373	349.593	1514.1	0.0306833	0.308559
12	18KH1-226	124.6	64.1	0.514446	0.0288289	58.7517	0.001423	5.17705	0.0881175	702.741	5.17705	0.147	58.5231	9.17	5.17705	2311	58.5231	0.00396798		18KH1-226	0	0	0	0	0	0	0	0	0	0	0	0	0	0	0	#DIV/0!	#DIV/0!
12	18KH1c_269	284	179.9	0.633451	0.00550362	58.7998	0.000974	5.34557	0.0909113	1026.69	5.34557	0.041	58.5563	6.28	5.34557	0.0001	58.5563	62800		18KH1c_269	-0.0801688	8.59706	3.23276	15.5361	60.8108	8.17052	133.166	196.676	349.593	445.055	743.75	862.348	1279.5	1711.38	1205.1	0.0907951	0.104076
15	18KH1cr-77	107.8	354.4	3.28757	0.0083967	58.8184	0.001486	5.54647	0.0942981	672.947	5.54647	0.041	58.5563	9.57	5.54647	0.0001	58.5563	95700		18KH1cr-77	0.164557	7.06362	0.528017	17.5055	41.8919	4.08526	81.407	52.6316	62.1951	66.3004	76.875	77.7328	92.5466	99.5935	1400.8	0.0699558	0.879633
12	18KH1-288	278.8	65.9	0.23637	0.00943791	58.864	0.001087	3.66378	0.0622414	919.963	3.66378	0.063	58.7498	7	3.66378	707	58.7498	0.00990099		18KH1-288	0	0	0	0	0	0	0	0	0	0	0	0	0	0	0	#DIV/0!	#DIV/0!
15	18KH1cr-172a	163.4	214	1.30967	0.00690675	59.1994	0.001285	4.92767	0.0832386	778.21	4.92767	0.039	58.9939	8.28	4.92767	0.0001	58.9939	82800		18KH1cr-172a	0.261603	6.68842	4.63362	26.2582	37.1622	0.852575	53.2663	46.2604	45.5285	54.0293	44.375	42.5101	50.9317	38.6179	1400.8	0.0191627	1.04584
15	18KH1cr-124	95.1	362.1	3.80757	0.00915718	59.3916	0.001356	4.72707	0.0795916	737.463	4.72707	0.049	59.2032	8.74	4.72707	147	59.2032	0.0594558		18KH1cr-124	-0.268776	5.25285	1.50862	16.849	38.5135	4.4405	40.7035	32.687	59.7561	46.8864	50.625	73.2794	77.0186	61.7886	1637.7	0.112153	0.528489
15	18KH1cr-71	82	329.5	4.01829	0.0114651	60.2104	0.00141	10.192	0.169273	709.22	10.192	0.059	59.3415	9.08	10.192	566	59.3415	0.0160424		18KH1cr-71	0	4.8124	2.04741	15.3173	34.4595	-1.48313	51.7588	55.4017	53.252	71.7949	65.625	80.9717	91.9255	121.951	1287.5	-0.0351182	0.563052
12	18KH1-607	106.7	106.4	0.997188	0.011574	59.9445	0.001615	6.08601	0.101527	619.195	6.08601	0.052	59.6348	10.4	6.08601	284	59.6348	0.0366197		18KH1-607	0	8.77651	15.625	13.7856	57.4324	3.90764	75.3769	68.9751	73.1707	80.4029	73.75	72.8745	94.4099	97.1545	1369.9	0.0593904	0.7984
15	18KH1cr-119	93.1	313.6	3.36842	0.0127013	60.2614	0.001536	5.39739	0.0895663	651.042	5.39739	0.06	60.0193	9.89	5.39739	603	60.0193	0.0164013		18KH1cr-119	0.126582	5.28548	5.60345	27.7899	54.0541	0.159858	54.7739	79.2244	64.2276	83.6996	54.375	70.8502	77.6398	68.6992	1194.8	0.00293787	0.705487
15	18KH1cr-112	124.4	14.6	0.117363	0.0101365	60.3277	0.001471	6.09319	0.101001	679.81	6.09319	0.05	60.0193	9.48	6.09319	194	60.0193	0.048866		18KH1cr-112	0	12.0718	2.90948	32.1663	64.1892	7.63766	88.4422	84.4875	87.3984	84.9817	76.875	78.5425	68.323	76.4228	1225.7	0.101368	1.29447
15	18KH1cr-7	77.1	78.6	1.01946	0.0173937	60.4525	0.001856	4.10024	0.0678257	538.793	4.10023	0.068	60.3133	11.95	4.10023	868	60.3133	0.0137673		18KH1cr-7	0	10.2773	4.20259	37.8556	53.3784	2.13144	72.3618	64.2659	79.2683	69.5971	89.375	46.5587	62.1118	91.4634	1266.9	0.0342954	1.16503
15	18KH1cr-67	87.2	213	2.44266	0.00903645	60.5947	0.001366	4.38512	0.072368	732.064	4.38511	0.048	60.4358	8.8	4.38511	98.2	60.4358	0.089613		18KH1cr-67	0	5.85644	3.125	19.4748	49.3243	4.26288	65.8291	76.1773	85.7724	69.0476	75	68.8259	62.7329	73.5772	1297.8	0.0748106	1.04936
15	18KH1cr-140	109.1	12.3	0.112741	0.00894852	60.783	0.00151	6.01964	0.0990348	662.252	6.01964	0.043	60.4842	9.73	6.01964	0.0001	60.4842	97300		18KH1cr-140	0	6.11746	1.2931	18.5996	63.5135	6.57194	83.9196	74.5152	84.9593	77.6557	65.625	70.4453	75.7764	78.0488	1308.1	0.0900178	1.10746
12	18KH1-322	59.2	1.1	0.0185811	0.0497799	61.976	0.0042	6.38129	0.102964	238.095	6.38129	0.086	61.6466	27.02	6.38129	1337	61.6466	0.0202094		18KH1-322	0	0	0	0	0	0	0	0	0	0	0	0	0	0	0	#DIV/0!	#DIV/0!
12	18KH1-280	202.1	195.6	0.967838	0.0123838	62.6924	0.001404	4.66607	0.074428	712.251	4.66607	0.064	62.5185	9.04	4.66607	741	62.5185	0.0121997		18KH1-280	0	0	0	0	0	0	0	0	0	0	0	0	0	0	0	#DIV/0!	#DIV/0!
15	18KH1cr-52	97.4	378.8	3.88912	0.00920624	63.0432	0.00167	8.1171	0.128755	598.802	8.1171	0.04	62.5185	10.76	8.1171	0.0001	62.5185	107600		18KH1cr-52	0.337553	8.20555	3.34052	10.7221	36.4865	0	72.8643	52.3546	51.2195	61.5385	63.75	69.2308	67.0807	91.8699	1339	0	1.08622
15	18KH1cr-104	86.1	284.8	3.30778	0.00858606	63.4794	0.00178	8.7352	0.137607	561.798	8.7352	0.035	62.8755	11.46	8.7352	0.0001	62.8755	114600		18KH1cr-104	-0.0907173	6.18271	4.9569	15.9737	39.8649	0	57.7889	45.7064	36.1789	63.0037	63.75	63.5628	78.882	75.2033	1390.5	0	0.7326
15	18KH1cr-155	101.1	324.2	3.20673	0.0113733	63.7468	0.001587	5.82897	0.0914395	630.12	5.82897	0.052	63.4797	10.22	5.82897	284	63.4797	0.0359859		18KH1cr-155	0.548523	8.77651	1.40086	22.5383	57.4324	-1.0071	50.2513	62.6039	60.5691	72.8938	62.5	73.2794	86.9565	82.1138	1246.3	-0.0187466	0.577889
15	18KH9r_98	186.9	104.5	0.559123	0.00763291	64.4984	0.000989	5.0083	0.0776499	1011.12	5.0083	0.056	64.3037	6.37	5.0083	451	64.3037	0.0141242		18KH9r_98	0	19.5759	3.44828	22.5383	34.4595	3.01954	42.7136	59.8338	45.122	52.9304	46.25	48.9879	62.7329	53.6585	1503.8	0.0787052	0.68088
15	18KH1cr-37	141.9	517.7	3.64834	0.00872884	64.6655	0.001508	6.8312	0.105639	663.13	6.8312	0.042	64.3037	9.71	6.8312	0.0001	64.3037	97100		18KH1cr-37	0	7.17781	1.40086	29.3217	56.7568	1.95382	87.9397	64.8199	62.6016	53.1136	49.375	61.1336	52.795	56.9106	1462.6	0.0276556	1.66568
15	18KH1cr-169	119.8	353.3	2.94908	0.00957008	66.4102	0.00112	5.91216	0.0890248	892.857	5.91216	0.062	66.1465	7.22	5.91216	673	66.1465	0.0107281		18KH1cr-169	0.177215	8.61338	1.72414	33.698	47.973	0	78.392	47.9224	60.5691	92.1245	41.25	54.6559	67.7019	76.4228	1328.7	0	1.1579
15	18KH1cr-47	50.6	2.2	0.0434783	0.0215451	67.0628	0.00193	7.11761	0.106134	518.135	7.11761	0.081	66.684	12.43	7.11761	1221	66.684	0.0101802		18KH1cr-47	0	2.82219	0.49569	4.814	13.5135	9.94671	54.7739	68.4211	97.561	132.784	78.75	123.887	103.106	103.252	1491.44	0.365602	0.531241
15	18KH1cr-113	97.6	314.8	3.22541	0.0120332	66.9081	0.001712	5.47182	0.081781	584.112	5.47182	0.051	66.684	11.03	5.47182	240	66.684	0.0459583		18KH1cr-113	0	7.55302	3.87931	19.9125	33.1081	0.976909	48.7437	72.8532	51.2195	97.0696	75	78.1377	108.075	113.415	1545	0.024318	0.451019
15	18KH1cr-49	83.8	328	3.91408	0.0109993	67.6425	0.001735	5.62171	0.0831092	576.369	5.62171	0.046	67.4084	11.17	5.62171	0.0001	67.4084	111700		18KH1cr-49	0	7.50408	1.8319	17.5055	39.1892	0.888099	52.7638	33.518	65.8537	87.7289	78.75	75.3036	63.9752	71.5447	1359.6	0.0195304	0.824755
15	18KH1cr-68	90.1	214.5	2.38069	0.00926137	67.8728	0.00168	6.93984	0.102248	595.238	6.93983	0.04	67.5171	10.82	6.93983	0.0001	67.5171	108200		18KH1cr-68	0	7.50408	1.61638	13.1291	62.8378	2.84192	59.2965	59.0028	70.7317	61.7216	65	63.5628	80.1242	93.0894	1318.4	0.0465572	0.740057
15	18KH1cr-48	109	372.4	3.41651	0.0069707	67.7478	0.001367	4.69807	0.0693464	731.529	4.69806	0.037	67.5847	8.81	4.69806	0.0001	67.5847	88100		18KH1cr-48	0	7.01468	2.80172	22.9759	51.3514	1.7762	45.7286	62.8809	67.8862	48.7179	64.375	62.753	65.2174	64.6341	1390.5	0.036654	0.701173
15	18KH1cr-85	98.9	203.2	2.0546	0.00766475	68.8499	0.001589	5.99669	0.087098	629.327	5.99669	0.035	68.5883	10.24	5.99669	0.0001	68.5883	102400		18KH1cr-85	0	4.12724	2.15517	21.663	46.6216	0.62167	46.2312	46.2604	51.626	48.3516	40.625	44.5344	67.0807	52.8455	1545	0.0133906	0.689187
15	18KH1cr-13	119.3	362	3.03437	0.0098595	69.9272	0.00146	8.53492	0.122054	684.932	8.53492	0.049	69.4044	9.4	8.53492	147	69.4044	0.0639456		18KH1cr-13	-0.18481	7.1615	1.72414	12.9103	33.7838	1.42096	59.2965	44.8753	41.0569	61.5385	50.625	53.4413	63.354	50.813	1565.6	0.0317478	0.935954
15	18KH1cr-172b	73.9	282.8	3.82679	0.0136991	70.4813	0.00142	8.08071	0.114651	704.225	8.08071	0.07	70.0165	9.15	8.08071	927	70.0165	0.00987055		18KH1cr-172b	0	4.86134	2.15517	14.0044	26.3514	0	33.1658	42.1053	34.9593	32.967	26.875	40.8907	45.9627	43.0894	1256.6	0	0.721581
15	18KH1cr-129	102.4	44.8	0.4375	0.00874455	70.4472	0.00135	5.5373	0.0786022	740.741	5.53731	0.047	70.2292	8.7	5.53731	48.2	70.2292	0.180498		18KH1cr-129	0	7.29201	1.5194	31.291	53.3784	1.59858	76.8844	88.6427	91.4634	117.949	93.125	106.883	142.857	161.789	1225.7	0.0249535	0.538191
15	18KH1cr-30	142.3	9.2	0.0646521	0.00995763	70.5442	0.001338	4.71032	0.0667712	747.384	4.71032	0.054	70.3868	8.62	4.71032	370	70.3868	0.0232973		18KH1cr-30	0	5.31811	1.2931	16.4114	46.6216	1.11901	86.9347	81.1634	107.317	139.194	128.75	112.551	150.932	173.171	1215.4	0.0175769	0.575987
15	18KH1cr-43	122.1	410.8	3.36446	0.00506068	70.6635	0.00136	6.24759	0.0884133	735.294	6.24759	0.027	70.3868	8.76	6.24759	0.0001	70.3868	87600		18KH1cr-43	0	14.3556	4.84914	43.7637	79.0541	1.95382	80.9045	76.4543	60.1626	72.7106	90.625	61.5385	78.2609	75.2033	1380.2	0.0244307	1.03378
12	18KH1-630	310.5	95.9	0.308857	0.00777955	71.5824	0.000896	4.43726	0.0619882	1116.07	4.43727	0.063	71.4447	5.77	4.43727	707	71.4447	0.00816124		18KH1-630	0	1.71289	3.01724	7.00219	57.4324	0	141.709	136.011	91.8699	54.3956	28.125	16.1943	27.3292	16.6667	1218.49	0	5.18524
15	18KH1cr-110	92.9	190	2.04521	0.00686334	73.4599	0.00166	4.03332	0.054905	602.41	4.03332	0.03	73.3491	10.69	4.03332	0.0001	73.3491	106900		18KH1cr-110	0	7.83034	4.09483	31.7287	70.2703	0	80.9045	73.6842	58.5366	65.9341	60	44.9393	57.764	48.374	1431.7	0	1.40061
12	18KH1-291	143	49.4	0.345455	0.0186617	73.5544	0.001092	4.71928	0.0641605	915.751	4.71928	0.124	73.4028	7.04	4.71928	2014	73.4028	0.00349553		18KH1-291	0	0	0	0	0	0	0	0	0	0	0	0	0	0	0	#DIV/0!	#DIV/0!
15	18KH1cr-144	95.1	292	3.07045	0.00917744	73.7225	0.001359	5.91101	0.0801792	735.835	5.91101	0.049	73.4851	8.75	5.91101	147	73.4851	0.0595238		18KH1cr-144	0	6.47635	0.862069	11.8162	54.0541	0.71048	56.7839	51.5235	67.0732	63.7363	73.125	78.9474	100.621	134.146	1390.5	0.012824	0.564334
15	18KH1cr-55	91.6	363.3	3.96616	0.0103153	73.9299	0.001227	4.60846	0.0623355	814.996	4.60846	0.061	73.7861	7.9	4.60846	638	73.7861	0.0123824		18KH1cr-55	0.320675	4.89396	1.61638	19.256	32.4324	-0.852575	51.7588	54.0166	54.4715	45.7875	56.875	45.3441	52.1739	61.3821	1308.1	-0.020809	0.992044
12	18KH1-681	296.2	198.7	0.670831	0.00602816	74.4357	0.00081	7.16908	0.0963124	1234.57	7.16908	0.054	74.0897	5.22	7.16908	370	74.0897	0.0141081		18KH1-681	0	13.8662	0	9.19037	72.2973	11.3677	371.859	722.992	1056.91	1739.93	3093.75	4129.55	5341.61	5731.71	1225.7	0.06933	0.0696155
12	18KH1c_143	107.6	59	0.548327	0.0109772	75.2459	0.00135	9.90049	0.131575	740.741	9.90049	0.059	74.5918	8.7	9.90049	566	74.5918	0.015371		18KH1c_143	-2.40506	21.6966	-173.491	3.67615	25	16.341	97.4874	154.294	224.797	412.088	745.625	1137.65	1714.29	2235.77	1048.54	0.331005	0.0568677
12	18KH1-318	117.3	10.53	0.0897698	0.0192887	74.9659	0.001538	5.80654	0.0774558	650.195	5.80654	0.091	74.7407	9.91	5.80654	1446	74.7407	0.00685339		18KH1-318	0	0	0	0	0	0	0	0	0	0	0	0	0	0	0	#DIV/0!	#DIV/0!
15	286R_16	107.9	46.2	0.428174	0.0129714	75.3935	0.00181	7.5416	0.10003	552.486	7.5416	0.052	75.0154	11.66	7.5416	284	75.0154	0.0410563		286R_16	0	5.33442	0.484914	16.4114	50	7.63766	96.4824	100	132.927	126.374	118.125	135.223	135.404	141.057	1266.9	0.109964	0.712554
15	18KH9r_99	180.9	130.5	0.721393	0.00725309	76.5519	0.000892	6.37133	0.0832289	1121.08	6.37133	0.059	76.2863	5.75	6.37133	566	76.2863	0.010159		18KH9r_99	-0.0189873	18.1077	2.32759	26.477	40.5405	7.46004	37.6884	55.9557	43.4959	35.348	38.125	59.1093	69.5652	71.1382	1277.2	0.19085	0.541771
12	18KH1-142	246	148.1	0.602033	0.0106175	77.1268	0.00107	10.5345	0.136587	934.579	10.5345	0.072	76.404	6.89	10.5345	985	76.404	0.00699492		18KH1-142	0	0	0	0	0	0	0	0	0	0	0	0	0	0	0	#DIV/0!	#DIV/0!
15	18KH1cr-161	82.1	341.4	4.15834	0.013851	77.6671	0.001621	6.00967	0.0773773	616.903	6.00967	0.062	77.4343	10.44	6.00967	673	77.4343	0.0155126		18KH1cr-161	0.156118	5.62806	1.93966	33.698	29.7297	0	52.7638	57.3407	47.9675	67.033	78.125	65.9919	52.1739	75.2033	1575.9	0	1.01131
15	18KH1cr-164	84.5	12.4	0.146746	0.0107291	77.9091	0.00173	4.25837	0.0546582	578.035	4.25837	0.045	77.7926	11.14	4.25837	0.0001	77.7926	111400		18KH1cr-164	0.164557	8.61338	6.35776	19.6937	44.5946	2.48668	87.9397	93.6288	83.7398	96.337	88.75	118.219	95.6522	89.4309	1236	0.0397087	0.91937
15	18KH1cr-109a	69.7	38.6	0.553802	0.0124284	78.215	0.00167	8.1171	0.103779	598.802	8.1171	0.054	77.7926	10.76	8.1171	370	77.7926	0.0290811		18KH1cr-109a	0.801688	8.85808	4.4181	32.1663	80.4054	2.84192	85.9296	95.0139	78.8618	80.7692	65.625	66.8016	59.6273	82.1138	1194.8	0.0341899	1.44111
15	18KH1cr-130	102.9	276.8	2.68999	0.00518265	78.4859	0.001635	5.74081	0.0731446	611.621	5.74081	0.023	78.2756	10.53	5.74081	0.0001	78.2756	105300		18KH1cr-130	-0.271308	9.77162	4.74138	20.5689	35.8108	1.06572	54.2714	50.4155	44.3089	34.7985	28.125	50.2024	40.3727	44.3089	1380.2	0.0241741	1.34426
15	18KH1cr-70	109.6	265.3	2.42062	0.00654236	78.6057	0.001283	5.77761	0.0735012	779.423	5.77761	0.037	78.3931	8.27	5.77761	0.0001	78.3931	82700		18KH1cr-70	0	6.47635	3.01724	23.1947	47.2973	5.50622	86.9347	72.8532	93.0894	130.037	120.625	146.559	145.342	162.602	1689.2	0.0858694	0.59814
12	18KH1-137	218	72.8	0.333945	0.00816737	78.593	0.001162	4.80333	0.0611165	860.585	4.80333	0.051	78.4461	7.49	4.80333	240	78.4461	0.0312083		18KH1-137	0	0	0	0	0	0	0	0	0	0	0	0	0	0	0	#DIV/0!	#DIV/0!
15	18KH1cr-120	110.3	3.6	0.0326383	0.00729195	81.3557	0.00143	6.50416	0.0799471	699.301	6.50416	0.037	81.0953	9.21	6.50416	0.0001	81.0953	92100		18KH1cr-120	0.0970464	6.93312	2.47845	22.9759	72.2973	1.95382	112.563	106.925	128.862	130.22	125.625	177.733	180.745	169.919	1242.18	0.0216584	0.62277
12	18KH1-320	97.3	3.55	0.0364851	0.0232692	82.4057	0.00201	6.39787	0.0776387	497.512	6.39787	0.084	82.1569	12.94	6.39787	1292	82.1569	0.0100155		18KH1-320	0	0	0	0	0	0	0	0	0	0	0	0	0	0	0	#DIV/0!	#DIV/0!
15	18KH1cr-76	106	76.6	0.722642	0.0196832	84.213	0.00386	8.35394	0.0992002	259.067	8.35394	0.037	83.7976	24.84	8.35394	0.0001	83.7976	248400		18KH1cr-76	0	13.3605	7.5431	45.0766	99.3243	3.73002	137.186	163.435	129.268	126.374	111.875	134.818	141.615	136.992	1411.1	0.0319542	0.968725
12	18KH1-251	174	74.9	0.43046	0.00955299	84.7501	0.001333	4.52853	0.0534339	750.188	4.52853	0.052	84.629	8.59	4.52853	284	84.629	0.0302465		18KH1-251	0	0	0	0	0	0	0	0	0	0	0	0	0	0	0	#DIV/0!	#DIV/0!
12	18KH1c_222	106	96.8	0.913208	0.0106754	87.0489	0.001291	8.00597	0.0919709	774.593	8.00597	0.06	86.68	8.32	8.00597	603	86.68	0.0137977		18KH1c_222	0.0224051	19.739	-183.19	5.03282	55.4054	25.0444	107.035	229.917	365.041	668.498	1043.75	1376.52	1981.37	2451.22	1081.5	0.325216	0.0540209
12	18KH1-159	414	55.1	0.133092	0.00557887	88.0624	0.00088	13.829	0.157036	1136.36	13.829	0.046	86.9698	5.67	13.829	0.0001	86.9698	56700		18KH1-159	0	0	0	0	0	0	0	0	0	0	0	0	0	0	0	#DIV/0!	#DIV/0!
12	18KH1c_415	94.3	82.3	0.872747	0.0069605	87.5375	0.001295	7.76173	0.0886675	772.201	7.76173	0.039	87.1927	8.34	7.76173	0.0001	87.1927	83400		18KH1c_415	-0.0274262	36.7047	6.68103	9.19037	37.1622	14.2096	86.4322	170.914	327.236	516.484	856.25	1008.1	1658.39	2097.56	1037.21	0.250723	0.0521183
15	18KH1cr-145	100.4	2.3	0.0229084	0.00831318	89.9497	0.00208	7.11289	0.0790763	480.769	7.11289	0.029	89.6681	13.39	7.11289	0.0001	89.6681	133900		18KH1cr-145	0	7.07993	4.74138	15.7549	46.6216	7.46004	59.2965	81.4404	63.0081	79.1209	77.5	63.9676	73.2919	73.9837	1411.1	0.141884	0.809045
15	18KH1cr-45	79.9	149.5	1.87109	0.00818639	90.7252	0.00198	11.3467	0.125066	505.05	11.3467	0.03	90.0128	12.75	11.3467	0.0001	90.0128	127500		18KH1cr-45	-0.289451	10.6036	3.44828	28.0088	44.5946	3.19716	61.3065	65.097	58.5366	63.0037	61.25	56.6802	67.7019	93.0894	1380.2	0.0611462	0.905537
15	18KH1cr-148	136	307.3	2.25956	0.00665854	91.7954	0.000833	8.5967	0.0936507	1200.48	8.5967	0.058	91.392	5.37	8.5967	529	91.392	0.0101512		18KH1cr-148	0	9.11909	2.37069	19.9125	56.7568	1.06572	58.2915	45.7064	47.9675	59.5238	53.75	69.2308	59.0062	56.0976	1225.7	0.0185281	0.987887
15	18KH1cr-97	92	305.6	3.32174	0.00871148	93.4214	0.00147	8.48109	0.0907831	680.272	8.48109	0.043	93.0357	9.47	8.48109	0.0001	93.0357	94700		18KH1cr-97	0.101266	6.88418	3.77155	26.9147	25.6757	0	52.7638	54.5706	56.5041	73.4432	86.25	76.5182	67.7019	71.9512	1400.8	0	0.779355
15	18KH1cr-149	116.4	337.1	2.89605	0.00820017	94.9858	0.0017	11.4107	0.12013	588.235	11.4107	0.035	94.298	10.95	11.4107	0.0001	94.298	109500		18KH1cr-149	0	7.11256	3.66379	27.3523	50.6757	5.86146	58.2915	72.5762	84.1463	88.6447	82.5	110.121	114.907	110.163	1565.6	0.107846	0.507293
15	18KH1cr-50	103.5	365.7	3.53333	0.00734005	95.3369	0.001299	6.21492	0.0651891	769.823	6.21492	0.041	95.1341	8.37	6.21492	0.0001	95.1341	83700		18KH1cr-50	0.379747	6.85155	2.80172	29.9781	24.3243	0.817052	34.1709	56.5097	40.2439	49.2674	50	57.085	62.1118	52.0325	1452.3	0.0283401	0.550151
15	18KH1cr-14	113.1	392.8	3.47303	0.00573323	97.1143	0.0013	6.64172	0.0683908	769.231	6.64172	0.032	96.8869	8.37	6.64172	0.0001	96.8869	83700		18KH1cr-14	-0.11519	7.11256	2.37069	22.9759	41.8919	0.674956	81.9095	79.7784	62.6016	65.5678	86.25	79.3522	86.3354	63.8211	1442	0.0115224	0.948736
15	18KH1cr-40	122.8	8.8	0.0716612	0.00405419	100.163	0.001279	5.50719	0.0549822	781.861	5.50719	0.023	100.012	8.24	5.50719	0.0001	100.012	82400		18KH1cr-40	-0.172996	5.1876	2.58621	14.8796	46.6216	2.84192	107.035	90.3047	91.4634	115.018	98.75	127.53	164.596	139.431	1380.2	0.0402304	0.650289
15	18KH9r_94	117.2	118.6	1.01195	0.00820293	100.586	0.00124	10.7332	0.106707	806.452	10.7332	0.048	100.012	7.99	10.7332	98.2	100.012	0.0813646		18KH9r_94	-0.0109705	15.6607	1.78879	18.3807	51.3514	5.15098	44.7236	50.6925	52.439	60.6227	65.625	88.2591	86.9565	63.0081	1215.4	0.107484	0.514322
12	18KH1-545	78.9	26.1	0.330798	0.0114587	102.76	0.002188	4.91343	0.0478144	457.038	4.91343	0.038	102.643	14.09	4.91343	0.0001	102.643	140900		18KH1-545	-1.13924	22.186	35.5603	24.07	74.3243	0.586146	75.8794	76.1773	65.8537	52.5641	76.875	68.4211	63.354	72.3577	1349.3	0.00780509	1.1977
12	18KH1-274	260.6	115.3	0.442441	0.00602761	104.603	0.000994	3.12304	0.0298561	1006.04	3.12304	0.044	104.557	6.405	3.12304	0.0001	104.557	64050		18KH1-274	0	0	0	0	0	0	0	0	0	0	0	0	0	0	0	#DIV/0!	#DIV/0!
15	18KH1cr-156	104	103	0.990385	-0.0048341	108.282	0.000948	5.94792	0.0549298	1054.85	5.94792	-0.037	108.119	6.11	5.94792	0.0001	108.119	61100		18KH1cr-156	0.126582	22.5122	1.18534	24.5077	32.4324	3.37478	45.7286	64.5429	69.5122	62.8205	60.625	74.4939	88.1988	67.0732	1545	0.0876317	0.518473
15	18KH1cr-154	66.6	322.4	4.84084	-0.00669795	111.444	0.00135	8.46654	0.0759715	740.741	8.46654	-0.036	111.122	8.7	8.46654	0.0001	111.122	87000		18KH1cr-154	0	6.88418	2.26293	15.7549	31.0811	1.15453	52.2613	34.349	44.7154	46.8864	33.75	40.8907	52.795	53.252	1215.4	0.0286462	0.989891
15	18KH1cr-59	67.5	48.8	0.722963	0.00544891	117.551	0.001719	5.93231	0.0504658	581.734	5.93231	0.023	117.401	11.07	5.93231	0.0001	117.401	110700		18KH1cr-59	0	6.16639	1.40086	17.9431	33.1081	1.42096	72.3618	61.7729	69.5122	91.7582	74.375	73.2794	77.6398	95.122	1339	0.0290308	0.93202
12	18KH1c_44	104.1	341.2	3.27762	0.00479055	118.5	0.00158	8.54327	0.0720951	632.911	8.54327	0.022	118.192	10.18	8.54327	0.0001	118.192	101800		18KH1c_44	-1.09705	11.0277	-119.612	8.16193	37.1622	1.97158	91.9598	73.9612	75.2033	73.4432	57.5	68.4211	73.913	100	1545	0.033726	1.24416
12	18KH1-160	407	106	0.260442	0.00367368	122.001	0.000833	5.32433	0.0436418	1200.48	5.32433	0.032	121.884	5.37	5.32433	0.0001	121.884	53700		18KH1-160	0	0	0	0	0	0	0	0	0	0	0	0	0	0	0	#DIV/0!	#DIV/0!
15	18KH1r_MR1_6	128.6	5.9	0.0458787	0.0057539	124.314	0.00167	8.69302	0.0699281	598.802	8.69302	0.025	124.009	10.76	8.69302	0.0001	124.009	107600		18KH1r_MR1_6	0	5.08972	2.80172	8.09628	54.7297	0.71048	76.3819	68.144	72.7642	60.6227	78.125	57.4899	72.6708	81.3008	1210.25	0.0109887	1.05107
12	18KH1-131	266.5	41.1	0.154221	0.00430695	124.341	0.000947	4.717	0.037936	1055.97	4.71701	0.033	124.252	6.1	4.71701	0.0001	124.252	61000		18KH1-131	0	0	0	0	0	0	0	0	0	0	0	0	0	0	0	#DIV/0!	#DIV/0!
15	18KH1cr-138	88.9	233.8	2.62992	0.00524673	126.243	0.00141	8.81595	0.069833	709.22	8.81595	0.027	125.935	9.08	8.81595	0.0001	125.935	90800		18KH1cr-138	0.118143	8.15661	0.161638	7.87746	44.5946	0	36.1809	28.8089	30.8943	27.1062	18.75	23.8866	30.4348	34.5528	1256.6	0	1.1888
15	18KH1cr-92	89.8	110.9	1.23497	0.00542906	129.799	0.001459	6.45518	0.0497321	685.401	6.45518	0.027	129.639	9.4	6.45518	0.0001	129.639	94000		18KH1cr-92	1.30802	5.74225	2.04741	19.6937	40.5405	2.13144	89.4472	100.831	86.9919	108.059	85	89.0688	85.0932	97.9675	1143.3	0.0353952	1.05117
12	18KH1-306	59.7	2.54	0.0425461	0.021665	133.602	0.00262	8.33874	0.0624145	381.679	8.33873	0.06	133.342	16.87	8.33873	603	133.342	0.0279768		18KH1-306	0	0	0	0	0	0	0	0	0	0	0	0	0	0	0	#DIV/0!	#DIV/0!
12	18KH1-266	102.1	29.4	0.287953	0.00905933	137.033	0.001429	4.30484	0.0314147	699.79	4.30484	0.046	136.965	9.21	4.30484	0.0001	136.965	92100		18KH1-266	0	0	0	0	0	0	0	0	0	0	0	0	0	0	0	#DIV/0!	#DIV/0!
15	18KH1cr-101	82.3	47.5	0.577157	0.00579525	140.116	0.001682	5.49823	0.0392405	594.53	5.49823	0.025	140.008	10.83	5.49823	0.0001	140.008	108300		18KH1cr-101	0	9.46166	3.01724	22.5383	47.2973	0.71048	62.3116	53.7396	52.439	68.8645	60.625	74.8988	89.441	81.7073	1389.47	0.0130873	0.696678
12	18KH1-307	82	2	0.0243902	0.0133601	141.065	0.00262	12.0535	0.0854469	381.679	12.0535	0.037	140.549	16.87	12.0535	0.0001	140.549	168700		18KH1-307	0	0	0	0	0	0	0	0	0	0	0	0	0	0	0	#DIV/0!	#DIV/0!
15	18KH1cr-53	51.2	107	2.08984	0.00644823	143.004	0.001671	6.29963	0.0440521	598.444	6.29963	0.028	142.865	10.76	6.29963	0.0001	142.865	107600		18KH1cr-53	0	4.40457	2.69397	19.256	42.5676	1.27886	119.598	67.036	75.2033	97.0696	82.5	78.9474	90.0621	105.285	1102.1	0.0179235	1.32795
15	18KH1cr-28	99.5	82.1	0.825126	0.00522606	150.069	0.00158	4.2784	0.0285096	632.911	4.2784	0.024	150.008	10.18	4.2784	0.0001	150.008	101800		18KH1cr-28	0	8.93964	3.87931	19.6937	44.5946	1.59858	48.7437	61.7729	53.252	58.4249	63.125	56.2753	61.4907	76.8293	1452.3	0.0342873	0.792701
12	18KH1-87	175.3	108.3	0.617798	0.00632116	155.323	0.001207	4.03393	0.0259712	828.5	4.03393	0.038	155.271	7.78	4.03393	0.0001	155.271	77800		18KH1-87	0	0	0	0	0	0	0	0	0	0	0	0	0	0	0	#DIV/0!	#DIV/0!
12	18KH1-776	106.4	51.2	0.481203	0.00327456	156.352	0.001485	5.42728	0.034712	673.401	5.42728	0.016	156.257	9.57	5.42728	0.0001	156.257	95700		18KH1-776	0.135021	16.509	3.34052	3.71991	22.2973	9.05861	85.4271	138.504	228.049	448.718	750	1016.19	1583.85	1756.1	1184.5	0.207557	0.0539363
15	18KH1cr-58	74.7	305.2	4.08568	0.00482363	172.17	0.0014	7.50403	0.0435849	714.286	7.50403	0.025	172.007	9.02	7.50403	0.0001	172.007	90200		18KH1cr-58	0.122363	4.73083	0.517241	12.9103	15.5405	1.7762	45.7286	49.0305	37.8049	34.9817	33.75	48.9879	48.4472	31.7073	1277.2	0.0666292	0.943886
12	18KH1-162	454	85.4	0.188106	0.00250195	172.507	0.000626	5.46013	0.0316517	1597.44	5.46013	0.029	172.42	4.03	5.46013	0.0001	172.42	40300		18KH1-162	0	0	0	0	0	0	0	0	0	0	0	0	0	0	0	#DIV/0!	#DIV/0!
12	18KH1-269	165.9	47	0.283303	0.00644823	183.397	0.001114	4.5706	0.0249219	897.666	4.5706	0.042	183.34	7.18	4.5706	0.0001	183.34	71800		18KH1-269	0	0	0	0	0	0	0	0	0	0	0	0	0	0	0	#DIV/0!	#DIV/0!
12	18KH1-155	123.8	84.8	0.684976	0.00478931	238.764	0.001121	4.86051	0.020357	892.061	4.86051	0.031	238.715	7.22	4.86051	0.0001	238.715	72200		18KH1-155	0	0	0	0	0	0	0	0	0	0	0	0	0	0	0	#DIV/0!	#DIV/0!
15	18KH1cr-143	93.3	184.8	1.98071	0.00197686	245.518	0.001304	5.35083	0.0217941	766.871	5.35083	0.011	245.459	8.4	5.35083	0.0001	245.459	84000		18KH1cr-143	0	14.3556	1.47629	8.3151	46.6216	0.213144	64.3216	61.4958	64.6341	68.1319	68.75	57.4899	86.9565	86.1789	1245.27	0.00389225	0.739698
15	18KH1cr-141	95.4	370.2	3.8805	0.00115933	466.72	0.001402	6.88619	0.0147544	713.267	6.88618	0.006	466.669	9.03	6.88618	0.0001	466.669	90300		18KH1cr-141	0	8.87439	3.34052	19.4748	33.5135	1.7762	46.2312	55.1247	65.8537	51.8315	62.5	59.5142	82.6087	56.0976	1339	0.0451247	0.55964
12	18KH1-297	95.6	42.7	0.446653	0.000891958	1350.01	0.001618	5.23004	0.00387407	618.047	5.23004	0.004	1350	10.42	5.23004	0.0001	1350	104200		18KH1-297	0	0	0	0	0	0	0	0	0	0	0	0	0	0	0	#DIV/0!	#DIV/0!
12	18KH1-267	176.8	62.1	0.351244	-0.000158629	6000	0.001151	4.24013	0.000706688	868.81	4.24013	-0.001	6000	7.42	4.24013	0.0001	6000	74200		18KH1-267	0	0	0	0	0	0	0	0	0	0	0	0	0	0	0	#DIV/0!	#DIV/0!
12	18KH1-169	146.7	85.2	0.580777	0.649511	15.2382	0.0458	15.0243	0.985958	21.8341	15.0243	0.1029	2.54467	288.7	15.0243	1676.2	2.54467	0.172235		18KH1-169	0	0	0	0	0	0	0	0	0	0	0	0	0	0	0	#DIV/0!	#DIV/0!
15	286R_89	157.7	65.2	0.413443	0.0759474	21.5677	0.00471	15.0389	0.697289	212.314	15.0389	0.117	15.4595	30.29	15.0389	1910	15.4595	0.0158586		286R_89	0	2.57749	3.23276	4.37637	43.9189	4.61812	72.8643	77.5623	63.4146	57.5092	55.625	48.583	49.6894	45.122	1375.05	0.081636	1.46639
15	18KH1cr-41	110.1	76.6	0.695731	0.016811	33.4769	0.00214	15.1291	0.451927	467.29	15.1291	0.057	29.8633	13.78	15.1291	491	29.8633	0.0280652		18KH1cr-41	0	10.3915	4.31034	29.5405	57.4324	3.90764	51.7588	67.59	55.6911	39.7436	32.5	43.3198	47.205	48.374	1462.6	0.071671	1.09647
12	18KH1c_332	397	25.2	0.0634761	0.649449	15.443	0.0559	15.2018	0.984384	17.8891	15.2018	0.0843	2.7185	350.6	15.2018	1298.6	2.7185	0.269983		18KH1c_332	0	2.25122	0.172414	0.262582	6.89189	2.48668	26.1307	117.452	280.488	479.853	1156.25	2044.53	3260.87	4390.24	1503.8	0.1853	0.0080134
12	18KH1-254	292	179	0.613014	0.11353	16.4426	0.0113	15.219	0.925586	88.4956	15.219	0.0729	6.22412	72.44	15.219	1010.3	6.22412	0.0717015		18KH1-254	0	0	0	0	0	0	0	0	0	0	0	0	0	0	0	#DIV/0!	#DIV/0!
12	18KH1-729	288.8	95.9	0.332064	0.17405	15.844	0.0146	15.243	0.962069	68.4931	15.243	0.0865	4.32232	93.44	15.243	1348.5	4.32232	0.0692918		18KH1-729	0	29.0375	1.2931	2.36324	29.0541	16.8739	94.9749	235.457	390.244	763.736	1275	1919.03	3074.53	3577.24	1315.31	0.321224	0.0308908
12	18KH1c_151	396.8	267	0.672883	2.32386	15.3704	0.179	15.2581	0.992699	5.58659	15.2581	0.0942	1.854	1061.5	15.2581	1511.3	1.854	0.702375		18KH1c_151	0.0218565	53.9967	-17.2414	2.71335	29.7297	8.70337	168.844	296.399	540.65	934.066	1543.75	2307.69	3540.37	4186.99	1082.53	0.122843	0.0476911
12	18KH1c_16	281	46.9	0.166904	0.507184	15.5669	0.0435	15.3458	0.985792	22.9885	15.3457	0.0846	2.61483	274.5	15.3457	1305.5	2.61483	0.210264		18KH1c_16	-0.7173	1.90865	-28.0172	2.14442	17.5676	1.93606	46.7337	50.9695	42.2764	75.8242	70	115.789	208.075	365.854	1184.5	0.067569	0.224601
12	18KH1-221	206	222	1.07767	0.480764	24.2634	0.0204	15.3692	0.633428	49.0196	15.3692	0.171	18.7751	130.18	15.3692	2567	18.7751	0.0507129		18KH1-221	0	0	0	0	0	0	0	0	0	0	0	0	0	0	0	#DIV/0!	#DIV/0!
35	18KH22_26	320.5	76.2	0.237754	0.0677045	15.89	0.00605	15.3796	0.967878	165.289	15.3796	0.0812	3.99504	38.88	15.3796	1225.4	3.99504	0.0317284		18KH22_26	0	0	0	0	0	0	0	0	0	0	0	0	0	0	0	#DIV/0!	#DIV/0!
12	18KH1c_275	69.3	53.7	0.774892	2.72301	15.6923	0.222	15.4871	0.986918	4.5045	15.4871	0.089	2.52998	1292.4	15.4871	1403.3	2.52998	0.920972		18KH1c_275	0	17.1289	0.18319	5.25164	15.1351	9.76909	103.015	204.986	362.195	628.205	1081.25	1437.25	2267.08	3056.91	1071.2	0.247406	0.0454395
12	SMALLTIP225	867	6	0.00692042	0.533606	15.6694	0.0437	15.5034	0.989402	22.8833	15.5034	0.0886	2.27523	275.7	15.5034	1394.7	2.27523	0.197677		SMALLTIP225	0	0	0	0	0	0	0	0	0	0	0	0	0	0	0	#DIV/0!	#DIV/0!
12	18KH1-157	307	99.1	0.322801	0.695483	17.6022	0.0423	15.5376	0.882709	23.6407	15.5376	0.1193	8.27162	267.1	15.5376	1945	8.27162	0.137326		18KH1-157	0	0	0	0	0	0	0	0	0	0	0	0	0	0	0	#DIV/0!	#DIV/0!
12	18KH1-697	623	993	1.5939	0.180919	15.9245	0.0143	15.5556	0.976833	69.9301	15.5556	0.0918	3.40787	91.53	15.5556	1462.4	3.40787	0.0625889		18KH1-697	0.675105	26.9168	4.9569	11.3786	104.73	6.2167	240.201	443.213	723.577	1205.13	1981.25	2825.91	4596.27	4918.7	1057.81	0.0391956	0.0522599
12	18KH1c_246	84	30.1	0.358333	2.69462	16.144	0.208	15.5556	0.963552	4.80769	15.5556	0.094	4.31887	1218.2	15.5556	1507.3	4.31887	0.8082		18KH1c_246	-0.632911	6.47635	-16.1638	1.24726	9.86486	5.15098	31.6583	80.6094	156.504	236.264	488.125	635.628	819.876	1065.04	1034.12	0.291474	0.0386135
12	18KH1-234	1100	25.4	0.0230909	0.164941	15.9405	0.0136	15.6115	0.97936	73.5294	15.6115	0.088	3.22198	87.08	15.6115	1381.6	3.22198	0.0630284		18KH1-234	0	0	0	0	0	0	0	0	0	0	0	0	0	0	0	#DIV/0!	#DIV/0!
12	18KH1-300	1856	33.8	0.0182112	0.40426	15.75	0.0362	15.6397	0.992995	27.6243	15.6397	0.08103	1.86096	229.2	15.6397	1221.3	1.86096	0.187669		18KH1-300	0	0	0	0	0	0	0	0	0	0	0	0	0	0	0	#DIV/0!	#DIV/0!
12	18KH1c_424	633	19.7	0.0311216	0.588753	15.9135	0.0532	15.7701	0.990988	18.797	15.7701	0.0803	2.13158	334.1	15.7701	1203.5	2.13158	0.277607		18KH1c_424	0	0.880914	-8.62069	1.88184	25	9.23623	44.2211	78.3934	112.602	168.498	227.5	323.887	745.342	914.634	1268.96	0.277786	0.05933
12	18KH1-22	156.7	73.8	0.470964	0.0489144	29.6133	0.00467	15.8	0.533543	214.133	15.8	0.076	25.0462	30.03	15.8	1094	25.0462	0.0274497		18KH1-22	0	0	0	0	0	0	0	0	0	0	0	0	0	0	0	#DIV/0!	#DIV/0!
12	18KH1-317	219.2	82.7	0.377281	0.621785	16.2246	0.0492	15.8185	0.974969	20.3252	15.8185	0.0917	3.6074	309.6	15.8185	1460.3	3.6074	0.212011		18KH1-317	0	0	0	0	0	0	0	0	0	0	0	0	0	0	0	#DIV/0!	#DIV/0!
35	286_72	399.3	53.5	0.133984	0.0619051	16.1928	0.00607	15.8188	0.976906	164.745	15.8188	0.074	3.45988	39.01	15.8188	1040.6	3.45988	0.037488		286_72	0	0	0	0	0	0	0	0	0	0	0	0	0	0	0	#DIV/0!	#DIV/0!
12	18KH1-721	318.2	172.8	0.543055	0.210585	16.4456	0.0159	15.8906	0.966253	62.8931	15.8906	0.0961	4.2363	101.69	15.8906	1548.9	4.2363	0.065653		18KH1-721	0.548523	15.9869	9.26724	23.6324	129.73	23.4458	382.412	795.014	1451.22	2820.51	4012.5	5668.02	8434.78	9512.2	1357.54	0.105264	0.0453375
12	18KH1c_27	856	42.2	0.0492991	0.00569133	24.7938	0.00089	15.8976	0.641191	1123.6	15.8976	0.0464	19.0263	5.73	15.8976	17.4	19.0263	0.32931		18KH1c_27	-1.56118	6.7863	-175.647	5.62363	42.1622	9.05861	81.407	141.828	184.959	351.648	631.25	1056.68	1701.86	2260.16	1380.2	0.154621	0.0478341
12	18KH1c_51	585	13.5	0.0230769	1.74654	16.0987	0.146	15.9204	0.988926	6.84931	15.9204	0.0868	2.38919	878.5	15.9204	1355.2	2.38919	0.648244		18KH1c_51	0.0218143	0.750408	0.304957	0.503282	9.59459	3.5524	32.1608	123.823	250	463.37	731.25	1497.98	2478.26	3373.98	1431.7	0.20223	0.0129772
12	18KH1c_371	514	45.9	0.0892996	0.319385	16.2877	0.0284	16.0111	0.983019	35.2113	16.0111	0.0816	2.98889	180.5	16.0111	1235.1	2.98889	0.146142		18KH1c_371	0.0131224	2.64274	1.09914	3.19475	9.45946	-0.284192	54.2714	98.615	145.528	219.78	518.75	886.64	1509.32	2186.99	1318.4	-0.0125428	0.0359576
35	125_95	409	245	0.599022	0.0625725	16.7965	0.00549	16.013	0.953356	182.149	16.013	0.0827	5.06997	35.29	16.013	1261.3	5.06997	0.0279791		125_95	0.464135	33.1158	1.25	4.24508	16.0135	6.92718	52.7638	86.7036	140.244	283.883	488.125	827.53	1478.26	2211.38	1575.9	0.238311	0.0356932
35	125_81	211.6	53.3	0.25189	0.707627	16.2154	0.063	16.0388	0.989106	15.873	16.0388	0.0815	2.38701	393.8	16.0388	1232.6	2.38701	0.319487		125_81	0.0189873	2.61011	0.603448	3.08534	23.1081	1.66963	56.7337	67.313	79.6748	111.722	158.125	218.623	347.826	434.959	1411.1	0.0461123	0.163109
12	18KH1c_427	1131	320.2	0.283112	0.04923	16.6135	0.0063	16.0388	0.965408	158.73	16.0388	0.0567	4.33187	40.49	16.0388	478.9	4.33187	0.0845479		18KH1c_427	-0.00675105	14.1436	-11.8534	13.5667	31.0811	15.6306	104.02	194.183	346.748	604.396	1000	1417	2937.89	3894.31	1287.5	0.274895	0.0354064
12	18KH1-54	364.4	33.2	0.0911087	0.322643	16.5701	0.0252	16.0388	0.967933	39.6825	16.0388	0.0929	4.16258	160.4	16.0388	1485	4.16258	0.108013		18KH1-54	0	0	0	0	0	0	0	0	0	0	0	0	0	0	0	#DIV/0!	#DIV/0!
12	18KH1c_21	496	250	0.504032	0.35488	16.5731	0.0289	16.0823	0.970385	34.6021	16.0823	0.0891	4.00348	183.7	16.0823	1405.4	4.00348	0.13071		18KH1c_21	-0.506329	37.3573	0.327586	0.700219	18.2432	2.13144	81.407	198.061	380.488	827.839	1681.25	2744.94	4409.94	5853.66	1400.8	0.0553084	0.0184599
35	125_52	512	161.2	0.314844	0.0875489	16.3594	0.0075	16.1645	0.988087	133.333	16.1645	0.0847	2.51769	48.17	16.1645	1307.8	2.51769	0.0368328		125_52	0.0506329	5.79119	1.45474	5.62363	27.8378	8.20604	131.658	228.532	457.724	749.084	1256.25	1995.95	2881.99	3313.01	1145.36	0.135548	0.0456832
12	18KH1c_25	474	346.2	0.73038	2.12619	16.2637	0.15	16.1645	0.993898	6.66667	16.1645	0.10285	1.79397	901	16.1645	1675.3	1.79397	0.537814		18KH1c_25	-1.26582	41.7618	-132.543	7.00219	96.6216	33.9254	340.201	512.465	695.122	1036.63	1500	1866.4	2521.74	2995.93	918.76	0.18712	0.134907
12	18KH1-271	275	56.3	0.204727	0.0313178	22.6853	0.00299	16.2174	0.714887	334.448	16.2174	0.076	15.8625	19.25	16.2174	1094	15.8625	0.017596		18KH1-271	0	0	0	0	0	0	0	0	0	0	0	0	0	0	0	#DIV/0!	#DIV/0!
15	309-1_22	174.2	215	1.23421	1.35525	16.3733	0.112	16.2352	0.991567	8.92857	16.2352	0.0878	2.12195	684.4	16.2352	1377.2	2.12195	0.49695		309-1_22	0	12.7243	2.24138	7.22101	25.6757	2.30906	49.7487	54.5706	61.3821	69.5971	67.5	63.5628	76.3975	49.5935	1277.2	0.0646075	0.651183
35	18KH1_17	278.6	31	0.111271	0.119931	16.6209	0.0099	16.3245	0.982166	101.01	16.3245	0.0879	3.12496	63.51	16.3245	1379.4	3.12496	0.0460418		18KH1_17	0	0	0	0	0	0	0	0	0	0	0	0	0	0	0	#DIV/0!	#DIV/0!
15	18KH9r_75	186.6	70.1	0.37567	0.550103	16.5615	0.0494	16.3568	0.987642	20.2429	16.3568	0.0808	2.59558	310.8	16.3568	1215.7	2.59558	0.255655		18KH9r_75	0.0172574	2.38173	1.17457	5.25164	66.8919	2.6643	48.7437	52.9086	35.7724	28.3883	23.125	16.5992	24.2236	15.0407	1143.3	0.0466591	2.01224
12	18KH1c_297	793	51.3	0.064691	0.265123	16.5891	0.0246	16.422	0.989928	40.6504	16.422	0.0782	2.34851	156.7	16.422	1151.1	2.34851	0.136131		18KH1c_297	0	0.685155	0.344828	2.14442	21.6216	1.15453	106.533	191.136	337.398	368.132	593.75	736.842	956.522	1223.58	1404.92	0.0240558	0.111375
12	18KH1c_369	562	581	1.03381	0.613618	16.5465	0.0454	16.461	0.994837	22.0264	16.461	0.09807	1.67925	286.2	16.461	1586.9	1.67925	0.180352		18KH1c_369	-0.0227848	106.688	0.625	12.9103	58.7838	28.0639	279.397	592.798	1150.41	1677.66	3050	3995.95	5273.29	6504.07	1014.55	0.218982	0.0529834
35	18KH9_43	355.6	40.2	0.113048	0.0228183	19.193	0.00208	16.5072	0.860062	480.769	16.5072	0.0796	9.79206	13.39	16.5072	1186.2	9.79206	0.0112881		18KH9_43	0.0886076	1.87602	0.571121	3.63239	22.027	3.35702	69.8492	97.5069	113.821	141.026	194.375	295.547	453.416	528.455	1380.2	0.0855844	0.154051
12	18KH1c_250	259	47.8	0.184556	2.75305	16.6763	0.22	16.5245	0.990898	4.54545	16.5245	0.0908	2.24487	1281.9	16.5245	1441.6	2.24487	0.88922		18KH1c_250	0.0213924	0.848287	-54.9569	6.34573	33.1081	1.24334	151.759	155.125	127.642	102.564	146.25	210.526	291.925	369.919	1246.3	0.0175406	0.519855
[truncated: 375 more rows]

## Sheet: Restored Zrc Ages
Spot #	238U/206Pb	%2σ	207Pb/206Pb	%2σ		Reconstructed 207Pb/206Pb	Upper Intercept %2σ		238U/206Pb 2σ	238U/206Pb + 2σ	Upper Intercept + Uncertainty		207Pb/206Pb 2σ	207Pb/206Pb +2σ	Upper Intercept + Uncertainty	Upper Intercept 2σ	Upper Intercept %2σ
[truncated: 1,750 more rows]

[truncated: 5 more sheets: Zrc Stds, XRF (Whole-rock), EPMA (Rt), EPMA (Fsp-Gnt), ICP Gnt]
